# Supplementary material for: A Liquid Chromatography with Tandem Mass Spectrometry-Based Proteomic Analysis of Cells Cultured in DMEM 10% FBS and Chemically Defined Medium Using Human Adipose-Derived Mesenchymal Stem Cells
Source: MDPI journal article supplement (doi:10.3390/ijms19072042), 2018-07-13
Supplement: s1 [file s1]

## Supplementary Materials

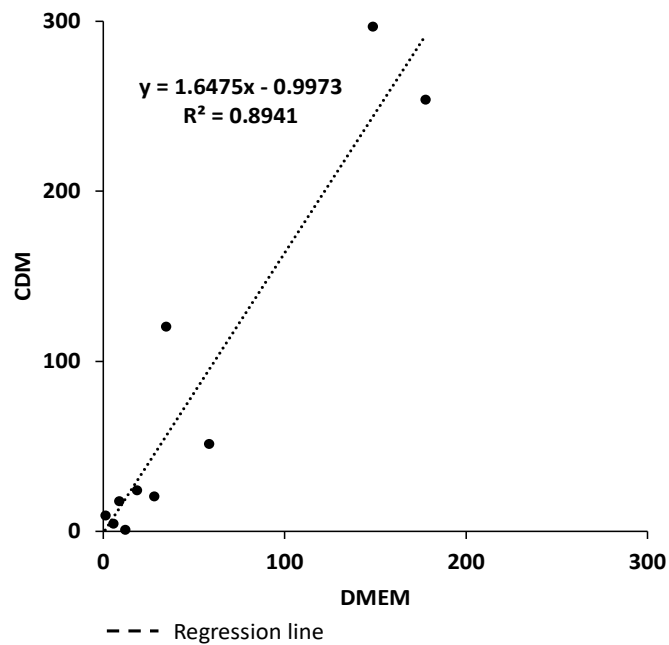

**Figure S1.** A scatter plot of the housekeeping genes' quantitative values. A scatter plot showing the correlation ( $R^2 = 0.8941$ ) between the quantitative value of the CDM hADSCs and DMEM hADSCs: TFRC, YWHAZ, RPLP0, RPLP1, RPLP2, B2M, RPS18, PGK1, PPIA, and GAPDH ( $n = 10$ ). The dotted line is the regression line. Each dot shows the abbreviated name of the protein.  $n = 1$ .

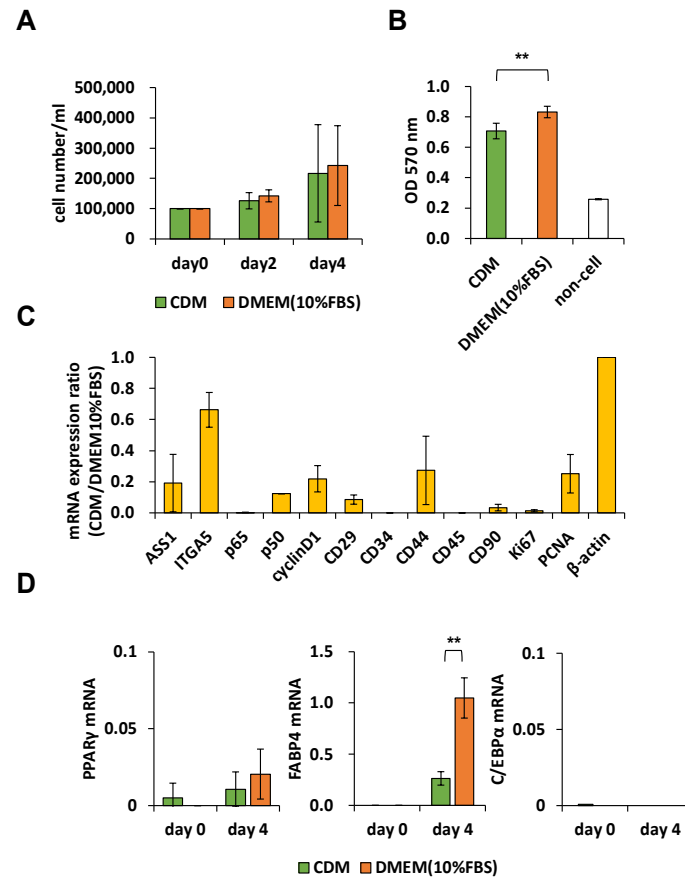

**Figure S2.** The evaluation of the cell growth ability, gene expression characteristics, and early adipocyte differentiation potential of hADSCs cultured in CDM or DMEM. Cell proliferation assays. hADSCs were counted after 2 and 4 days of culture in the CDM or DMEM (10% FBS).  $n = 4$ . Data are represented as the mean  $\pm$  S.D. (A). MTT cell count assays. hADSCs were analyzed after 4 days of culture in CDM or DMEM (10% FBS). Each measurement was obtained using a microplate reader.  $n = 4$ . Data are represented as the mean  $\pm$  S.D. \*\*  $p < 0.01$  (B). The expression rate of various gene mRNAs expressed in ADSCs cultured in CDM was compared with that of ADSCs cultured in DMEM (10% FBS). cDNA was synthesized using ADSCs that had been cultured in both CDM and DMEM (10% FBS) for 48 h. The expression was calculated using the  $\Delta\Delta C_t$  method. The expression of the target gene was corrected by the expression of the housekeeping gene ( $\beta$ -actin). Real time PCR was performed to detect factors related to the cell cycle, cell surface markers, and cell proliferation. The expression of various factors expressed by hADSCs cultured in DMEM (10% FBS) medium was defined as 1. The vertical axis shows the expression ratio of various factors expressed by hADSCs cultured in CDM.  $n = 4$ . Data are represented as the mean  $\pm$  S.D. (C). The expression of adipocyte differentiation marker gene mRNA on days 0 and 4 was shown by inducing the differentiation of ADSCs cultured in CDM or DMEM (10% FBS) into adipocytes. The expression was calculated using the  $\Delta\Delta C_t$  method. When determining the expression of the target gene, the expression of the housekeeping gene ( $\beta$ -actin) was taken as 1.  $n = 4$ . Data are represented as the mean  $\pm$  S.D. \*\*  $p < 0.01$  (D).

**Table S1.** Identification of endogenous proteins contained in hADSC cultured in medium, Chemically Defined.

**Table S1.** Identification of endogenous proteins contained in hADSC cultured in medium, Chemically Defined.

| UniProt/EMBL/PROT ID | Description                                                                           | Protein score <sup>a</sup> | Protein mass (kDa) | pI <sup>b</sup> | Num. of matches <sup>c</sup> | Num. of significant matches <sup>d</sup> | Num. of sequences <sup>e</sup> | Num. of significant sequences <sup>f</sup> | Num. of unique sequences <sup>g</sup> | Sequence coverage <sup>h</sup> | emPAI |
|----------------------|---------------------------------------------------------------------------------------|----------------------------|--------------------|-----------------|------------------------------|------------------------------------------|--------------------------------|--------------------------------------------|---------------------------------------|--------------------------------|-------|
| ACTB1_HUMAN          | Putative beta-actin-like protein 3                                                    | 814                        | 41889              | 5.31            | 240                          | 84                                       | 5                              | 5                                          | 1                                     | 0.18                           | 0.64  |
| ALBU_HUMAN           | Serum albumin                                                                         | 5054                       | 69221              | 5.22            | 1087                         | 544                                      | 44                             | 35                                         | 44                                    | 0.76                           | 10.79 |
| VIM2_HUMAN           | Vimentin                                                                              | 5780                       | 53815              | 5.06            | 1038                         | 421                                      | 48                             | 39                                         | 46                                    | 0.79                           | 21.41 |
| MYO9_HUMAN           | Myosin-9                                                                              | 7160                       | 226392             | 5.5             | 438                          | 231                                      | 54                             | 75                                         | 54                                    | 0.54                           | 1.98  |
| ENO4_HUMAN           | Alpha-enolase                                                                         | 5608                       | 47139              | 7.01            | 410                          | 221                                      | 20                             | 16                                         | 12                                    | 0.67                           | 4.95  |
| GDP_HUMAN            | Glyceroldehyde-3-phosphate dehydrogenase                                              | 5249                       | 36030              | 8.57            | 489                          | 202                                      | 15                             | 14                                         | 8                                     | 0.71                           | 11.59 |
| KPF1_HUMAN           | Pyruvate kinase PKM                                                                   | 4800                       | 57000              | 7.96            | 385                          | 231                                      | 33                             | 29                                         | 7                                     | 0.7                            | 8.01  |
| TBBA_HUMAN           | Tubulin beta-2A chain                                                                 | 5170                       | 49875              | 4.78            | 331                          | 188                                      | 23                             | 17                                         | 3                                     | 0.75                           | 4.78  |
| TBBB_HUMAN           | Tubulin beta-8 chain                                                                  | 2182                       | 48825              | 4.77            | 233                          | 151                                      | 20                             | 16                                         | 10                                    | 0.7                            | 4.92  |
| S10A_HUMAN           | Protein S100-A6                                                                       | 4259                       | 10173              | 5.33            | 140                          | 104                                      | 7                              | 4                                          | 7                                     | 0.39                           | 6.25  |
| FLNA_HUMAN           | Filamin-A                                                                             | 3555                       | 280564             | 5.7             | 359                          | 190                                      | 79                             | 47                                         | 75                                    | 0.52                           | 1.11  |
| FLNB_HUMAN           | Filamin-B                                                                             | 796                        | 277990             | 5.47            | 60                           | 29                                       | 30                             | 17                                         | 25                                    | 0.25                           | 0.29  |
| FLNC_HUMAN           | Filamin-C                                                                             | 478                        | 280841             | 5.65            | 41                           | 15                                       | 25                             | 13                                         | 22                                    | 0.18                           | 0.21  |
| HSPA_HUMAN           | Heat shock protein HSP 90- $\alpha$ ha                                                | 3130                       | 84607              | 4.84            | 343                          | 197                                      | 35                             | 25                                         | 21                                    | 0.65                           | 3.19  |
| ENPL_HUMAN           | Endoplasmic                                                                           | 1990                       | 92411              | 4.76            | 150                          | 77                                       | 35                             | 21                                         | 33                                    | 0.53                           | 1.58  |
| TRAP1_HUMAN          | Heat shock protein 75 kDa, mitochondrial                                              | 765                        | 80860              | 9.3             | 32                           | 24                                       | 5                              | 2                                          | 5                                     | 0.11                           | 0.11  |
| TLN1_HUMAN           | Talin1                                                                                | 3355                       | 269599             | 5.77            | 176                          | 127                                      | 64                             | 43                                         | 64                                    | 0.47                           | 1.01  |
| FAT2_HUMAN           | Fatty acid synthase                                                                   | 3142                       | 212254             | 6.01            | 188                          | 120                                      | 63                             | 45                                         | 46                                    | 0.43                           | 1.12  |
| EFZ2_HUMAN           | Elongation factor 2                                                                   | 3095                       | 95277              | 6.41            | 203                          | 152                                      | 35                             | 26                                         | 35                                    | 0.65                           | 2.57  |
| GSP1_HUMAN           | 78 kDa glucose-regulated protein                                                      | 3083                       | 72288              | 5.07            | 182                          | 131                                      | 29                             | 22                                         | 25                                    | 0.66                           | 2.78  |
| GPOT1_HUMAN          | Stress70 protein, mitochondrial                                                       | 5019                       | 73835              | 5.97            | 37                           | 26                                       | 16                             | 11                                         | 16                                    | 0.36                           | 0.97  |
| HS1A2_HUMAN          | Heat shock 70 kDa protein 1A                                                          | 247                        | 70059              | 5.48            | 25                           | 15                                       | 7                              | 6                                          | 5                                     | 0.22                           | 0.43  |
| LEI1_HUMAN           | Gelsolin1                                                                             | 2041                       | 47006              | 5.34            | 232                          | 114                                      | 7                              | 5                                          | 7                                     | 0.66                           | 4.04  |
| AMPH_HUMAN           | Aminopeptidase N                                                                      | 3035                       | 109471             | 5.31            | 129                          | 96                                       | 30                             | 22                                         | 30                                    | 0.42                           | 1.6   |
| COG4_HUMAN           | CoG4p- $\alpha$ ha(3V) chain                                                          | 2932                       | 343457             | 6.26            | 164                          | 122                                      | 55                             | 39                                         | 55                                    | 0.35                           | 0.63  |
| GAP1_HUMAN           | Adenyl cyclase-associated protein 1                                                   | 2629                       | 51880              | 5.24            | 148                          | 92                                       | 18                             | 11                                         | 4                                     | 0.49                           | 1.42  |
| IGGA1_HUMAN          | Ras GTPase-activating-like protein IGAP1                                              | 2624                       | 189134             | 6.08            | 131                          | 97                                       | 43                             | 35                                         | 43                                    | 0.44                           | 1.27  |
| PGAI_HUMAN           | Protein disulfide-isomerase                                                           | 2584                       | 57081              | 4.76            | 227                          | 96                                       | 26                             | 14                                         | 26                                    | 0.61                           | 1.78  |
| ALDOA_HUMAN          | Fructose-bisphosphate aldolase A                                                      | 2576                       | 39395              | 8.3             | 178                          | 87                                       | 20                             | 16                                         | 20                                    | 0.78                           | 6.42  |
| DYNC1_HUMAN          | Cytoplasmic dynein 1 heavy chain 1                                                    | 2523                       | 532072             | 6.01            | 153                          | 92                                       | 67                             | 43                                         | 67                                    | 0.29                           | 0.4   |
| TBR1_HUMAN           | Transcriptional endonuclease, reticulum A13type                                       | 1460                       | 89268              | 5.14            | 111                          | 66                                       | 24                             | 13                                         | 13                                    | 0.55                           | 2.54  |
| UBA1_HUMAN           | Ubiquitin- $\alpha$ ha modifier-activating enzyme 1                                   | 2362                       | 117774             | 5.49            | 134                          | 98                                       | 34                             | 27                                         | 16                                    | 0.65                           | 2.01  |
| CANX_HUMAN           | Calnexin-2 subunit, putative                                                          | 2091                       | 79945              | 4.87            | 95                           | 76                                       | 24                             | 21                                         | 23                                    | 0.59                           | 2.53  |
| ACTN1_HUMAN          | Actinin-actinin-1                                                                     | 3032                       | 102913             | 5.25            | 156                          | 95                                       | 43                             | 24                                         | 29                                    | 0.63                           | 3.49  |
| ACTN4_HUMAN          | Actinin-actinin-4                                                                     | 1417                       | 104788             | 5.27            | 114                          | 70                                       | 23                             | 20                                         | 19                                    | 0.52                           | 1.41  |
| COX4_HUMAN           | CoG4p- $\alpha$ ha(3V) chain                                                          | 10045                      | 104642             | 5.26            | 100                          | 67                                       | 25                             | 17                                         | 17                                    | 0.45                           | 1.16  |
| SERP1_HUMAN          | Serpin H1                                                                             | 1995                       | 46411              | 8.75            | 167                          | 114                                      | 23                             | 21                                         | 23                                    | 0.65                           | 6.2   |
| GELS_HUMAN           | Gelsolin                                                                              | 1555                       | 85644              | 5.9             | 110                          | 77                                       | 22                             | 17                                         | 15                                    | 0.6                            | 1.78  |
| STAT1_HUMAN          | Signal transducer and activator of transcription 1- $\alpha$ ha/beta                  | 1909                       | 87280              | 5.74            | 75                           | 22                                       | 17                             | 12                                         | 12                                    | 0.35                           | 0.81  |
| CHG1_HUMAN           | 60 kDa heat shock protein, mitochondrial                                              | 1873                       | 61016              | 5.7             | 103                          | 72                                       | 25                             | 20                                         | 16                                    | 0.6                            | 3.2   |
| HSP_HUMAN            | 14-3-3 protein eta                                                                    | 175                        | 28203              | 4.76            | 30                           | 4                                        | 4                              | 3                                          | 2                                     | 0.15                           | 0.55  |
| ANXA2_HUMAN          | AnneXin A2                                                                            | 1778                       | 36580              | 7.57            | 152                          | 102                                      | 19                             | 16                                         | 19                                    | 0.68                           | 5.23  |
| THO2_HUMAN           | Thioredoxin                                                                           | 1685                       | 11730              | 4.92            | 61                           | 51                                       | 7                              | 4                                          | 7                                     | 0.74                           | 4.63  |
| LDHA_HUMAN           | L-lactate dehydrogenase A chain                                                       | 1670                       | 36665              | 5.44            | 156                          | 82                                       | 19                             | 15                                         | 12                                    | 0.79                           | 4.68  |
| LDHB_HUMAN           | L-lactate dehydrogenase B chain                                                       | 1369                       | 36615              | 5.71            | 142                          | 64                                       | 13                             | 10                                         | 12                                    | 0.55                           | 2.48  |
| TYT1_HUMAN           | Transketolase                                                                         | 1662                       | 61835              | 7.58            | 68                           | 67                                       | 22                             | 16                                         | 22                                    | 0.64                           | 2.67  |
| PLG2_HUMAN           | Fibrin                                                                                | 1634                       | 531466             | 5.74            | 126                          | 74                                       | 60                             | 34                                         | 60                                    | 0.22                           | 0.31  |
| FBN1_HUMAN           | Fibrillin-1                                                                           | 1631                       | 262460             | 5.46            | 131                          | 81                                       | 47                             | 33                                         | 47                                    | 0.36                           | 0.78  |
| ACT1_HUMAN           | ATP-kinase synthase                                                                   | 1857                       | 120762             | 6.95            | 160                          | 105                                      | 19                             | 16                                         | 19                                    | 0.45                           | 0.93  |
| GSTP1_HUMAN          | Glutathione S-transferase P                                                           | 1561                       | 23341              | 5.43            | 75                           | 51                                       | 12                             | 10                                         | 9                                     | 0.68                           | 6.02  |
| GOT1_HUMAN           | Got1-1                                                                                | 1554                       | 14891              | 6.22            | 163                          | 99                                       | 10                             | 9                                          | 7                                     | 0.6                            | 6.37  |
| PROT1_HUMAN          | Protein-1                                                                             | 1514                       | 15045              | 8.44            | 172                          | 83                                       | 10                             | 7                                          | 10                                    | 0.68                           | 7.75  |
| S10B_HUMAN           | Protein S100-B1                                                                       | 1465                       | 11733              | 6.56            | 92                           | 73                                       | 5                              | 5                                          | 5                                     | 0.65                           | 21.41 |
| IMD1_HUMAN           | Importin subunit beta-1                                                               | 1416                       | 57103              | 4.68            | 81                           | 57                                       | 24                             | 24                                         | 24                                    | 0.54                           | 1.91  |
| PDIA3_HUMAN          | Protein disulfide-isomerase A3                                                        | 1376                       | 56747              | 5.86            | 134                          | 67                                       | 21                             | 15                                         | 5                                     | 0.57                           | 2.24  |
| TSP1_HUMAN           | Thrombospondin-1                                                                      | 1301                       | 126300             | 4.71            | 131                          | 69                                       | 27                             | 18                                         | 27                                    | 0.32                           | 0.97  |
| ATP1_HUMAN           | ATP synthase subunit beta, mitochondrial                                              | 1272                       | 56525              | 5.26            | 116                          | 62                                       | 26                             | 24                                         | 6                                     | 0.78                           | 5.33  |
| TPS1_HUMAN           | Troponin phosphatase isomerase                                                        | 1247                       | 30772              | 5.85            | 101                          | 63                                       | 14                             | 11                                         | 12                                    | 0.72                           | 4.04  |
| ANXA1_HUMAN          | AnneXin A1                                                                            | 1235                       | 36866              | 6.57            | 85                           | 52                                       | 16                             | 14                                         | 16                                    | 0.61                           | 3.49  |
| TAGL2_HUMAN          | Transglutinin-2                                                                       | 1233                       | 22377              | 8.41            | 91                           | 61                                       | 15                             | 11                                         | 15                                    | 0.74                           | 8.1   |
| EDHA_HUMAN           | Trifunctional enzyme subunit $\alpha$ ha, mitochondrial                               | 1215                       | 82947              | 9.16            | 54                           | 39                                       | 17                             | 14                                         | 17                                    | 0.45                           | 1.12  |
| PGK1_HUMAN           | Phosphoglycerate kinase 1                                                             | 1192                       | 44586              | 8.5             | 67                           | 46                                       | 18                             | 11                                         | 18                                    | 0.6                            | 2.36  |
| PRKDC_HUMAN          | DNA-dependent protein kinase catalytic subunit                                        | 1180                       | 468788             | 8.75            | 78                           | 41                                       | 44                             | 23                                         | 44                                    | 0.21                           | 0.25  |
| MYF1_HUMAN           | Major myofibrin protein                                                               | 1145                       | 49266              | 5.34            | 61                           | 45                                       | 21                             | 17                                         | 45                                    | 0.53                           | 1.14  |
| PLIN2_HUMAN          | Perilipin-2                                                                           | 868                        | 47046              | 5.3             | 49                           | 38                                       | 16                             | 15                                         | 2                                     | 0.61                           | 2.77  |
| TOP1_HUMAN           | T-complex protein 1 subunit beta                                                      | 1110                       | 57452              | 6.01            | 53                           | 30                                       | 15                             | 10                                         | 15                                    | 0.48                           | 1.07  |
| COX1_HUMAN           | CoG4p- $\alpha$ ha(3V) chain                                                          | 1106                       | 130857             | 5.6             | 99                           | 55                                       | 29                             | 20                                         | 11                                    | 0.39                           | 1.0   |
| HYOU1_HUMAN          | Hypoxia up-regulated protein 1                                                        | 1077                       | 111268             | 5.16            | 47                           | 34                                       | 12                             | 9                                          | 7                                     | 0.26                           | 0.46  |
| MARCKS_HUMAN         | Myristic acid domain-rich C-kinase substrate                                          | 1071                       | 31536              | 4.47            | 103                          | 80                                       | 9                              | 4                                          | 5                                     | 0.3                            | 0.93  |
| DPTL2_HUMAN          | Dihydropyrimidinase-related protein 2                                                 | 1058                       | 62255              | 5.95            | 54                           | 35                                       | 12                             | 12                                         | 12                                    | 0.6                            | 1.39  |
| DPTL3_HUMAN          | Dihydropyrimidinase-related protein 3                                                 | 536                        | 61924              | 6.04            | 29                           | 18                                       | 12                             | 6                                          | 10                                    | 0.45                           | 0.5   |
| WDR1_HUMAN           | WD repeat-containing protein 1                                                        | 1038                       | 60152              | 6.17            | 59                           | 29                                       | 18                             | 12                                         | 18                                    | 0.59                           | 1.27  |
| GDI2_HUMAN           | Ras GDP dissociation inhibitor beta                                                   | 1030                       | 50631              | 8.11            | 84                           | 37                                       | 14                             | 11                                         | 9                                     | 0.43                           | 1.47  |
| GDI1_HUMAN           | Ras GDP dissociation inhibitor alpha                                                  | 965                        | 50550              | 5               | 45                           | 22                                       | 11                             | 6                                          | 6                                     | 0.37                           | 0.64  |
| FSCN1_HUMAN          | Fascin                                                                                | 1025                       | 54466              | 6.84            | 55                           | 43                                       | 16                             | 13                                         | 16                                    | 0.52                           | 1.92  |
| RPN2_HUMAN           | Daltonyl- $\alpha$ -phosphogluconate- $\alpha$ -protein glycosyltransferase subunit 2 | 1016                       | 69241              | 5.44            | 45                           | 35                                       | 15                             | 12                                         | 15                                    | 0.51                           | 1.06  |
| SGSH_HUMAN           | Transforming growth factor-beta-induced protein $\alpha$ -3                           | 1000                       | 74634              | 7.62            | 52                           | 35                                       | 14                             | 7                                          | 14                                    | 0.45                           | 0.57  |
| ML12_HUMAN           | Myosin regulatory light chain 12B                                                     | 995                        | 19767              | 4.71            | 49                           | 26                                       | 11                             | 8                                          | 6                                     | 0.93                           | 4.3   |
| MYL2_HUMAN           | Myosin regulatory light polypeptide 9                                                 | 350                        | 18914              | 4.6             | 31                           | 12                                       | 7                              | 4                                          | 2                                     | 0.48                           | 1.29  |
| CATL1_HUMAN          | Cathepsin B                                                                           | 977                        | 57757              | 5.68            | 68                           | 34                                       | 9                              | 8                                          | 9                                     | 0.42                           | 2     |
| GARS_HUMAN           | Glycine- $\alpha$ -RNA lyase                                                          | 972                        | 83113              | 6.61            | 59                           | 34                                       | 16                             | 11                                         | 10                                    | 0.54                           | 0.93  |
| TOP2_HUMAN           | T-complex protein 1 subunit zeta                                                      | 965                        | 57888              | 6.23            | 45                           | 34                                       | 13                             | 13                                         | 13                                    | 0.47                           | 1.21  |
| ANXA5_HUMAN          | AnneXin A5                                                                            | 964                        | 55914              | 6.84            | 112                          | 51                                       | 18                             | 11                                         | 18                                    | 0.69                           | 4.04  |
| ATPA_HUMAN           | ATP synthase subunit alpha, mitochondrial                                             | 947                        | 59714              | 9.16            | 60                           | 45                                       | 16                             | 11                                         | 3                                     | 0.44                           | 1.31  |
| PRDX1_HUMAN          | Peroxidase (peroxisomal)                                                              | 938                        | 25015              | 6               | 71                           | 40                                       | 14                             | 10                                         | 14                                    | 0.51                           | 4.23  |
| LPFR1_HUMAN          | Leucine-rich PPR motif-containing protein, mitochondrial                              | 925                        | 187805             | 5.81            | 51                           | 31                                       | 22                             | 11                                         | 22                                    | 0.3                            | 0.34  |
| CATL2_HUMAN          | Cathepsin K                                                                           | 916                        | 36842              | 6.72            | 34                           | 28                                       | 7                              | 6                                          | 7                                     | 0.53                           | 1.75  |
| ARF1_HUMAN           | ADP-ribosylation factor 4                                                             | 575                        | 20460              | 6.59            | 39                           | 23                                       | 8                              | 5                                          | 8                                     | 0.66                           | 2.33  |
| RN2_HUMAN            | Ribonuclease inhibitor                                                                | 898                        | 49841              | 4.71            | 68                           | 31                                       | 19                             | 15                                         | 19                                    | 0.73                           | 2.49  |
| COPI1_HUMAN          | Cotaxin subunit gamma-1                                                               | 855                        | 91655              | 5.32            | 51                           | 25                                       | 22                             | 15                                         | 22                                    | 0.45                           | 1.07  |
| PLT2_HUMAN           | Plasmin-3                                                                             | 856                        | 70766              | 5.41            | 52                           | 38                                       | 19                             | 15                                         | 19                                    | 0.57                           | 1.42  |
| PGAM1_HUMAN          | Phosphoglycerate mutase 1                                                             | 846                        | 28786              | 6.67            | 102                          | 45                                       | 12                             | 7                                          | 12                                    | 0.66                           | 2.17  |
| PABP1_HUMAN          | Poly(A)-binding protein 1                                                             | 831                        | 70726              | 5.31            | 27                           | 17                                       | 8                              | 4                                          | 8                                     | 0.21                           | 0.34  |
| GPI1_HUMAN           | Glucose- $\alpha$ -phosphate isomerase                                                | 825                        | 63107              | 6.43            | 54                           | 37                                       | 16                             | 7                                          | 16                                    | 0.55                           | 0.81  |
| EST1_HUMAN           | S-60methylglutathione synthase                                                        | 817                        | 31442              | 6.54            | 34                           | 22                                       | 12                             | 7                                          | 12                                    | 0.73                           | 1.52  |
| PSMD1_HUMAN          | 26S proteasome non-ATPase regulatory subunit 2                                        | 809                        | 100136             | 5.08            | 42                           | 25                                       | 21                             | 16                                         | 21                                    | 0.45                           | 0.95  |
| GNAH1_HUMAN          | Neutral $\alpha$ -glucosidase AB                                                      | 784                        | 108807             | 5.74            | 70                           | 40                                       | 28                             | 17                                         | 28                                    | 0.57                           | 0.95  |
| NMT1_HUMAN           | N-methyltransferase                                                                   | 782                        | 29555              | 5.56            | 41                           | 34                                       | 19                             | 9                                          | 10                                    | 0.66                           | 3.88  |
| CATD_HUMAN           | Cathepsin D                                                                           | 782                        | 44524              | 6.1             | 64                           | 37                                       | 13                             | 9                                          | 13                                    | 0.54                           | 1.55  |
| OKAP1_HUMAN          | Cytoskeleton-associated protein-4                                                     | 788                        | 65983              | 5.83            | 50                           | 26                                       | 16                             | 11                                         | 16                                    | 0.36                           | 1.01  |

<sup>a</sup>Protein score is calculated from the score of the peptide attributed to the protein.  
<sup>b</sup>pI is (Predicted) isoelectric point.  
<sup>c</sup>Number of matches is spectrum number matched to protein<sup>1</sup>.  
<sup>d</sup>Number of significant matches is spectrum number that matches protein and exceeds the identification criteria.  
<sup>e</sup>Number of sequences is number of peptides matched to protein<sup>2</sup>.  
<sup>f</sup>Number of significant sequences is number of peptides exceeding the identification criteria matched to proteins.  
<sup>g</sup>Number of unique sequences is a unique<sup>3</sup> number of peptides matched to proteins.  
<sup>h</sup>Sequence coverage is the ratio of the total number of matched peptide residues to the total length of the protein.  
<sup>i</sup>Experimentally Modified Protein Abundance Index ([http://www.matrixscience.com/help/quant\\_empai\\_help.html](http://www.matrixscience.com/help/quant_empai_help.html)).

**Table S1. Cont 1**

| UniProt/Swiss-Prot ID | Description                                                               | Protein score <sup>a</sup> | Protein mass (kDa) | pI <sup>a</sup> | Num. of matches <sup>a</sup> | Num. of significant matches <sup>a</sup> | Num. of sequences <sup>a</sup> | Num. of significant sequences <sup>a</sup> | Num. of unique sequences <sup>a</sup> | Sequence coverage <sup>a</sup> | emPAI |
|-----------------------|---------------------------------------------------------------------------|----------------------------|--------------------|-----------------|------------------------------|------------------------------------------|--------------------------------|--------------------------------------------|---------------------------------------|--------------------------------|-------|
| SAP1L1.HUMAN          | Presenilin 6                                                              | 774                        | 581.4              | 5.9             | 35                           | 24                                       | 17                             | 12                                         | 12                                    | 0.61                           | 1.37  |
| EF1A1.HUMAN           | Elongation factor 1-gamma                                                 | 772                        | 50.87              | 6.25            | 61                           | 30                                       | 17                             | 12                                         | 12                                    | 0.61                           | 1.71  |
| PRH4.HUMAN            | Prd4-1/epsilon subunit alpha-1                                            | 770                        | 60.84              | 5.99            | 30                           | 24                                       | 18                             | 12                                         | 12                                    | 0.36                           | 0.98  |
| LRP1.HUMAN            | Protein-Low-density lipoprotein receptor-related protein 1                | 763                        | 50427.6            | 5.16            | 76                           | 40                                       | 37                             | 21                                         | 17                                    | 0.19                           | 0.62  |
| TOP2A.HUMAN           | Topoisomerase (DNA) subunit alpha                                         | 762                        | 59.633             | 5.45            | 46                           | 30                                       | 13                             | 8                                          | 13                                    | 0.49                           | 0.88  |
| CPNS1.HUMAN           | Oblastin subunit 1                                                        | 755                        | 28398              | 5.05            | 26                           | 10                                       | 10                             | 7                                          | 7                                     | 0.18                           | 0.79  |
| MOES1.HUMAN           | Moesin                                                                    | 741                        | 67.778             | 6.08            | 68                           | 30                                       | 24                             | 11                                         | 12                                    | 0.53                           | 0.97  |
| IFM2.HUMAN            | Isolate dehydrogenase [NADP] cytoplasmic                                  | 733                        | 48.620             | 6.33            | 68                           | 30                                       | 13                             | 8                                          | 12                                    | 0.55                           | 0.97  |
| PP2C.HUMAN            | Farnesyltransferase [NADP]                                                | 735                        | 24.42              | 6.83            | 32                           | 24                                       | 8                              | 8                                          | 8                                     | 0.47                           | 1.17  |
| HRP23.HUMAN           | Heterogeneous nuclear ribonucleoprotein K                                 | 731                        | 50.944             | 5.39            | 35                           | 21                                       | 12                             | 9                                          | 12                                    | 0.42                           | 1.27  |
| YIN1A.HUMAN           | Yin1alpha                                                                 | 728                        | 6.5                | 12332.2         | 5.2                          | 26                                       | 30                             | 12                                         | 12                                    | 0.36                           | 0.72  |
| PGC1A.HUMAN           | Programmed cell death 1-interacting protein                               | 727                        | 55.963             | 6.13            | 38                           | 20                                       | 12                             | 5                                          | 12                                    | 0.24                           | 0.61  |
| PP2C.HUMAN            | Protein phosphatase 2C isoenzyme B                                        | 715                        | 23738              | 8.42            | 77                           | 40                                       | 12                             | 6                                          | 12                                    | 0.36                           | 2.38  |
| NOW1.HUMAN            | Nucleoside diphosphate kinase B                                           | 714                        | 71.62              | 6.52            | 65                           | 25                                       | 25                             | 12                                         | 12                                    | 0.37                           | 0.87  |
| NDPK1.HUMAN           | Nucleoside diphosphate kinase A                                           | 706                        | 17.128             | 5.83            | 86                           | 23                                       | 9                              | 7                                          | 5                                     | 0.78                           | 5.83  |
| NEP.HUMAN             | Neuronal                                                                  | 706                        | 65.440             | 6.54            | 44                           | 22                                       | 12                             | 12                                         | 12                                    | 0.43                           | 0.83  |
| SYO1.HUMAN            | Isoenzyme-1 RNAase A6, cytoplasmic                                        | 700                        | 144.008            | 5.82            | 69                           | 38                                       | 27                             | 14                                         | 27                                    | 0.37                           | 0.55  |
| UOCH1.HUMAN           | UO-glucose 6-epimerase                                                    | 696                        | 54.989             | 6.73            | 40                           | 27                                       | 19                             | 14                                         | 17                                    | 0.61                           | 1.89  |
| 6P0D.HUMAN            | Emulphatorin, cytoplasmic, deacetylating                                  | 691                        | 531.006            | 6.4             | 32                           | 14                                       | 12                             | 5                                          | 12                                    | 0.36                           | 0.72  |
| PGS1A.HUMAN           | Protein disulfide-isomerase A6                                            | 689                        | 60.911             | 4.95            | 50                           | 33                                       | 13                             | 12                                         | 11                                    | 0.56                           | 2.08  |
| GOIN1.HUMAN           | gO1-2-4-like kinase activator (GDI)                                       | 682                        | 29.972             | 7.29            | 40                           | 20                                       | 10                             | 10                                         | 10                                    | 0.12                           | 0.15  |
| OST4L.HUMAN           | OSTF-1-like subunit of phosphatase-2                                      | 680                        | 507.948            | 6.30            | 18                           | 6                                        | 6                              | 6                                          | 6                                     | 0.19                           | 0.64  |
| CD132.HUMAN           | Cytosolic dymin 1 intermediate chain 2                                    | 679                        | 71.412             | 5.08            | 30                           | 25                                       | 10                             | 4                                          | 4                                     | 0.2                            | 0.94  |
| 2A4A.HUMAN            | Serine threonine phosphatase 2A 65 kDa regulatory subunit A alpha isoform | 678                        | 65.627             | 6.07            | 30                           | 13                                       | 10                             | 12                                         | 12                                    | 0.36                           | 1.07  |
| ANKK1.HUMAN           | Ankrrin 6                                                                 | 677                        | 72.828             | 5.42            | 40                           | 20                                       | 15                             | 16                                         | 16                                    | 0.43                           | 0.94  |
| SPY1.HUMAN            | Esperto-2                                                                 | 667                        | 110.448            | 5.51            | 32                           | 20                                       | 14                             | 10                                         | 14                                    | 0.29                           | 0.52  |
| TOP2A.HUMAN           | Topoisomerase (DNA) subunit alpha                                         | 667                        | 60.296             | 5.8             | 17                           | 18                                       | 10                             | 10                                         | 10                                    | 0.36                           | 0.96  |
| GBF1.HUMAN            | Guanine nucleotide-binding protein subunit beta-4                         | 641                        | 37.543             | 5.6             | 11                           | 3                                        | 7                              | 2                                          | 4                                     | 0.22                           | 0.25  |
| TOP2A.HUMAN           | Topoisomerase (DNA) subunit alpha                                         | 639                        | 59.239             | 5.8             | 22                           | 14                                       | 16                             | 16                                         | 16                                    | 0.48                           | 1.17  |
| SVEP1.HUMAN           | Bifunctional diacylglycerol/phospho-inositol-3-OH kinase                  | 631                        | 170.483            | 7.02            | 60                           | 37                                       | 24                             | 11                                         | 24                                    | 0.31                           | 0.51  |
| SHJ1.HUMAN            | Shal1-associated nuclear domain-containing protein 1                      | 630                        | 101.034            | 6.74            | 49                           | 25                                       | 16                             | 13                                         | 16                                    | 0.36                           | 0.85  |
| ALAI1.HUMAN           | Artemin-like fibroblast growth factor 1                                   | 629                        | 53.767             | 5.49            | 20                           | 7                                        | 12                             | 7                                          | 7                                     | 0.27                           | 0.87  |
| COH1A1.HUMAN          | Coilin alpha-2/3 chain                                                    | 627                        | 129.035            | 6.08            | 50                           | 30                                       | 10                             | 16                                         | 16                                    | 0.24                           | 0.38  |
| HSP70.HUMAN           | Heat shock 70 kDa protein                                                 | 618                        | 70.421             | 5.11            | 33                           | 29                                       | 23                             | 18                                         | 15                                    | 0.48                           | 0.89  |
| RBBP1.HUMAN           | Reb-binding protein 1                                                     | 614                        | 12.821             | 5.09            | 17                           | 22                                       | 18                             | 17                                         | 17                                    | 0.18                           | 0.28  |
| CLIC1.HUMAN           | Chloride intracellular channel protein 1                                  | 612                        | 28.606             | 5.09            | 68                           | 30                                       | 12                             | 9                                          | 11                                    | 0.63                           | 3     |
| IPOL1.HUMAN           | Importin-5                                                                | 609                        | 123.550            | 4.83            | 44                           | 23                                       | 27                             | 14                                         | 24                                    | 0.45                           | 0.61  |
| PIYU1.HUMAN           | Glucose phosphorylase, brain form                                         | 602                        | 98.935             | 6.4             | 31                           | 16                                       | 8                              | 13                                         | 12                                    | 0.28                           | 0.40  |
| TRFE1.HUMAN           | Serine/threonine                                                          | 600                        | 7.914              | 6.81            | 42                           | 19                                       | 15                             | 8                                          | 8                                     | 0.32                           | 0.54  |
| RC3H1.HUMAN           | Retinoid-inducible                                                        | 594                        | 37.470             | 4.74            | 27                           | 17                                       | 10                             | 8                                          | 8                                     | 0.45                           | 0.74  |
| SWO1.HUMAN            | Tryptophan-5 RNAase, cytoplasmic                                          | 586                        | 53.132             | 5.83            | 20                           | 12                                       | 8                              | 5                                          | 8                                     | 0.31                           | 0.48  |
| PGS1A.HUMAN           | Protein disulfide-isomerase A6                                            | 584                        | 72.887             | 4.96            | 13                           | 16                                       | 19                             | 2                                          | 16                                    | 0.38                           | 0.86  |
| TOP2A.HUMAN           | Topoisomerase (DNA) subunit alpha                                         | 573                        | 57.888             | 7.96            | 40                           | 24                                       | 15                             | 12                                         | 15                                    | 0.53                           | 1.55  |
| ANKK1.HUMAN           | Neurokinin differentiation-associated protein ANKRR1                      | 572                        | 72.689             | 5.8             | 84                           | 33                                       | 56                             | 30                                         | 56                                    | 0.71                           | 0.22  |
| MTF1.HUMAN            | Metformin-binding                                                         | 563                        | 60.7               | 5.63            | 20                           | 1                                        | 2                              | 2                                          | 2                                     | 0.23                           | 0.35  |
| SWO1.HUMAN            | Serine-5 RNAase, cytoplasmic                                              | 556                        | 58.740             | 6.55            | 30                           | 25                                       | 8                              | 6                                          | 6                                     | 0.33                           | 0.64  |
| ECM1.HUMAN            | Erythrocyte hemoglobin                                                    | 554                        | 31.387             | 8.34            | 25                           | 7                                        | 7                              | 7                                          | 7                                     | 0.44                           | 7     |
| AT1A1.HUMAN           | Sodium potassium-transporting ATPase subunit alpha-1                      | 553                        | 106.318            | 6.33            | 29                           | 25                                       | 11                             | 10                                         | 10                                    | 0.18                           | 0.24  |
| EIFK1.HUMAN           | Eukaryotic translation initiation factor 3 subunit K                      | 557                        | 25.943             | 4.81            | 14                           | 13                                       | 4                              | 3                                          | 4                                     | 0.45                           | 0.64  |
| ITP1.HUMAN            | Integrin beta-1                                                           | 557                        | 83.557             | 5.27            | 16                           | 10                                       | 13                             | 6                                          | 6                                     | 0.32                           | 0.42  |
| PSME2.HUMAN           | Protein activator                                                         | 554                        | 27.084             | 5.54            | 28                           | 16                                       | 6                              | 6                                          | 6                                     | 0.4                            | 1.47  |
| COG2.HUMAN            | Coilin alpha-2/3 chain                                                    | 552                        | 108.512            | 5.85            | 34                           | 22                                       | 14                             | 13                                         | 14                                    | 0.25                           | 0.72  |
| PAH1A1.HUMAN          | Prd4-1/epsilon subunit alpha-1                                            | 548                        | 61.911             | 5.27            | 48                           | 25                                       | 18                             | 11                                         | 11                                    | 0.36                           | 0.95  |
| UOCH1.HUMAN           | UO-glucose 6-epimerase                                                    | 547                        | 17.7078            | 5.42            | 37                           | 22                                       | 19                             | 11                                         | 19                                    | 0.28                           | 0.23  |
| GAPDH.HUMAN           | Glyceraldehyde-3-phosphate dehydrogenase                                  | 542                        | 36.2               | 8.24            | 6                            | 23                                       | 23                             | 8                                          | 23                                    | 0.45                           | 1.13  |
| MDM1.HUMAN            | Mad1 domain-containing protein                                            | 537                        | 45.841             | 8.92            | 32                           | 21                                       | 13                             | 7                                          | 11                                    | 0.52                           | 1.27  |
| TH1A1.HUMAN           | Acetyl-CoA acetyltransferase, cytosolic                                   | 533                        | 33.224             | 6.47            | 20                           | 19                                       | 7                              | 6                                          | 7                                     | 0.47                           | 1.02  |
| ABP1.HUMAN            | Actin-binding protein 2/2 complex subunit 2                               | 532                        | 34.111             | 5.27            | 48                           | 25                                       | 11                             | 11                                         | 11                                    | 0.26                           | 0.31  |
| DDX3X.HUMAN           | ATP-dependent RNA helicase DDX3X                                          | 528                        | 73.198             | 6.73            | 27                           | 18                                       | 6                              | 6                                          | 6                                     | 0.18                           | 0.26  |
| GAPDH.HUMAN           | Glucose-6-phosphate dehydrogenase                                         | 524                        | 39.919             | 6.39            | 35                           | 21                                       | 12                             | 8                                          | 12                                    | 0.43                           | 0.76  |
| CA1X.HUMAN            | Calnexin                                                                  | 516                        | 67.526             | 4.37            | 55                           | 22                                       | 12                             | 8                                          | 8                                     | 0.4                            | 0.64  |
| AP1.HUMAN             | Adenosine phosphoribosyltransferase                                       | 515                        | 10.955             | 5.78            | 13                           | 11                                       | 4                              | 4                                          | 4                                     | 0.49                           | 1.21  |
| SYA1A.HUMAN           | Aluminum-3 RNAase, cytoplasmic                                            | 514                        | 106.143            | 5.64            | 26                           | 17                                       | 14                             | 7                                          | 14                                    | 0.33                           | 0.68  |
| GA2.HUMAN             | Guanine nucleotide-binding protein G12 subunit alpha-2                    | 517                        | 40.225             | 5.34            | 21                           | 11                                       | 10                             | 5                                          | 6                                     | 0.41                           | 0.67  |
| MYO1F.HUMAN           | Myofibrin                                                                 | 510                        | 23.461             | 5.84            | 81                           | 29                                       | 28                             | 15                                         | 28                                    | 0.36                           | 0.33  |
| PSMD1.HUMAN           | 26S proteasome non-ATPase regulatory subunit 1                            | 505                        | 105.769            | 5.25            | 31                           | 16                                       | 24                             | 8                                          | 24                                    | 0.33                           | 0.49  |
| SPTNL1.HUMAN          | Spectrin alpha class, non-erythrocytic 1                                  | 496                        | 24.844             | 5.22            | 37                           | 22                                       | 19                             | 19                                         | 19                                    | 0.16                           | 0.14  |
| PARK1.HUMAN           | Proteinase nuclear acidic deubiquitinase 1                                | 493                        | 1.9176             | 6.33            | 13                           | 8                                        | 6                              | 6                                          | 6                                     | 0.72                           | 3.27  |
| ZYX.HUMAN             | Zyxin                                                                     | 494                        | 61.238             | 6.27            | 36                           | 14                                       | 8                              | 4                                          | 8                                     | 0.24                           | 0.31  |
| CAN1.HUMAN            | Canalicular                                                               | 490                        | 61.838             | 5.49            | 30                           | 17                                       | 13                             | 9                                          | 13                                    | 0.41                           | 0.50  |
| HRP23.HUMAN           | Heterogeneous nuclear ribonucleoprotein U                                 | 488                        | 50.928             | 4.68            | 38                           | 20                                       | 9                              | 9                                          | 9                                     | 0.35                           | 0.83  |
| XRG1.HUMAN            | X-ray repair cross-complementing protein 5                                | 483                        | 82.852             | 5.55            | 51                           | 24                                       | 15                             | 11                                         | 15                                    | 0.49                           | 0.74  |
| HRP23.HUMAN           | Heterogeneous nuclear ribonucleoprotein U                                 | 479                        | 56.381             | 5.89            | 29                           | 19                                       | 11                             | 8                                          | 10                                    | 0.54                           | 1.76  |
| EIF2.HUMAN            | Elongation factor 1-beta                                                  | 476                        | 21.103             | 4.3             | 19                           | 47                                       | 8                              | 8                                          | 8                                     | 0.4                            | 1.23  |
| HRP23.HUMAN           | Heterogeneous nuclear ribonucleoprotein U                                 | 476                        | 22.168             | 5.98            | 55                           | 32                                       | 9                              | 7                                          | 9                                     | 0.71                           | 2.56  |
| CHOP1.HUMAN           | Cytosolic non-specific lipoprotein                                        | 471                        | 52.845             | 5.46            | 26                           | 14                                       | 14                             | 7                                          | 14                                    | 0.29                           | 0.37  |
| SC23A.HUMAN           | Protein transport protein SC23A                                           | 469                        | 86.015             | 6.44            | 28                           | 15                                       | 14                             | 7                                          | 14                                    | 0.41                           | 0.84  |
| GALL1.HUMAN           | Galactin                                                                  | 389                        | 37.084             | 4.47            | 45                           | 18                                       | 14                             | 10                                         | 14                                    | 0.8                            | 2.07  |
| DHES1.HUMAN           | Dihydroxyacetone dehydrogenase 1, mitochondrial                           | 461                        | 61.359             | 7.48            | 20                           | 10                                       | 9                              | 4                                          | 9                                     | 0.23                           | 0.3   |
| TRPM1.HUMAN           | Transient receptor potential subunit 1                                    | 460                        | 28.504             | 4.87            | 38                           | 20                                       | 12                             | 6                                          | 6                                     | 0.34                           | 0.19  |
| SYO1.HUMAN            | Serine-5 RNAase                                                           | 451                        | 140.887            | 6.3             | 20                           | 12                                       | 12                             | 12                                         | 12                                    | 0.31                           | 0.21  |
| LAMB1.HUMAN           | Lamin subunit 1                                                           | 454                        | 197.909            | 4.83            | 33                           | 25                                       | 18                             | 8                                          | 11                                    | 0.14                           | 0.21  |
| EIF1.HUMAN            | Elongation factor 1-beta                                                  | 452                        | 24.748             | 4.5             | 28                           | 18                                       | 9                              | 7                                          | 4                                     | 0.55                           | 4.31  |
| NEL1.HUMAN            | Nucleosome protein 1                                                      | 449                        | 64.805             | 5.82            | 28                           | 17                                       | 16                             | 8                                          | 13                                    | 0.42                           | 0.33  |
| ALIL2.HUMAN           | Alcohol dehydrogenase 1/2-formyltransferase dehydrogenase                 | 449                        | 101.681            | 6.13            | 19                           | 13                                       | 13                             | 5                                          | 9                                     | 0.21                           | 0.23  |
| PSB1.HUMAN            | Proteinase subunit beta type-1                                            | 440                        | 29.946             | 7.57            | 10                           | 9                                        | 2                              | 2                                          | 2                                     | 0.17                           | 0.22  |
| ABCT1.HUMAN           | Adenosine nucleoside triphosphate 2/2 complex subunit 1B                  | 438                        | 40.923             | 4.39            | 15                           | 15                                       | 9                              | 9                                          | 9                                     | 0.26                           | 0.68  |
| NEL1.HUMAN            | Nucleosome protein subunit beta-1                                         | 365                        | 75.568             | 4.6             | 14                           | 12                                       | 4                              | 4                                          | 4                                     | 0.4                            | 0.74  |
| CPBP1.HUMAN           | CPBP1 complex subunit beta-1                                              | 365                        | 104.070            | 5.84            | 4                            | 10                                       | 17                             | 6                                          | 6                                     | 0.32                           | 0.2   |
| CPBP1.HUMAN           | Poly(ADP-ribose) binding protein 2                                        | 249                        | 38.556             | 6.33            | 42                           | 19                                       | 9                              | 5                                          | 5                                     | 0.43                           | 0.72  |
| ERL1.HUMAN            | Erythrocyte membrane-anchoring receptor 3                                 | 166                        | 25.010             | 8.87            | 10                           | 7                                        | 3                              | 3                                          | 2                                     | 0.22                           | 0.74  |
| LRP2.HUMAN            | Low-density lipoprotein receptor 2                                        | 21829                      | 9.96               | 2.1             | 15                           | 15                                       | 15                             | 15                                         | 15                                    | 0.53                           | 0.55  |
| CLIC1.HUMAN           | Chloride intracellular channel protein 1                                  | 429                        | 28.754             | 5.45            | 39                           | 17                                       | 12                             | 7                                          | 11                                    | 0.64                           | 1.74  |
| TOP2A.HUMAN           | Topoisomerase (DNA) subunit alpha                                         | 611                        | 60.495             | 5.1             | 14                           | 15                                       | 15                             | 15                                         | 15                                    | 0.54                           | 0.74  |
| SEPR.HUMAN            | Protein disulfide-isomerase FAP                                           | 425                        | 27.857             | 6.21            | 29                           | 19                                       | 13                             | 9                                          | 13                                    | 0.35                           | 0.54  |
| PSB1.HUMAN            | Proteinase subunit beta type-1                                            | 421                        | 29.955             | 7.72            | 15                           | 9                                        | 5                              | 3                                          | 5                                     | 0.36                           | 0.53  |
| UOCH1.HUMAN           | UO-glucose 6-epimerase                                                    | 423                        | 14.008             | 5.43            | 26                           | 25                                       | 9                              | 9                                          | 9                                     | 0.45                           | 2.4   |
| MAP1B.HUMAN           | Microtubule-associated protein 1B                                         | 407                        | 27.048             | 4.73            | 29                           | 16                                       | 17                             | 11                                         | 17                                    | 0.15                           | 0.19  |
| SYO1.HUMAN            | Serine-5 RNAase                                                           | 407                        | 17.374             | 5.72            | 15                           | 9                                        | 9                              | 9                                          | 9                                     | 0.3                            | 0.24  |
| SYO1.HUMAN            | Serine-5 RNAase                                                           | 406                        | 27.548             | 5.72            | 15                           | 9                                        | 9                              | 9                                          | 9                                     | 0.48                           | 0.24  |

<sup>a</sup>Protein score is calculated from the score of the peptide attributed to the protein

<sup>b</sup>pI is (Predicted) isoelectric point.

<sup>c</sup>Number of matches is spectrum number matched to protein<sup>47)</sup>

<sup>d</sup>Number of significant matches is spectrum number that matches protein and exceeds the identification criteria.

<sup>a</sup>Number of sequences is number of peptides matched to protein.<sup>82</sup>

<sup>f</sup>Number of significant sequences is number of peptides exceeding the identification

<sup>2</sup>Number of unique sequences is a unique<sup>43</sup> number of peptides matched to proteins.

<sup>b</sup>Sequence coverage is the ratio of the total number of matched peptide residues to the total length of the protein

<sup>1</sup>Exponentially Modified Protein Abundance Index ([http://www.matrixscience.com/help/quant\\_email\\_help.html](http://www.matrixscience.com/help/quant_email_help.html))

Exponentially Modified Protein Abundance Index ([http://www.matrixscience.com/help/quant\\_help.html](http://www.matrixscience.com/help/quant_help.html)).



Table S1, Cont.2.

| UniProt/Swiss-Prot ID | Description                                                          | Protein score <sup>1</sup> | Protein mass (kDa) | pI <sup>2</sup> | Num. of matches <sup>1</sup> | Num. of significant matches <sup>1</sup> | Num. of sequences <sup>1</sup> | Num. of significant sequences <sup>1</sup> | Num. of unique sequences <sup>1</sup> | Sequence coverage <sup>3</sup> | emPAI <sup>4</sup> |
|-----------------------|----------------------------------------------------------------------|----------------------------|--------------------|-----------------|------------------------------|------------------------------------------|--------------------------------|--------------------------------------------|---------------------------------------|--------------------------------|--------------------|
| TOP2B2_HUMAN          | Topoisomerase (beta) subunit theta                                   | 403                        | 39583              | 5.42            | 26                           | 13                                       | 12                             | 7                                          | 12                                    | 0.34                           | 0.63               |
| FERM3_HUMAN           | Fermitin family domain 2                                             | 400                        | 77811              | 6.26            | 20                           | 12                                       | 5                              | 7                                          | 7                                     | 0.23                           | 0.31               |
| ADRH_HUMAN            | Alcohol dehydrogenase class 3                                        | 399                        | 39898              | 7.45            | 22                           | 14                                       | 8                              | 7                                          | 8                                     | 0.51                           | 1.31               |
| PLD5_HUMAN            | Phospholipase 2-oxoglutarate 5-acyltransferase 1                     | 396                        | 83497              | 6.47            | 32                           | 16                                       | 12                             | 7                                          | 12                                    | 0.49                           | 0.94               |
| PLD2_HUMAN            | Phospholipase 2-oxoglutarate 5-acyltransferase 2                     | 262                        | 84632              | 6.24            | 19                           | 4                                        | 7                              | 4                                          | 4                                     | 0.16                           | 0.22               |
| PLD3_HUMAN            | Phospholipase 2-oxoglutarate 5-acyltransferase 3                     | 231                        | 84731              | 5.69            | 19                           | 12                                       | 8                              | 6                                          | 8                                     | 0.2                            | 0.48               |
| UAP1_HUMAN            | UDP-glucose 4-epimerase pyrophosphatase                              | 385                        | 58732              | 5.92            | 27                           | 11                                       | 10                             | 5                                          | 10                                    | 0.31                           | 0.63               |
| PROX1_HUMAN           | Peroxiredoxin-1                                                      | 384                        | 22096              | 6.27            | 57                           | 25                                       | 13                             | 6                                          | 10                                    | 0.75                           | 2.07               |
| PROX4_HUMAN           | Peroxiredoxin-4                                                      | 370                        | 30521              | 5.98            | 29                           | 14                                       | 12                             | 6                                          | 10                                    | 0.65                           | 1.26               |
| PROX2_HUMAN           | Peroxiredoxin-2                                                      | 284                        | 21878              | 5.66            | 18                           | 12                                       | 5                              | 5                                          | 4                                     | 0.78                           | 1.57               |
| PFKFB_HUMAN           | ATP-dependent 6-phosphofructokinase, dimeric type                    | 380                        | 85542              | 7.5             | 28                           | 20                                       | 14                             | 12                                         | 13                                    | 0.41                           | 0.8                |
| PFKA_HUMAN            | ATP-dependent 6-phosphofructokinase, liver type                      | 325                        | 84964              | 7.26            | 16                           | 11                                       | 9                              | 7                                          | 8                                     | 0.27                           | 0.49               |
| COPA_HUMAN            | Cotinine subunit alpha                                               | 388                        | 138258             | 7.7             | 42                           | 19                                       | 24                             | 11                                         | 24                                    | 0.35                           | 0.4                |
| VDAC1_HUMAN           | Voltage-dependent anion-selective channel protein 1                  | 385                        | 30754              | 8.82            | 10                           | 9                                        | 7                              | 6                                          | 7                                     | 0.43                           | 1.25               |
| BZW1_HUMAN            | Basic leucine zipper and W2 domain-containing protein 1              | 383                        | 46013              | 5.75            | 24                           | 15                                       | 11                             | 6                                          | 11                                    | 0.38                           | 0.88               |
| VAT1_HUMAN            | Synaptic vesicle membrane protein VAT-1 homolog                      | 374                        | 41893              | 5.88            | 40                           | 18                                       | 14                             | 9                                          | 14                                    | 0.54                           | 1.45               |
| PTBP1_HUMAN           | Polypyrimidine tract-binding protein 1                               | 374                        | 57108              | 9.22            | 19                           | 12                                       | 8                              | 5                                          | 8                                     | 0.38                           | 0.44               |
| PSH1_HUMAN            | Protein S-lysoxide 1                                                 | 371                        | 83241              | 5.05            | 36                           | 21                                       | 13                             | 7                                          | 13                                    | 0.41                           | 0.57               |
| YBX3_HUMAN            | Y-box-binding protein 3                                              | 126                        | 40066              | 9.77            | 8                            | 5                                        | 5                              | 3                                          | 3                                     | 0.23                           | 0.37               |
| COR1C2_HUMAN          | Coronin-1C                                                           | 370                        | 53215              | 6.65            | 26                           | 14                                       | 7                              | 6                                          | 7                                     | 0.36                           | 0.73               |
| ROD3B_HUMAN           | UV excision repair protein RAD23 homolog B                           | 367                        | 43145              | 4.79            | 17                           | 13                                       | 7                              | 6                                          | 7                                     | 0.33                           | 0.78               |
| ALDO_HUMAN            | Aldehyde reductase                                                   | 364                        | 35830              | 6.51            | 23                           | 13                                       | 7                              | 3                                          | 7                                     | 0.5                            | 0.42               |
| PRH1_HUMAN            | Protein phosphatase 1 regulatory subunit 7                           | 364                        | 41538              | 4.84            | 15                           | 11                                       | 7                              | 4                                          | 7                                     | 0.27                           | 0.65               |
| MKG1_HUMAN            | Mitogen-activated protein kinase 1                                   | 364                        | 41363              | 6.5             | 18                           | 11                                       | 8                              | 4                                          | 6                                     | 0.48                           | 0.49               |
| CALD1_HUMAN           | Caldesmon                                                            | 363                        | 93175              | 5.82            | 26                           | 12                                       | 8                              | 5                                          | 8                                     | 0.17                           | 0.25               |
| MPT1_HUMAN            | Protein phosphatase 1 regulatory subunit 12A                         | 357                        | 115211             | 5.31            | 10                           | 6                                        | 4                              | 1                                          | 4                                     | 0.06                           | 0.04               |
| CI13BP_HUMAN          | Oxidomycin component 1 G subcomponent-binding protein, mitochondrial | 357                        | 31343              | 4.74            | 22                           | 13                                       | 8                              | 6                                          | 8                                     | 0.46                           | 1.21               |
| ORF1_HUMAN            | Olfactin-1                                                           | 357                        | 33475              | 6.95            | 34                           | 17                                       | 9                              | 7                                          | 8                                     | 0.54                           | 1.37               |
| IPO12_HUMAN           | Importin-7                                                           | 356                        | 118440             | 4.7             | 25                           | 17                                       | 11                             | 7                                          | 11                                    | 0.23                           | 0.23               |
| MYO1C_HUMAN           | Unconventional myosin-1C                                             | 349                        | 121606             | 9.46            | 26                           | 13                                       | 14                             | 7                                          | 14                                    | 0.23                           | 0.27               |
| GNIML1_HUMAN          | Transmembrane glycoprotein NMB                                       | 342                        | 63882              | 6.17            | 23                           | 13                                       | 5                              | 5                                          | 5                                     | 0.32                           | 0.98               |
| XRCO3_HUMAN           | X-ray repair cross-complementing protein 6                           | 342                        | 69799              | 6.23            | 39                           | 25                                       | 11                             | 7                                          | 11                                    | 0.23                           | 0.52               |
| FUM1_HUMAN            | Fumarate hydratase, mitochondrial                                    | 341                        | 54602              | 8.85            | 21                           | 12                                       | 8                              | 6                                          | 8                                     | 0.33                           | 0.84               |
| PAPS3_HUMAN           | Bifunctional 3'-phosphoadenosine 3'-phosphosulfate synthase 2        | 338                        | 69457              | 6.18            | 20                           | 12                                       | 6                              | 9                                          | 2                                     | 0.42                           | 0.18               |
| CAVIN1_HUMAN          | Caveolin-associated protein 1                                        | 336                        | 43450              | 5.51            | 11                           | 10                                       | 6                              | 5                                          | 6                                     | 0.25                           | 0.62               |
| PSP1_HUMAN            | Phosphatidylethanolamine-binding protein 1                           | 335                        | 21044              | 7.01            | 31                           | 13                                       | 9                              | 5                                          | 12                                    | 0.24                           | 0.59               |
| SCOR3_HUMAN           | Lysosome membrane protein 2                                          | 334                        | 54255              | 5               | 10                           | 7                                        | 5                              | 3                                          | 5                                     | 0.21                           | 0.26               |
| SC11A_HUMAN           | Protein transport protein Sec23A                                     | 334                        | 132931             | 6.43            | 23                           | 14                                       | 13                             | 8                                          | 13                                    | 0.22                           | 0.29               |
| XPO1_HUMAN            | Exportin-1                                                           | 333                        | 123306             | 5.71            | 25                           | 14                                       | 12                             | 8                                          | 12                                    | 0.25                           | 0.31               |
| IF4G1_HUMAN           | Eukaryotic translation initiation factor 4 gamma 1                   | 331                        | 175382             | 5.25            | 36                           | 18                                       | 14                             | 8                                          | 14                                    | 0.18                           | 0.21               |
| MBO1_HUMAN            | Malate dehydrogenase, cytosolic                                      | 329                        | 36403              | 6.91            | 41                           | 18                                       | 11                             | 8                                          | 11                                    | 0.6                            | 1.79               |
| POST1_HUMAN           | Postnecin                                                            | 328                        | 83255              | 7.27            | 21                           | 12                                       | 7                              | 9                                          | 2                                     | 0.43                           | 0.27               |
| IF4A_HUMAN            | Eukaryotic translation initiation factor 2 subunit 1                 | 328                        | 36089              | 5.02            | 12                           | 10                                       | 6                              | 5                                          | 6                                     | 0.38                           | 1                  |
| LRRC1_HUMAN           | Leucine-rich repeat-containing protein 59                            | 326                        | 34009              | 5.61            | 11                           | 6                                        | 5                              | 2                                          | 5                                     | 0.22                           | 0.61               |
| TAGLN_HUMAN           | Transgelin                                                           | 323                        | 22596              | 8.87            | 39                           | 18                                       | 10                             | 5                                          | 10                                    | 0.6                            | 1.49               |
| GLYTH1_HUMAN          | Serine hydroxymethyltransferase, mitochondrial                       | 323                        | 55958              | 8.76            | 14                           | 11                                       | 6                              | 4                                          | 6                                     | 0.27                           | 0.36               |
| DREL1_HUMAN           | Drelin                                                               | 323                        | 71385              | 4.41            | 15                           | 13                                       | 5                              | 4                                          | 5                                     | 0.18                           | 0.26               |
| SEPT2_HUMAN           | Septin-2                                                             | 323                        | 41461              | 6.15            | 20                           | 14                                       | 10                             | 7                                          | 9                                     | 0.51                           | 1.02               |
| RLR1_HUMAN            | 6S acidic ribosomal protein P0                                       | 321                        | 34252              | 5.71            | 26                           | 11                                       | 8                              | 4                                          | 8                                     | 0.44                           | 0.68               |
| ERO1A_HUMAN           | ERO-1-like protein alpha                                             | 320                        | 54368              | 5.46            | 23                           | 15                                       | 9                              | 6                                          | 9                                     | 0.36                           | 0.71               |
| LAH1_HUMAN            | Lupus La protein                                                     | 315                        | 46808              | 6.68            | 31                           | 13                                       | 8                              | 6                                          | 8                                     | 0.26                           | 0.7                |
| SAR1A_HUMAN           | GTP-binding protein SAR1a                                            | 312                        | 22353              | 6.21            | 12                           | 8                                        | 4                              | 3                                          | 4                                     | 0.17                           | 0.74               |
| ESYT1_HUMAN           | Extended synaptotagmin-1                                             | 310                        | 122780             | 5.57            | 24                           | 14                                       | 14                             | 7                                          | 14                                    | 0.24                           | 0.27               |
| AMEP1_HUMAN           | Aminopeptidase B                                                     | 307                        | 72549              | 5.51            | 28                           | 11                                       | 8                              | 6                                          | 8                                     | 0.31                           | 0.41               |
| PAK2_HUMAN            | Serine/threonine-protein kinase PAK 2                                | 305                        | 58005              | 5.68            | 13                           | 10                                       | 5                              | 4                                          | 5                                     | 0.24                           | 0.63               |
| IF4H_HUMAN            | Eukaryotic translation initiation factor 4H                          | 305                        | 27368              | 6.67            | 20                           | 14                                       | 4                              | 2                                          | 4                                     | 0.38                           | 0.55               |
| CATL1_HUMAN           | Cathepsin L1                                                         | 305                        | 31546              | 5.31            | 12                           | 7                                        | 4                              | 1                                          | 4                                     | 0.29                           | 0.12               |
| SOB1_HUMAN            | Sinterin-1                                                           | 304                        | 35424              | 7.05            | 18                           | 12                                       | 9                              | 8                                          | 9                                     | 0.62                           | 1.78               |
| TMED4_HUMAN           | Transmembrane emp24 domain-containing protein 10                     | 303                        | 24960              | 5.97            | 14                           | 10                                       | 3                              | 3                                          | 3                                     | 0.22                           | 0.64               |
| MOB1B_HUMAN           | MOB1 domain activator 1B                                             | 303                        | 25079              | 6.24            | 8                            | 6                                        | 3                              | 1                                          | 3                                     | 0.1                            | 0.18               |
| NADK2_HUMAN           | Nucleoside-nucleotide pyrophosphorylase [carboxylating]              | 303                        | 30826              | 5.81            | 18                           | 11                                       | 4                              | 4                                          | 4                                     | 0.45                           | 1.24               |
| GFPT1_HUMAN           | Glutamine-nucleoside-diphosphate aminotransferase [isomerizing] 1    | 302                        | 78756              | 6.66            | 22                           | 16                                       | 14                             | 11                                         | 12                                    | 0.36                           | 0.79               |
| GFPT2_HUMAN           | Glutamine-nucleoside-diphosphate aminotransferase [isomerizing] 2    | 230                        | 76882              | 7.03            | 14                           | 11                                       | 9                              | 7                                          | 7                                     | 0.46                           | 0.98               |
| NOO1_HUMAN            | NAD(P)H dehydrogenase [ubiquinol]                                    | 297                        | 30848              | 8.91            | 15                           | 12                                       | 7                              | 4                                          | 7                                     | 0.41                           | 0.96               |
| VBL1_HUMAN            | Vagin                                                                | 295                        | 14388              | 6.43            | 22                           | 10                                       | 13                             | 7                                          | 2                                     | 0.17                           | 0.23               |
| ATPO1_HUMAN           | ATP synthase subunit O, mitochondrial                                | 295                        | 23763              | 9.97            | 6                            | 6                                        | 2                              | 2                                          | 2                                     | 0.18                           | 0.43               |
| AREP1_HUMAN           | ADP-ribosylation factor-like protein 6-interacting protein 1         | 292                        | 23347              | 9.38            | 6                            | 5                                        | 1                              | 1                                          | 1                                     | 0.14                           | 0.19               |
| PROX3_HUMAN           | Peroxiredoxin-3, mitochondrial                                       | 288                        | 22073              | 6.93            | 23                           | 10                                       | 8                              | 6                                          | 8                                     | 0.57                           | 2.07               |
| ASPH1_HUMAN           | Aspartyl (asparaginyl)beta-hydroxylase                               | 288                        | 85809              | 4.82            | 15                           | 5                                        | 5                              | 5                                          | 5                                     | 0.12                           | 0.26               |
| COR1L_HUMAN           | Cotinine subunit beta                                                | 285                        | 107074             | 5.72            | 37                           | 18                                       | 17                             | 10                                         | 17                                    | 0.32                           | 0.48               |
| LRX1A_HUMAN           | Leukotriene A4 hydroxylase                                           | 283                        | 66241              | 6.8             | 11                           | 8                                        | 6                              | 3                                          | 6                                     | 0.2                            | 0.27               |
| DICER1_HUMAN          | 2',5'-bisphosphate-3'-phosphate dependent endonuclease               | 282                        | 36045              | 5.35            | 10                           | 2                                        | 2                              | 2                                          | 2                                     | 0.15                           | 0.41               |
| NEGR1_HUMAN           | NAD(P)-cytochrome b5 reductase 2                                     | 281                        | 34213              | 7.18            | 16                           | 13                                       | 7                              | 6                                          | 7                                     | 0.55                           | 1.07               |
| KOP1_HUMAN            | Adenylate kinase 2, mitochondrial                                    | 281                        | 26481              | 7.67            | 10                           | 10                                       | 4                              | 4                                          | 4                                     | 0.23                           | 0.87               |
| KOP2_HUMAN            | Inhibitor of nuclear factor kappa-B kinase-interacting protein       | 279                        | 39395              | 9.21            | 9                            | 6                                        | 4                              | 2                                          | 4                                     | 0.21                           | 0.24               |
| SHG1_HUMAN            | Endoplasmic reticulum chaperone                                      | 277                        | 41464              | 5.31            | 14                           | 11                                       | 4                              | 3                                          | 4                                     | 0.2                            | 0.49               |
| OSG1_HUMAN            | Golgi apparatus protein 1                                            | 276                        | 134464             | 6.52            | 29                           | 8                                        | 13                             | 5                                          | 13                                    | 0.18                           | 0.17               |
| SRC1_HUMAN            | Src substrate cortactin                                              | 275                        | 61549              | 5.24            | 13                           | 7                                        | 7                              | 4                                          | 7                                     | 0.24                           | 0.31               |
| FBX15_HUMAN           | Putative F-box protein                                               | 274                        | 64064              | 5.36            | 31                           | 9                                        | 13                             | 5                                          | 13                                    | 0.4                            | 0.38               |
| TNKS1_HUMAN           | Thioredoxin domain-containing protein 5                              | 273                        | 47599              | 5.63            | 51                           | 27                                       | 10                             | 5                                          | 10                                    | 0.43                           | 0.55               |
| ECOR1_HUMAN           | Trifunctional enzyme subunit beta, mitochondrial                     | 273                        | 51262              | 9.45            | 26                           | 13                                       | 10                             | 4                                          | 10                                    | 0.49                           | 0.38               |
| PTPR1_HUMAN           | Protein-tyrosine phosphatase 1                                       | 272                        | 35847              | 8.45            | 13                           | 11                                       | 5                              | 4                                          | 5                                     | 0.14                           | 0.78               |
| PORC1_HUMAN           | Membrane-associated progesterone receptor component 1                | 271                        | 21658              | 4.58            | 14                           | 12                                       | 4                              | 4                                          | 4                                     | 0.39                           | 1.14               |
| NOP1_HUMAN            | NAD(P)+-cytochrome P450 reductase                                    | 269                        | 76441              | 5.58            | 12                           | 7                                        | 6                              | 4                                          | 6                                     | 0.2                            | 0.24               |
| COPB2_HUMAN           | Cotinine subunit beta'                                               | 268                        | 102422             | 5.15            | 23                           | 14                                       | 14                             | 8                                          | 14                                    | 0.33                           | 0.39               |
| MYO1B_HUMAN           | Unconventional myosin-b                                              | 265                        | 131922             | 9.43            | 30                           | 13                                       | 17                             | 7                                          | 17                                    | 0.26                           | 0.25               |
| PARV1_HUMAN           | Alphavirus                                                           | 263                        | 42217              | 5.89            | 5                            | 5                                        | 2                              | 2                                          | 2                                     | 0.08                           | 0.22               |
| USO1_HUMAN            | General vesicular transport factor p15                               | 263                        | 107828             | 4.85            | 15                           | 11                                       | 6                              | 4                                          | 6                                     | 0.14                           | 0.21               |
| RLR1B_HUMAN           | 6S acidic ribosomal protein L3                                       | 263                        | 46080              | 10.19           | 21                           | 13                                       | 9                              | 5                                          | 9                                     | 0.34                           | 0.57               |
| CAZA_HUMAN            | F-actin-binding protein subunit alpha-1                              | 263                        | 32992              | 4.45            | 20                           | 17                                       | 8                              | 7                                          | 6                                     | 0.48                           | 1.42               |
| TMPO1_HUMAN           | Transporter-2                                                        | 125                        | 101322             | 4.87            | 11                           | 8                                        | 4                              | 3                                          | 3                                     | 0.14                           | 0.28               |
| PUR1_HUMAN            | Phosphoribosyltransferase, uridine synthase                          | 260                        | 144943             | 5.5             | 12                           | 8                                        | 7                              | 4                                          | 7                                     | 0.13                           | 0.12               |
| SOQR_HUMAN            | Sulfide quinone oxidoreductase, mitochondrial                        | 260                        | 49929              | 9.18            | 14                           | 12                                       | 7                              | 6                                          | 7                                     | 0.22                           | 0.65               |
| ODO1_HUMAN            | 2-oxoglutarate dehydrogenase, mitochondrial                          | 257                        | 115861             | 6.14            | 12                           | 10                                       | 5                              | 3                                          | 5                                     | 0.1                            | 0.11               |
| USP14_HUMAN           | Ubiquitin carboxyl-terminal hydrolase 14                             | 256                        | 56023              | 5.2             | 26                           | 13                                       | 8                              | 5                                          | 8                                     | 0.35                           | 0.56               |
| NP1L1_HUMAN           | Nucleosome assembly protein 1-like 4                                 | 256                        | 42797              | 4.8             | 15                           | 9                                        | 7                              | 4                                          | 7                                     | 0.36                           | 0.47               |
| BZW2_HUMAN            | Basic leucine zipper and W2 domain-containing protein 2              | 256                        | 46132              | 6.26            | 11                           | 8                                        | 5                              | 2                                          | 5                                     | 0.19                           | 0.41               |
| PSD1_HUMAN            | 26S proteasome non-ATPase regulatory subunit 13                      | 254                        | 42918              | 5.53            | 14                           | 10                                       | 6                              | 5                                          | 6                                     | 0.29                           | 0.82               |
| NEU1_HUMAN            | Neuraminidase, mitochondrial                                         | 253                        | 80600              | 6.21            | 24                           | 8                                        | 4                              | 3                                          | 4                                     | 0.13                           | 0.23               |
| EF3F_HUMAN            | Eukaryotic translation initiation factor 3 subunit F                 | 251                        | 37540              | 5.24            | 13                           | 10                                       | 4                              | 4                                          | 4                                     | 0.29                           | 0.74               |

<sup>1</sup>Protein score is calculated from the score of the peptide attributed to the protein.

<sup>2</sup>pI is (Predicted) isoelectric point.

<sup>3</sup>Number of matches is spectrum number matched to protein<sup>1</sup>.

<sup>4</sup>Number of significant matches is spectrum number that matches protein and exceeds the identification criteria.

<sup>5</sup>Number of sequences is number of peptides matched to protein<sup>2</sup>.

<sup>6</sup>Number of significant sequences is number of peptides exceeding the identification criteria matched to proteins.

<sup>7</sup>Number of unique sequences is a unique<sup>6</sup> number of peptides matched to proteins.

<sup>8</sup>Sequence coverage is the ratio of the total number of matched peptide residues to the total length of the protein.

<sup>9</sup>Exponentially Modified Protein Abundance Index ([http://www.matrixscience.com/help/quant\\_empai\\_help.html](http://www.matrixscience.com/help/quant_empai_help.html)).

Table S1, Cont.3.

| UniProt/Swiss-Prot ID | Description                                                        | Protein score <sup>1</sup> | Protein mass (kDa) | pI <sup>2</sup> | Num. of matches <sup>1</sup> | Num. of significant matches <sup>1</sup> | Num. of sequences <sup>1</sup> | Num. of significant sequences <sup>1</sup> | Num. of unique sequences <sup>1</sup> | Sequence coverage <sup>3</sup> | emPAI <sup>4</sup> |
|-----------------------|--------------------------------------------------------------------|----------------------------|--------------------|-----------------|------------------------------|------------------------------------------|--------------------------------|--------------------------------------------|---------------------------------------|--------------------------------|--------------------|
| PI3L_HUMAN            | Purification-sensitive antipeptidase                               | 250                        | 103211             | 5.49            | 18                           | 10                                       | 8                              | 4                                          | 8                                     | 0.18                           | 0.18               |
| LAHC1_HUMAN           | Lamin subunit gamma-1                                              | 248                        | 177489             | 5.01            | 18                           | 11                                       | 14                             | 8                                          | 14                                    | 0.18                           | 0.24               |
| PI3MDL_HUMAN          | 26S proteasome non-ATPase regulatory subunit 6                     | 247                        | 45502              | 5.45            | 10                           | 8                                        | 4                              | 2                                          | 4                                     | 0.17                           | 0.2                |
| PP4HL_HUMAN           | Protein phosphatase 1 regulatory subunit 14B                       | 246                        | 15001              | 4.75            | 19                           | 4                                        | 15                             | 4                                          | 3                                     | 0.19                           | 0.17               |
| LGLL4_HUMAN           | Lactoferrin-like                                                   | 246                        | 20764              | 5.12            | 13                           | 9                                        | 4                              | 3                                          | 4                                     | 0.17                           | 0.81               |
| PDIA5_HUMAN           | Protein disulfide-isomerase A5                                     | 244                        | 59558              | 8.08            | 10                           | 3                                        | 4                              | 1                                          | 4                                     | 0.22                           | 0.07               |
| RLS2_HUMAN            | 60S ribosomal protein L5                                           | 243                        | 34541              | 8.73            | 27                           | 9                                        | 8                              | 3                                          | 8                                     | 0.42                           | 0.44               |
| COMT_HUMAN            | Catechol O-methyltransferase                                       | 243                        | 30018              | 5.26            | 17                           | 12                                       | 7                              | 5                                          | 7                                     | 0.41                           | 1                  |
| GS1Y2_HUMAN           | Citrate synthase, mitochondrial                                    | 242                        | 91980              | 8.45            | 20                           | 16                                       | 7                              | 6                                          | 7                                     | 0.29                           | 0.18               |
| ETPL_HUMAN            | Eukaryotic translation initiation factor 3 subunit O-like protein  | 241                        | 105407             | 5.45            | 7                            | 4                                        | 6                              | 4                                          | 6                                     | 0.18                           | 0.17               |
| TM6SS1_HUMAN          | Transmembrane 6 superfamily member 3                               | 241                        | 67843              | 6.83            | 7                            | 8                                        | 2                              | 1                                          | 2                                     | 0.06                           | 0.06               |
| PRPK_HUMAN            | Phosphoinositide 3-kinase                                          | 240                        | 21801              | 5.56            | 7                            | 6                                        | 1                              | 1                                          | 1                                     | 0.18                           | 0.46               |
| PEPD_HUMAN            | Xaa-Pro dipeptidase                                                | 240                        | 54513              | 5.84            | 10                           | 8                                        | 5                              | 5                                          | 5                                     | 0.24                           | 0.47               |
| COPE_HUMAN            | Cotnamer subunit epsilon                                           | 238                        | 34480              | 4.97            | 16                           | 10                                       | 8                              | 7                                          | 8                                     | 0.57                           | 1.35               |
| APES_HUMAN            | Apoptosis inhibitor 5                                              | 237                        | 58968              | 6.90            | 8                            | 6                                        | 4                              | 2                                          | 4                                     | 0.15                           | 0.15               |
| PROF2_HUMAN           | Protein-2                                                          | 237                        | 15036              | 6.55            | 8                            | 8                                        | 2                              | 2                                          | 2                                     | 0.28                           | 0.73               |
| ROU1_HUMAN            | Ras suppressor protein 1                                           | 236                        | 31521              | 8.57            | 20                           | 13                                       | 5                              | 4                                          | 5                                     | 0.43                           | 0.93               |
| TOT1_HUMAN            | Translationally controlled tumor protein                           | 236                        | 15383              | 4.84            | 12                           | 8                                        | 6                              | 5                                          | 6                                     | 0.44                           | 1.87               |
| CO1L1_HUMAN           | Coactosin-like protein                                             | 233                        | 15935              | 5.54            | 14                           | 10                                       | 5                              | 4                                          | 5                                     | 0.55                           | 1.79               |
| TM6SS2_HUMAN          | Transmembrane 6 superfamily member 2                               | 232                        | 75725              | 7.23            | 11                           | 10                                       | 3                              | 3                                          | 3                                     | 0.12                           | 0.22               |
| ATLA32_HUMAN          | Aldolase-3                                                         | 231                        | 60503              | 5.43            | 19                           | 12                                       | 9                              | 7                                          | 9                                     | 0.37                           | 0.82               |
| ORTAP_HUMAN           | Ornithine-associated protein                                       | 230                        | 46532              | 5.5             | 12                           | 10                                       | 6                              | 5                                          | 5                                     | 0.29                           | 0.58               |
| SCS5_HUMAN            | Endoplasmic reticulum protein SCS5                                 | 86                         | 50348              | 4.68            | 4                            | 2                                        | 2                              | 1                                          | 1                                     | 0.1                            | 0.18               |
| RON_HUMAN             | Retinoblastoma                                                     | 230                        | 38866              | 4.86            | 15                           | 9                                        | 6                              | 3                                          | 6                                     | 0.38                           | 0.38               |
| VATB2_HUMAN           | V-type proton ATPase subunit B, brain isoform                      | 230                        | 36465              | 5.57            | 14                           | 7                                        | 10                             | 5                                          | 10                                    | 0.43                           | 0.45               |
| RLA_HUMAN             | 60S ribosomal protein L8                                           | 230                        | 37708              | 10.39           | 12                           | 9                                        | 4                              | 2                                          | 4                                     | 0.19                           | 0.29               |
| LMF2_HUMAN            | Lease mutation factor 2                                            | 230                        | 78647              | 10.1            | 15                           | 6                                        | 5                              | 4                                          | 5                                     | 0.14                           | 0.23               |
| BICA_HUMAN            | Bikinin reductase A                                                | 230                        | 33407              | 6.06            | 14                           | 10                                       | 5                              | 4                                          | 5                                     | 0.36                           | 0.64               |
| APEX1_HUMAN           | DNA-(apurinic or apyrimidinic site) lyase                          | 229                        | 35532              | 6.33            | 15                           | 11                                       | 5                              | 4                                          | 5                                     | 0.28                           | 0.8                |
| LHO1_HUMAN            | Lysoosomal acid base/cholesterol ester hydrolase                   | 228                        | 45300              | 8.42            | 9                            | 7                                        | 5                              | 4                                          | 5                                     | 0.28                           | 0.44               |
| RGRIP_HUMAN           | Rab3 GTPase-activating protein non-catalytic subunit               | 228                        | 155886             | 5.4             | 12                           | 7                                        | 14                             | 5                                          | 10                                    | 0.29                           | 0.27               |
| PGCS_HUMAN            | Debar-1-oxopropyl-Co-carboxylate synthase                          | 226                        | 87248              | 6.66            | 43                           | 11                                       | 10                             | 5                                          | 10                                    | 0.29                           | 0.27               |
| SCRN1_HUMAN           | Secernin-1                                                         | 226                        | 46353              | 4.68            | 18                           | 13                                       | 6                              | 6                                          | 6                                     | 0.29                           | 0.57               |
| HNRP1_HUMAN           | Heterogeneous nuclear ribonucleoprotein F                          | 225                        | 45642              | 5.38            | 9                            | 4                                        | 9                              | 4                                          | 9                                     | 0.28                           | 0.38               |
| HNRPB_HUMAN           | Heterogeneous nuclear ribonucleoprotein M                          | 225                        | 77464              | 8.84            | 16                           | 9                                        | 6                              | 3                                          | 6                                     | 0.17                           | 0.24               |
| HSP1_HUMAN            | Heat-shock protein 1                                               | 224                        | 21084              | 5.71            | 8                            | 7                                        | 2                              | 2                                          | 2                                     | 0.17                           | 0.22               |
| CD103_HUMAN           | CD103 antigen                                                      | 223                        | 161587             | 5.59            | 17                           | 11                                       | 10                             | 6                                          | 10                                    | 0.15                           | 0.2                |
| COA1_HUMAN            | CoA-pyruvate lyase (D) chain                                       | 220                        | 138479             | 6.21            | 22                           | 17                                       | 9                              | 7                                          | 6                                     | 0.1                            | 0.24               |
| PGS6_HUMAN            | 26S proteasome non-ATPase regulatory subunit 14                    | 217                        | 34555              | 6.06            | 18                           | 10                                       | 5                              | 3                                          | 3                                     | 0.28                           | 0.82               |
| PP4GB_HUMAN           | Lysoosomal protective protein                                      | 217                        | 54431              | 6.16            | 11                           | 8                                        | 7                              | 4                                          | 4                                     | 0.27                           | 0.36               |
| ADP2_HUMAN            | ADP-ATP translocase 2                                              | 192                        | 32931              | 9.71            | 18                           | 9                                        | 7                              | 4                                          | 7                                     | 0.32                           | 0.66               |
| OUAL1_HUMAN           | Osteocalcin ATPase 1                                               | 217                        | 44715              | 7.64            | 12                           | 8                                        | 5                              | 3                                          | 3                                     | 0.3                            | 0.6                |
| RAB35_HUMAN           | Rab-35-related protein Rab-35                                      | 194                        | 23011              | 8.52            | 12                           | 6                                        | 4                              | 3                                          | 3                                     | 0.23                           | 0.71               |
| TSPD_HUMAN            | Transducin protein                                                 | 215                        | 18816              | 6.43            | 13                           | 6                                        | 3                              | 3                                          | 3                                     | 0.48                           | 0.82               |
| KAP2_HUMAN            | cAMP-dependent protein kinase type II- $\alpha$ regulatory subunit | 212                        | 45490              | 4.66            | 5                            | 3                                        | 2                              | 1                                          | 2                                     | 0.08                           | 0.1                |
| ANZB2_HUMAN           | Acidic leucine-rich nuclear phosphoprotein 32 family member B      | 211                        | 28770              | 3.84            | 6                            | 6                                        | 3                              | 3                                          | 2                                     | 0.27                           | 0.54               |
| ANZA_HUMAN            | Acidic leucine-rich nuclear phosphoprotein 32 family member A      | 87                         | 28568              | 3.89            | 5                            | 2                                        | 2                              | 2                                          | 2                                     | 0.2                            | 0.34               |
| SEPT3_HUMAN           | Septin-3                                                           | 211                        | 65361              | 6.06            | 23                           | 8                                        | 9                              | 4                                          | 9                                     | 0.31                           | 0.29               |
| NRXN1_HUMAN           | Narxin                                                             | 211                        | 131488             | 4.89            | 13                           | 5                                        | 8                              | 4                                          | 8                                     | 0.14                           | 0.1                |
| ETPL2_HUMAN           | Elongation factor Tu, mitochondrial                                | 210                        | 45510              | 7.26            | 23                           | 9                                        | 9                              | 4                                          | 9                                     | 0.34                           | 0.46               |
| PUR2_HUMAN            | Trifunctional purine biosynthetic protein adenosine-3              | 209                        | 107699             | 6.26            | 13                           | 6                                        | 9                              | 4                                          | 9                                     | 0.23                           | 0.17               |
| QSO1_HUMAN            | Rap1 GTPase-GDP dissociation inhibitor 1                           | 209                        | 66275              | 5.17            | 8                            | 4                                        | 4                              | 2                                          | 4                                     | 0.13                           | 0.13               |
| MP_HUMAN              | Macrophage migration inhibitory factor                             | 209                        | 12468              | 7.74            | 46                           | 18                                       | 3                              | 3                                          | 3                                     | 0.36                           | 1.67               |
| DPP1_HUMAN            | Dipeptidyl peptidase 3                                             | 209                        | 82538              | 5.02            | 16                           | 13                                       | 9                              | 6                                          | 9                                     | 0.26                           | 0.38               |
| VATA_HUMAN            | V-type proton ATPase catalytic subunit A                           | 205                        | 68260              | 5.95            | 16                           | 7                                        | 8                              | 6                                          | 6                                     | 0.34                           | 0.36               |
| FAAA_HUMAN            | Fumarate hydratase                                                 | 205                        | 46344              | 6.46            | 12                           | 8                                        | 6                              | 3                                          | 6                                     | 0.35                           | 0.31               |
| HMS1_HUMAN            | Hypoxanthine/Myo-inositol-Deoxy-thymine synthase, cytosolic        | 205                        | 97257              | 5.22            | 24                           | 9                                        | 9                              | 6                                          | 9                                     | 0.38                           | 0.66               |
| FBP5_HUMAN            | Peptide/Protein-cis-trans isomerase FKBP5                          | 205                        | 51180              | 5.7             | 9                            | 6                                        | 5                              | 3                                          | 5                                     | 0.21                           | 0.68               |
| IMA1_HUMAN            | Importin subunit alpha-1                                           | 204                        | 59991              | 4.89            | 20                           | 10                                       | 8                              | 5                                          | 7                                     | 0.35                           | 0.63               |
| ABDH4_HUMAN           | Microsomal acid phosphatase, mitochondrial                         | 203                        | 33911              | 6.8             | 7                            | 7                                        | 2                              | 2                                          | 2                                     | 0.12                           | 0.28               |
| PRDX3_HUMAN           | Thioredoxin-dependent peroxide reductase, mitochondrial            | 203                        | 27675              | 7.67            | 9                            | 8                                        | 4                              | 3                                          | 4                                     | 0.42                           | 0.57               |
| SCFD1_HUMAN           | Sac1 family domain-containing protein 1                            | 203                        | 72334              | 5.89            | 12                           | 7                                        | 6                              | 3                                          | 6                                     | 0.22                           | 0.26               |
| SNXA_HUMAN            | Alphamethyl NEE attachment protein                                 | 203                        | 33211              | 5.23            | 15                           | 11                                       | 6                              | 4                                          | 6                                     | 0.35                           | 0.65               |
| STAT2_HUMAN           | Signal transducer and activator of transcription 2                 | 203                        | 97855              | 5.34            | 16                           | 7                                        | 7                              | 4                                          | 7                                     | 0.17                           | 0.19               |
| IMA2_HUMAN            | Importin subunit alpha-2                                           | 202                        | 59706              | 5.25            | 5                            | 4                                        | 2                              | 1                                          | 2                                     | 0.09                           | 0.07               |
| SCMR1_HUMAN           | Sema100-related integrin-like receptor 1                           | 201                        | 25119              | 5.61            | 10                           | 6                                        | 4                              | 3                                          | 4                                     | 0.43                           | 0.84               |
| PI3MD4_HUMAN          | 26S proteasome non-ATPase regulatory subunit 4                     | 200                        | 40711              | 4.68            | 6                            | 5                                        | 4                              | 3                                          | 4                                     | 0.19                           | 0.36               |
| HPY_HUMAN             | Hemoglobin                                                         | 198                        | 45177              | 6.13            | 18                           | 11                                       | 6                              | 3                                          | 6                                     | 0.24                           | 0.32               |
| RNDI1_HUMAN           | RND domain-containing protein 1                                    | 198                        | 27922              | 4.11            | 9                            | 7                                        | 2                              | 2                                          | 2                                     | 0.23                           | 0.34               |
| SET_HUMAN             | Protein SET                                                        | 198                        | 33409              | 4.23            | 16                           | 11                                       | 4                              | 3                                          | 4                                     | 0.27                           | 0.45               |
| NDC80_HUMAN           | Nuclear midline protein nDC80                                      | 198                        | 38218              | 9.27            | 10                           | 7                                        | 2                              | 2                                          | 2                                     | 0.1                            | 0.24               |
| AKAP1_HUMAN           | A-kinase anchor protein 2                                          | 198                        | 84603              | 5.04            | 8                            | 6                                        | 2                              | 1                                          | 2                                     | 0.07                           | 0.14               |
| STPL_HUMAN            | Stress-activated protein phosphatase 1                             | 197                        | 85598              | 6.4             | 24                           | 5                                        | 8                              | 4                                          | 8                                     | 0.27                           | 0.31               |
| FBP5_HUMAN            | Peptide/Protein-cis-trans isomerase FKBP5                          | 196                        | 63044              | 4.91            | 9                            | 6                                        | 5                              | 3                                          | 5                                     | 0.18                           | 0.22               |
| DCIL1_HUMAN           | Cytoskeletal dynamin 1 Ig-like intermediate chain 1                | 194                        | 56544              | 6.01            | 11                           | 7                                        | 3                              | 3                                          | 3                                     | 0.11                           | 0.25               |
| ATPL_HUMAN            | ATP synthase subunit g, mitochondrial                              | 194                        | 11421              | 9.65            | 6                            | 3                                        | 4                              | 1                                          | 4                                     | 0.48                           | 0.43               |
| SVK_HUMAN             | Lysine-mRNA ligase                                                 | 194                        | 68005              | 5.84            | 17                           | 8                                        | 8                              | 4                                          | 8                                     | 0.3                            | 0.36               |
| PO2_HUMAN             | Decorin                                                            | 194                        | 39722              | 8.75            | 4                            | 3                                        | 2                              | 2                                          | 2                                     | 0.12                           | 0.23               |
| VQCC2_HUMAN           | Voltage-dependent anion-selective channel protein 2                | 193                        | 31547              | 7.49            | 10                           | 7                                        | 5                              | 2                                          | 5                                     | 0.36                           | 0.3                |
| LMAN1_HUMAN           | Protein ERGIC-53                                                   | 193                        | 57513              | 6.3             | 16                           | 3                                        | 8                              | 3                                          | 8                                     | 0.4                            | 0.24               |
| OTUB1_HUMAN           | Ubiquitin thioesterase OTUB1                                       | 193                        | 31264              | 4.95            | 14                           | 7                                        | 8                              | 5                                          | 8                                     | 0.61                           | 0.94               |
| GLUE2_HUMAN           | Glucocorticoid 2 subunit beta                                      | 192                        | 95388              | 4.33            | 17                           | 13                                       | 5                              | 4                                          | 5                                     | 0.2                            | 0.42               |
| NASP_HUMAN            | Nuclear autoantigenic sperm protein                                | 191                        | 85188              | 4.26            | 17                           | 8                                        | 6                              | 4                                          | 6                                     | 0.19                           | 0.22               |
| TAF2_HUMAN            | Tafiiin-2                                                          | 190                        | 39523              | 6.37            | 14                           | 10                                       | 7                              | 5                                          | 7                                     | 0.35                           | 0.69               |
| NP1L1_HUMAN           | Nucleosome assembly protein 1-like 1                               | 190                        | 45346              | 4.36            | 24                           | 14                                       | 7                              | 5                                          | 7                                     | 0.39                           | 0.58               |
| MGST1_HUMAN           | Microsomal glutathione S-transferase 1                             | 188                        | 17587              | 9.41            | 9                            | 8                                        | 3                              | 3                                          | 3                                     | 0.46                           | 1.02               |
| CTRH1_HUMAN           | CoReceptor-like heparan sulfate-binding protein 1                  | 188                        | 26207              | 8.31            | 7                            | 7                                        | 1                              | 1                                          | 1                                     | 0.12                           | 0.17               |
| NPS1_HUMAN            | Protein NpSnp homolog 1                                            | 187                        | 33289              | 9.35            | 13                           | 8                                        | 4                              | 3                                          | 4                                     | 0.27                           | 0.45               |
| TRER_HUMAN            | Transmembrane protein 126A                                         | 186                        | 21513              | 9.26            | 5                            | 5                                        | 1                              | 1                                          | 1                                     | 0.11                           | 0.21               |
| DNKX_HUMAN            | Transmembrane protein RNA helicase A                               | 186                        | 140869             | 6.41            | 15                           | 7                                        | 7                              | 3                                          | 7                                     | 0.12                           | 0.09               |
| IPYR1_HUMAN           | Inorganic pyrophosphatase                                          | 185                        | 32639              | 5.54            | 17                           | 10                                       | 8                              | 6                                          | 8                                     | 0.54                           | 1.14               |
| PCNA_HUMAN            | Proliferating cell nuclear antigen                                 | 184                        | 28760              | 4.57            | 11                           | 8                                        | 7                              | 5                                          | 7                                     | 0.56                           | 1.06               |
| DYN2_HUMAN            | Dynamin-2                                                          | 183                        | 98063              | 7.04            | 5                            | 4                                        | 2                              | 1                                          | 2                                     | 0.87                           | 0.04               |
| COPI1_HUMAN           | Copine-1                                                           | 183                        | 59022              | 5.52            | 16                           | 12                                       | 5                              | 4                                          | 5                                     | 0.24                           | 0.42               |
| HEXB_HUMAN            | Hexameric hexosaminidase subunit beta                              | 183                        | 63071              | 6.26            | 13                           | 7                                        | 6                              | 3                                          | 6                                     | 0.19                           | 0.22               |
| PAI1_HUMAN            | Plasminogen activator inhibitor 1                                  | 183                        | 45031              | 6.88            | 8                            | 5                                        | 6                              | 3                                          | 6                                     | 0.29                           | 0.32               |
| BAFPI_HUMAN           | Brain acid soluble protein 1                                       | 181                        | 22480              | 4.64            | 54                           | 15                                       | 7                              | 6                                          | 7                                     | 0.54                           | 2.58               |
| ABRAL_HUMAN           | Cortactin family protein ABRAL                                     | 180                        | 9051               | 5.86            | 8                            | 5                                        | 2                              | 1                                          | 2                                     | 0.46                           | 0.56               |
| PRIO_HUMAN            | Peptide/Protein-cis-trans isomerase C                              | 180                        | 22749              | 8.48            | 12                           | 10                                       | 2                              | 2                                          | 2                                     | 0.31                           | 1.07               |
| HNRI1_HUMAN           | Heterogeneous nuclear ribonucleoprotein H                          | 179                        | 48188              | 5.89            | 9                            | 7                                        | 4                              | 3                                          | 4                                     | 0.18                           | 0.29               |

<sup>1</sup>Protein score is calculated from the score of the peptide attributed to the protein.

<sup>2</sup>pI is (Predicted) isoelectric point.

<sup>3</sup>Number of matches is spectrum number matched to protein<sup>1</sup>.

<sup>4</sup>Number of significant matches is spectrum number that matches protein and exceeds the identification criteria.

<sup>5</sup>Number of sequences is number of peptides matched to protein<sup>1</sup>.

<sup>6</sup>Number of significant sequences is number of peptides exceeding the identification criteria matched to proteins.

<sup>7</sup>Number of unique sequences is a unique<sup>7</sup> number of peptides matched to proteins.

<sup>8</sup>Sequence coverage is the ratio of the total number of matched peptide residues to the total length of the protein.

<sup>9</sup>Exponentially Modified Protein Abundance Index ([http://www.matrixscience.com/help/empai\\_help.html](http://www.matrixscience.com/help/empai_help.html)).

Table S1, Cont'd.

| UniProt/Swiss-Prot ID | Description                                                                     | Protein score <sup>a</sup> | Protein mass (kDa) | pI <sup>b</sup> | Num. of matches <sup>c</sup> | Num. of significant matches <sup>d</sup> | Num. of sequences <sup>e</sup> | Num. of significant sequences <sup>f</sup> | Num. of unique sequences <sup>g</sup> | Sequence coverage <sup>h</sup> | emPAI <sup>i</sup> |
|-----------------------|---------------------------------------------------------------------------------|----------------------------|--------------------|-----------------|------------------------------|------------------------------------------|--------------------------------|--------------------------------------------|---------------------------------------|--------------------------------|--------------------|
| TF1B2_HUMAN           | Transcription intermediary factor 1-beta                                        | 176                        | 88492              | 5.52            | 10                           | 7                                        | 6                              | 4                                          | 6                                     | 0.17                           | 0.27               |
| SCOT1_HUMAN           | Succinyl-CoA:cholesterol coenzyme A transferase 1, mitochondrial                | 175                        | 56122              | 7.14            | 10                           | 8                                        | 6                              | 5                                          | 6                                     | 0.29                           | 0.45               |
| HEXA_HUMAN            | Beta-hexosaminidase subunit alpha                                               | 175                        | 60664              | 5.04            | 9                            | 6                                        | 5                              | 4                                          | 4                                     | 0.21                           | 0.32               |
| GLRX1_HUMAN           | Glutaredoxin-1                                                                  | 174                        | 17149              | 8.33            | 12                           | 6                                        | 2                              | 2                                          | 2                                     | 0.47                           | 1.82               |
| AATC2_HUMAN           | Aspartate aminotransferase, cytoplasmic                                         | 174                        | 46219              | 6.52            | 13                           | 5                                        | 4                              | 2                                          | 4                                     | 0.16                           | 0.2                |
| TRP1_HUMAN            | Transferin receptor protein 1                                                   | 173                        | 84810              | 6.18            | 27                           | 15                                       | 8                              | 4                                          | 8                                     | 0.2                            | 0.22               |
| ALIB1_HUMAN           | Aldehyde dehydrogenase 5, mitochondrial                                         | 173                        | 57170              | 6.38            | 20                           | 13                                       | 5                              | 3                                          | 5                                     | 0.19                           | 0.44               |
| AMP1_HUMAN            | Cytosolic aminopeptidase                                                        | 172                        | 56131              | 8.03            | 17                           | 10                                       | 6                              | 10                                         | 6                                     | 0.38                           | 0.56               |
| PIRFG1_HUMAN          | CTP synthase 1                                                                  | 172                        | 66848              | 6.02            | 8                            | 8                                        | 3                              | 3                                          | 3                                     | 0.13                           | 0.26               |
| MOGS_HUMAN            | Mannose-6-phosphogalactose 4-epimerase                                          | 172                        | 91861              | 8.37            | 21                           | 11                                       | 9                              | 6                                          | 9                                     | 0.24                           | 0.51               |
| HMOX3_HUMAN           | Heme oxygenase 2                                                                | 171                        | 36010              | 5.31            | 5                            | 3                                        | 4                              | 2                                          | 4                                     | 0.25                           | 0.26               |
| ORLH1_HUMAN           | Oligonucleotide, mitochondrial                                                  | 171                        | 29516              | 6.41            | 6                            | 5                                        | 2                              | 1                                          | 2                                     | 0.2                            | 0.17               |
| DDX35L_HUMAN          | Probable ATP-dependent RNA helicase DDX58                                       | 167                        | 166531             | 6.03            | 6                            | 4                                        | 4                              | 2                                          | 4                                     | 0.11                           | 0.08               |
| PIB2L_HUMAN           | Prohibitin-2                                                                    | 166                        | 33276              | 8.23            | 13                           | 8                                        | 7                              | 4                                          | 7                                     | 0.39                           | 0.85               |
| PGM1_HUMAN            | Phosphoglucomutase-1                                                            | 166                        | 81411              | 6.3             | 8                            | 6                                        | 5                              | 3                                          | 5                                     | 0.19                           | 0.23               |
| DNAA2_HUMAN           | DnaJ homolog subfamily A member 2                                               | 165                        | 45717              | 6.06            | 11                           | 7                                        | 4                              | 2                                          | 4                                     | 0.24                           | 0.2                |
| ACSL3_HUMAN           | Long-chain-fatty-acyl-CoA ligase 3                                              | 165                        | 60368              | 8.65            | 18                           | 9                                        | 9                              | 5                                          | 9                                     | 0.2                            | 0.3                |
| DKC2L_HUMAN           | DbaH24-like steroid reductase                                                   | 165                        | 60062              | 8.42            | 20                           | 9                                        | 9                              | 4                                          | 9                                     | 0.38                           | 0.22               |
| TMO3L_HUMAN           | Protein disulfide-isomerase TMO3                                                | 165                        | 51839              | 4.8             | 6                            | 4                                        | 4                              | 2                                          | 4                                     | 0.21                           | 0.17               |
| ETFA_HUMAN            | Electron transfer flavoprotein subunit alpha, mitochondrial                     | 165                        | 29558              | 8.62            | 9                            | 6                                        | 4                              | 2                                          | 4                                     | 0.26                           | 0.27               |
| ZASU2_HUMAN           | Serine/threonine-protein phosphatase 2A 58 kDa regulatory subunit delta isoform | 163                        | 89947              | 8.24            | 4                            | 3                                        | 3                              | 2                                          | 3                                     | 0.1                            | 0.13               |
| ECM1_HUMAN            | DbaH23-like delta2 A'-domain-CoA isomerase, mitochondrial                       | 163                        | 35782              | 8.16            | 13                           | 8                                        | 4                              | 2                                          | 4                                     | 0.19                           | 0.26               |
| RND1L_HUMAN           | Rhs-GTPase-activating protein 1                                                 | 162                        | 58404              | 5.85            | 21                           | 15                                       | 8                              | 6                                          | 8                                     | 0.36                           | 0.84               |
| POP_HUMAN             | Lysosomal Pro-X carboxypeptidase                                                | 162                        | 55764              | 6.75            | 7                            | 4                                        | 2                              | 2                                          | 2                                     | 0.1                            | 0.16               |
| QSOX1_HUMAN           | Rhs-GDP-association inhibitor 1                                                 | 161                        | 23192              | 5.02            | 25                           | 12                                       | 8                              | 5                                          | 8                                     | 0.51                           | 1.44               |
| CSRP1_HUMAN           | Cysteine and glycine-rich protein 1                                             | 161                        | 20554              | 8.9             | 9                            | 6                                        | 6                              | 4                                          | 6                                     | 0.42                           | 1.23               |
| PURH1_HUMAN           | Bifunctional purine biosynthesis protein PURH                                   | 160                        | 64575              | 6.27            | 17                           | 7                                        | 11                             | 4                                          | 11                                    | 0.36                           | 0.29               |
| COPZ2_HUMAN           | Catenin subunit zeta-2                                                          | 159                        | 23533              | 5.08            | 7                            | 6                                        | 3                              | 3                                          | 3                                     | 0.25                           | 0.69               |
| UBP2L_HUMAN           | Ubiquitin carboxyl-terminal hydrolase 5                                         | 158                        | 95725              | 4.91            | 14                           | 8                                        | 8                              | 5                                          | 8                                     | 0.2                            | 0.24               |
| SUST2_HUMAN           | Suspectosome-1                                                                  | 158                        | 47657              | 5.1             | 9                            | 6                                        | 3                              | 3                                          | 3                                     | 0.3                            | 0.3                |
| NLTP_HUMAN            | Non-specific lipid transfer protein                                             | 157                        | 58556              | 6.44            | 5                            | 3                                        | 1                              | 1                                          | 3                                     | 0.07                           | 0.07               |
| CATC2_HUMAN           | Deacetylase 2                                                                   | 157                        | 51820              | 6.54            | 10                           | 8                                        | 6                              | 4                                          | 6                                     | 0.36                           | 0.38               |
| AMM1_HUMAN            | Protein arginine N-methyltransferase 1                                          | 157                        | 41468              | 5.24            | 7                            | 7                                        | 3                              | 3                                          | 3                                     | 0.35                           | 0.35               |
| MP2K2_HUMAN           | Dual specificity mitogen-activated protein kinase kinase 2                      | 157                        | 44396              | 6.12            | 5                            | 5                                        | 2                              | 2                                          | 1                                     | 0.12                           | 0.21               |
| MP2K1_HUMAN           | Dual specificity mitogen-activated protein kinase kinase 1                      | 150                        | 43411              | 6.18            | 8                            | 6                                        | 4                              | 2                                          | 3                                     | 0.28                           | 0.21               |
| HCDL1_HUMAN           | 3-hydroxyacyl-CoA dehydrogenase type-2                                          | 156                        | 29606              | 7.86            | 8                            | 5                                        | 3                              | 2                                          | 3                                     | 0.2                            | 0.85               |
| LAMP1_HUMAN           | Lysosome-associated membrane glycoprotein 1                                     | 156                        | 44854              | 9               | 15                           | 6                                        | 4                              | 2                                          | 4                                     | 0.14                           | 0.2                |
| Serpin H4             | Serpin H4                                                                       | 156                        | 46820              | 6.29            | 12                           | 6                                        | 5                              | 3                                          | 5                                     | 0.12                           | 0.21               |
| GT2S1_HUMAN           | Proteasome activator complex subunit 1                                          | 155                        | 71590              | 6.85            | 20                           | 8                                        | 9                              | 5                                          | 9                                     | 0.27                           | 0.34               |
| MAOX1_HUMAN           | NAD(P)-dependent malic enzyme                                                   | 155                        | 64109              | 5.79            | 5                            | 4                                        | 4                              | 4                                          | 4                                     | 0.19                           | 0.3                |
| ERFPL1_HUMAN          | Endoplasmic reticulum resident protein 29                                       | 155                        | 28675              | 6.77            | 16                           | 6                                        | 6                              | 3                                          | 6                                     | 0.38                           | 1.04               |
| DDX1_HUMAN            | ATP-dependent RNA helicase DDX1                                                 | 154                        | 82380              | 6.81            | 13                           | 5                                        | 7                              | 4                                          | 7                                     | 0.18                           | 0.22               |
| ACSL3L_HUMAN          | Long-chain-fatty-acyl-CoA ligase 1                                              | 153                        | 77693              | 8.81            | 6                            | 4                                        | 5                              | 3                                          | 5                                     | 0.16                           | 0.17               |
| DCN1L_HUMAN           | Dancin subunit 1                                                                | 152                        | 141807             | 5.81            | 16                           | 8                                        | 9                              | 5                                          | 9                                     | 0.4                            | 0.13               |
| DDCP1_HUMAN           | Unoporphyrinogen decarboxylase                                                  | 152                        | 40761              | 5.77            | 16                           | 7                                        | 8                              | 3                                          | 8                                     | 0.5                            | 0.36               |
| TRP1L_HUMAN           | Tryptophanase 1                                                                 | 151                        | 61210              | 6.01            | 11                           | 6                                        | 4                              | 3                                          | 4                                     | 0.07                           | 0.07               |
| MXK3L_HUMAN           | Mitogen-activated protein kinase 3                                              | 149                        | 43108              | 6.28            | 11                           | 6                                        | 7                              | 4                                          | 5                                     | 0.39                           | 0.47               |
| IMA3_HUMAN            | Importin subunit alpha-3                                                        | 116                        | 57851              | 4.8             | 15                           | 4                                        | 8                              | 3                                          | 6                                     | 0.35                           | 0.24               |
| GRAL1_HUMAN           | Glucuronate 6-phosphatase N-acetyltransferase                                   | 149                        | 20736              | 6.17            | 8                            | 6                                        | 4                              | 1                                          | 4                                     | 0.42                           | 0.81               |
| GEH6_HUMAN            | Glutathione synthetase                                                          | 148                        | 52352              | 5.67            | 8                            | 5                                        | 7                              | 5                                          | 7                                     | 0.25                           | 0.49               |
| ATP5B_HUMAN           | ATP synthase subunit c, mitochondrial                                           | 148                        | 18480              | 5.21            | 8                            | 5                                        | 3                              | 2                                          | 3                                     | 0.24                           | 0.56               |
| CRPT1_HUMAN           | Protein carboxy homology 2                                                      | 148                        | 29539              | 4.81            | 8                            | 4                                        | 5                              | 4                                          | 5                                     | 0.45                           | 1.22               |
| NOMD1_HUMAN           | Nodal modulator 1                                                               | 148                        | 134239             | 5.54            | 18                           | 7                                        | 10                             | 5                                          | 10                                    | 0.19                           | 0.17               |
| IFAE1_HUMAN           | Eukaryotic translation initiation factor 4E                                     | 147                        | 25062              | 5.79            | 12                           | 6                                        | 4                              | 3                                          | 4                                     | 0.33                           | 0.64               |
| DNAB3_HUMAN           | DnaJ homolog subfamily B member 4                                               | 146                        | 37783              | 8.65            | 8                            | 5                                        | 6                              | 3                                          | 6                                     | 0.37                           | 0.39               |
| NNO1_HUMAN            | Non-POU domain-containing octamer-binding protein                               | 145                        | 54187              | 8.01            | 10                           | 3                                        | 2                              | 1                                          | 2                                     | 0.11                           | 0.08               |
| TOMT1_HUMAN           | Mitochondrial import receptor subunit TOMT1                                     | 145                        | 67412              | 6.75            | 7                            | 5                                        | 4                              | 1                                          | 4                                     | 0.16                           | 0.13               |
| TENA1_HUMAN           | Tenascin                                                                        | 145                        | 240700             | 4.79            | 11                           | 5                                        | 7                              | 2                                          | 7                                     | 0.09                           | 0.04               |
| SAH8_HUMAN            | Adenosine homocysteine lyase                                                    | 144                        | 47865              | 5.92            | 23                           | 10                                       | 7                              | 4                                          | 7                                     | 0.2                            | 0.42               |
| FUBP2_HUMAN           | Far upstream element-binding protein 2                                          | 144                        | 73070              | 6.55            | 10                           | 6                                        | 8                              | 4                                          | 8                                     | 0.24                           | 0.26               |
| CTND1_HUMAN           | Catenin delta-1                                                                 | 144                        | 108103             | 5.86            | 5                            | 5                                        | 2                              | 2                                          | 2                                     | 0.06                           | 0.08               |
| PLBL2_HUMAN           | Putative phospholipase B-like 2                                                 | 144                        | 65430              | 6.34            | 16                           | 6                                        | 4                              | 3                                          | 4                                     | 0.2                            | 0.29               |
| PURB1_HUMAN           | Multifunctional protein ADE2                                                    | 144                        | 47048              | 6.95            | 13                           | 4                                        | 9                              | 3                                          | 9                                     | 0.46                           | 0.3                |
| LMNB1_HUMAN           | LIM and nuclear coat (LINC)-like domain-containing protein 1                    | 143                        | 37226              | 8.63            | 8                            | 7                                        | 5                              | 4                                          | 5                                     | 0.32                           | 0.39               |
| MRPL1_HUMAN           | Chloramphenicol resistance-Ser345phosphate receptor                             | 143                        | 20972              | 5.07            | 4                            | 4                                        | 2                              | 1                                          | 2                                     | 0.16                           | 0.49               |
| STYLC1_HUMAN          | Tyrosine-tyrosine kinase, cytoplasmic                                           | 143                        | 59106              | 6.81            | 16                           | 9                                        | 5                              | 4                                          | 5                                     | 0.15                           | 0.33               |
| SECT1_HUMAN           | Protein SECT1 homolog                                                           | 142                        | 35516              | 5.22            | 8                            | 7                                        | 4                              | 2                                          | 4                                     | 0.26                           | 0.42               |
| RPE1_HUMAN            | Ribulose-1,5-bisphosphate 3-epimerase                                           | 142                        | 24811              | 5.33            | 5                            | 5                                        | 1                              | 1                                          | 1                                     | 0.16                           | 0.29               |
| PSMD1_HUMAN           | 26S proteasome non-ATPase regulatory subunit 3                                  | 141                        | 69839              | 8.47            | 15                           | 6                                        | 8                              | 4                                          | 8                                     | 0.25                           | 0.31               |
| DDX8_HUMAN            | Probable ATP-dependent RNA helicase DDX8                                        | 140                        | 54382              | 8.85            | 11                           | 8                                        | 5                              | 4                                          | 5                                     | 0.37                           | 0.36               |
| GORK1_HUMAN           | Quinone oxidoreductase PIG3                                                     | 140                        | 35514              | 6.67            | 5                            | 3                                        | 4                              | 2                                          | 4                                     | 0.2                            | 0.26               |
| SFRB1_HUMAN           | Serin B8                                                                        | 138                        | 42739              | 5.41            | 3                            | 3                                        | 1                              | 1                                          | 1                                     | 0.06                           | 0.1                |
| PIG3L_HUMAN           | Phosphatidylethanolamine-binding electron assembly protein                      | 138                        | 70710              | 7.7             | 8                            | 4                                        | 4                              | 1                                          | 4                                     | 0.22                           | 0.13               |
| SOX1L_HUMAN           | N-terminal kinase-like protein                                                  | 138                        | 89575              | 5.94            | 4                            | 3                                        | 3                              | 2                                          | 3                                     | 0.11                           | 0.1                |
| EPTR1_HUMAN           | Eukaryotic translation initiation factor 3 subunit 1                            | 137                        | 36476              | 5.38            | 9                            | 6                                        | 7                              | 4                                          | 7                                     | 0.38                           | 0.77               |
| KHS1_HUMAN            | Kinesin-1 heavy chain                                                           | 137                        | 109817             | 6.12            | 13                           | 5                                        | 10                             | 3                                          | 10                                    | 0.22                           | 0.12               |
| SVMC2_HUMAN           | Methionine-mRNA ligase, cytoplasmic                                             | 136                        | 101052             | 5.82            | 9                            | 2                                        | 4                              | 1                                          | 4                                     | 0.11                           | 0.04               |
| STC2_HUMAN            | Glutamine-mRNA ligase                                                           | 136                        | 87142              | 6.71            | 16                           | 7                                        | 6                              | 3                                          | 6                                     | 0.19                           | 0.15               |
| UFL1_HUMAN            | E3 UFM1-protein ligase 1                                                        | 135                        | 89540              | 6.35            | 7                            | 4                                        | 3                              | 2                                          | 3                                     | 0.09                           | 0.1                |
| SFRP5_HUMAN           | Signal receptor-type particle receptor subunit beta                             | 135                        | 29884              | 9.17            | 3                            | 3                                        | 2                              | 2                                          | 2                                     | 0.13                           | 0.22               |
| ROBO1_HUMAN           | 60 kDa 55-kDa Rho-GDP-binding protein                                           | 135                        | 60631              | 8.27            | 9                            | 7                                        | 5                              | 3                                          | 5                                     | 0.19                           | 0.23               |
| EHDL1_HUMAN           | EH domain-containing protein 1                                                  | 135                        | 61137              | 6.33            | 13                           | 3                                        | 5                              | 1                                          | 4                                     | 0.16                           | 0.07               |
| DNB1_HUMAN            | Peroxisomal multifunctional enzyme type 2                                       | 135                        | 79636              | 8.86            | 14                           | 6                                        | 8                              | 4                                          | 8                                     | 0.26                           | 0.23               |
| PSB1_HUMAN            | Proteasome subunit beta type-1                                                  | 134                        | 26472              | 8.27            | 11                           | 5                                        | 6                              | 3                                          | 6                                     | 0.4                            | 0.87               |
| PTTG1_HUMAN           | Putative tumor-transforming gene 1 protein-interacting protein                  | 133                        | 20510              | 8.14            | 4                            | 4                                        | 1                              | 1                                          | 1                                     | 0.1                            | 0.22               |
| AP2A1_HUMAN           | AP-2 complex subunit delta-1                                                    | 133                        | 107478             | 6.82            | 33                           | 8                                        | 11                             | 6                                          | 9                                     | 0.23                           | 0.26               |
| AP2A2_HUMAN           | AP-2 complex subunit delta-2                                                    | 83                         | 103895             | 6.53            | 10                           | 4                                        | 6                              | 3                                          | 4                                     | 0.15                           | 0.13               |
| EPH4_HUMAN            | Endoplasmic reticulum resident protein 44                                       | 132                        | 46841              | 5.09            | 7                            | 7                                        | 2                              | 2                                          | 2                                     | 0.11                           | 0.19               |
| CIT1_HUMAN            | Cit-1-tetrahydrofolate synthase, cytoplasmic                                    | 132                        | 101495             | 6.89            | 27                           | 10                                       | 13                             | 7                                          | 7                                     | 0.28                           | 0.23               |
| SOD1_HUMAN            | Superoxide dismutase [Cu-Zn]                                                    | 132                        | 15928              | 5.7             | 14                           | 5                                        | 4                              | 3                                          | 4                                     | 0.54                           | 1.17               |
| IMA5_HUMAN            | Importin subunit alpha-5                                                        | 132                        | 60184              | 4.84            | 7                            | 5                                        | 3                              | 2                                          | 3                                     | 0.14                           | 0.23               |
| GLRX3_HUMAN           | Glutaredoxin-3                                                                  | 132                        | 37408              | 5.31            | 16                           | 7                                        | 6                              | 3                                          | 6                                     | 0.3                            | 0.4                |
| SIAS1_HUMAN           | Sulfate acid synthase                                                           | 130                        | 40281              | 8.29            | 17                           | 8                                        | 8                              | 4                                          | 8                                     | 0.48                           | 0.51               |
| TRIL1_HUMAN           | Tril-1 membrane glycoprotein                                                    | 130                        | 17923              | 8.86            | 2                            | 1                                        | 2                              | 1                                          | 2                                     | 0.15                           | 0.26               |
| DCN2L_HUMAN           | Dancin subunit 3                                                                | 130                        | 21106              | 5.37            | 8                            | 4                                        | 2                              | 2                                          | 2                                     | 0.31                           | 0.48               |
| SCMD1_HUMAN           | Calcium-binding mitochondrial carrier protein SCMD1                             | 130                        | 33232              | 6               | 7                            | 5                                        | 4                              | 2                                          | 4                                     | 0.22                           | 0.17               |
| PHL2_HUMAN            | Four and a half LIM domain protein 2                                            | 129                        | 32171              | 7.8             | 6                            | 2                                        | 6                              | 2                                          | 6                                     | 0.37                           | 0.29               |
| MAP4_HUMAN            | Microtubule-associated protein 4                                                | 129                        | 120930             | 5.32            | 25                           | 7                                        | 11                             | 3                                          | 11                                    | 0.18                           | 0.11               |
| TM6SF_HUMAN           | Fruitease-2-like phosphatase TM6SF                                              | 128                        | 30042              | 7.6             | 6                            | 5                                        | 4                              | 3                                          | 4                                     | 0.24                           | 0.31               |
| ENPP1_HUMAN           | Ectonucleotide pyrophosphatase/phosphodiesterase family member 1                | 128                        | 104857             | 6.76            | 11                           | 7                                        | 6                              | 3                                          | 6                                     | 0.12                           | 0.13               |

<sup>a</sup>Protein score is calculated from the score of the peptide attributed to the protein.<sup>b</sup>pI is (Predicted) isoelectric point.<sup>c</sup>Number of matches is spectrum number matched to protein<sup>1</sup>.<sup>d</sup>Number of significant matches is spectrum number that matches protein and exceeds the identification criteria.<sup>e</sup>Number of sequences is number of peptides matched to protein<sup>1</sup>.<sup>f</sup>Number of significant sequences is number of peptides exceeding the identification criteria matched to proteins.<sup>g</sup>Number of unique sequences is a unique<sup>1</sup> number of peptides matched to proteins.<sup>h</sup>Sequence coverage is the ratio of the total number of matched peptide residues to the total length of the protein.<sup>i</sup>Exponentially Modified Protein Abundance Index ([http://www.matrixscience.com/help/empai\\_help.html](http://www.matrixscience.com/help/empai_help.html)).

Table S1, Cont.5.

| UniProt/Swiss-Prot ID | Description                                                            | Protein score <sup>a</sup> | Protein mass (kDa) | pI <sup>b</sup> | Num. of matches <sup>c</sup> | Num. of significant matches <sup>c</sup> | Num. of sequences <sup>c</sup> | Num. of significant sequences <sup>c</sup> | Num. of unique sequences <sup>c</sup> | Sequence coverage <sup>d</sup> | emPAI |
|-----------------------|------------------------------------------------------------------------|----------------------------|--------------------|-----------------|------------------------------|------------------------------------------|--------------------------------|--------------------------------------------|---------------------------------------|--------------------------------|-------|
| NADP7_HUMAN           | Nicotinamide phosphoribosyltransferase                                 | 128                        | 35487              | 8.89            | 5                            | 5                                        | 4                              | 4                                          | 5                                     | 0.22                           | 0.48  |
| AT2A2_HUMAN           | Sarcosine <sup>+</sup> /retinoidic retinolic acid-ATPase 2             | 128                        | 114083             | 5.23            | 15                           | 5                                        | 10                             | 4                                          | 2                                     | 0.18                           | 0.2   |
| GOPR5_HUMAN           | GdpG resident protein GOPR5                                            | 126                        | 60556              | 5.02            | 6                            | 3                                        | 5                              | 3                                          | 5                                     | 0.2                            | 0.23  |
| COR1_HUMAN            | Carbonic dehydratase (NADPH) 1                                         | 126                        | 20356              | 6.55            | 5                            | 5                                        | 4                              | 3                                          | 5                                     | 0.2                            | 0.51  |
| SPBB3_HUMAN           | Serpin B6                                                              | 126                        | 42594              | 5.18            | 9                            | 4                                        | 4                              | 4                                          | 4                                     | 0.17                           | 0.48  |
| MIC2J_HUMAN           | C-type histamine receptor 2                                            | 125                        | 16658              | 5.54            | 15                           | 8                                        | 9                              | 5                                          | 9                                     | 0.16                           | 0.13  |
| RLT21_HUMAN           | 60S ribosomal protein L27-4like 1                                      | 125                        | 14558              | 5.27            | 5                            | 5                                        | 5                              | 1                                          | 1                                     | 0.2                            | 0.32  |
| 1C12_HUMAN            | HLA class I histocompatibility antigen, Cw-12 alpha chain              | 125                        | 40860              | 5.91            | 11                           | 6                                        | 5                              | 4                                          | 3                                     | 0.27                           | 0.5   |
| NAC24_HUMAN           | Nucleic acid polymerase-associated confinder subunit alpha-2           | 101                        | 22509              | 4.68            | 7                            | 5                                        | 1                              | 1                                          | 1                                     | 0.05                           | 0.16  |
| SYN2_HUMAN            | Aspartate <sup>+</sup> -tRNA ligase, cytosolic                         | 123                        | 62902              | 5.9             | 12                           | 7                                        | 6                              | 3                                          | 6                                     | 0.22                           | 0.32  |
| ESY72_HUMAN           | Extended synaptotagmin-2                                               | 123                        | 102284             | 9.33            | 5                            | 3                                        | 3                              | 1                                          | 3                                     | 0.07                           | 0.04  |
| OPD7L_HUMAN           | Glutamate peptide synthetase-4like protein                             | 122                        | 42397              | 5.84            | 10                           | 7                                        | 4                              | 3                                          | 4                                     | 0.23                           | 0.34  |
| VKOR1_HUMAN           | Vitamin K epoxide reductase complex subunit 1                          | 122                        | 18223              | 9.53            | 7                            | 5                                        | 2                              | 2                                          | 2                                     | 0.19                           | 0.57  |
| IASPP_HUMAN           | Rib-associated inhibitor                                               | 121                        | 89036              | 6.37            | 4                            | 4                                        | 1                              | 1                                          | 1                                     | 0.03                           | 0.05  |
| TOM1_HUMAN            | Target of Mitochondrial protein 1                                      | 120                        | 53785              | 4.99            | 6                            | 6                                        | 5                              | 3                                          | 3                                     | 0.28                           | 0.36  |
| NOO2_HUMAN            | Ribosylhydronicotinamide dehydrogenase [autone]                        | 120                        | 25802              | 5.88            | 4                            | 4                                        | 1                              | 1                                          | 1                                     | 0.09                           | 0.17  |
| FLU2_HUMAN            | Protein (ligand-1) homolog                                             | 120                        | 144659             | 5.75            | 18                           | 6                                        | 12                             | 4                                          | 12                                    | 0.22                           | 0.16  |
| MT1_HUMAN             | Interferon-induced GTP-binding protein Mt1                             | 119                        | 75473              | 5.8             | 10                           | 6                                        | 5                              | 3                                          | 5                                     | 0.18                           | 0.25  |
| LPXN_HUMAN            | Leupaxin                                                               | 119                        | 43304              | 5.82            | 11                           | 7                                        | 2                              | 2                                          | 2                                     | 0.11                           | 0.21  |
| FABP4_HUMAN           | Protein FABP4                                                          | 119                        | 55366              | 6.15            | 6                            | 5                                        | 1                              | 1                                          | 1                                     | 0.05                           | 0.08  |
| CAT2_HUMAN            | Cathepsin 2                                                            | 118                        | 33848              | 6.7             | 3                            | 3                                        | 2                              | 2                                          | 2                                     | 0.12                           | 0.28  |
| IMDH2_HUMAN           | Inosine-3'-monophosphate dehydrogenase 2                               | 118                        | 55770              | 6.44            | 13                           | 6                                        | 8                              | 5                                          | 8                                     | 0.34                           | 0.45  |
| PAFSL_HUMAN           | Bifunctional 2'-phosphogluconate 5'-phosphoglucate synthase 1          | 118                        | 70788              | 6.4             | 6                            | 2                                        | 4                              | 2                                          | 4                                     | 0.16                           | 0.13  |
| HSPB9_HUMAN           | Heat shock protein beta-9                                              | 118                        | 17125              | 5.95            | 6                            | 2                                        | 3                              | 1                                          | 3                                     | 0.39                           | 0.27  |
| MBP12_HUMAN           | Myelin-binding protein 1A                                              | 117                        | 148762             | 9.34            | 6                            | 4                                        | 7                              | 3                                          | 7                                     | 0.09                           | 0.09  |
| KAT1_HUMAN            | Kynurenine <sup>+</sup> -pyridoxate transaminase 3                     | 117                        | 51388              | 6.4             | 6                            | 4                                        | 3                              | 2                                          | 3                                     | 0.18                           | 0.18  |
| ACBP_HUMAN            | Acyl-CoA-binding protein                                               | 117                        | 10038              | 6.12            | 11                           | 2                                        | 3                              | 2                                          | 3                                     | 0.51                           | 1.25  |
| NAH13_HUMAN           | Nucleoside triphosphatase 15, NaH auxiliary subunit                    | 117                        | 101208             | 7.23            | 10                           | 4                                        | 6                              | 3                                          | 6                                     | 0.14                           | 0.13  |
| GOLP3_HUMAN           | Golgi phosphoprotein 3                                                 | 116                        | 33790              | 6.05            | 8                            | 4                                        | 4                              | 2                                          | 4                                     | 0.23                           | 0.28  |
| PML_HUMAN             | Protein PML                                                            | 116                        | 97489              | 5.88            | 15                           | 5                                        | 8                              | 2                                          | 8                                     | 0.19                           | 0.09  |
| FABP9_HUMAN           | Fatty acid-binding protein, heart                                      | 115                        | 14848              | 6.29            | 17                           | 6                                        | 8                              | 3                                          | 8                                     | 0.21                           | 0.26  |
| RTFAT2_HUMAN          | RNA transcription, translation and transport factor protein            | 114                        | 28051              | 6.19            | 6                            | 4                                        | 3                              | 3                                          | 3                                     | 0.21                           | 0.58  |
| ERD2_HUMAN            | ERF domain-containing protein 2                                        | 114                        | 61123              | 6.63            | 15                           | 8                                        | 6                              | 4                                          | 6                                     | 0.24                           | 0.31  |
| ASAH1_HUMAN           | Acid ceramidase                                                        | 113                        | 44631              | 7.52            | 4                            | 2                                        | 4                              | 2                                          | 4                                     | 0.22                           | 0.21  |
| CY12_HUMAN            | Cytochrome c1, heme protein, mitochondrial                             | 113                        | 35399              | 9.15            | 10                           | 6                                        | 4                              | 3                                          | 4                                     | 0.2                            | 0.42  |
| TSD1_HUMAN            | Thioredoxin domain-containing protein 17                               | 113                        | 13932              | 5.4             | 7                            | 5                                        | 5                              | 3                                          | 5                                     | 0.42                           | 0.4   |
| GALK1_HUMAN           | Galactokinase                                                          | 113                        | 42246              | 6.04            | 13                           | 7                                        | 3                              | 2                                          | 3                                     | 0.23                           | 0.22  |
| PPT1_HUMAN            | CAD protein                                                            | 113                        | 242929             | 6.02            | 24                           | 6                                        | 12                             | 5                                          | 12                                    | 0.13                           | 0.09  |
| RLT22_HUMAN           | 60S ribosomal protein L28                                              | 112                        | 17741              | 11.68           | 9                            | 5                                        | 2                              | 2                                          | 2                                     | 0.08                           | 0.08  |
| AFM1_HUMAN            | Apoptosis-inducing factor 1, mitochondrial                             | 112                        | 66859              | 9.04            | 3                            | 3                                        | 3                              | 3                                          | 3                                     | 0.11                           | 0.21  |
| ANKK1_HUMAN           | Ankrrin-1                                                              | 110                        | 57706              | 5.52            | 6                            | 5                                        | 3                              | 2                                          | 3                                     | 0.2                            | 0.17  |
| CUL4B_HUMAN           | Cul4B-4B                                                               | 112                        | 103916             | 7.01            | 3                            | 2                                        | 3                              | 2                                          | 3                                     | 0.05                           | 0.08  |
| SC24D_HUMAN           | Protein transport protein Sc24D                                        | 111                        | 112936             | 6.91            | 13                           | 5                                        | 10                             | 4                                          | 9                                     | 0.22                           | 0.16  |
| AMPK1_HUMAN           | Adenosine triphosphatase complex-interacting multifunctional protein 2 | 111                        | 35236              | 6.45            | 13                           | 7                                        | 7                              | 5                                          | 7                                     | 0.53                           | 0.6   |
| DNPH1_HUMAN           | 2'-deoxyadenoside 5'-phosphate N-hydrolase 1                           | 111                        | 19097              | 4.97            | 5                            | 3                                        | 2                              | 2                                          | 2                                     | 0.29                           | 0.81  |
| SC24A_HUMAN           | Protein transport protein Sc24A                                        | 110                        | 119674             | 7.58            | 3                            | 3                                        | 1                              | 1                                          | 1                                     | 0.03                           | 0.03  |
| HNPL1_HUMAN           | Heterogeneous nuclear (nonribosomal) protein U-like protein 1          | 110                        | 96878              | 6.49            | 9                            | 5                                        | 2                              | 1                                          | 4                                     | 0.08                           | 0.04  |
| S10A12_HUMAN          | Protein S100-A16                                                       | 109                        | 11784              | 6.28            | 6                            | 4                                        | 2                              | 1                                          | 2                                     | 0.29                           | 0.41  |
| ONE2_HUMAN            | Onecortin-2                                                            | 109                        | 62042              | 6.16            | 16                           | 5                                        | 6                              | 3                                          | 6                                     | 0.16                           | 0.22  |
| ANM5_HUMAN            | Protein arginine N-methyltransferase 5                                 | 109                        | 72838              | 5.88            | 17                           | 11                                       | 5                              | 4                                          | 5                                     | 0.21                           | 0.26  |
| LYZAP2_HUMAN          | Acyl-protein thioesterase 2                                            | 108                        | 24721              | 6.75            | 8                            | 5                                        | 2                              | 1                                          | 2                                     | 0.22                           | 0.18  |
| NUP160_HUMAN          | Nuclear pore complex protein Nup160                                    | 108                        | 182017             | 9.31            | 9                            | 3                                        | 6                              | 2                                          | 6                                     | 0.05                           | 0.1   |
| CDB1_HUMAN            | CDB1 antigen                                                           | 108                        | 25792              | 5.09            | 6                            | 3                                        | 2                              | 2                                          | 2                                     | 0.18                           | 0.38  |
| ADPF1_HUMAN           | ADP-ribosylation factor 6                                              | 108                        | 20069              | 5.24            | 10                           | 7                                        | 5                              | 3                                          | 5                                     | 0.46                           | 0.55  |
| HCOX1_HUMAN           | Hydroxyacyl-coenzyme A dehydrogenase, mitochondrial                    | 107                        | 34272              | 8.88            | 10                           | 5                                        | 4                              | 2                                          | 4                                     | 0.25                           | 0.27  |
| MESD_HUMAN            | LRP chaperone MESD                                                     | 107                        | 26080              | 7.8             | 7                            | 5                                        | 4                              | 3                                          | 4                                     | 0.3                            | 0.61  |
| SERD2_HUMAN           | Phosphoserine aminotransferase                                         | 107                        | 40397              | 7.56            | 17                           | 4                                        | 8                              | 3                                          | 8                                     | 0.46                           | 0.36  |
| SVAP1_HUMAN           | Synapse-associated protein 1                                           | 106                        | 39809              | 4.45            | 4                            | 4                                        | 1                              | 1                                          | 1                                     | 0.1                            | 0.23  |
| MACP1_HUMAN           | Microtubule-actin crosslinking factor 1, isoforms 1/2/3/5              | 106                        | 83787              | 5.28            | 50                           | 4                                        | 28                             | 3                                          | 28                                    | 0.08                           | 0.02  |
| GLT1K1_HUMAN          | Glutathione S-transferase kappa 1                                      | 105                        | 25480              | 8.5             | 10                           | 4                                        | 5                              | 4                                          | 5                                     | 0.38                           | 0.91  |
| SYO2C_HUMAN           | Aspartate <sup>+</sup> -tRNA ligase, cytoplasmic                       | 105                        | 57100              | 6.11            | 7                            | 3                                        | 6                              | 2                                          | 6                                     | 0.24                           | 0.18  |
| GPI1_HUMAN            | Glycosyl-transferase protein                                           | 105                        | 67889              | 5.97            | 10                           | 5                                        | 6                              | 3                                          | 6                                     | 0.18                           | 0.2   |
| ACAD9_HUMAN           | Acyl-CoA dehydrogenase family member 9, mitochondrial                  | 104                        | 68717              | 6.16            | 5                            | 4                                        | 3                              | 2                                          | 3                                     | 0.12                           | 0.2   |
| LTH1_HUMAN            | E3 ubiquitin-protein ligase lathrin                                    | 104                        | 200423             | 5.89            | 6                            | 3                                        | 6                              | 2                                          | 6                                     | 0.06                           | 0.04  |
| INF2_HUMAN            | Inverted formin-2                                                      | 104                        | 135540             | 5.26            | 13                           | 4                                        | 9                              | 4                                          | 9                                     | 0.17                           | 0.13  |
| ALTA1_HUMAN           | Alpha-aminoadipic semialdehyde dehydrogenase                           | 104                        | 58450              | 6.21            | 7                            | 6                                        | 7                              | 6                                          | 7                                     | 0.27                           | 0.53  |
| BNH1_HUMAN            | Myo basic domain-interacting protein 1                                 | 103                        | 84658              | 4.97            | 2                            | 2                                        | 1                              | 1                                          | 1                                     | 0.03                           | 0.07  |
| TBCD1_HUMAN           | TBC1 domain family member 4                                            | 102                        | 146471             | 6.57            | 7                            | 2                                        | 6                              | 1                                          | 6                                     | 0.1                            | 0.03  |
| SPSY1_HUMAN           | Serpin synthesis                                                       | 101                        | 41242              | 4.87            | 10                           | 6                                        | 7                              | 4                                          | 7                                     | 0.43                           | 0.5   |
| IPD4_HUMAN            | Importin-4                                                             | 101                        | 118440             | 4.88            | 9                            | 5                                        | 6                              | 3                                          | 6                                     | 0.13                           | 0.11  |
| DOCK7_HUMAN           | Dedicator of cytokinesis protein 7                                     | 101                        | 242407             | 6.34            | 12                           | 6                                        | 7                              | 4                                          | 7                                     | 0.08                           | 0.07  |
| MPPL1_HUMAN           | Mitochondrial processing peptidase subunit alpha                       | 101                        | 58216              | 6.45            | 8                            | 6                                        | 2                              | 2                                          | 2                                     | 0.08                           | 0.15  |
| SBB2_HUMAN            | Adenosine 2'-phosphate 5'-phosphoglucate transporter 1                 | 101                        | 47484              | 9.32            | 2                            | 1                                        | 2                              | 1                                          | 2                                     | 0.07                           | 0.09  |
| SSBP2_HUMAN           | Single-strand DNA-binding protein, mitochondrial                       | 100                        | 17249              | 9.59            | 6                            | 2                                        | 4                              | 2                                          | 4                                     | 0.41                           | 0.81  |
| RLT23_HUMAN           | 60S ribosomal protein L13                                              | 100                        | 24247              | 11.65           | 15                           | 5                                        | 4                              | 2                                          | 4                                     | 0.19                           | 0.41  |
| QPN2_HUMAN            | Qpnrad1                                                                | 100                        | 63026              | 6.43            | 14                           | 4                                        | 5                              | 3                                          | 5                                     | 0.09                           | 0.22  |
| PEX14_HUMAN           | Peroxisomal membrane protein PEX14                                     | 100                        | 41212              | 4.89            | 3                            | 3                                        | 1                              | 1                                          | 1                                     | 0.1                            | 0.11  |
| PSD1_HUMAN            | 26S proteasome non-ATPase regulatory subunit 12                        | 100                        | 52371              | 7.53            | 11                           | 3                                        | 7                              | 3                                          | 7                                     | 0.23                           | 0.17  |
| USMD2_HUMAN           | Up-regulated during skeletal muscle growth protein 5                   | 100                        | 6452               | 9.78            | 4                            | 2                                        | 1                              | 1                                          | 1                                     | 0.26                           | 0.85  |
| OTD1_HUMAN            | D-mannosyl-CoA deacylase                                               | 98                         | 23409              | 8.35            | 11                           | 3                                        | 4                              | 2                                          | 4                                     | 0.26                           | 0.42  |
| OSGPF_HUMAN           | Prokaryotic RNA N-methyltransferase (transacetylase) transferase       | 98                         | 36403              | 5.94            | 4                            | 2                                        | 3                              | 1                                          | 3                                     | 0.23                           | 0.12  |
| CDB3_HUMAN            | CDB3 antigen                                                           | 98                         | 25619              | 8.14            | 37                           | 13                                       | 3                              | 2                                          | 3                                     | 0.21                           | 0.82  |
| ECMD2_HUMAN           | Proteinase-associated protein, ECMD2 homolog                           | 98                         | 204160             | 6.74            | 16                           | 4                                        | 13                             | 2                                          | 13                                    | 0.19                           | 0.04  |
| TRF1_HUMAN            | Acetyl-CoA acyltransferase, mitochondrial                              | 98                         | 45171              | 8.88            | 4                            | 4                                        | 2                              | 2                                          | 2                                     | 0.12                           | 0.2   |
| IVD2_HUMAN            | Isovaleryl-CoA dehydrogenase, mitochondrial                            | 97                         | 46280              | 8.45            | 5                            | 2                                        | 3                              | 2                                          | 3                                     | 0.18                           | 0.2   |
| OA12_HUMAN            | Oxidative amino transferase, mitochondrial                             | 97                         | 48204              | 6.57            | 5                            | 5                                        | 7                              | 4                                          | 7                                     | 0.22                           | 0.54  |
| HPRT1_HUMAN           | Hypoxanthine <sup>+</sup> -guanine phosphoribosyltransferase           | 96                         | 24564              | 6.21            | 3                            | 3                                        | 2                              | 2                                          | 2                                     | 0.28                           | 0.4   |
| MI0B2_HUMAN           | Unconventional myosin-bb                                               | 96                         | 24249              | 8.91            | 9                            | 2                                        | 7                              | 1                                          | 7                                     | 0.06                           | 0.02  |
| EBF3A_HUMAN           | Eukaryotic translation initiation factor 3 subunit A                   | 95                         | 166468             | 6.38            | 6                            | 3                                        | 5                              | 1                                          | 5                                     | 0.06                           | 0.03  |
| APOL2_HUMAN           | Apolipoprotein L2                                                      | 95                         | 37069              | 6.28            | 6                            | 4                                        | 2                              | 2                                          | 2                                     | 0.17                           | 0.4   |
| ROV1B_HUMAN           | RuvB-like 4                                                            | 94                         | 50196              | 6.02            | 6                            | 1                                        | 6                              | 1                                          | 6                                     | 0.1                            | 0.08  |
| ACM1_HUMAN            | Phosphoenolpyruvate carboxylase mutase                                 | 94                         | 58114              | 5.84            | 15                           | 7                                        | 5                              | 3                                          | 5                                     | 0.25                           | 0.23  |
| ACON1_HUMAN           | Aconitate hydratase, mitochondrial                                     | 94                         | 85372              | 7.26            | 10                           | 4                                        | 4                              | 2                                          | 4                                     | 0.12                           | 0.1   |
| TADP1_HUMAN           | TAR DNA-binding protein 43                                             | 94                         | 44711              | 5.85            | 6                            | 4                                        | 5                              | 4                                          | 5                                     | 0.29                           | 0.45  |
| ANFY1_HUMAN           | Rabanyl-5                                                              | 93                         | 128318             | 5.7             | 18                           | 9                                        | 8                              | 2                                          | 8                                     | 0.15                           | 0.07  |
| P2H2_HUMAN            | Prd-3-hydroxylase 3                                                    | 93                         | 81786              | 5.93            | 6                            | 4                                        | 6                              | 2                                          | 6                                     | 0.16                           | 0.17  |
| SEL1L_HUMAN           | Selenoprotein N                                                        | 93                         | 65773              | 5.92            | 2                            | 2                                        | 2                              | 2                                          | 2                                     | 0.09                           | 0.14  |
| IFU1_HUMAN            | Eukaryotic translation initiation factor 6                             | 93                         | 26582              | 4.56            | 12                           | 6                                        | 6                              | 4                                          | 6                                     | 0.58                           | 1.18  |
| ERD3_HUMAN            | Prokaryotic arginyltransferase protein 28                              | 92                         | 13554              | 8.86            | 2                            | 2                                        | 2                              | 1                                          | 2                                     | 0.09                           | 0.29  |
| SYO1C_HUMAN           | Aspartate <sup>+</sup> -tRNA ligase, cytoplasmic                       | 92                         | 134379             | 6.95            | 11                           | 6                                        | 6                              | 4                                          | 6                                     | 0.14                           | 0.13  |

<sup>a</sup>Protein score is calculated from the score of the peptide attributed to the protein.

<sup>b</sup>pI is (Predicted) isoelectric point.

<sup>c</sup>Number of matches is spectrum number matched to protein<sup>1</sup>.

<sup>c</sup>Number of significant matches is spectrum number that matches protein and exceeds the identification criteria.

<sup>c</sup>Number of sequences is number of peptides matched to protein<sup>1</sup>.

<sup>c</sup>Number of significant sequences is number of peptides exceeding the identification criteria matched to proteins.

<sup>c</sup>Number of unique sequences is a unique<sup>1</sup> number of peptides matched to proteins.

<sup>c</sup>Sequence coverage is the ratio of the total number of matched peptide residues to the total length of the protein.

<sup>d</sup>Exponentially Modified Protein Abundance Index ([http://www.matrixscience.com/help/quant\\_help.html](http://www.matrixscience.com/help/quant_help.html)).

Table S1, Cont'd.

| UniProt/Swiss-Prot ID | Description                                                                       | Protein score <sup>a</sup> | Protein mass (kDa) | pI <sup>b</sup> | Num. of matches <sup>c</sup> | Num. of significant matches <sup>d</sup> | Num. of sequences <sup>e</sup> | Num. of significant sequences <sup>f</sup> | Num. of unique sequences <sup>g</sup> | Sequence coverage <sup>h</sup> | emPAI |
|-----------------------|-----------------------------------------------------------------------------------|----------------------------|--------------------|-----------------|------------------------------|------------------------------------------|--------------------------------|--------------------------------------------|---------------------------------------|--------------------------------|-------|
| ISG15_HUMAN           | Ubiquitin-like protein- ISG15                                                     | 92                         | 17676              | 8.84            | 4                            | 2                                        | 4                              | 2                                          | 4                                     | 0.36                           | 0.38  |
| USP44_HUMAN           | Ubiquitin-like modifier-activating enzyme 6                                       | 92                         | 117395             | 5.16            | 12                           | 3                                        | 8                              | 1                                          | 8                                     | 0.17                           | 0.16  |
| IPYR2_HUMAN           | Inorganic pyrophosphatase 2, mitochondrial                                        | 92                         | 37896              | 7.07            | 5                            | 3                                        | 4                              | 2                                          | 4                                     | 0.2                            | 0.25  |
| VPTG2_HUMAN           | Vascular cell adhesion-associated protein 12C                                     | 92                         | 423124             | 6.38            | 12                           | 4                                        | 10                             | 2                                          | 10                                    | 0.07                           | 0.03  |
| TYPH3_HUMAN           | Thymidine phosphorylase                                                           | 92                         | 49924              | 5.36            | 8                            | 5                                        | 3                              | 2                                          | 3                                     | 0.13                           | 0.18  |
| ARX44_HUMAN           | Armenin A4                                                                        | 91                         | 35660              | 5.84            | 6                            | 3                                        | 3                              | 2                                          | 3                                     | 0.16                           | 0.26  |
| PRKSF_HUMAN           | PRKAT family protein 3                                                            | 91                         | 21600              | 5.77            | 7                            | 4                                        | 4                              | 2                                          | 4                                     | 0.16                           | 0.21  |
| GBF1_HUMAN            | Gdp-specific brefeldin A-resistance guanine nucleotide exchange factor 1          | 91                         | 206315             | 5.48            | 27                           | 5                                        | 11                             | 5                                          | 10                                    | 0.13                           | 0.13  |
| ZAB1_HUMAN            | Serine/threonine-protein phosphatase ZA 55 kDa regulatory subunit B alpha isoform | 91                         | 51659              | 5.82            | 5                            | 2                                        | 4                              | 1                                          | 4                                     | 0.11                           | 0.08  |
| CCO4L_HUMAN           | Collagen alpha1(VII) chain                                                        | 90                         | 332941             | 5.38            | 11                           | 1                                        | 6                              | 1                                          | 6                                     | 0.03                           | 0.01  |
| PGFRB_HUMAN           | Platelet-derived growth factor receptor beta                                      | 90                         | 123889             | 4.88            | 9                            | 4                                        | 3                              | 2                                          | 3                                     | 0.06                           | 0.07  |
| RST5_HUMAN            | Aldehyde reductase 13.14-oxidase                                                  | 90                         | 66777              | 6.54            | 3                            | 3                                        | 1                              | 1                                          | 1                                     | 0.06                           | 0.12  |
| SYR2_HUMAN            | Arginine-tRNA ligase, cytoplasmic                                                 | 90                         | 75331              | 6.26            | 10                           | 5                                        | 8                              | 4                                          | 8                                     | 0.17                           | 0.25  |
| OKSP1_HUMAN           | CDK3 regulatory subunit-associated protein 3                                      | 90                         | 36885              | 4.68            | 6                            | 5                                        | 3                              | 3                                          | 3                                     | 0.09                           | 0.25  |
| ABD1_HUMAN            | Monoclonal Ab-derived AbBD12                                                      | 90                         | 45008              | 8.87            | 6                            | 3                                        | 4                              | 2                                          | 2                                     | 0.23                           | 0.2   |
| EIF3_HUMAN            | Eukaryotic translation initiation factor 3 subunit H                              | 89                         | 39905              | 6.09            | 19                           | 6                                        | 8                              | 3                                          | 8                                     | 0.35                           | 0.37  |
| AKT2_HUMAN            | RAC-beta serine/threonine-protein kinase                                          | 89                         | 55720              | 5.98            | 4                            | 2                                        | 3                              | 1                                          | 3                                     | 0.11                           | 0.08  |
| ARPD_HUMAN            | Actin-related protein 10                                                          | 89                         | 46177              | 7.07            | 4                            | 4                                        | 3                              | 3                                          | 3                                     | 0.21                           | 0.31  |
| PP4R1_HUMAN           | Serine/threonine-protein phosphatase 4 regulatory subunit 1                       | 89                         | 106938             | 4.64            | 4                            | 2                                        | 3                              | 1                                          | 3                                     | 0.08                           | 0.04  |
| HDF_HUMAN             | Hepatosarcoma-derived growth factor                                               | 89                         | 28772              | 4.7             | 6                            | 2                                        | 3                              | 2                                          | 3                                     | 0.26                           | 0.36  |
| CYB5_HUMAN            | Cytochrome b5                                                                     | 88                         | 15321              | 4.88            | 2                            | 2                                        | 1                              | 1                                          | 1                                     | 0.28                           | 0.71  |
| CUT1_HUMAN            | Protein CUT1                                                                      | 88                         | 19104              | 5.42            | 6                            | 6                                        | 2                              | 2                                          | 2                                     | 0.25                           | 0.54  |
| NDP9_HUMAN            | Protein NDP9D                                                                     | 88                         | 60794              | 4.61            | 7                            | 4                                        | 3                              | 2                                          | 3                                     | 0.15                           | 0.23  |
| GHC1_HUMAN            | Mitochondrial glutamate carrier 1                                                 | 87                         | 34448              | 9.42            | 9                            | 2                                        | 6                              | 1                                          | 6                                     | 0.37                           | 0.27  |
| MAGM_HUMAN            | NAD-dependent male enzyme, mitochondrial                                          | 87                         | 65492              | 7.53            | 4                            | 2                                        | 3                              | 1                                          | 3                                     | 0.1                            | 0.07  |
| QCR2_HUMAN            | Cytochrome bcr1 complex subunit 2, mitochondrial                                  | 87                         | 48413              | 6.74            | 7                            | 2                                        | 4                              | 1                                          | 4                                     | 0.14                           | 0.09  |
| MAGD1_HUMAN           | Melanoma-associated antigen D1                                                    | 87                         | 86107              | 5.84            | 5                            | 2                                        | 4                              | 1                                          | 4                                     | 0.12                           | 0.05  |
| RTM4_HUMAN            | Retinoblastoma                                                                    | 87                         | 128651             | 4.43            | 2                            | 2                                        | 2                              | 2                                          | 2                                     | 0.04                           | 0.07  |
| KLC1_HUMAN            | Kinesin light chain 1                                                             | 87                         | 65269              | 5.87            | 8                            | 3                                        | 5                              | 2                                          | 5                                     | 0.12                           | 0.14  |
| LRG4_HUMAN            | Leucine-rich repeat-containing protein 47                                         | 86                         | 63434              | 5.95            | 8                            | 4                                        | 2                              | 1                                          | 2                                     | 0.1                            | 0.07  |
| OTPF1_HUMAN           | Cytosolic FMR1-interacting protein 1                                              | 86                         | 146088             | 6.46            | 11                           | 5                                        | 8                              | 1                                          | 8                                     | 0.15                           | 0.09  |
| AERP_HUMAN            | Adenosine enhancer-binding protein 1                                              | 85                         | 130847             | 5.05            | 3                            | 1                                        | 2                              | 1                                          | 2                                     | 0.03                           | 0.03  |
| ACQD2_HUMAN           | Very long-chain specific acyl-CoA dehydrogenase, mitochondrial                    | 85                         | 70458              | 8.92            | 2                            | 1                                        | 2                              | 1                                          | 2                                     | 0.03                           | 0.03  |
| ABCD3_HUMAN           | ATP-binding cassette sub-family D member 3                                        | 84                         | 75428              | 9.41            | 5                            | 1                                        | 2                              | 1                                          | 2                                     | 0.04                           | 0.06  |
| GLSK_HUMAN            | Glutathione S-transferase, mitochondrial                                          | 84                         | 73414              | 7.85            | 8                            | 5                                        | 4                              | 3                                          | 4                                     | 0.12                           | 0.19  |
| TAF1_HUMAN            | Taf11                                                                             | 83                         | 40236              | 6.48            | 9                            | 4                                        | 4                              | 2                                          | 4                                     | 0.28                           | 0.51  |
| CD98_HUMAN            | CD98 antigen                                                                      | 83                         | 18836              | 4.58            | 3                            | 2                                        | 2                              | 1                                          | 2                                     | 0.39                           | 0.24  |
| SAP1_HUMAN            | G-protein-coupled receptor 47                                                     | 83                         | 20523              | 5.17            | 13                           | 4                                        | 3                              | 2                                          | 3                                     | 0.2                            | 0.48  |
| TRPL2_HUMAN           | Tumor necrosis factor alpha-induced protein B-like protein 3                      | 83                         | 32938              | 8.75            | 2                            | 1                                        | 2                              | 1                                          | 2                                     | 0.07                           | 0.14  |
| SC24C_HUMAN           | Protein transport protein Scs24C                                                  | 82                         | 118249             | 6.71            | 6                            | 3                                        | 4                              | 1                                          | 3                                     | 0.09                           | 0.07  |
| NBE2_HUMAN            | Serine/threonine-protein kinase Nbe2                                              | 82                         | 39363              | 8.26            | 5                            | 3                                        | 4                              | 2                                          | 4                                     | 0.21                           | 0.12  |
| ATPS_HUMAN            | ATP synthase-coupling factor 6, mitochondrial                                     | 82                         | 12580              | 9.52            | 4                            | 2                                        | 2                              | 1                                          | 2                                     | 0.32                           | 0.38  |
| FUBP1_HUMAN           | Far upstream element-binding protein 1                                            | 82                         | 67518              | 7.18            | 8                            | 3                                        | 7                              | 3                                          | 7                                     | 0.2                            | 0.2   |
| GETT1_HUMAN           | Glu-tartrate S-transferase, thiamin-B                                             | 82                         | 27480              | 5.89            | 5                            | 3                                        | 1                              | 1                                          | 1                                     | 0.21                           | 0.16  |
| GETM2_HUMAN           | Glu-tartrate S-transferase Mu 3                                                   | 82                         | 26542              | 5.37            | 3                            | 3                                        | 1                              | 1                                          | 1                                     | 0.07                           | 0.17  |
| ATO1_HUMAN            | Copper transport protein ATO1                                                     | 82                         | 7587               | 6.71            | 2                            | 1                                        | 1                              | 1                                          | 1                                     | 0.23                           | 0.16  |
| GLB1L_HUMAN           | 1,4-galactose-4-epimerase                                                         | 81                         | 88423              | 5.87            | 25                           | 12                                       | 8                              | 3                                          | 8                                     | 0.29                           | 0.17  |
| COG3_HUMAN            | Hsp60 co-chaperone Cdg37                                                          | 81                         | 44440              | 5.17            | 6                            | 5                                        | 3                              | 3                                          | 3                                     | 0.16                           | 0.32  |
| STTQ_HUMAN            | Threonine-DNA ligase, cytoplasmic                                                 | 81                         | 93362              | 6.23            | 13                           | 5                                        | 8                              | 3                                          | 8                                     | 0.18                           | 0.22  |
| NDU5_HUMAN            | ADP-sugar pyrophosphatase                                                         | 81                         | 24312              | 4.87            | 4                            | 3                                        | 3                              | 2                                          | 3                                     | 0.18                           | 0.4   |
| LZC_HUMAN             | Protein LZC                                                                       | 81                         | 21481              | 4.88            | 5                            | 3                                        | 1                              | 1                                          | 1                                     | 0.15                           | 0.21  |
| COL1_HUMAN            | Collagen                                                                          | 81                         | 76526              | 4.98            | 6                            | 4                                        | 2                              | 1                                          | 2                                     | 0.06                           | 0.12  |
| GALT2_HUMAN           | Polypeptide N-acetylglucosaminyltransferase 2                                     | 79                         | 64891              | 8.63            | 5                            | 2                                        | 5                              | 2                                          | 5                                     | 0.14                           | 0.14  |
| CDV2_HUMAN            | Protein CDV2 homolog                                                              | 81                         | 27318              | 6.08            | 4                            | 2                                        | 3                              | 1                                          | 3                                     | 0.23                           | 0.16  |
| NSD4_HUMAN            | Steroid-4-alpha-oxo-3-beta-hydrogenase, decarboxylating                           | 80                         | 41974              | 8.16            | 6                            | 1                                        | 1                              | 1                                          | 1                                     | 0.29                           | 0.1   |
| SFO1_HUMAN            | Sekine factor 1                                                                   | 80                         | 68286              | 9.07            | 6                            | 4                                        | 3                              | 1                                          | 3                                     | 0.1                            | 0.06  |
| ARFG1_HUMAN           | ADP-nucleosylation factor GTPase-activating protein-1                             | 80                         | 44440              | 5.46            | 4                            | 2                                        | 4                              | 2                                          | 4                                     | 0.18                           | 0.21  |
| THM1_HUMAN            | 3-ketopropyl-CoA thiolase, mitochondrial                                          | 80                         | 41898              | 6.32            | 5                            | 3                                        | 4                              | 3                                          | 4                                     | 0.28                           | 0.35  |
| QCR1_HUMAN            | Cytochrome bcr1 complex subunit 1, mitochondrial                                  | 80                         | 52612              | 5.84            | 15                           | 2                                        | 4                              | 2                                          | 4                                     | 0.15                           | 0.17  |
| LSM1_HUMAN            | U6 snRNP-associated Sm-B-like protein Lsm1                                        | 80                         | 9122               | 9.81            | 1                            | 1                                        | 1                              | 1                                          | 1                                     | 0.33                           | 0.56  |
| LSMA1_HUMAN           | LSM domain and actin-binding protein 1                                            | 80                         | 85173              | 6.41            | 4                            | 1                                        | 3                              | 1                                          | 3                                     | 0.08                           | 0.05  |
| SAMH1_HUMAN           | Deoxyribose triphosphate triphosphohydrolase SAMH1                                | 80                         | 72155              | 6.69            | 4                            | 2                                        | 4                              | 2                                          | 4                                     | 0.11                           | 0.12  |
| USAF2_HUMAN           | Sekine factor UFAP 65 kDa subunit                                                 | 80                         | 53467              | 9.19            | 4                            | 3                                        | 3                              | 2                                          | 3                                     | 0.1                            | 0.17  |
| OPTN_HUMAN            | Optineurin                                                                        | 80                         | 65880              | 5.17            | 1                            | 1                                        | 1                              | 1                                          | 1                                     | 0.03                           | 0.07  |
| ARE1_HUMAN            | ADP-nucleosylation factor-B-like protein 3                                        | 79                         | 29443              | 6.74            | 6                            | 1                                        | 3                              | 1                                          | 3                                     | 0.36                           | 0.22  |
| MMP2_HUMAN            | 72 kDa type IV collagenase                                                        | 79                         | 73835              | 5.28            | 6                            | 3                                        | 3                              | 2                                          | 3                                     | 0.13                           | 0.18  |
| BD2_HUMAN             | BHD-interacting domain death agonist                                              | 79                         | 21981              | 5.27            | 7                            | 4                                        | 3                              | 2                                          | 3                                     | 0.29                           | 0.46  |
| LMAN1_HUMAN           | Vascular integrin alpha-5 membrane protein VPS6                                   | 78                         | 40203              | 6.46            | 10                           | 5                                        | 4                              | 4                                          | 4                                     | 0.28                           | 0.51  |
| NU133_HUMAN           | Nuclear pore complex protein Nup133                                               | 78                         | 128888             | 4.97            | 5                            | 3                                        | 4                              | 2                                          | 4                                     | 0.06                           | 0.07  |
| POX_HUMAN             | Peroxidase                                                                        | 78                         | 35060              | 5.76            | 9                            | 3                                        | 7                              | 2                                          | 7                                     | 0.49                           | 0.27  |
| GRPR2_HUMAN           | Quercetin reductase/hydroxyprocate reductase                                      | 78                         | 35648              | 7.01            | 9                            | 6                                        | 4                              | 3                                          | 4                                     | 0.27                           | 0.42  |
| URE22_HUMAN           | Ubiquitin-conjugating enzyme E2 Z                                                 | 78                         | 38186              | 5.37            | 2                            | 2                                        | 1                              | 1                                          | 1                                     | 0.06                           | 0.11  |
| AKA12_HUMAN           | Armeninase protein 12                                                             | 78                         | 191367             | 4.37            | 18                           | 6                                        | 9                              | 4                                          | 9                                     | 0.13                           | 0.09  |
| TPB1_HUMAN            | Trophoblast glycoprotein                                                          | 77                         | 46003              | 6.35            | 7                            | 3                                        | 2                              | 2                                          | 2                                     | 0.09                           | 0.2   |
| GRPE2_HUMAN           | GDI/EPGL endoplasmic functional protein                                           | 77                         | 88638              | 6.84            | 15                           | 4                                        | 3                              | 7                                          | 7                                     | 0.18                           | 0.15  |
| DOAP1_HUMAN           | Protein diaphanous homolog 1                                                      | 77                         | 141258             | 5.31            | 16                           | 4                                        | 10                             | 3                                          | 10                                    | 0.17                           | 0.09  |
| PCYT1A_HUMAN          | Onion-epiophosphate cyclitoltransferase A                                         | 77                         | 41705              | 6.82            | 6                            | 1                                        | 3                              | 1                                          | 3                                     | 0.13                           | 0.1   |
| FDTA_HUMAN            | Serine synthase                                                                   | 77                         | 48004              | 6.1             | 9                            | 2                                        | 6                              | 2                                          | 6                                     | 0.23                           | 0.19  |
| CUL2_HUMAN            | Cul2-1                                                                            | 77                         | 86927              | 6.45            | 5                            | 3                                        | 2                              | 1                                          | 2                                     | 0.1                            | 0.05  |
| LARP1_HUMAN           | Leu-related protein 1                                                             | 77                         | 124334             | 8.91            | 5                            | 4                                        | 3                              | 2                                          | 3                                     | 0.24                           | 0.07  |
| IFITAX_HUMAN          | Eukaryotic translation initiation factor 1A, X-chromosomal                        | 76                         | 16450              | 5.07            | 4                            | 3                                        | 1                              | 1                                          | 1                                     | 0.1                            | 0.38  |
| AASS_HUMAN            | Aldehyde-aminooxidase semialdehyde synthase, mitochondrial                        | 76                         | 102066             | 6.18            | 6                            | 3                                        | 5                              | 2                                          | 5                                     | 0.11                           | 0.09  |
| PAG2_HUMAN            | Proliferator-associated protein 2G4                                               | 76                         | 43759              | 6.13            | 5                            | 2                                        | 4                              | 1                                          | 4                                     | 0.21                           | 0.21  |
| EXOC1_HUMAN           | Exocyst complex component 5                                                       | 76                         | 86790              | 5.8             | 3                            | 2                                        | 1                              | 2                                          | 1                                     | 0.08                           | 0.1   |
| TRD2_HUMAN            | E3 ubiquitin/ISG15 ligase TRD2                                                    | 76                         | 70928              | 8.44            | 8                            | 4                                        | 3                              | 1                                          | 3                                     | 0.08                           | 0.12  |
| EPF2_HUMAN            | Eukaryotic translation initiation factor 3 subunit 2                              | 76                         | 29045              | 4.72            | 1                            | 1                                        | 1                              | 1                                          | 1                                     | 0.05                           | 0.15  |
| GMPPR_HUMAN           | Mannose-1-phosphate guanylyltransferase beta                                      | 75                         | 39809              | 6.16            | 5                            | 2                                        | 4                              | 2                                          | 4                                     | 0.24                           | 0.23  |
| HEMO_HUMAN            | Hemoglobin                                                                        | 76                         | 51643              | 6.55            | 18                           | 7                                        | 7                              | 3                                          | 7                                     | 0.21                           | 0.38  |
| ABR8_HUMAN            | Protein ABD14B                                                                    | 75                         | 22532              | 5.84            | 3                            | 3                                        | 3                              | 3                                          | 3                                     | 0.2                            | 0.14  |
| SPEF_HUMAN            | Spermidine synthase                                                               | 75                         | 33803              | 5.3             | 10                           | 6                                        | 6                              | 3                                          | 6                                     | 0.5                            | 0.44  |
| PLAP_HUMAN            | Phospholipase A2-activating protein                                               | 75                         | 87101              | 5.88            | 9                            | 3                                        | 5                              | 1                                          | 5                                     | 0.12                           | 0.05  |
| ETPL_HUMAN            | Electron transfer flavoprotein subunit beta                                       | 75                         | 27126              | 8.24            | 1                            | 1                                        | 1                              | 1                                          | 1                                     | 0.07                           | 0.16  |
| COR1B_HUMAN           | Coronin-1B                                                                        | 67                         | 54200              | 5.81            | 17                           | 3                                        | 5                              | 3                                          | 5                                     | 0.18                           | 0.26  |
| ORBL_HUMAN            | Orb1/Orb1-related protein 1                                                       | 75                         | 28020              | 6.71            | 6                            | 2                                        | 3                              | 1                                          | 3                                     | 0.21                           | 0.16  |
| GDN_HUMAN             | Gdn-derived protein                                                               | 75                         | 43974              | 9.35            | 2                            | 2                                        | 1                              | 1                                          | 1                                     | 0.07                           | 0.1   |
| NO13_HUMAN            | Nuclein                                                                           | 74                         | 62935              | 6.4             | 8                            | 5                                        | 3                              | 2                                          | 3                                     | 0.12                           | 0.14  |
| NR11_HUMAN            | Hesiderin triad nucleotide-binding protein 1                                      | 74                         | 13783              | 6.43            | 16                           | 4                                        | 3                              | 2                                          | 3                                     | 0.6                            | 0.81  |
| MRAT_HUMAN            | Matrix-remodelling-associated protein 7                                           | 74                         | 21452              | 6.24            | 2                            | 2                                        | 1                              | 1                                          | 1                                     | 0.14                           | 0.21  |
| FAPD5_HUMAN           | Fatty acid-binding protein, epidermal                                             | 74                         | 15155              | 6.8             | 15                           | 3                                        | 3                              | 3                                          | 3                                     | 0.24                           | 0.31  |
| TBCD_HUMAN            | Tubulin-binding cofactor D                                                        | 74                         | 27308              | 5.08            | 6                            | 1                                        | 3                              | 1                                          | 3                                     | 0.19                           | 0.16  |

<sup>a</sup>Protein score is calculated from the score of the peptide attributed to the protein.

<sup>b</sup>pI is (Predicted) isoelectric point.

<sup>c</sup>Number of matches is spectrum number matched to protein<sup>11</sup>.

<sup>d</sup>Number of significant matches is spectrum number that matches protein and exceeds the identification criteria.

<sup>e</sup>Number of sequences is number of peptides matched to protein<sup>12</sup>.

<sup>f</sup>Number of significant sequences is number of peptides exceeding the identification criteria matched to proteins.

<sup>g</sup>Number of unique sequences is a unique<sup>13</sup> number of peptides matched to proteins.

<sup>h</sup>Sequence coverage is the ratio of the total number of matched peptide residues to the total length of the protein.

<sup>i</sup>Exponentially Modified Protein Abundance Index ([http://www.matrixscience.com/help/quant\\_help.html](http://www.matrixscience.com/help/quant_help.html)).

Table S1, Cont'd.

| UniProt/Swiss-Prot ID | Description                                                                                                                                                                                                                                                                                                                                                                                                                                                                                                                                                                                                                                                                                                                                                                                                                                                                                                                                                                                                                                                                                                                                                                                                                                                                                                                                                                                                                                                                                                                                                                                                                                                                                                                                                                                                                                                                                                                                                                                                                                                                                                                                                                                                                                                                                                                                                                                                                                                                                                                                                                                                                                                                                                                                                                                                                                                                                                                                                                                                                                                                                                                                                                                                                                                                                                                                                                                                                                                                                                                                                                                                                                                                                                                                                                                                                                                                                                                                                                                                                                                                                                                                                                                                                                                                                                                                                                                                                                                                                                                                                                                                                                                                                                                                                                                                                                                                                                                                                                                                                                                                                                                                                                                                                                                                                                                                                                                                                                                                                                                                                                                                                                                                                                                                                                                                                                                                                                                                                                                                                                                                                                                                                                                                                                                                                                                                                                                                                                                                                                                                                                                                                                                                                                                                                                                                                                                                                                                                                                                                                                                                                                                                                                                                                                                                                                                                                                                                                                                                                                                                                                                                                                                                                                                                                                                                                                                                                                                                                                                                                                                                                                                                                                                                                                                                                                                                                                                                                                                                                                                                                                                                                                                                                                                                                                                                                                                                                                                                                                                                                                                                                                                                                                                                                                                                                                                                                                                                                                                                                                                                                                                                                                                                                                                                                                                                                                                                                                                                                                                                                                                                                                                                                                                                                                                                                                                                                                                                                                                                                                                                                                                                                                                                                                                                                                                                                                                                                                                                                                                                                                  | Protein score <sup>a</sup> | Protein mass (kDa) | pI <sup>b</sup> | Num. of matches <sup>c</sup> | Num. of significant matches <sup>d</sup> | Num. of sequences <sup>e</sup> | Num. of significant sequences <sup>f</sup> | Num. of unique sequences <sup>g</sup> | Sequence coverage <sup>h</sup> | emPAI <sup>i</sup> |
|-----------------------|----------------------------------------------------------------------------------------------------------------------------------------------------------------------------------------------------------------------------------------------------------------------------------------------------------------------------------------------------------------------------------------------------------------------------------------------------------------------------------------------------------------------------------------------------------------------------------------------------------------------------------------------------------------------------------------------------------------------------------------------------------------------------------------------------------------------------------------------------------------------------------------------------------------------------------------------------------------------------------------------------------------------------------------------------------------------------------------------------------------------------------------------------------------------------------------------------------------------------------------------------------------------------------------------------------------------------------------------------------------------------------------------------------------------------------------------------------------------------------------------------------------------------------------------------------------------------------------------------------------------------------------------------------------------------------------------------------------------------------------------------------------------------------------------------------------------------------------------------------------------------------------------------------------------------------------------------------------------------------------------------------------------------------------------------------------------------------------------------------------------------------------------------------------------------------------------------------------------------------------------------------------------------------------------------------------------------------------------------------------------------------------------------------------------------------------------------------------------------------------------------------------------------------------------------------------------------------------------------------------------------------------------------------------------------------------------------------------------------------------------------------------------------------------------------------------------------------------------------------------------------------------------------------------------------------------------------------------------------------------------------------------------------------------------------------------------------------------------------------------------------------------------------------------------------------------------------------------------------------------------------------------------------------------------------------------------------------------------------------------------------------------------------------------------------------------------------------------------------------------------------------------------------------------------------------------------------------------------------------------------------------------------------------------------------------------------------------------------------------------------------------------------------------------------------------------------------------------------------------------------------------------------------------------------------------------------------------------------------------------------------------------------------------------------------------------------------------------------------------------------------------------------------------------------------------------------------------------------------------------------------------------------------------------------------------------------------------------------------------------------------------------------------------------------------------------------------------------------------------------------------------------------------------------------------------------------------------------------------------------------------------------------------------------------------------------------------------------------------------------------------------------------------------------------------------------------------------------------------------------------------------------------------------------------------------------------------------------------------------------------------------------------------------------------------------------------------------------------------------------------------------------------------------------------------------------------------------------------------------------------------------------------------------------------------------------------------------------------------------------------------------------------------------------------------------------------------------------------------------------------------------------------------------------------------------------------------------------------------------------------------------------------------------------------------------------------------------------------------------------------------------------------------------------------------------------------------------------------------------------------------------------------------------------------------------------------------------------------------------------------------------------------------------------------------------------------------------------------------------------------------------------------------------------------------------------------------------------------------------------------------------------------------------------------------------------------------------------------------------------------------------------------------------------------------------------------------------------------------------------------------------------------------------------------------------------------------------------------------------------------------------------------------------------------------------------------------------------------------------------------------------------------------------------------------------------------------------------------------------------------------------------------------------------------------------------------------------------------------------------------------------------------------------------------------------------------------------------------------------------------------------------------------------------------------------------------------------------------------------------------------------------------------------------------------------------------------------------------------------------------------------------------------------------------------------------------------------------------------------------------------------------------------------------------------------------------------------------------------------------------------------------------------------------------------------------------------------------------------------------------------------------------------------------------------------------------------------------------------------------------------------------------------------------------------------------------------------------------------------------------------------------------------------------------------------------------------------------------------------------------------------------------------------------------------------------------------------------------------------------------------------------------------------------------------------------------------------------------------------------------------------------------------------------------------------------------------------------------------------------------------------------------------------------------------------------------------------------------------------------------------------------------------------------------------------------------------------------------------------------------------------------------------------------------------------------------------------------------------------------------------------------------------------------------------------------------------------------------------------------------------------------------------------------------------------------------------------------------------------------------------------------------------------------------------------------------------------------------------------------------------------------------------------------------------------------------------------------------------------------------------------------------------------------------------------------------------------------------------------------------------------------------------------------------------------------------------------------------------------------------------------------------------------------------------------------------------------------------------------------------------------------------------------------------------------------------------------------------------------------------------------------------------------------------------------------------------------------------------------------------------------------------------------------------------------------------------------------------------------------------------------------------------------------------------------------------------------------------------------------------------------------------------------------------------------------------------------------------------------------------------------------------------------------------------------------------------------------------------------------------------------------------------------------------------------------------------------------------------------------------------------------------------------------------------------------------------------------------------------------------------------------------------------------------------------------------------------------------------------------------------------------------------------------------------------------------------------------------------------------------------------------------------------------------|----------------------------|--------------------|-----------------|------------------------------|------------------------------------------|--------------------------------|--------------------------------------------|---------------------------------------|--------------------------------|--------------------|
| COR2L2_HUMAN          | GDPN ligandosome complex subunit B                                                                                                                                                                                                                                                                                                                                                                                                                                                                                                                                                                                                                                                                                                                                                                                                                                                                                                                                                                                                                                                                                                                                                                                                                                                                                                                                                                                                                                                                                                                                                                                                                                                                                                                                                                                                                                                                                                                                                                                                                                                                                                                                                                                                                                                                                                                                                                                                                                                                                                                                                                                                                                                                                                                                                                                                                                                                                                                                                                                                                                                                                                                                                                                                                                                                                                                                                                                                                                                                                                                                                                                                                                                                                                                                                                                                                                                                                                                                                                                                                                                                                                                                                                                                                                                                                                                                                                                                                                                                                                                                                                                                                                                                                                                                                                                                                                                                                                                                                                                                                                                                                                                                                                                                                                                                                                                                                                                                                                                                                                                                                                                                                                                                                                                                                                                                                                                                                                                                                                                                                                                                                                                                                                                                                                                                                                                                                                                                                                                                                                                                                                                                                                                                                                                                                                                                                                                                                                                                                                                                                                                                                                                                                                                                                                                                                                                                                                                                                                                                                                                                                                                                                                                                                                                                                                                                                                                                                                                                                                                                                                                                                                                                                                                                                                                                                                                                                                                                                                                                                                                                                                                                                                                                                                                                                                                                                                                                                                                                                                                                                                                                                                                                                                                                                                                                                                                                                                                                                                                                                                                                                                                                                                                                                                                                                                                                                                                                                                                                                                                                                                                                                                                                                                                                                                                                                                                                                                                                                                                                                                                                                                                                                                                                                                                                                                                                                                                                                                                                                                                                           | 74                         | 23211              | 5.25            | 7                            | 4                                        | 4                              | 2                                          | 4                                     | 0.49                           | 0.21               |
| KCTD12_HUMAN          | BTB/POZ domain-containing protein KCTD12                                                                                                                                                                                                                                                                                                                                                                                                                                                                                                                                                                                                                                                                                                                                                                                                                                                                                                                                                                                                                                                                                                                                                                                                                                                                                                                                                                                                                                                                                                                                                                                                                                                                                                                                                                                                                                                                                                                                                                                                                                                                                                                                                                                                                                                                                                                                                                                                                                                                                                                                                                                                                                                                                                                                                                                                                                                                                                                                                                                                                                                                                                                                                                                                                                                                                                                                                                                                                                                                                                                                                                                                                                                                                                                                                                                                                                                                                                                                                                                                                                                                                                                                                                                                                                                                                                                                                                                                                                                                                                                                                                                                                                                                                                                                                                                                                                                                                                                                                                                                                                                                                                                                                                                                                                                                                                                                                                                                                                                                                                                                                                                                                                                                                                                                                                                                                                                                                                                                                                                                                                                                                                                                                                                                                                                                                                                                                                                                                                                                                                                                                                                                                                                                                                                                                                                                                                                                                                                                                                                                                                                                                                                                                                                                                                                                                                                                                                                                                                                                                                                                                                                                                                                                                                                                                                                                                                                                                                                                                                                                                                                                                                                                                                                                                                                                                                                                                                                                                                                                                                                                                                                                                                                                                                                                                                                                                                                                                                                                                                                                                                                                                                                                                                                                                                                                                                                                                                                                                                                                                                                                                                                                                                                                                                                                                                                                                                                                                                                                                                                                                                                                                                                                                                                                                                                                                                                                                                                                                                                                                                                                                                                                                                                                                                                                                                                                                                                                                                                                                                                                     | 74                         | 58679              | 5.51            | 9                            | 4                                        | 4                              | 2                                          | 4                                     | 0.23                           | 0.26               |
| TPD52L2_HUMAN         | Tumor protein D54                                                                                                                                                                                                                                                                                                                                                                                                                                                                                                                                                                                                                                                                                                                                                                                                                                                                                                                                                                                                                                                                                                                                                                                                                                                                                                                                                                                                                                                                                                                                                                                                                                                                                                                                                                                                                                                                                                                                                                                                                                                                                                                                                                                                                                                                                                                                                                                                                                                                                                                                                                                                                                                                                                                                                                                                                                                                                                                                                                                                                                                                                                                                                                                                                                                                                                                                                                                                                                                                                                                                                                                                                                                                                                                                                                                                                                                                                                                                                                                                                                                                                                                                                                                                                                                                                                                                                                                                                                                                                                                                                                                                                                                                                                                                                                                                                                                                                                                                                                                                                                                                                                                                                                                                                                                                                                                                                                                                                                                                                                                                                                                                                                                                                                                                                                                                                                                                                                                                                                                                                                                                                                                                                                                                                                                                                                                                                                                                                                                                                                                                                                                                                                                                                                                                                                                                                                                                                                                                                                                                                                                                                                                                                                                                                                                                                                                                                                                                                                                                                                                                                                                                                                                                                                                                                                                                                                                                                                                                                                                                                                                                                                                                                                                                                                                                                                                                                                                                                                                                                                                                                                                                                                                                                                                                                                                                                                                                                                                                                                                                                                                                                                                                                                                                                                                                                                                                                                                                                                                                                                                                                                                                                                                                                                                                                                                                                                                                                                                                                                                                                                                                                                                                                                                                                                                                                                                                                                                                                                                                                                                                                                                                                                                                                                                                                                                                                                                                                                                                                                                                                            | 73                         | 22224              | 5.26            | 7                            | 3                                        | 3                              | 2                                          | 3                                     | 0.33                           | 0.75               |
| C24A_HUMAN            | C24 antigen                                                                                                                                                                                                                                                                                                                                                                                                                                                                                                                                                                                                                                                                                                                                                                                                                                                                                                                                                                                                                                                                                                                                                                                                                                                                                                                                                                                                                                                                                                                                                                                                                                                                                                                                                                                                                                                                                                                                                                                                                                                                                                                                                                                                                                                                                                                                                                                                                                                                                                                                                                                                                                                                                                                                                                                                                                                                                                                                                                                                                                                                                                                                                                                                                                                                                                                                                                                                                                                                                                                                                                                                                                                                                                                                                                                                                                                                                                                                                                                                                                                                                                                                                                                                                                                                                                                                                                                                                                                                                                                                                                                                                                                                                                                                                                                                                                                                                                                                                                                                                                                                                                                                                                                                                                                                                                                                                                                                                                                                                                                                                                                                                                                                                                                                                                                                                                                                                                                                                                                                                                                                                                                                                                                                                                                                                                                                                                                                                                                                                                                                                                                                                                                                                                                                                                                                                                                                                                                                                                                                                                                                                                                                                                                                                                                                                                                                                                                                                                                                                                                                                                                                                                                                                                                                                                                                                                                                                                                                                                                                                                                                                                                                                                                                                                                                                                                                                                                                                                                                                                                                                                                                                                                                                                                                                                                                                                                                                                                                                                                                                                                                                                                                                                                                                                                                                                                                                                                                                                                                                                                                                                                                                                                                                                                                                                                                                                                                                                                                                                                                                                                                                                                                                                                                                                                                                                                                                                                                                                                                                                                                                                                                                                                                                                                                                                                                                                                                                                                                                                                                                                  | 73                         | 61467              | 5.13            | 2                            | 2                                        | 2                              | 2                                          | 2                                     | 0.04                           | 0.11               |
| RFA2L2_HUMAN          | Radical protein A 32 kDa subunit                                                                                                                                                                                                                                                                                                                                                                                                                                                                                                                                                                                                                                                                                                                                                                                                                                                                                                                                                                                                                                                                                                                                                                                                                                                                                                                                                                                                                                                                                                                                                                                                                                                                                                                                                                                                                                                                                                                                                                                                                                                                                                                                                                                                                                                                                                                                                                                                                                                                                                                                                                                                                                                                                                                                                                                                                                                                                                                                                                                                                                                                                                                                                                                                                                                                                                                                                                                                                                                                                                                                                                                                                                                                                                                                                                                                                                                                                                                                                                                                                                                                                                                                                                                                                                                                                                                                                                                                                                                                                                                                                                                                                                                                                                                                                                                                                                                                                                                                                                                                                                                                                                                                                                                                                                                                                                                                                                                                                                                                                                                                                                                                                                                                                                                                                                                                                                                                                                                                                                                                                                                                                                                                                                                                                                                                                                                                                                                                                                                                                                                                                                                                                                                                                                                                                                                                                                                                                                                                                                                                                                                                                                                                                                                                                                                                                                                                                                                                                                                                                                                                                                                                                                                                                                                                                                                                                                                                                                                                                                                                                                                                                                                                                                                                                                                                                                                                                                                                                                                                                                                                                                                                                                                                                                                                                                                                                                                                                                                                                                                                                                                                                                                                                                                                                                                                                                                                                                                                                                                                                                                                                                                                                                                                                                                                                                                                                                                                                                                                                                                                                                                                                                                                                                                                                                                                                                                                                                                                                                                                                                                                                                                                                                                                                                                                                                                                                                                                                                                                                                                                             | 72                         | 29228              | 5.75            | 6                            | 2                                        | 4                              | 1                                          | 4                                     | 0.31                           | 0.15               |
| TTIP2L_HUMAN          | Tricarboxylate transport protein, mitochondrial                                                                                                                                                                                                                                                                                                                                                                                                                                                                                                                                                                                                                                                                                                                                                                                                                                                                                                                                                                                                                                                                                                                                                                                                                                                                                                                                                                                                                                                                                                                                                                                                                                                                                                                                                                                                                                                                                                                                                                                                                                                                                                                                                                                                                                                                                                                                                                                                                                                                                                                                                                                                                                                                                                                                                                                                                                                                                                                                                                                                                                                                                                                                                                                                                                                                                                                                                                                                                                                                                                                                                                                                                                                                                                                                                                                                                                                                                                                                                                                                                                                                                                                                                                                                                                                                                                                                                                                                                                                                                                                                                                                                                                                                                                                                                                                                                                                                                                                                                                                                                                                                                                                                                                                                                                                                                                                                                                                                                                                                                                                                                                                                                                                                                                                                                                                                                                                                                                                                                                                                                                                                                                                                                                                                                                                                                                                                                                                                                                                                                                                                                                                                                                                                                                                                                                                                                                                                                                                                                                                                                                                                                                                                                                                                                                                                                                                                                                                                                                                                                                                                                                                                                                                                                                                                                                                                                                                                                                                                                                                                                                                                                                                                                                                                                                                                                                                                                                                                                                                                                                                                                                                                                                                                                                                                                                                                                                                                                                                                                                                                                                                                                                                                                                                                                                                                                                                                                                                                                                                                                                                                                                                                                                                                                                                                                                                                                                                                                                                                                                                                                                                                                                                                                                                                                                                                                                                                                                                                                                                                                                                                                                                                                                                                                                                                                                                                                                                                                                                                                                                              | 72                         | 33951              | 9.91            | 9                            | 3                                        | 4                              | 2                                          | 4                                     | 0.22                           | 0.28               |
| CHM8L_HUMAN           | Charged multivesicular body protein 4b                                                                                                                                                                                                                                                                                                                                                                                                                                                                                                                                                                                                                                                                                                                                                                                                                                                                                                                                                                                                                                                                                                                                                                                                                                                                                                                                                                                                                                                                                                                                                                                                                                                                                                                                                                                                                                                                                                                                                                                                                                                                                                                                                                                                                                                                                                                                                                                                                                                                                                                                                                                                                                                                                                                                                                                                                                                                                                                                                                                                                                                                                                                                                                                                                                                                                                                                                                                                                                                                                                                                                                                                                                                                                                                                                                                                                                                                                                                                                                                                                                                                                                                                                                                                                                                                                                                                                                                                                                                                                                                                                                                                                                                                                                                                                                                                                                                                                                                                                                                                                                                                                                                                                                                                                                                                                                                                                                                                                                                                                                                                                                                                                                                                                                                                                                                                                                                                                                                                                                                                                                                                                                                                                                                                                                                                                                                                                                                                                                                                                                                                                                                                                                                                                                                                                                                                                                                                                                                                                                                                                                                                                                                                                                                                                                                                                                                                                                                                                                                                                                                                                                                                                                                                                                                                                                                                                                                                                                                                                                                                                                                                                                                                                                                                                                                                                                                                                                                                                                                                                                                                                                                                                                                                                                                                                                                                                                                                                                                                                                                                                                                                                                                                                                                                                                                                                                                                                                                                                                                                                                                                                                                                                                                                                                                                                                                                                                                                                                                                                                                                                                                                                                                                                                                                                                                                                                                                                                                                                                                                                                                                                                                                                                                                                                                                                                                                                                                                                                                                                                                                       | 72                         | 24935              | 4.26            | 2                            | 2                                        | 2                              | 2                                          | 2                                     | 0.19                           | 0.29               |
| COX6A1_HUMAN          | Co-ligand subunit (VI) chain                                                                                                                                                                                                                                                                                                                                                                                                                                                                                                                                                                                                                                                                                                                                                                                                                                                                                                                                                                                                                                                                                                                                                                                                                                                                                                                                                                                                                                                                                                                                                                                                                                                                                                                                                                                                                                                                                                                                                                                                                                                                                                                                                                                                                                                                                                                                                                                                                                                                                                                                                                                                                                                                                                                                                                                                                                                                                                                                                                                                                                                                                                                                                                                                                                                                                                                                                                                                                                                                                                                                                                                                                                                                                                                                                                                                                                                                                                                                                                                                                                                                                                                                                                                                                                                                                                                                                                                                                                                                                                                                                                                                                                                                                                                                                                                                                                                                                                                                                                                                                                                                                                                                                                                                                                                                                                                                                                                                                                                                                                                                                                                                                                                                                                                                                                                                                                                                                                                                                                                                                                                                                                                                                                                                                                                                                                                                                                                                                                                                                                                                                                                                                                                                                                                                                                                                                                                                                                                                                                                                                                                                                                                                                                                                                                                                                                                                                                                                                                                                                                                                                                                                                                                                                                                                                                                                                                                                                                                                                                                                                                                                                                                                                                                                                                                                                                                                                                                                                                                                                                                                                                                                                                                                                                                                                                                                                                                                                                                                                                                                                                                                                                                                                                                                                                                                                                                                                                                                                                                                                                                                                                                                                                                                                                                                                                                                                                                                                                                                                                                                                                                                                                                                                                                                                                                                                                                                                                                                                                                                                                                                                                                                                                                                                                                                                                                                                                                                                                                                                                                                                 | 72                         | 183447             | 4.54            | 18                           | 2                                        | 10                             | 2                                          | 10                                    | 0.14                           | 0.05               |
| SPTC2L_HUMAN          | Serine polyketide oxidoreductase 2                                                                                                                                                                                                                                                                                                                                                                                                                                                                                                                                                                                                                                                                                                                                                                                                                                                                                                                                                                                                                                                                                                                                                                                                                                                                                                                                                                                                                                                                                                                                                                                                                                                                                                                                                                                                                                                                                                                                                                                                                                                                                                                                                                                                                                                                                                                                                                                                                                                                                                                                                                                                                                                                                                                                                                                                                                                                                                                                                                                                                                                                                                                                                                                                                                                                                                                                                                                                                                                                                                                                                                                                                                                                                                                                                                                                                                                                                                                                                                                                                                                                                                                                                                                                                                                                                                                                                                                                                                                                                                                                                                                                                                                                                                                                                                                                                                                                                                                                                                                                                                                                                                                                                                                                                                                                                                                                                                                                                                                                                                                                                                                                                                                                                                                                                                                                                                                                                                                                                                                                                                                                                                                                                                                                                                                                                                                                                                                                                                                                                                                                                                                                                                                                                                                                                                                                                                                                                                                                                                                                                                                                                                                                                                                                                                                                                                                                                                                                                                                                                                                                                                                                                                                                                                                                                                                                                                                                                                                                                                                                                                                                                                                                                                                                                                                                                                                                                                                                                                                                                                                                                                                                                                                                                                                                                                                                                                                                                                                                                                                                                                                                                                                                                                                                                                                                                                                                                                                                                                                                                                                                                                                                                                                                                                                                                                                                                                                                                                                                                                                                                                                                                                                                                                                                                                                                                                                                                                                                                                                                                                                                                                                                                                                                                                                                                                                                                                                                                                                                                                                                           | 72                         | 62864              | 7.29            | 3                            | 1                                        | 1                              | 1                                          | 1                                     | 0.13                           | 0.67               |
| HGS_HUMAN             | Hepatocyte growth factor-regulated tyrosine kinase substrate                                                                                                                                                                                                                                                                                                                                                                                                                                                                                                                                                                                                                                                                                                                                                                                                                                                                                                                                                                                                                                                                                                                                                                                                                                                                                                                                                                                                                                                                                                                                                                                                                                                                                                                                                                                                                                                                                                                                                                                                                                                                                                                                                                                                                                                                                                                                                                                                                                                                                                                                                                                                                                                                                                                                                                                                                                                                                                                                                                                                                                                                                                                                                                                                                                                                                                                                                                                                                                                                                                                                                                                                                                                                                                                                                                                                                                                                                                                                                                                                                                                                                                                                                                                                                                                                                                                                                                                                                                                                                                                                                                                                                                                                                                                                                                                                                                                                                                                                                                                                                                                                                                                                                                                                                                                                                                                                                                                                                                                                                                                                                                                                                                                                                                                                                                                                                                                                                                                                                                                                                                                                                                                                                                                                                                                                                                                                                                                                                                                                                                                                                                                                                                                                                                                                                                                                                                                                                                                                                                                                                                                                                                                                                                                                                                                                                                                                                                                                                                                                                                                                                                                                                                                                                                                                                                                                                                                                                                                                                                                                                                                                                                                                                                                                                                                                                                                                                                                                                                                                                                                                                                                                                                                                                                                                                                                                                                                                                                                                                                                                                                                                                                                                                                                                                                                                                                                                                                                                                                                                                                                                                                                                                                                                                                                                                                                                                                                                                                                                                                                                                                                                                                                                                                                                                                                                                                                                                                                                                                                                                                                                                                                                                                                                                                                                                                                                                                                                                                                                                                                 | 72                         | 86138              | 5.84            | 7                            | 4                                        | 3                              | 2                                          | 3                                     | 0.08                           | 0.7                |
| VASP_HUMAN            | Vasodilator-stimulated phosphoprotein                                                                                                                                                                                                                                                                                                                                                                                                                                                                                                                                                                                                                                                                                                                                                                                                                                                                                                                                                                                                                                                                                                                                                                                                                                                                                                                                                                                                                                                                                                                                                                                                                                                                                                                                                                                                                                                                                                                                                                                                                                                                                                                                                                                                                                                                                                                                                                                                                                                                                                                                                                                                                                                                                                                                                                                                                                                                                                                                                                                                                                                                                                                                                                                                                                                                                                                                                                                                                                                                                                                                                                                                                                                                                                                                                                                                                                                                                                                                                                                                                                                                                                                                                                                                                                                                                                                                                                                                                                                                                                                                                                                                                                                                                                                                                                                                                                                                                                                                                                                                                                                                                                                                                                                                                                                                                                                                                                                                                                                                                                                                                                                                                                                                                                                                                                                                                                                                                                                                                                                                                                                                                                                                                                                                                                                                                                                                                                                                                                                                                                                                                                                                                                                                                                                                                                                                                                                                                                                                                                                                                                                                                                                                                                                                                                                                                                                                                                                                                                                                                                                                                                                                                                                                                                                                                                                                                                                                                                                                                                                                                                                                                                                                                                                                                                                                                                                                                                                                                                                                                                                                                                                                                                                                                                                                                                                                                                                                                                                                                                                                                                                                                                                                                                                                                                                                                                                                                                                                                                                                                                                                                                                                                                                                                                                                                                                                                                                                                                                                                                                                                                                                                                                                                                                                                                                                                                                                                                                                                                                                                                                                                                                                                                                                                                                                                                                                                                                                                                                                                                                                        | 72                         | 39805              | 8.05            | 5                            | 2                                        | 4                              | 2                                          | 4                                     | 0.14                           | 0.23               |
| IFM1_HUMAN            | Interferon-induced transmembrane protein 3                                                                                                                                                                                                                                                                                                                                                                                                                                                                                                                                                                                                                                                                                                                                                                                                                                                                                                                                                                                                                                                                                                                                                                                                                                                                                                                                                                                                                                                                                                                                                                                                                                                                                                                                                                                                                                                                                                                                                                                                                                                                                                                                                                                                                                                                                                                                                                                                                                                                                                                                                                                                                                                                                                                                                                                                                                                                                                                                                                                                                                                                                                                                                                                                                                                                                                                                                                                                                                                                                                                                                                                                                                                                                                                                                                                                                                                                                                                                                                                                                                                                                                                                                                                                                                                                                                                                                                                                                                                                                                                                                                                                                                                                                                                                                                                                                                                                                                                                                                                                                                                                                                                                                                                                                                                                                                                                                                                                                                                                                                                                                                                                                                                                                                                                                                                                                                                                                                                                                                                                                                                                                                                                                                                                                                                                                                                                                                                                                                                                                                                                                                                                                                                                                                                                                                                                                                                                                                                                                                                                                                                                                                                                                                                                                                                                                                                                                                                                                                                                                                                                                                                                                                                                                                                                                                                                                                                                                                                                                                                                                                                                                                                                                                                                                                                                                                                                                                                                                                                                                                                                                                                                                                                                                                                                                                                                                                                                                                                                                                                                                                                                                                                                                                                                                                                                                                                                                                                                                                                                                                                                                                                                                                                                                                                                                                                                                                                                                                                                                                                                                                                                                                                                                                                                                                                                                                                                                                                                                                                                                                                                                                                                                                                                                                                                                                                                                                                                                                                                                                                                   | 72                         | 14622              | 6.49            | 2                            | 2                                        | 2                              | 2                                          | 2                                     | 0.38                           | 0.75               |
| SYOC_HUMAN            | Cysteine-mRNA ligase, cytoplasmic                                                                                                                                                                                                                                                                                                                                                                                                                                                                                                                                                                                                                                                                                                                                                                                                                                                                                                                                                                                                                                                                                                                                                                                                                                                                                                                                                                                                                                                                                                                                                                                                                                                                                                                                                                                                                                                                                                                                                                                                                                                                                                                                                                                                                                                                                                                                                                                                                                                                                                                                                                                                                                                                                                                                                                                                                                                                                                                                                                                                                                                                                                                                                                                                                                                                                                                                                                                                                                                                                                                                                                                                                                                                                                                                                                                                                                                                                                                                                                                                                                                                                                                                                                                                                                                                                                                                                                                                                                                                                                                                                                                                                                                                                                                                                                                                                                                                                                                                                                                                                                                                                                                                                                                                                                                                                                                                                                                                                                                                                                                                                                                                                                                                                                                                                                                                                                                                                                                                                                                                                                                                                                                                                                                                                                                                                                                                                                                                                                                                                                                                                                                                                                                                                                                                                                                                                                                                                                                                                                                                                                                                                                                                                                                                                                                                                                                                                                                                                                                                                                                                                                                                                                                                                                                                                                                                                                                                                                                                                                                                                                                                                                                                                                                                                                                                                                                                                                                                                                                                                                                                                                                                                                                                                                                                                                                                                                                                                                                                                                                                                                                                                                                                                                                                                                                                                                                                                                                                                                                                                                                                                                                                                                                                                                                                                                                                                                                                                                                                                                                                                                                                                                                                                                                                                                                                                                                                                                                                                                                                                                                                                                                                                                                                                                                                                                                                                                                                                                                                                                                                            | 72                         | 85419              | 6.31            | 7                            | 3                                        | 4                              | 1                                          | 4                                     | 0.13                           | 0.95               |
| SPR3L_HUMAN           | Protein spastin homolog 1                                                                                                                                                                                                                                                                                                                                                                                                                                                                                                                                                                                                                                                                                                                                                                                                                                                                                                                                                                                                                                                                                                                                                                                                                                                                                                                                                                                                                                                                                                                                                                                                                                                                                                                                                                                                                                                                                                                                                                                                                                                                                                                                                                                                                                                                                                                                                                                                                                                                                                                                                                                                                                                                                                                                                                                                                                                                                                                                                                                                                                                                                                                                                                                                                                                                                                                                                                                                                                                                                                                                                                                                                                                                                                                                                                                                                                                                                                                                                                                                                                                                                                                                                                                                                                                                                                                                                                                                                                                                                                                                                                                                                                                                                                                                                                                                                                                                                                                                                                                                                                                                                                                                                                                                                                                                                                                                                                                                                                                                                                                                                                                                                                                                                                                                                                                                                                                                                                                                                                                                                                                                                                                                                                                                                                                                                                                                                                                                                                                                                                                                                                                                                                                                                                                                                                                                                                                                                                                                                                                                                                                                                                                                                                                                                                                                                                                                                                                                                                                                                                                                                                                                                                                                                                                                                                                                                                                                                                                                                                                                                                                                                                                                                                                                                                                                                                                                                                                                                                                                                                                                                                                                                                                                                                                                                                                                                                                                                                                                                                                                                                                                                                                                                                                                                                                                                                                                                                                                                                                                                                                                                                                                                                                                                                                                                                                                                                                                                                                                                                                                                                                                                                                                                                                                                                                                                                                                                                                                                                                                                                                                                                                                                                                                                                                                                                                                                                                                                                                                                                                                                    | 72                         | 56594              | 6.19            | 3                            | 2                                        | 1                              | 2                                          | 2                                     | 0.06                           | 0.98               |
| QALX_HUMAN            | QAP synthase [Lysine-methyltransferase]                                                                                                                                                                                                                                                                                                                                                                                                                                                                                                                                                                                                                                                                                                                                                                                                                                                                                                                                                                                                                                                                                                                                                                                                                                                                                                                                                                                                                                                                                                                                                                                                                                                                                                                                                                                                                                                                                                                                                                                                                                                                                                                                                                                                                                                                                                                                                                                                                                                                                                                                                                                                                                                                                                                                                                                                                                                                                                                                                                                                                                                                                                                                                                                                                                                                                                                                                                                                                                                                                                                                                                                                                                                                                                                                                                                                                                                                                                                                                                                                                                                                                                                                                                                                                                                                                                                                                                                                                                                                                                                                                                                                                                                                                                                                                                                                                                                                                                                                                                                                                                                                                                                                                                                                                                                                                                                                                                                                                                                                                                                                                                                                                                                                                                                                                                                                                                                                                                                                                                                                                                                                                                                                                                                                                                                                                                                                                                                                                                                                                                                                                                                                                                                                                                                                                                                                                                                                                                                                                                                                                                                                                                                                                                                                                                                                                                                                                                                                                                                                                                                                                                                                                                                                                                                                                                                                                                                                                                                                                                                                                                                                                                                                                                                                                                                                                                                                                                                                                                                                                                                                                                                                                                                                                                                                                                                                                                                                                                                                                                                                                                                                                                                                                                                                                                                                                                                                                                                                                                                                                                                                                                                                                                                                                                                                                                                                                                                                                                                                                                                                                                                                                                                                                                                                                                                                                                                                                                                                                                                                                                                                                                                                                                                                                                                                                                                                                                                                                                                                                                                                      | 71                         | 76887              | 8.42            | 3                            | 2                                        | 3                              | 2                                          | 3                                     | 0.13                           | 0.12               |
| VATL_HUMAN            | V-type proton ATPase 16 kDa proteolipid subunit                                                                                                                                                                                                                                                                                                                                                                                                                                                                                                                                                                                                                                                                                                                                                                                                                                                                                                                                                                                                                                                                                                                                                                                                                                                                                                                                                                                                                                                                                                                                                                                                                                                                                                                                                                                                                                                                                                                                                                                                                                                                                                                                                                                                                                                                                                                                                                                                                                                                                                                                                                                                                                                                                                                                                                                                                                                                                                                                                                                                                                                                                                                                                                                                                                                                                                                                                                                                                                                                                                                                                                                                                                                                                                                                                                                                                                                                                                                                                                                                                                                                                                                                                                                                                                                                                                                                                                                                                                                                                                                                                                                                                                                                                                                                                                                                                                                                                                                                                                                                                                                                                                                                                                                                                                                                                                                                                                                                                                                                                                                                                                                                                                                                                                                                                                                                                                                                                                                                                                                                                                                                                                                                                                                                                                                                                                                                                                                                                                                                                                                                                                                                                                                                                                                                                                                                                                                                                                                                                                                                                                                                                                                                                                                                                                                                                                                                                                                                                                                                                                                                                                                                                                                                                                                                                                                                                                                                                                                                                                                                                                                                                                                                                                                                                                                                                                                                                                                                                                                                                                                                                                                                                                                                                                                                                                                                                                                                                                                                                                                                                                                                                                                                                                                                                                                                                                                                                                                                                                                                                                                                                                                                                                                                                                                                                                                                                                                                                                                                                                                                                                                                                                                                                                                                                                                                                                                                                                                                                                                                                                                                                                                                                                                                                                                                                                                                                                                                                                                                                                                              | 71                         | 15725              | 7.88            | 3                            | 3                                        | 1                              | 1                                          | 1                                     | 0.2                            | 0.3                |
| YDZAL_HUMAN           | Histone H2A type 2-A                                                                                                                                                                                                                                                                                                                                                                                                                                                                                                                                                                                                                                                                                                                                                                                                                                                                                                                                                                                                                                                                                                                                                                                                                                                                                                                                                                                                                                                                                                                                                                                                                                                                                                                                                                                                                                                                                                                                                                                                                                                                                                                                                                                                                                                                                                                                                                                                                                                                                                                                                                                                                                                                                                                                                                                                                                                                                                                                                                                                                                                                                                                                                                                                                                                                                                                                                                                                                                                                                                                                                                                                                                                                                                                                                                                                                                                                                                                                                                                                                                                                                                                                                                                                                                                                                                                                                                                                                                                                                                                                                                                                                                                                                                                                                                                                                                                                                                                                                                                                                                                                                                                                                                                                                                                                                                                                                                                                                                                                                                                                                                                                                                                                                                                                                                                                                                                                                                                                                                                                                                                                                                                                                                                                                                                                                                                                                                                                                                                                                                                                                                                                                                                                                                                                                                                                                                                                                                                                                                                                                                                                                                                                                                                                                                                                                                                                                                                                                                                                                                                                                                                                                                                                                                                                                                                                                                                                                                                                                                                                                                                                                                                                                                                                                                                                                                                                                                                                                                                                                                                                                                                                                                                                                                                                                                                                                                                                                                                                                                                                                                                                                                                                                                                                                                                                                                                                                                                                                                                                                                                                                                                                                                                                                                                                                                                                                                                                                                                                                                                                                                                                                                                                                                                                                                                                                                                                                                                                                                                                                                                                                                                                                                                                                                                                                                                                                                                                                                                                                                                                                         | 71                         | 14087              | 10.9            | 3                            | 3                                        | 1                              | 1                                          | 1                                     | 0.22                           | 0.24               |
| LMNA_HUMAN            | Protein A-C                                                                                                                                                                                                                                                                                                                                                                                                                                                                                                                                                                                                                                                                                                                                                                                                                                                                                                                                                                                                                                                                                                                                                                                                                                                                                                                                                                                                                                                                                                                                                                                                                                                                                                                                                                                                                                                                                                                                                                                                                                                                                                                                                                                                                                                                                                                                                                                                                                                                                                                                                                                                                                                                                                                                                                                                                                                                                                                                                                                                                                                                                                                                                                                                                                                                                                                                                                                                                                                                                                                                                                                                                                                                                                                                                                                                                                                                                                                                                                                                                                                                                                                                                                                                                                                                                                                                                                                                                                                                                                                                                                                                                                                                                                                                                                                                                                                                                                                                                                                                                                                                                                                                                                                                                                                                                                                                                                                                                                                                                                                                                                                                                                                                                                                                                                                                                                                                                                                                                                                                                                                                                                                                                                                                                                                                                                                                                                                                                                                                                                                                                                                                                                                                                                                                                                                                                                                                                                                                                                                                                                                                                                                                                                                                                                                                                                                                                                                                                                                                                                                                                                                                                                                                                                                                                                                                                                                                                                                                                                                                                                                                                                                                                                                                                                                                                                                                                                                                                                                                                                                                                                                                                                                                                                                                                                                                                                                                                                                                                                                                                                                                                                                                                                                                                                                                                                                                                                                                                                                                                                                                                                                                                                                                                                                                                                                                                                                                                                                                                                                                                                                                                                                                                                                                                                                                                                                                                                                                                                                                                                                                                                                                                                                                                                                                                                                                                                                                                                                                                                                                                                  | 71                         | 74085              | 6.57            | 10                           | 3                                        | 6                              | 2                                          | 6                                     | 0.15                           | 0.12               |
| OKAP5_HUMAN           | Osteoklaster-associated protein 5                                                                                                                                                                                                                                                                                                                                                                                                                                                                                                                                                                                                                                                                                                                                                                                                                                                                                                                                                                                                                                                                                                                                                                                                                                                                                                                                                                                                                                                                                                                                                                                                                                                                                                                                                                                                                                                                                                                                                                                                                                                                                                                                                                                                                                                                                                                                                                                                                                                                                                                                                                                                                                                                                                                                                                                                                                                                                                                                                                                                                                                                                                                                                                                                                                                                                                                                                                                                                                                                                                                                                                                                                                                                                                                                                                                                                                                                                                                                                                                                                                                                                                                                                                                                                                                                                                                                                                                                                                                                                                                                                                                                                                                                                                                                                                                                                                                                                                                                                                                                                                                                                                                                                                                                                                                                                                                                                                                                                                                                                                                                                                                                                                                                                                                                                                                                                                                                                                                                                                                                                                                                                                                                                                                                                                                                                                                                                                                                                                                                                                                                                                                                                                                                                                                                                                                                                                                                                                                                                                                                                                                                                                                                                                                                                                                                                                                                                                                                                                                                                                                                                                                                                                                                                                                                                                                                                                                                                                                                                                                                                                                                                                                                                                                                                                                                                                                                                                                                                                                                                                                                                                                                                                                                                                                                                                                                                                                                                                                                                                                                                                                                                                                                                                                                                                                                                                                                                                                                                                                                                                                                                                                                                                                                                                                                                                                                                                                                                                                                                                                                                                                                                                                                                                                                                                                                                                                                                                                                                                                                                                                                                                                                                                                                                                                                                                                                                                                                                                                                                                                                            | 71                         | 22352              | 7.85            | 6                            | 2                                        | 6                              | 2                                          | 6                                     | 0.05                           | 0.64               |
| ABR7L2_HUMAN          | Aldehyde B1 aldehyde reductase member 2                                                                                                                                                                                                                                                                                                                                                                                                                                                                                                                                                                                                                                                                                                                                                                                                                                                                                                                                                                                                                                                                                                                                                                                                                                                                                                                                                                                                                                                                                                                                                                                                                                                                                                                                                                                                                                                                                                                                                                                                                                                                                                                                                                                                                                                                                                                                                                                                                                                                                                                                                                                                                                                                                                                                                                                                                                                                                                                                                                                                                                                                                                                                                                                                                                                                                                                                                                                                                                                                                                                                                                                                                                                                                                                                                                                                                                                                                                                                                                                                                                                                                                                                                                                                                                                                                                                                                                                                                                                                                                                                                                                                                                                                                                                                                                                                                                                                                                                                                                                                                                                                                                                                                                                                                                                                                                                                                                                                                                                                                                                                                                                                                                                                                                                                                                                                                                                                                                                                                                                                                                                                                                                                                                                                                                                                                                                                                                                                                                                                                                                                                                                                                                                                                                                                                                                                                                                                                                                                                                                                                                                                                                                                                                                                                                                                                                                                                                                                                                                                                                                                                                                                                                                                                                                                                                                                                                                                                                                                                                                                                                                                                                                                                                                                                                                                                                                                                                                                                                                                                                                                                                                                                                                                                                                                                                                                                                                                                                                                                                                                                                                                                                                                                                                                                                                                                                                                                                                                                                                                                                                                                                                                                                                                                                                                                                                                                                                                                                                                                                                                                                                                                                                                                                                                                                                                                                                                                                                                                                                                                                                                                                                                                                                                                                                                                                                                                                                                                                                                                                                                      | 71                         | 29564              | 6.7             | 5                            | 3                                        | 2                              | 2                                          | 2                                     | 0.14                           | 0.23               |
| ACPH_HUMAN            | Acyl-CoA oxidase                                                                                                                                                                                                                                                                                                                                                                                                                                                                                                                                                                                                                                                                                                                                                                                                                                                                                                                                                                                                                                                                                                                                                                                                                                                                                                                                                                                                                                                                                                                                                                                                                                                                                                                                                                                                                                                                                                                                                                                                                                                                                                                                                                                                                                                                                                                                                                                                                                                                                                                                                                                                                                                                                                                                                                                                                                                                                                                                                                                                                                                                                                                                                                                                                                                                                                                                                                                                                                                                                                                                                                                                                                                                                                                                                                                                                                                                                                                                                                                                                                                                                                                                                                                                                                                                                                                                                                                                                                                                                                                                                                                                                                                                                                                                                                                                                                                                                                                                                                                                                                                                                                                                                                                                                                                                                                                                                                                                                                                                                                                                                                                                                                                                                                                                                                                                                                                                                                                                                                                                                                                                                                                                                                                                                                                                                                                                                                                                                                                                                                                                                                                                                                                                                                                                                                                                                                                                                                                                                                                                                                                                                                                                                                                                                                                                                                                                                                                                                                                                                                                                                                                                                                                                                                                                                                                                                                                                                                                                                                                                                                                                                                                                                                                                                                                                                                                                                                                                                                                                                                                                                                                                                                                                                                                                                                                                                                                                                                                                                                                                                                                                                                                                                                                                                                                                                                                                                                                                                                                                                                                                                                                                                                                                                                                                                                                                                                                                                                                                                                                                                                                                                                                                                                                                                                                                                                                                                                                                                                                                                                                                                                                                                                                                                                                                                                                                                                                                                                                                                                                                                             | 70                         | 81173              | 5.29            | 9                            | 3                                        | 6                              | 3                                          | 6                                     | 0.17                           | 0.17               |
| MMS1L_HUMAN           | MMS1 nucleotide excision repair protein homolog                                                                                                                                                                                                                                                                                                                                                                                                                                                                                                                                                                                                                                                                                                                                                                                                                                                                                                                                                                                                                                                                                                                                                                                                                                                                                                                                                                                                                                                                                                                                                                                                                                                                                                                                                                                                                                                                                                                                                                                                                                                                                                                                                                                                                                                                                                                                                                                                                                                                                                                                                                                                                                                                                                                                                                                                                                                                                                                                                                                                                                                                                                                                                                                                                                                                                                                                                                                                                                                                                                                                                                                                                                                                                                                                                                                                                                                                                                                                                                                                                                                                                                                                                                                                                                                                                                                                                                                                                                                                                                                                                                                                                                                                                                                                                                                                                                                                                                                                                                                                                                                                                                                                                                                                                                                                                                                                                                                                                                                                                                                                                                                                                                                                                                                                                                                                                                                                                                                                                                                                                                                                                                                                                                                                                                                                                                                                                                                                                                                                                                                                                                                                                                                                                                                                                                                                                                                                                                                                                                                                                                                                                                                                                                                                                                                                                                                                                                                                                                                                                                                                                                                                                                                                                                                                                                                                                                                                                                                                                                                                                                                                                                                                                                                                                                                                                                                                                                                                                                                                                                                                                                                                                                                                                                                                                                                                                                                                                                                                                                                                                                                                                                                                                                                                                                                                                                                                                                                                                                                                                                                                                                                                                                                                                                                                                                                                                                                                                                                                                                                                                                                                                                                                                                                                                                                                                                                                                                                                                                                                                                                                                                                                                                                                                                                                                                                                                                                                                                                                                                                              | 70                         | 113217             | 5.82            | 5                            | 2                                        | 4                              | 1                                          | 4                                     | 0.07                           | 0.84               |
| RPB1L_HUMAN           | DNA-directed RNA polymerase II subunit RPB1 l-rs1                                                                                                                                                                                                                                                                                                                                                                                                                                                                                                                                                                                                                                                                                                                                                                                                                                                                                                                                                                                                                                                                                                                                                                                                                                                                                                                                                                                                                                                                                                                                                                                                                                                                                                                                                                                                                                                                                                                                                                                                                                                                                                                                                                                                                                                                                                                                                                                                                                                                                                                                                                                                                                                                                                                                                                                                                                                                                                                                                                                                                                                                                                                                                                                                                                                                                                                                                                                                                                                                                                                                                                                                                                                                                                                                                                                                                                                                                                                                                                                                                                                                                                                                                                                                                                                                                                                                                                                                                                                                                                                                                                                                                                                                                                                                                                                                                                                                                                                                                                                                                                                                                                                                                                                                                                                                                                                                                                                                                                                                                                                                                                                                                                                                                                                                                                                                                                                                                                                                                                                                                                                                                                                                                                                                                                                                                                                                                                                                                                                                                                                                                                                                                                                                                                                                                                                                                                                                                                                                                                                                                                                                                                                                                                                                                                                                                                                                                                                                                                                                                                                                                                                                                                                                                                                                                                                                                                                                                                                                                                                                                                                                                                                                                                                                                                                                                                                                                                                                                                                                                                                                                                                                                                                                                                                                                                                                                                                                                                                                                                                                                                                                                                                                                                                                                                                                                                                                                                                                                                                                                                                                                                                                                                                                                                                                                                                                                                                                                                                                                                                                                                                                                                                                                                                                                                                                                                                                                                                                                                                                                                                                                                                                                                                                                                                                                                                                                                                                                                                                                                                            | 70                         | 13080              | 6.28            | 5                            | 4                                        | 1                              | 1                                          | 1                                     | 0.26                           | 0.88               |
| TMOD3_HUMAN           | Tropomodulin-3                                                                                                                                                                                                                                                                                                                                                                                                                                                                                                                                                                                                                                                                                                                                                                                                                                                                                                                                                                                                                                                                                                                                                                                                                                                                                                                                                                                                                                                                                                                                                                                                                                                                                                                                                                                                                                                                                                                                                                                                                                                                                                                                                                                                                                                                                                                                                                                                                                                                                                                                                                                                                                                                                                                                                                                                                                                                                                                                                                                                                                                                                                                                                                                                                                                                                                                                                                                                                                                                                                                                                                                                                                                                                                                                                                                                                                                                                                                                                                                                                                                                                                                                                                                                                                                                                                                                                                                                                                                                                                                                                                                                                                                                                                                                                                                                                                                                                                                                                                                                                                                                                                                                                                                                                                                                                                                                                                                                                                                                                                                                                                                                                                                                                                                                                                                                                                                                                                                                                                                                                                                                                                                                                                                                                                                                                                                                                                                                                                                                                                                                                                                                                                                                                                                                                                                                                                                                                                                                                                                                                                                                                                                                                                                                                                                                                                                                                                                                                                                                                                                                                                                                                                                                                                                                                                                                                                                                                                                                                                                                                                                                                                                                                                                                                                                                                                                                                                                                                                                                                                                                                                                                                                                                                                                                                                                                                                                                                                                                                                                                                                                                                                                                                                                                                                                                                                                                                                                                                                                                                                                                                                                                                                                                                                                                                                                                                                                                                                                                                                                                                                                                                                                                                                                                                                                                                                                                                                                                                                                                                                                                                                                                                                                                                                                                                                                                                                                                                                                                                                                                                               | 70                         | 38570              | 5.86            | 10                           | 6                                        | 3                              | 2                                          | 3                                     | 0.24                           | 0.37               |
| UCBL1_HUMAN           | Putative cytochrome b-c1 complex subunit Rbx1a-Ba protein 1                                                                                                                                                                                                                                                                                                                                                                                                                                                                                                                                                                                                                                                                                                                                                                                                                                                                                                                                                                                                                                                                                                                                                                                                                                                                                                                                                                                                                                                                                                                                                                                                                                                                                                                                                                                                                                                                                                                                                                                                                                                                                                                                                                                                                                                                                                                                                                                                                                                                                                                                                                                                                                                                                                                                                                                                                                                                                                                                                                                                                                                                                                                                                                                                                                                                                                                                                                                                                                                                                                                                                                                                                                                                                                                                                                                                                                                                                                                                                                                                                                                                                                                                                                                                                                                                                                                                                                                                                                                                                                                                                                                                                                                                                                                                                                                                                                                                                                                                                                                                                                                                                                                                                                                                                                                                                                                                                                                                                                                                                                                                                                                                                                                                                                                                                                                                                                                                                                                                                                                                                                                                                                                                                                                                                                                                                                                                                                                                                                                                                                                                                                                                                                                                                                                                                                                                                                                                                                                                                                                                                                                                                                                                                                                                                                                                                                                                                                                                                                                                                                                                                                                                                                                                                                                                                                                                                                                                                                                                                                                                                                                                                                                                                                                                                                                                                                                                                                                                                                                                                                                                                                                                                                                                                                                                                                                                                                                                                                                                                                                                                                                                                                                                                                                                                                                                                                                                                                                                                                                                                                                                                                                                                                                                                                                                                                                                                                                                                                                                                                                                                                                                                                                                                                                                                                                                                                                                                                                                                                                                                                                                                                                                                                                                                                                                                                                                                                                                                                                                                                                  | 70                         | 30786              | 9.04            | 1                            | 1                                        | 1                              | 1                                          | 1                                     | 0.07                           | 0.14               |
| SCRB1_HUMAN           | Scavenger receptor class B member 1                                                                                                                                                                                                                                                                                                                                                                                                                                                                                                                                                                                                                                                                                                                                                                                                                                                                                                                                                                                                                                                                                                                                                                                                                                                                                                                                                                                                                                                                                                                                                                                                                                                                                                                                                                                                                                                                                                                                                                                                                                                                                                                                                                                                                                                                                                                                                                                                                                                                                                                                                                                                                                                                                                                                                                                                                                                                                                                                                                                                                                                                                                                                                                                                                                                                                                                                                                                                                                                                                                                                                                                                                                                                                                                                                                                                                                                                                                                                                                                                                                                                                                                                                                                                                                                                                                                                                                                                                                                                                                                                                                                                                                                                                                                                                                                                                                                                                                                                                                                                                                                                                                                                                                                                                                                                                                                                                                                                                                                                                                                                                                                                                                                                                                                                                                                                                                                                                                                                                                                                                                                                                                                                                                                                                                                                                                                                                                                                                                                                                                                                                                                                                                                                                                                                                                                                                                                                                                                                                                                                                                                                                                                                                                                                                                                                                                                                                                                                                                                                                                                                                                                                                                                                                                                                                                                                                                                                                                                                                                                                                                                                                                                                                                                                                                                                                                                                                                                                                                                                                                                                                                                                                                                                                                                                                                                                                                                                                                                                                                                                                                                                                                                                                                                                                                                                                                                                                                                                                                                                                                                                                                                                                                                                                                                                                                                                                                                                                                                                                                                                                                                                                                                                                                                                                                                                                                                                                                                                                                                                                                                                                                                                                                                                                                                                                                                                                                                                                                                                                                                                          | 70                         | 60838              | 8.55            | 9                            | 2                                        | 5                              | 1                                          | 5                                     | 0.28                           | 0.27               |
| RPL1L_HUMAN           | Dolichyl-4-phosphoUDP-glucosyltransferase subunit 1                                                                                                                                                                                                                                                                                                                                                                                                                                                                                                                                                                                                                                                                                                                                                                                                                                                                                                                                                                                                                                                                                                                                                                                                                                                                                                                                                                                                                                                                                                                                                                                                                                                                                                                                                                                                                                                                                                                                                                                                                                                                                                                                                                                                                                                                                                                                                                                                                                                                                                                                                                                                                                                                                                                                                                                                                                                                                                                                                                                                                                                                                                                                                                                                                                                                                                                                                                                                                                                                                                                                                                                                                                                                                                                                                                                                                                                                                                                                                                                                                                                                                                                                                                                                                                                                                                                                                                                                                                                                                                                                                                                                                                                                                                                                                                                                                                                                                                                                                                                                                                                                                                                                                                                                                                                                                                                                                                                                                                                                                                                                                                                                                                                                                                                                                                                                                                                                                                                                                                                                                                                                                                                                                                                                                                                                                                                                                                                                                                                                                                                                                                                                                                                                                                                                                                                                                                                                                                                                                                                                                                                                                                                                                                                                                                                                                                                                                                                                                                                                                                                                                                                                                                                                                                                                                                                                                                                                                                                                                                                                                                                                                                                                                                                                                                                                                                                                                                                                                                                                                                                                                                                                                                                                                                                                                                                                                                                                                                                                                                                                                                                                                                                                                                                                                                                                                                                                                                                                                                                                                                                                                                                                                                                                                                                                                                                                                                                                                                                                                                                                                                                                                                                                                                                                                                                                                                                                                                                                                                                                                                                                                                                                                                                                                                                                                                                                                                                                                                                                                                                          | 70                         | 68527              | 5.86            | 27                           | 11                                       | 10                             | 4                                          | 10                                    | 0.29                           | 0.28               |
| MGAT1_HUMAN           | Alcohol 1-mannosyl-2-oxo-3-oxo-4-oxo-5-oxo-6-oxo-7-oxo-8-oxo-9-oxo-10-oxo-11-oxo-12-oxo-13-oxo-14-oxo-15-oxo-16-oxo-17-oxo-18-oxo-19-oxo-20-oxo-21-oxo-22-oxo-23-oxo-24-oxo-25-oxo-26-oxo-27-oxo-28-oxo-29-oxo-30-oxo-31-oxo-32-oxo-33-oxo-34-oxo-35-oxo-36-oxo-37-oxo-38-oxo-39-oxo-40-oxo-41-oxo-42-oxo-43-oxo-44-oxo-45-oxo-46-oxo-47-oxo-48-oxo-49-oxo-50-oxo-51-oxo-52-oxo-53-oxo-54-oxo-55-oxo-56-oxo-57-oxo-58-oxo-59-oxo-60-oxo-61-oxo-62-oxo-63-oxo-64-oxo-65-oxo-66-oxo-67-oxo-68-oxo-69-oxo-70-oxo-71-oxo-72-oxo-73-oxo-74-oxo-75-oxo-76-oxo-77-oxo-78-oxo-79-oxo-80-oxo-81-oxo-82-oxo-83-oxo-84-oxo-85-oxo-86-oxo-87-oxo-88-oxo-89-oxo-90-oxo-91-oxo-92-oxo-93-oxo-94-oxo-95-oxo-96-oxo-97-oxo-98-oxo-99-oxo-100-oxo-101-oxo-102-oxo-103-oxo-104-oxo-105-oxo-106-oxo-107-oxo-108-oxo-109-oxo-110-oxo-111-oxo-112-oxo-113-oxo-114-oxo-115-oxo-116-oxo-117-oxo-118-oxo-119-oxo-120-oxo-121-oxo-122-oxo-123-oxo-124-oxo-125-oxo-126-oxo-127-oxo-128-oxo-129-oxo-130-oxo-131-oxo-132-oxo-133-oxo-134-oxo-135-oxo-136-oxo-137-oxo-138-oxo-139-oxo-140-oxo-141-oxo-142-oxo-143-oxo-144-oxo-145-oxo-146-oxo-147-oxo-148-oxo-149-oxo-150-oxo-151-oxo-152-oxo-153-oxo-154-oxo-155-oxo-156-oxo-157-oxo-158-oxo-159-oxo-160-oxo-161-oxo-162-oxo-163-oxo-164-oxo-165-oxo-166-oxo-167-oxo-168-oxo-169-oxo-170-oxo-171-oxo-172-oxo-173-oxo-174-oxo-175-oxo-176-oxo-177-oxo-178-oxo-179-oxo-180-oxo-181-oxo-182-oxo-183-oxo-184-oxo-185-oxo-186-oxo-187-oxo-188-oxo-189-oxo-190-oxo-191-oxo-192-oxo-193-oxo-194-oxo-195-oxo-196-oxo-197-oxo-198-oxo-199-oxo-200-oxo-201-oxo-202-oxo-203-oxo-204-oxo-205-oxo-206-oxo-207-oxo-208-oxo-209-oxo-210-oxo-211-oxo-212-oxo-213-oxo-214-oxo-215-oxo-216-oxo-217-oxo-218-oxo-219-oxo-220-oxo-221-oxo-222-oxo-223-oxo-224-oxo-225-oxo-226-oxo-227-oxo-228-oxo-229-oxo-230-oxo-231-oxo-232-oxo-233-oxo-234-oxo-235-oxo-236-oxo-237-oxo-238-oxo-239-oxo-240-oxo-241-oxo-242-oxo-243-oxo-244-oxo-245-oxo-246-oxo-247-oxo-248-oxo-249-oxo-250-oxo-251-oxo-252-oxo-253-oxo-254-oxo-255-oxo-256-oxo-257-oxo-258-oxo-259-oxo-260-oxo-261-oxo-262-oxo-263-oxo-264-oxo-265-oxo-266-oxo-267-oxo-268-oxo-269-oxo-270-oxo-271-oxo-272-oxo-273-oxo-274-oxo-275-oxo-276-oxo-277-oxo-278-oxo-279-oxo-280-oxo-281-oxo-282-oxo-283-oxo-284-oxo-285-oxo-286-oxo-287-oxo-288-oxo-289-oxo-290-oxo-291-oxo-292-oxo-293-oxo-294-oxo-295-oxo-296-oxo-297-oxo-298-oxo-299-oxo-300-oxo-301-oxo-302-oxo-303-oxo-304-oxo-305-oxo-306-oxo-307-oxo-308-oxo-309-oxo-310-oxo-311-oxo-312-oxo-313-oxo-314-oxo-315-oxo-316-oxo-317-oxo-318-oxo-319-oxo-320-oxo-321-oxo-322-oxo-323-oxo-324-oxo-325-oxo-326-oxo-327-oxo-328-oxo-329-oxo-330-oxo-331-oxo-332-oxo-333-oxo-334-oxo-335-oxo-336-oxo-337-oxo-338-oxo-339-oxo-340-oxo-341-oxo-342-oxo-343-oxo-344-oxo-345-oxo-346-oxo-347-oxo-348-oxo-349-oxo-350-oxo-351-oxo-352-oxo-353-oxo-354-oxo-355-oxo-356-oxo-357-oxo-358-oxo-359-oxo-360-oxo-361-oxo-362-oxo-363-oxo-364-oxo-365-oxo-366-oxo-367-oxo-368-oxo-369-oxo-370-oxo-371-oxo-372-oxo-373-oxo-374-oxo-375-oxo-376-oxo-377-oxo-378-oxo-379-oxo-380-oxo-381-oxo-382-oxo-383-oxo-384-oxo-385-oxo-386-oxo-387-oxo-388-oxo-389-oxo-390-oxo-391-oxo-392-oxo-393-oxo-394-oxo-395-oxo-396-oxo-397-oxo-398-oxo-399-oxo-400-oxo-401-oxo-402-oxo-403-oxo-404-oxo-405-oxo-406-oxo-407-oxo-408-oxo-409-oxo-410-oxo-411-oxo-412-oxo-413-oxo-414-oxo-415-oxo-416-oxo-417-oxo-418-oxo-419-oxo-420-oxo-421-oxo-422-oxo-423-oxo-424-oxo-425-oxo-426-oxo-427-oxo-428-oxo-429-oxo-430-oxo-431-oxo-432-oxo-433-oxo-434-oxo-435-oxo-436-oxo-437-oxo-438-oxo-439-oxo-440-oxo-441-oxo-442-oxo-443-oxo-444-oxo-445-oxo-446-oxo-447-oxo-448-oxo-449-oxo-450-oxo-451-oxo-452-oxo-453-oxo-454-oxo-455-oxo-456-oxo-457-oxo-458-oxo-459-oxo-460-oxo-461-oxo-462-oxo-463-oxo-464-oxo-465-oxo-466-oxo-467-oxo-468-oxo-469-oxo-470-oxo-471-oxo-472-oxo-473-oxo-474-oxo-475-oxo-476-oxo-477-oxo-478-oxo-479-oxo-480-oxo-481-oxo-482-oxo-483-oxo-484-oxo-485-oxo-486-oxo-487-oxo-488-oxo-489-oxo-490-oxo-491-oxo-492-oxo-493-oxo-494-oxo-495-oxo-496-oxo-497-oxo-498-oxo-499-oxo-500-oxo-501-oxo-502-oxo-503-oxo-504-oxo-505-oxo-506-oxo-507-oxo-508-oxo-509-oxo-510-oxo-511-oxo-512-oxo-513-oxo-514-oxo-515-oxo-516-oxo-517-oxo-518-oxo-519-oxo-520-oxo-521-oxo-522-oxo-523-oxo-524-oxo-525-oxo-526-oxo-527-oxo-528-oxo-529-oxo-530-oxo-531-oxo-532-oxo-533-oxo-534-oxo-535-oxo-536-oxo-537-oxo-538-oxo-539-oxo-540-oxo-541-oxo-542-oxo-543-oxo-544-oxo-545-oxo-546-oxo-547-oxo-548-oxo-549-oxo-550-oxo-551-oxo-552-oxo-553-oxo-554-oxo-555-oxo-556-oxo-557-oxo-558-oxo-559-oxo-560-oxo-561-oxo-562-oxo-563-oxo-564-oxo-565-oxo-566-oxo-567-oxo-568-oxo-569-oxo-570-oxo-571-oxo-572-oxo-573-oxo-574-oxo-575-oxo-576-oxo-577-oxo-578-oxo-579-oxo-580-oxo-581-oxo-582-oxo-583-oxo-584-oxo-585-oxo-586-oxo-587-oxo-588-oxo-589-oxo-590-oxo-591-oxo-592-oxo-593-oxo-594-oxo-595-oxo-596-oxo-597-oxo-598-oxo-599-oxo-600-oxo-601-oxo-602-oxo-603-oxo-604-oxo-605-oxo-606-oxo-607-oxo-608-oxo-609-oxo-610-oxo-611-oxo-612-oxo-613-oxo-614-oxo-615-oxo-616-oxo-617-oxo-618-oxo-619-oxo-620-oxo-621-oxo-622-oxo-623-oxo-624-oxo-625-oxo-626-oxo-627-oxo-628-oxo-629-oxo-630-oxo-631-oxo-632-oxo-633-oxo-634-oxo-635-oxo-636-oxo-637-oxo-638-oxo-639-oxo-640-oxo-641-oxo-642-oxo-643-oxo-644-oxo-645-oxo-646-oxo-647-oxo-648-oxo-649-oxo-650-oxo-651-oxo-652-oxo-653-oxo-654-oxo-655-oxo-656-oxo-657-oxo-658-oxo-659-oxo-660-oxo-661-oxo-662-oxo-663-oxo-664-oxo-665-oxo-666-oxo-667-oxo-668-oxo-669-oxo-670-oxo-671-oxo-672-oxo-673-oxo-674-oxo-675-oxo-676-oxo-677-oxo-678-oxo-679-oxo-680-oxo-681-oxo-682-oxo-683-oxo-684-oxo-685-oxo-686-oxo-687-oxo-688-oxo-689-oxo-690-oxo-691-oxo-692-oxo-693-oxo-694-oxo-695-oxo-696-oxo-697-oxo-698-oxo-699-oxo-700-oxo-701-oxo-702-oxo-703-oxo-704-oxo-705-oxo-706-oxo-707-oxo-708-oxo-709-oxo-710-oxo-711-oxo-712-oxo-713-oxo-714-oxo-715-oxo-716-oxo-717-oxo-718-oxo-719-oxo-720-oxo-721-oxo-722-oxo-723-oxo-724-oxo-725-oxo-726-oxo-727-oxo-728-oxo-729-oxo-730-oxo-731-oxo-732-oxo-733-oxo-734-oxo-735-oxo-736-oxo-737-oxo-738-oxo-739-oxo-740-oxo-741-oxo-742-oxo-743-oxo-744-oxo-745-oxo-746-oxo-747-oxo-748-oxo-749-oxo-750-oxo-751-oxo-752-oxo-753-oxo-754-oxo-755-oxo-756-oxo-757-oxo-758-oxo-759-oxo-760-oxo-761-oxo-762-oxo-763-oxo-764-oxo-765-oxo-766-oxo-767-oxo-768-oxo-769-oxo-770-oxo-771-oxo-772-oxo-773-oxo-774-oxo-775-oxo-776-oxo-777-oxo-778-oxo-779-oxo-780-oxo-781-oxo-782-oxo-783-oxo-784-oxo-785-oxo-786-oxo-787-oxo-788-oxo-789-oxo-790-oxo-791-oxo-792-oxo-793-oxo-794-oxo-795-oxo-796-oxo-797-oxo-798-oxo-799-oxo-800-oxo-801-oxo-802-oxo-803-oxo-804-oxo-805-oxo-806-oxo-807-oxo-808-oxo-809-oxo-810-oxo-811-oxo-812-oxo-813-oxo-814-oxo-815-oxo-816-oxo-817-oxo-818-oxo-819-oxo-820-oxo-821-oxo-822-oxo-823-oxo-824-oxo-825-oxo-826-oxo-827-oxo-828-oxo-829-oxo-830-oxo-831-oxo-832-oxo-833-oxo-834-oxo-835-oxo-836-oxo-837-oxo-838-oxo-839-oxo-840-oxo-841-oxo-842-oxo-843-oxo-844-oxo-845-oxo-846-oxo-847-oxo-848-oxo-849-oxo-850-oxo-851-oxo-852-oxo-853-oxo-854-oxo-855-oxo-856-oxo-857-oxo-858-oxo-859-oxo-860-oxo-861-oxo-862-oxo-863-oxo-864-oxo-865-oxo-866-oxo-867-oxo-868-oxo-869-oxo-870-oxo-871-oxo-872-oxo-873-oxo-874-oxo-875-oxo-876-oxo-877-oxo-878-oxo-879-oxo-880-oxo-881-oxo-882-oxo-883-oxo-884-oxo-885-oxo-886-oxo-887-oxo-888-oxo-889-oxo-890-oxo-891-oxo-892-oxo-893-oxo-894-oxo-895-oxo-896-oxo-897-oxo-898-oxo-899-oxo-900-oxo-901-oxo-902-oxo-903-oxo-904-oxo-905-oxo-906-oxo-907-oxo-908-oxo-909-oxo-910-oxo-911-oxo-912-oxo-913-oxo-914-oxo-915-oxo-916-oxo-917-oxo-918-oxo-919-oxo-920-oxo-921-oxo-922-oxo-923-oxo-924-oxo-925-oxo-926-oxo-927-oxo-928-oxo-929-oxo-930-oxo-931-oxo-932-oxo-933-oxo-934-oxo-935-oxo-936-oxo-937-oxo-938-oxo-939-oxo-940-oxo-941-oxo-942-oxo-943-oxo-944-oxo-945-oxo-946-oxo-947-oxo-948-oxo-949-oxo-950-oxo-951-oxo-952-oxo-953-oxo-954-oxo-955-oxo-956-oxo-957-oxo-958-oxo-959-oxo-960-oxo-961-oxo-962-oxo-963-oxo-964-oxo-965-oxo-966-oxo-967-oxo-968-oxo-969-oxo-970-oxo-971-oxo-972-oxo-973-oxo-974-oxo-975-oxo-976-oxo-977-oxo-978-oxo-979-oxo-980-oxo-981-oxo-982-oxo-983-oxo-984-oxo-985-oxo-986-oxo-987-oxo-988-oxo-989-oxo-990-oxo-991-oxo-992-oxo-993-oxo-994-oxo-995-oxo-996-oxo-997-oxo-998-oxo-999-oxo-1000-oxo-1001-oxo-1002-oxo-1003-oxo-1004-oxo-1005-oxo-1006-oxo-1007-oxo-1008-oxo-1009-oxo-1010-oxo-1011-oxo-1012-oxo-1013-oxo-1014-oxo-1015-oxo-1016-oxo-1017-oxo-1018-oxo-1019-oxo-1020-oxo-1021-oxo-1022-oxo-1023-oxo-1024-oxo-1025-oxo-1026-oxo-1027-oxo-1028-oxo-1029-oxo-1030-oxo-1031-oxo-1032-oxo-1033-oxo-1034-oxo-1035-oxo-1036-oxo-1037-oxo-1038-oxo-1039-oxo-1040-oxo-1041-oxo-1042-oxo-1043-oxo-1044-oxo-1045-oxo-1046-oxo-1047-oxo-1048-oxo-1049-oxo-1050-oxo-1051-oxo-1052-oxo-1053-oxo-1054-oxo-1055-oxo-1056-oxo-1057-oxo-1058-oxo-1059-oxo-1060-oxo-1061-oxo-1062-oxo-1063-oxo-1064-oxo-1065-oxo-1066-oxo-1067-oxo-1068-oxo-1069-oxo-1070-oxo-1071-oxo-1072-oxo-1073-oxo-1074-oxo-1075-oxo-1076-oxo-1077-oxo-1078-oxo-1079-oxo-1080-oxo-1081-oxo-1082-oxo-1083-oxo-1084-oxo-1085-oxo-1086-oxo-1087-oxo-1088-oxo-1089-oxo-1090-oxo-1091-oxo-1092-oxo-1093-oxo-1094-oxo-1095-oxo-1096-oxo-1097-oxo-1098-oxo-1099-oxo-1100-oxo-1101-oxo-1102-oxo-1103-oxo-1104-oxo-1105-oxo-1106-oxo-1107-oxo-1108-oxo-1109-oxo-1110-oxo-1111-oxo-1112-oxo-1113-oxo-1114-oxo-1115-oxo-1116-oxo-1117-oxo-1118-oxo-1119-oxo-1120-oxo-1121-oxo-1122-oxo-1123-oxo-1124-oxo-1125-oxo-1126-oxo-1127-oxo-1128-oxo-1129-oxo-1130-oxo-1131-oxo-1132-oxo-1133-oxo-1134-oxo-1135-oxo-1136-oxo-1137-oxo-1138-oxo-1139-oxo-1140-oxo-1141-oxo-1142-oxo-1143-oxo-1144-oxo-1145-oxo-1146-oxo-1147-oxo-1148-oxo-1149-oxo-1150-oxo-1151-oxo-1152-oxo-1153-oxo-1154-oxo-1155-oxo-1156-oxo-1157-oxo-1158-oxo-1159-oxo-1160-oxo-1161-oxo-1162-oxo-1163-oxo-1164-oxo-1165-oxo-1166-oxo-1167-oxo-1168-oxo-1169-oxo-1170-oxo-1171-oxo-1172-oxo-1173-oxo-1174-oxo-1175-oxo-1176-oxo-1177-oxo-1178-oxo-1179-oxo-1180-oxo-1181-oxo-1182-oxo-1183-oxo-1184-oxo-1185-oxo-1186-oxo-1187-oxo-1188-oxo-1189-oxo-1190-oxo-1191-oxo-1192-oxo-1193-oxo-1194-oxo-1195-oxo-1196-oxo-1197-oxo-1198-oxo-1199-oxo-1200-oxo-1201-oxo-1202-oxo-1203-oxo-1204-oxo-1205-oxo-1206-oxo-1207-oxo-1208-oxo-1209-oxo-1210-oxo-1211-oxo-1212-oxo-1213-oxo-1214-oxo-1215-oxo-1216-oxo-1217-oxo-1218-oxo-1219-oxo-1220-oxo-1221-oxo-1222-oxo-1223-oxo-1224-oxo-1225-oxo-1226-oxo-1227-oxo-1228-oxo-1229-oxo-1230-oxo-1231-oxo-1232-oxo-1233-oxo-1234-oxo-1235-oxo-1236-oxo-1237-oxo-1238-oxo-1239-oxo-1240-oxo-1241-oxo-1242-oxo-1243-oxo-1244-oxo-1245-oxo-1246-oxo-1247-oxo-1248-oxo-1249-oxo-1250-oxo-1251-oxo-1252-oxo-1253-oxo-1254-oxo-1255-oxo-1256-oxo-1257-oxo-1258-oxo-1259-oxo-1260-oxo-1261-oxo-1262-oxo-1263-oxo-1264-oxo-1265-oxo-1266-oxo-1267-oxo-1268-oxo-1269-oxo-1270-oxo-1271-oxo-1272-oxo-1273-oxo-1274-oxo-1275-oxo-1276-oxo-1277-oxo-1278-oxo-1279-oxo-1280-oxo-1281-oxo-1282-oxo-1283-oxo-1284-oxo-1285-oxo-1286-oxo-1287-oxo-1288-oxo-1289-oxo-1290-oxo-1291-oxo-1292-oxo-1293-oxo-1294-oxo-1295-oxo-1296-oxo-1297-oxo-1298-oxo-1299-oxo-1300-ox |                            |                    |                 |                              |                                          |                                |                                            |                                       |                                |                    |

Table S1. Cont 8.

| UniProt/Swiss-Prot ID | Description                                                          | Protein score <sup>a</sup> | Protein mass (kDa) | pI <sup>a</sup> | Num. of matches <sup>a</sup> | Num. of significant matches <sup>a</sup> | Num. of sequences <sup>a</sup> | Num. of significant sequences <sup>a</sup> | Num. of unique sequences <sup>a</sup> | Sequence coverage <sup>b</sup> | emPA <sup>c</sup> |
|-----------------------|----------------------------------------------------------------------|----------------------------|--------------------|-----------------|------------------------------|------------------------------------------|--------------------------------|--------------------------------------------|---------------------------------------|--------------------------------|-------------------|
| PGRK2.HUMAN           | Membrane-associated progesterone receptor component 2                | 55                         | 55                 | 5.18            | 1                            | 1                                        | 1                              | 1                                          | 1                                     | 0.08                           | 0.16              |
| SPRHR.HUMAN           | Spermatocyte reduction                                               | 55                         | 28031              | 8.24            | 1                            | 1                                        | 1                              | 1                                          | 1                                     | 0.08                           | 0.16              |
| THYTX.HUMAN           | Transferrin                                                          | 55                         | 15877              | 5.52            | 2                            | 2                                        | 2                              | 2                                          | 2                                     | 0.15                           | 0.23              |
| HS105.HUMAN           | Heart shock protein 105 kDa                                          | 55                         | 96804              | 5.28            | 11                           | 1                                        | 8                              | 1                                          | 8                                     | 0.15                           | 0.52              |
| LASPT2.HUMAN          | LM and SH2 domain protein 1                                          | 55                         | 29868              | 6.61            | 10                           | 3                                        | 4                              | 3                                          | 4                                     | 0.21                           | 0.24              |
| RM12.HUMAN            | 35S ribosomal protein L12, mitochondrial                             | 55                         | 91335              | 9.04            | 1                            | 1                                        | 1                              | 1                                          | 1                                     | 0.31                           | 0.23              |
| STX7.HUMAN            | Syntaxin-7                                                           | 55                         | 28797              | 5.41            | 3                            | 2                                        | 2                              | 2                                          | 2                                     | 0.19                           | 0.15              |
| MTGDF.HUMAN           | Myelin-derived growth factor                                         | 55                         | 19193              | 6.2             | 4                            | 2                                        | 2                              | 2                                          | 2                                     | 0.12                           | 0.25              |
| JOSL2.HUMAN           | Joslyn-2                                                             | 55                         | 20743              | 6.9             | 1                            | 1                                        | 1                              | 1                                          | 1                                     | 0.11                           | 0.21              |
| TS101.HUMAN           | Tumor susceptibility gene 101 protein                                | 54                         | 43916              | 6.06            | 6                            | 1                                        | 4                              | 1                                          | 4                                     | 0.24                           | 0.61              |
| FA2H.HUMAN            | Oxidation of fatty acids 2                                           | 54                         | 54716              | 7.12            | 2                            | 1                                        | 1                              | 1                                          | 1                                     | 0.07                           | 0.09              |
| QO2R.HUMAN            | Quinone oxidoreductase                                               | 54                         | 35185              | 8.56            | 8                            | 4                                        | 6                              | 4                                          | 6                                     | 0.34                           | 0.6               |
| DCR1L.HUMAN           | Dicerin-1                                                            | 54                         | 28382              | 8.54            | 1                            | 1                                        | 1                              | 1                                          | 1                                     | 0.08                           | 0.15              |
| CO5B.HUMAN            | CO5B decarboxylase                                                   | 54                         | 14168              | 6.02            | 2                            | 1                                        | 1                              | 1                                          | 1                                     | 0.19                           | 0.23              |
| LAMP1.HUMAN           | Lysosomal-associated membrane decarboxylase 2                        | 54                         | 44932              | 5.35            | 1                            | 1                                        | 1                              | 1                                          | 1                                     | 0.04                           | 0.1               |
| RDH12.HUMAN           | Retinol dehydrogenase 14                                             | 54                         | 35841              | 6.02            | 3                            | 2                                        | 2                              | 2                                          | 2                                     | 0.11                           | 0.12              |
| HMPL.HUMAN            | Hemerythrin nuclear ribonucleoprotein L                              | 54                         | 44092              | 8.46            | 4                            | 3                                        | 2                              | 3                                          | 3                                     | 0.18                           | 0.14              |
| IFR1.HUMAN            | Interferon- $\gamma$ inducible protein 16                            | 54                         | 88199              | 9.31            | 5                            | 1                                        | 3                              | 1                                          | 3                                     | 0.08                           | 0.05              |
| MMP1.HUMAN            | Matrix metalloproteinase 1                                           | 54                         | 65852              | 7.63            | 6                            | 1                                        | 3                              | 1                                          | 3                                     | 0.08                           | 0.07              |
| PFM1.HUMAN            | Protein phosphatase 1F                                               | 54                         | 48900              | 4.99            | 3                            | 2                                        | 2                              | 2                                          | 2                                     | 0.13                           | 0.19              |
| TL2.HUMAN             | Translocin beta-like protein 2                                       | 53                         | 28876              | 8.52            | 1                            | 1                                        | 1                              | 1                                          | 1                                     | 0.03                           | 0.09              |
| OSIP1.HUMAN           | Osteocalcin-related beta-stalk protein 1                             | 53                         | 8411               | 15.82           | 2                            | 2                                        | 2                              | 2                                          | 2                                     | 0.24                           | 0.22              |
| DC2.HUMAN             | D-lysine decarboxylase $\beta$ -like protein                         | 53                         | 14186              | 5.89            | 7                            | 5                                        | 3                              | 2                                          | 3                                     | 0.52                           | 0.78              |
| APPL1.HUMAN           | Apoptosis                                                            | 53                         | 41713              | 8.24            | 6                            | 5                                        | 3                              | 2                                          | 3                                     | 0.1                            | 0.22              |
| NOL4.HUMAN            | NADH-dependent oxidoreductase chain 4                                | 53                         | 51547              | 9.4             | 1                            | 1                                        | 1                              | 1                                          | 1                                     | 0.03                           | 0.08              |
| DOX1.HUMAN            | Dolichol kinase                                                      | 53                         | 59229              | 8.87            | 5                            | 2                                        | 4                              | 1                                          | 4                                     | 0.12                           | 0.07              |
| SWP1.HUMAN            | Switch-associated protein 70                                         | 53                         | 68804              | 5.88            | 10                           | 4                                        | 15                             | 8                                          | 15                                    | 0.08                           | 0.14              |
| JUP1.HUMAN            | Junctional microtubule associated homolog 1                          | 52                         | 16005              | 5.47            | 1                            | 1                                        | 1                              | 1                                          | 1                                     | 0.12                           | 0.29              |
| SHK1.HUMAN            | SH2 domain-containing kinase-binding protein 1                       | 52                         | 70882              | 8.24            | 5                            | 2                                        | 4                              | 1                                          | 4                                     | 0.12                           | 0.08              |
| PGM3.HUMAN            | Basement membrane-specific heparan sulfate proteoglycan core protein | 51                         | 46532              | 6.06            | 1                            | 1                                        | 8                              | 1                                          | 8                                     | 0.04                           | 0.04              |
| MSMO1.HUMAN           | Methylmalonate decarboxylase 1                                       | 51                         | 14127              | 11.05           | 1                            | 1                                        | 1                              | 1                                          | 1                                     | 0.22                           | 0.34              |
| TRIA1.HUMAN           | Tripartite motif-containing protein 47                               | 51                         | 35183              | 6.75            | 15                           | 3                                        | 18                             | 3                                          | 18                                    | 0.15                           | 0.18              |
| SOAT1.HUMAN           | Protein transport protein SCA1A                                      | 51                         | 23373              | 5.4             | 10                           | 2                                        | 7                              | 1                                          | 7                                     | 0.08                           | 0.02              |
| SOAT1.HUMAN           | Stearoyl-CoA transferase 1                                           | 51                         | 64492              | 8.08            | 12                           | 4                                        | 18                             | 2                                          | 18                                    | 0.08                           | 0.02              |
| BDH2.HUMAN            | 3-hydroxybutyrate dehydrogenase type 2                               | 51                         | 26707              | 7.56            | 2                            | 2                                        | 1                              | 1                                          | 1                                     | 0.09                           | 0.17              |
| ADRO2.HUMAN           | NADH-dependent oxidoreductase, mitochondrial                         | 51                         | 53863              | 8.72            | 2                            | 2                                        | 2                              | 2                                          | 2                                     | 0.1                            | 0.06              |
| CSN1.HUMAN            | COPII signalosome complex subunit 1                                  | 51                         | 55501              | 6.3             | 3                            | 1                                        | 3                              | 1                                          | 3                                     | 0.15                           | 0.19              |
| APB3.HUMAN            | APB3 complex subunit beta-1                                          | 51                         | 21244              | 5.76            | 13                           | 5                                        | 9                              | 3                                          | 9                                     | 0.14                           | 0.11              |
| ULAI.HUMAN            | NEDD8-activating enzyme E1 regulatory subunit                        | 50                         | 62029              | 4.9             | 4                            | 2                                        | 4                              | 2                                          | 4                                     | 0.09                           | 0.09              |
| MG13.HUMAN            | MG13 complex subunit MG13                                            | 50                         | 13079              | 9.44            | 2                            | 2                                        | 2                              | 2                                          | 2                                     | 0.44                           | 0.88              |
| TOPBP1.HUMAN          | Activated R1A protein kinase 2 transcriptional coactivator p15       | 50                         | 14388              | 9.6             | 2                            | 1                                        | 2                              | 1                                          | 2                                     | 0.31                           | 0.23              |
| ACTN1.HUMAN           | Aspirin acetyltransferase, mitochondrial                             | 50                         | 47487              | 8.14            | 1                            | 1                                        | 3                              | 1                                          | 3                                     | 0.1                            | 0.3               |
| VASN.HUMAN            | Vasoin                                                               | 50                         | 71688              | 7.16            | 2                            | 2                                        | 1                              | 1                                          | 1                                     | 0.06                           | 0.06              |
| QPL1.HUMAN            | Quaternone peroxidase 1                                              | 50                         | 22075              | 6.15            | 10                           | 4                                        | 4                              | 4                                          | 4                                     | 0.45                           | 0.4               |
| RECQ1.HUMAN           | ATP-dependent DNA helicase Q1                                        | 50                         | 73410              | 8.12            | 3                            | 1                                        | 3                              | 1                                          | 3                                     | 0.1                            | 0.06              |
| HWE1.HUMAN            | ES ubiquitin-protein ligase HWE1                                     | 50                         | 48189              | 5.1             | 14                           | 3                                        | 8                              | 2                                          | 8                                     | 0.05                           | 0.05              |
| HYEP.HUMAN            | Exonin hyaluronate 1                                                 | 50                         | 52815              | 6.27            | 3                            | 1                                        | 3                              | 1                                          | 3                                     | 0.15                           | 0.19              |
| PTPA.HUMAN            | Serine/threonine-protein phosphatase 2A activator                    | 50                         | 40641              | 5.63            | 5                            | 2                                        | 2                              | 2                                          | 2                                     | 0.18                           | 0.23              |
| TBD1.HUMAN            | Tubulin-specific chaperone D1                                        | 50                         | 12315              | 5.8             | 2                            | 2                                        | 2                              | 2                                          | 2                                     | 0.17                           | 0.07              |
| ALG1.HUMAN            | Oncofetal glycoprotein beta-bisectin-mannosyltransferase             | 49                         | 52484              | 6.81            | 2                            | 2                                        | 2                              | 2                                          | 2                                     | 0.11                           | 0.17              |
| NPT2.HUMAN            | Endoplasmic reticulum protein 2                                      | 49                         | 16559              | 7.56            | 3                            | 1                                        | 3                              | 1                                          | 3                                     | 0.37                           | 0.48              |
| PMH1.HUMAN            | Purine nucleoside phosphorylase                                      | 49                         | 32097              | 6.95            | 8                            | 3                                        | 4                              | 3                                          | 4                                     | 0.31                           | 0.07              |
| LSMT.HUMAN            | USP on RNA-associated Ser-His protein LSm7                           | 49                         | 11595              | 5.1             | 6                            | 3                                        | 3                              | 3                                          | 3                                     | 0.52                           | 0.29              |
| EMT1.HUMAN            | Extracellular matrix protein 1                                       | 49                         | 60835              | 8.25            | 3                            | 1                                        | 3                              | 1                                          | 3                                     | 0.07                           | 0.07              |
| LMNB1.HUMAN           | Lamin A                                                              | 49                         | 46379              | 6.07            | 1                            | 1                                        | 2                              | 1                                          | 2                                     | 0.07                           | 0.09              |
| TC13.HUMAN            | Tail-binding protein 3                                               | 49                         | 13726              | 8.04            | 3                            | 1                                        | 3                              | 1                                          | 2                                     | 0.28                           | 0.35              |
| PGM5L.HUMAN           | 24S proteasome non-ATPase regulatory subunit B                       | 49                         | 35887              | 5.73            | 1                            | 1                                        | 1                              | 1                                          | 1                                     | 0.04                           | 0.1               |
| CBX3.HUMAN            | Chromatin-associated protein homolog 3                               | 49                         | 20798              | 5.23            | 4                            | 2                                        | 2                              | 2                                          | 2                                     | 0.25                           | 0.49              |
| BCAT2.HUMAN           | Branched-chain amino-acid aminotransferase, mitochondrial            | 49                         | 24926              | 8.88            | 4                            | 3                                        | 2                              | 1                                          | 2                                     | 0.15                           | 0.41              |
| PAB1.HUMAN            | Protein-binding domain 1                                             | 49                         | 11843              | 7.88            | 8                            | 6                                        | 7                              | 6                                          | 7                                     | 0.97                           | 0.97              |
| 4F2.HUMAN             | 4F2 cell-surface antigen heavy chain                                 | 49                         | 47952              | 4.89            | 5                            | 2                                        | 3                              | 2                                          | 3                                     | 0.09                           | 0.13              |
| SRD5.HUMAN            | Ribosome maturation protein SRD5                                     | 49                         | 28746              | 8.61            | 2                            | 1                                        | 2                              | 1                                          | 2                                     | 0.22                           | 0.18              |
| YF1B.HUMAN            | Protein YF1B                                                         | 48                         | 34143              | 9.21            | 3                            | 3                                        | 1                              | 1                                          | 1                                     | 0.08                           | 0.13              |
| GREL2.HUMAN           | Ureapylase with GCG-like domain protein 2                            | 48                         | 38166              | 4.5             | 2                            | 2                                        | 1                              | 1                                          | 1                                     | 0.04                           | 0.11              |
| NCA.HUMAN             | Nucleoside                                                           | 48                         | 76362              | 5.67            | 2                            | 1                                        | 4                              | 1                                          | 4                                     | 0.04                           | 0.07              |
| KOY1.HUMAN            | UMP-CMP kinase                                                       | 48                         | 22208              | 5.44            | 3                            | 2                                        | 2                              | 1                                          | 2                                     | 0.17                           | 0.21              |
| MAT1A.HUMAN           | Methionine-associated protein 1A                                     | 47                         | 30528              | 4.85            | 14                           | 3                                        | 9                              | 3                                          | 9                                     | 0.06                           | 0.04              |
| EMC1.HUMAN            | ER membrane protein complex subunit 1                                | 47                         | 11489              | 7.28            | 1                            | 1                                        | 1                              | 1                                          | 1                                     | 0.13                           | 0.1               |
| PTCH1.HUMAN           | Protocadherin cell-surface protein                                   | 47                         | 129551             | 6.37            | 3                            | 1                                        | 2                              | 1                                          | 2                                     | 0.02                           | 0.03              |
| HMS1.HUMAN            | Minor histone-complex associated protein 3                           | 47                         | 11462              | 6.01            | 2                            | 2                                        | 2                              | 2                                          | 2                                     | 0.23                           | 0.2               |
| SSR1.HUMAN            | Transferase-associated protein subunit delta                         | 47                         | 18897              | 5.76            | 9                            | 2                                        | 2                              | 2                                          | 2                                     | 0.18                           | 0.54              |
| CHMP1.HUMAN           | Charged multivesicular body protein 3                                | 47                         | 23907              | 5.1             | 1                            | 1                                        | 1                              | 1                                          | 1                                     | 0.14                           | 0.18              |
| DRH1.HUMAN            | Dehydrogenase reductase SDR family member 7                          | 47                         | 38274              | 8.59            | 1                            | 1                                        | 1                              | 1                                          | 1                                     | 0.27                           | 0.4               |
| RT8.HUMAN             | 28S ribosomal protein S6, mitochondrial                              | 47                         | 14218              | 9.3             | 3                            | 2                                        | 1                              | 1                                          | 1                                     | 0.19                           | 0.23              |
| AT10L.HUMAN           | Atto-180 protein family 1 member C1                                  | 47                         | 36765              | 6.32            | 6                            | 3                                        | 3                              | 3                                          | 3                                     | 0.23                           | 0.4               |
| ITPA.VJ.HUMAN         | Interferon alpha-1                                                   | 47                         | 115884             | 5.45            | 6                            | 2                                        | 6                              | 2                                          | 6                                     | 0.11                           | 0.07              |
| DPF2.HUMAN            | Dipeptidyl peptidase 2                                               | 47                         | 54307              | 5.81            | 4                            | 1                                        | 2                              | 1                                          | 2                                     | 0.19                           | 0.08              |
| APMA1.HUMAN           | Adipocyte plasma membrane-associated protein                         | 47                         | 66451              | 5.82            | 2                            | 2                                        | 2                              | 2                                          | 2                                     | 0.18                           | 0.2               |
| VAC1.HUMAN            | Protein VAC1 homolog                                                 | 47                         | 87917              | 5.76            | 6                            | 1                                        | 4                              | 1                                          | 4                                     | 0.12                           | 0.05              |
| ACQ1.HUMAN            | Cytochrome associated cytochrome                                     | 46                         | 88337              | 8.23            | 7                            | 2                                        | 3                              | 1                                          | 3                                     | 0.07                           | 0.04              |
| AT10L.HUMAN           | ATP10-like protein 10                                                | 46                         | 91293              | 6.1             | 5                            | 2                                        | 3                              | 1                                          | 3                                     | 0.13                           | 0.1               |
| PTCH1.HUMAN           | Protocadherin cell-surface protein                                   | 46                         | 29377              | 6.8             | 3                            | 2                                        | 1                              | 1                                          | 1                                     | 0.14                           | 0.03              |
| KSR1.HUMAN            | NR4A1 inhibitor beta                                                 | 46                         | 37748              | 6.7             | 1                            | 1                                        | 1                              | 1                                          | 1                                     | 0.12                           | 0.06              |
| RM2.HUMAN             | 35S ribosomal protein L28, mitochondrial                             | 46                         | 30108              | 8.34            | 2                            | 2                                        | 2                              | 2                                          | 2                                     | 0.11                           | 0.32              |
| DNCL1.HUMAN           | DNA-Like protein 1                                                   | 46                         | 30035              | 5.18            | 1                            | 1                                        | 1                              | 1                                          | 1                                     | 0.16                           | 0.15              |
| OPT1A.HUMAN           | Carbamate Oxidoreductase/transferase 1, liver isoform                | 46                         | 88211              | 8.85            | 6                            | 3                                        | 12                             | 3                                          | 12                                    | 0.09                           | 0.09              |
| THOP1.HUMAN           | Thimet oligopeptidase                                                | 46                         | 78789              | 5.72            | 8                            | 2                                        | 7                              | 2                                          | 7                                     | 0.18                           | 0.11              |
| BACH1.HUMAN           | Cysteine acid coenzyme A thioester hydrolase                         | 46                         | 47169              | 8.85            | 6                            | 2                                        | 7                              | 2                                          | 7                                     | 0.13                           | 0.1               |
| NRHP1.HUMAN           | Nuclear receptor-binding protein                                     | 46                         | 96807              | 5.02            | 3                            | 2                                        | 2                              | 2                                          | 2                                     | 0.09                           | 0.15              |
| PRPO.HUMAN            | Pyridoxal-5-phosphate oxidase                                        | 45                         | 29969              | 6.62            | 2                            | 1                                        | 1                              | 1                                          | 1                                     | 0.07                           | 0.15              |
| NUD5.HUMAN            | Nuclear pore complex protein Nup205                                  | 45                         | 22716              | 6.81            | 5                            | 5                                        | 5                              | 5                                          | 5                                     | 0.05                           | 0.05              |
| IFR1.HUMAN            | Interferon growth factor receptor subunit 15-like 1                  | 45                         | 84197              | 4.93            | 3                            | 3                                        | 3                              | 3                                          | 3                                     | 0.08                           | 0.05              |
| SPB1.HUMAN            | Skin fibroblast protein 38 subunit 1                                 | 45                         | 145738             | 6.65            | 6                            | 3                                        | 3                              | 3                                          | 3                                     | 0.05                           | 0.03              |
| EPD3.HUMAN            | Enzyme P granules protein 5 homolog                                  | 45                         | 29293              | 5.99            | 6                            | 5                                        | 5                              | 5                                          | 5                                     | 0.04                           | 0.03              |
| PXN.HUMAN             | Peroxidase homolog                                                   | 45                         | 15710              | 6.79            | 5                            | 3                                        | 4                              | 3                                          | 4                                     | 0.06                           | 0.08              |
| MYO1B.HUMAN           | ES ubiquitin-protein ligase MYO1B                                    | 44                         | 50919              | 6.63            | 2                            | 2                                        | 1                              | 1                                          | 1                                     | 0.06                           | 0.01              |
| CSN1.HUMAN            | COPII signalosome complex subunit 7a                                 | 44                         | 40258              | 8.33            | 2                            | 2                                        | 1                              | 1                                          | 1                                     | 0.11                           | 0.19              |
| DNCL1.HUMAN           | Dicerin subunit 2                                                    | 44                         | 32024              | 5.1             | 3                            | 1                                        | 3                              | 1                                          | 3                                     | 0.17                           | 0.1               |
| RM2.HUMAN             | Residual of microtubule dynamics protein 3                           | 44                         | 52086              | 5.02            | 2                            | 2                                        | 2                              | 2                                          | 2                                     | 0.12                           | 0.1               |

\*Protein score is calculated from the score of the peptide attributed to the protein

<sup>b</sup>pI is (Predicted) isoelectric point.

<sup>c</sup>Number of matches is spectrum number matched to protein.<sup>47</sup>

<sup>a</sup>Number of matches is spectrum number matched to protein<sup>41</sup>.

<sup>d</sup>Number of significant matches is spectrum number that matches p

<sup>a</sup>Number of sequences is number of peptides matched to protein<sup>#2</sup>.

<sup>†</sup>Number of significant sequences is number of peptides exceeding the identification

<sup>3</sup>Number of unique sequences is a unique<sup>63</sup> number of peptides matched to proteins.

<sup>b</sup>Sequence coverage is the ratio of the total number of matched peptide residues to the total length of the protein.

<sup>1</sup>Exponentially Modified Protein Abundance Index ([http://www.mstrixscience.com/help/quant\\_empi\\_help.html](http://www.mstrixscience.com/help/quant_empi_help.html))

Table S1. Cont 9

Protein score is calculated from the score of the peptide attributed to the protein.

$|\text{pI}|$  is (Predicted) isoelectric point.

Number of matches is spectrum number matched to protein<sup>16</sup>.

Number of significant matches is spectrum number that matches protein and exceeds the identification criteria.

Number of sequences is number of peptides matched to protein<sup>16</sup>.

Number of significant sequences is number of peptides exceeding the identification criteria matched to proteins.

Number of unique sequences is a unique<sup>16</sup> number of peptides matched to proteins.

Sequence coverage is the ratio of the total number of matched peptide residues to the total length of the protein.

50% sequence coverage means that at least 50% of the amino acid residues in the protein are covered by at least one peptide.



Table S1, Cont 16.

| UniProt/Swiss-Prot ID | Description                                                                  | Protein score <sup>a</sup> | Protein mass (kDa) | pI <sup>b</sup> | Num. of matches <sup>c</sup> | Num. of significant matches <sup>d</sup> | Num. of sequences <sup>e</sup> | Num. of significant sequences <sup>f</sup> | Num. of unique sequences <sup>g</sup> | Sequence coverage <sup>h</sup> | emPAI |
|-----------------------|------------------------------------------------------------------------------|----------------------------|--------------------|-----------------|------------------------------|------------------------------------------|--------------------------------|--------------------------------------------|---------------------------------------|--------------------------------|-------|
| XPC_HUMAN             | Exportin-5                                                                   | 35                         | 136222             | 5.56            | 8                            | 2                                        | 3                              | 1                                          | 3                                     | 0.85                           | 0.08  |
| QDR_HUMAN             | Quarantine reductase, mitochondrial                                          | 35                         | 96221              | 8.14            | 7                            | 2                                        | 4                              | 2                                          | 4                                     | 0.16                           | 0.16  |
| HMOX1_HUMAN           | Heme oxygenase 1                                                             | 35                         | 32788              | 7.88            | 5                            | 1                                        | 3                              | 1                                          | 3                                     | 0.19                           | 0.14  |
| ASPS_HUMAN            | Asparagine synthetase [glutamine-hydrolyzing]                                | 35                         | 64229              | 6.39            | 4                            | 1                                        | 4                              | 1                                          | 4                                     | 0.19                           | 0.07  |
| SPART_HUMAN           | Spartin                                                                      | 35                         | 72788              | 5.66            | 3                            | 2                                        | 2                              | 2                                          | 2                                     | 0.11                           | 0.12  |
| PONZ_HUMAN            | Serum peroxanase/ arylsterase 2                                              | 35                         | 39372              | 5.33            | 3                            | 1                                        | 2                              | 1                                          | 2                                     | 0.19                           | 0.11  |
| QLRF_HUMAN            | Glucosylated lysosomal membrane protein                                      | 35                         | 43636              | 6.1             | 2                            | 1                                        | 1                              | 1                                          | 1                                     | 0.05                           | 0.1   |
| TDJ_HUMAN             | Transport and Golgi organization protein 1 homolog                           | 35                         | 213570             | 4.76            | 5                            | 2                                        | 3                              | 1                                          | 3                                     | 0.04                           | 0.02  |
| EPF2_HUMAN            | Eukaryotic translation initiation factor 2A                                  | 34                         | 84949              | 5.8             | 2                            | 2                                        | 1                              | 1                                          | 1                                     | 0.04                           | 0.07  |
| TMED3_HUMAN           | Transmembrane emp24 domain-containing protein 3                              | 34                         | 24761              | 5.4             | 1                            | 1                                        | 1                              | 1                                          | 1                                     | 0.13                           | 0.18  |
| EXOC2_HUMAN           | Exocyst complex component 2                                                  | 34                         | 104000             | 6.46            | 10                           | 1                                        | 6                              | 1                                          | 6                                     | 0.16                           | 0.04  |
| QLN_HUMAN             | QlnA                                                                         | 34                         | 68165              | 5.24            | 1                            | 1                                        | 1                              | 1                                          | 1                                     | 0.05                           | 0.06  |
| IFIT5_HUMAN           | Interferon-induced protein with tetratricopeptide repeats 5                  | 34                         | 55812              | 7               | 4                            | 1                                        | 4                              | 1                                          | 4                                     | 0.21                           | 0.08  |
| RGS3_HUMAN            | Synermyrin-A                                                                 | 34                         | 59671              | 5.2             | 16                           | 1                                        | 4                              | 1                                          | 4                                     | 0.13                           | 0.07  |
| ERD1_HUMAN            | Lecanoderm synthase                                                          | 34                         | 83255              | 6.16            | 2                            | 1                                        | 1                              | 1                                          | 1                                     | 0.02                           | 0.05  |
| DCPS_HUMAN            | m7GpppX dephosphatase                                                        | 34                         | 38585              | 5.93            | 2                            | 2                                        | 2                              | 2                                          | 2                                     | 0.1                            | 0.04  |
| CTTM_HUMAN            | Microtubule-associated GTP-actin-binding synthase, mitochondrial             | 34                         | 105724             | 8.22            | 1                            | 1                                        | 1                              | 1                                          | 1                                     | 0.02                           | 0.02  |
| USP31_HUMAN           | Probable ubiquitin carboxyl-terminal hydrolase FAF-3                         | 34                         | 292584             | 5.22            | 18                           | 1                                        | 11                             | 1                                          | 11                                    | 0.08                           | 0.01  |
| TRXR1_HUMAN           | Thioredoxin reductase 1, cytosolic                                           | 33                         | 70862              | 7.16            | 5                            | 2                                        | 4                              | 2                                          | 4                                     | 0.12                           | 0.13  |
| DPPI_HUMAN            | Dibasic-hydrophobic mannosyltransferase subunit 1                            | 33                         | 29616              | 9.57            | 7                            | 1                                        | 4                              | 1                                          | 4                                     | 0.24                           | 0.15  |
| NSF1C_HUMAN           | NSF1 cofactor p47                                                            | 33                         | 40548              | 4.89            | 3                            | 1                                        | 2                              | 1                                          | 2                                     | 0.11                           | 0.11  |
| RML2_HUMAN            | 35S ribosomal protein L54, mitochondrial                                     | 33                         | 15809              | 9.6             | 1                            | 1                                        | 1                              | 1                                          | 1                                     | 0.19                           | 0.3   |
| TRNL1_HUMAN           | Thioredoxin-like protein 1                                                   | 33                         | 32231              | 4.84            | 4                            | 2                                        | 3                              | 2                                          | 3                                     | 0.21                           | 0.28  |
| SF3B4_HUMAN           | Splicing factor 3B subunit 4                                                 | 33                         | 44357              | 8.54            | 2                            | 1                                        | 2                              | 1                                          | 2                                     | 0.11                           | 0.1   |
| GSBP_HUMAN            | GSBP-interacting protein                                                     | 33                         | 15638              | 4.36            | 3                            | 1                                        | 2                              | 1                                          | 2                                     | 0.19                           | 0.3   |
| CONL2_HUMAN           | Microtubule                                                                  | 33                         | 27385              | 9.1             | 2                            | 1                                        | 1                              | 1                                          | 1                                     | 0.09                           | 0.12  |
| ODR8_HUMAN            | 2-oxoisovalerate dehydrogenase subunit beta, mitochondrial                   | 33                         | 43095              | 5.89            | 3                            | 1                                        | 3                              | 1                                          | 3                                     | 0.17                           | 0.1   |
| COMD2_HUMAN           | COMD domain-containing protein 2                                             | 32                         | 22721              | 6.24            | 5                            | 2                                        | 3                              | 1                                          | 3                                     | 0.24                           | 0.2   |
| UACA_HUMAN            | Uveal autoantigen with collagen-coil domains and ankyrin repeats             | 32                         | 162404             | 6.6             | 22                           | 1                                        | 6                              | 1                                          | 6                                     | 0.07                           | 0.03  |
| ROD2_HUMAN            | E3 ubiquitin-protein ligase TRIM21                                           | 32                         | 54135              | 5.88            | 5                            | 1                                        | 5                              | 1                                          | 5                                     | 0.17                           | 0.08  |
| COX4_HUMAN            | Cytochrome oxidase 4                                                         | 32                         | 31708              | 6.51            | 6                            | 2                                        | 3                              | 2                                          | 3                                     | 0.28                           | 0.13  |
| VP37A_HUMAN           | Vacuolar protein sorting-associated protein 37A                              | 32                         | 44287              | 5.37            | 1                            | 1                                        | 1                              | 1                                          | 1                                     | 0.1                            | 0.1   |
| ITGA2_HUMAN           | Integrin alpha-2                                                             | 32                         | 128214             | 5.16            | 5                            | 1                                        | 5                              | 1                                          | 5                                     | 0.11                           | 0.03  |
| ACAT4_HUMAN           | Acyloxyacyl-CoA transporter 1                                                | 32                         | 60876              | 6.89            | 4                            | 2                                        | 2                              | 1                                          | 2                                     | 0.11                           | 0.07  |
| S3BA3_HUMAN           | Zinc transporter ZIP9                                                        | 32                         | 32231              | 6.21            | 1                            | 1                                        | 1                              | 1                                          | 1                                     | 0.07                           | 0.14  |
| EXOC1_HUMAN           | Exocyst complex component 1                                                  | 32                         | 83230              | 6.33            | 5                            | 3                                        | 4                              | 2                                          | 4                                     | 0.12                           | 0.11  |
| SSX2A1_HUMAN          | Sukkle carrier family 52, riboflavin transporter, member 1                   | 32                         | 46287              | 5.9             | 2                            | 2                                        | 1                              | 1                                          | 1                                     | 0.05                           | 0.09  |
| RT1E_HUMAN            | 28S ribosomal protein S16, mitochondrial                                     | 32                         | 15335              | 9.58            | 1                            | 1                                        | 1                              | 1                                          | 1                                     | 0.15                           | 0.31  |
| BGL1_HUMAN            | Beta-mannosidase                                                             | 32                         | 76027              | 6.1             | 7                            | 2                                        | 1                              | 1                                          | 1                                     | 0.09                           | 0.06  |
| MDM1_HUMAN            | Mitochondrial 2-oxoglutarate/malate carrier protein                          | 32                         | 34040              | 9.82            | 4                            | 1                                        | 3                              | 1                                          | 3                                     | 0.22                           | 0.13  |
| FBLN1_HUMAN           | Fibulin-1                                                                    | 32                         | 77162              | 5.07            | 6                            | 4                                        | 4                              | 2                                          | 4                                     | 0.12                           | 0.18  |
| KOM5_HUMAN            | Lysine-specific demethylase 6B                                               | 32                         | 176523             | 8.83            | 12                           | 1                                        | 5                              | 1                                          | 5                                     | 0.07                           | 0.02  |
| PSME4_HUMAN           | Proteasome activator complex subunit 4                                       | 31                         | 21199              | 6.45            | 4                            | 1                                        | 3                              | 1                                          | 3                                     | 0.03                           | 0.02  |
| ACAL_HUMAN            | Alpha-galactosidase A                                                        | 31                         | 48725              | 5.35            | 3                            | 2                                        | 1                              | 1                                          | 1                                     | 0.06                           | 0.08  |
| EBP1_HUMAN            | Enoamph-binding protein-like                                                 | 31                         | 23188              | 5.81            | 2                            | 2                                        | 1                              | 1                                          | 1                                     | 0.15                           | 0.19  |
| CD9_HUMAN             | CD9 antigen                                                                  | 31                         | 25398              | 6.8             | 3                            | 2                                        | 2                              | 1                                          | 2                                     | 0.27                           | 0.18  |
| POTD1_HUMAN           | Prenylcysteine oxidase 1                                                     | 31                         | 56604              | 5.8             | 3                            | 2                                        | 2                              | 1                                          | 2                                     | 0.05                           | 0.08  |
| XPO4_HUMAN            | Exportin-4                                                                   | 31                         | 130058             | 4.85            | 9                            | 2                                        | 7                              | 2                                          | 7                                     | 0.13                           | 0.07  |
| SF3A2_HUMAN           | Splicing factor 3A subunit 3                                                 | 31                         | 58512              | 6.27            | 2                            | 1                                        | 2                              | 1                                          | 2                                     | 0.1                            | 0.07  |
| CAB45_HUMAN           | 45 kDa calyx-binding protein                                                 | 31                         | 41780              | 4.76            | 5                            | 2                                        | 2                              | 1                                          | 2                                     | 0.14                           | 0.1   |
| CD72_HUMAN            | CD72 antigen                                                                 | 31                         | 57199              | 4.77            | 2                            | 2                                        | 2                              | 2                                          | 2                                     | 0.08                           | 0.16  |
| TXR4_HUMAN            | Taxilin-expressed protein 284                                                | 31                         | 24167              | 4.76            | 1                            | 1                                        | 1                              | 1                                          | 1                                     | 0.06                           | 0.13  |
| COAT1_HUMAN           | CoA division cycle and apoptosis regulator protein 1                         | 31                         | 132738             | 5.57            | 7                            | 1                                        | 4                              | 1                                          | 4                                     | 0.06                           | 0.03  |
| KDEL1_HUMAN           | KDEL motif-containing protein 1                                              | 31                         | 58005              | 7.59            | 1                            | 1                                        | 1                              | 1                                          | 1                                     | 0.03                           | 0.07  |
| EDL4_HUMAN            | Endoplasmic reticulum chaperone                                              | 31                         | 70552              | 6.14            | 8                            | 2                                        | 6                              | 1                                          | 6                                     | 0.13                           | 0.06  |
| FUCO2_HUMAN           | Tissue alpha-L-fucosidase                                                    | 31                         | 53655              | 6.27            | 1                            | 1                                        | 1                              | 1                                          | 1                                     | 0.08                           | 0.08  |
| AFAM1_HUMAN           | Adrenomedullin                                                               | 31                         | 69024              | 5.84            | 5                            | 2                                        | 3                              | 2                                          | 3                                     | 0.12                           | 0.06  |
| PPPT1_HUMAN           | Serine/threonine-protein phosphatase 6 regulatory subunit 1                  | 31                         | 96664              | 4.45            | 4                            | 2                                        | 2                              | 1                                          | 2                                     | 0.05                           | 0.04  |
| GT027_HUMAN           | UPF0807 protein G20orf7                                                      | 30                         | 19279              | 6.34            | 2                            | 1                                        | 2                              | 1                                          | 2                                     | 0.16                           | 0.24  |
| RGD1_HUMAN            | Immunoglobulin GTPase family G protein                                       | 30                         | 62478              | 4.81            | 3                            | 2                                        | 1                              | 1                                          | 1                                     | 0.05                           | 0.07  |
| YIF1A_HUMAN           | Protein YIF1A                                                                | 30                         | 31891              | 8.88            | 3                            | 2                                        | 3                              | 2                                          | 3                                     | 0.19                           | 0.3   |
| CARM1_HUMAN           | Histone H3-lysine methyltransferase CARM1                                    | 30                         | 63511              | 6.25            | 6                            | 3                                        | 4                              | 2                                          | 4                                     | 0.17                           | 0.21  |
| KIF1_HUMAN            | Kinesin-13-like motor domain containing coiled-coil stalk                    | 30                         | 45266              | 8.3             | 2                            | 1                                        | 2                              | 1                                          | 2                                     | 0.14                           | 0.1   |
| NAV1_HUMAN            | Neuron navigator 1                                                           | 30                         | 202347             | 8.2             | 9                            | 2                                        | 6                              | 1                                          | 6                                     | 0.07                           | 0.04  |
| CASP8_HUMAN           | Caspase-8                                                                    | 30                         | 46351              | 5.73            | 1                            | 1                                        | 1                              | 1                                          | 1                                     | 0.06                           | 0.09  |
| GORS2_HUMAN           | Golgi reassembly-stacking protein 2                                          | 30                         | 47116              | 4.73            | 2                            | 1                                        | 2                              | 1                                          | 2                                     | 0.08                           | 0.09  |
| NPS1_HUMAN            | Protein Nip5 homolog 2                                                       | 30                         | 33721              | 9.42            | 3                            | 1                                        | 2                              | 1                                          | 2                                     | 0.15                           | 0.13  |
| SARK1_HUMAN           | Sarcolysosomal lysosomal hydrolase-like protein 1                            | 30                         | 58913              | 6.48            | 6                            | 1                                        | 6                              | 1                                          | 6                                     | 0.25                           | 0.07  |
| GSN3_HUMAN            | COP9 signalosome complex subunit 3                                           | 30                         | 47842              | 6.19            | 9                            | 1                                        | 8                              | 1                                          | 8                                     | 0.44                           | 0.09  |
| GSN2_HUMAN            | Glutamate-cysteine ligase regulatory subunit                                 | 30                         | 30708              | 5.89            | 1                            | 1                                        | 1                              | 1                                          | 1                                     | 0.11                           | 0.14  |
| MAP1F_HUMAN           | Microtubule-associated protein 1F                                            | 29                         | 112162             | 6.92            | 3                            | 1                                        | 3                              | 1                                          | 3                                     | 0.05                           | 0.04  |
| PGP1_HUMAN            | Prostaglandin G/H synthase 1                                                 | 29                         | 68642              | 6.81            | 2                            | 2                                        | 2                              | 2                                          | 2                                     | 0.09                           | 0.13  |
| MOT4_HUMAN            | Microtubule motor transporter 4                                              | 29                         | 49437              | 8.23            | 4                            | 2                                        | 2                              | 1                                          | 2                                     | 0.03                           | 0.09  |
| NAGK_HUMAN            | N-acetyl-D-glucosamine kinase                                                | 29                         | 37352              | 5.81            | 9                            | 1                                        | 3                              | 1                                          | 3                                     | 0.15                           | 0.12  |
| NUCB2_HUMAN           | Nucleobindin-2                                                               | 29                         | 50164              | 5.03            | 3                            | 2                                        | 2                              | 1                                          | 2                                     | 0.08                           | 0.09  |
| RGR1_HUMAN            | Receptor-interacting serine/threonine-protein kinase 2                       | 29                         | 61156              | 6.83            | 2                            | 1                                        | 2                              | 1                                          | 2                                     | 0.09                           | 0.07  |
| LMO7_HUMAN            | LM domain only protein 7                                                     | 29                         | 192578             | 8.24            | 10                           | 1                                        | 5                              | 1                                          | 5                                     | 0.05                           | 0.02  |
| AKAD1_HUMAN           | AKR1A1-related oxidoreductase                                                | 29                         | 24730              | 6.85            | 2                            | 1                                        | 1                              | 1                                          | 1                                     | 0.17                           | 0.18  |
| POXOD1_HUMAN          | Purkinje cell-specific oxidoreductase domain-containing protein 2            | 29                         | 51772              | 5.65            | 5                            | 2                                        | 5                              | 2                                          | 5                                     | 0.26                           | 0.15  |
| DHS2A_HUMAN           | Deoxyribonuclease-2-delta                                                    | 29                         | 39558              | 8.3             | 4                            | 2                                        | 2                              | 1                                          | 2                                     | 0.15                           | 0.23  |
| LEO3_HUMAN            | Galactose-3-epimerase                                                        | 29                         | 26106              | 6.57            | 5                            | 1                                        | 4                              | 1                                          | 4                                     | 0.22                           | 0.17  |
| PPH1_HUMAN            | Peptidyl-prolyl cis-trans isomerase F, mitochondrial                         | 28                         | 22028              | 9.48            | 2                            | 2                                        | 2                              | 2                                          | 2                                     | 0.27                           | 0.46  |
| DH102_HUMAN           | Dynamin heavy chain 10, axonemal                                             | 28                         | 514512             | 5.84            | 13                           | 1                                        | 10                             | 1                                          | 10                                    | 0.06                           | 0.01  |
| LEP1_HUMAN            | Lipin-1                                                                      | 28                         | 113952             | 5.4             | 8                            | 1                                        | 7                              | 1                                          | 7                                     | 0.13                           | 0.04  |
| MALD1_HUMAN           | MARVEL domain-containing protein 1                                           | 28                         | 18902              | 9.89            | 2                            | 1                                        | 1                              | 1                                          | 1                                     | 0.17                           | 0.24  |
| EDL3_HUMAN            | EDL-like repeat and discoidin-like domain-containing protein 3               | 28                         | 53708              | 7.88            | 2                            | 1                                        | 2                              | 1                                          | 2                                     | 0.11                           | 0.08  |
| ADBP1_HUMAN           | Adenosine diphosphate synthase complex-interacting multifunctional protein 1 | 28                         | 34331              | 6.81            | 3                            | 2                                        | 3                              | 2                                          | 3                                     | 0.17                           | 0.27  |
| SNX5_HUMAN            | Sorting nexin-5                                                              | 28                         | 46787              | 6.21            | 1                            | 1                                        | 1                              | 1                                          | 1                                     | 0.05                           | 0.09  |
| MA1A2_HUMAN           | Mannosyl-6-phosphate isomerase 1, 2-alpha-mannosidase IB                     | 28                         | 72857              | 7.17            | 2                            | 1                                        | 1                              | 1                                          | 1                                     | 0.03                           | 0.06  |
| FKBP4_HUMAN           | Peptidyl-prolyl cis-trans isomerase FKBP4                                    | 28                         | 51772              | 5.35            | 7                            | 1                                        | 5                              | 1                                          | 5                                     | 0.15                           | 0.08  |
| PSMD4_HUMAN           | Proteasome assembly chaperone 4                                              | 28                         | 13768              | 6.94            | 1                            | 1                                        | 1                              | 1                                          | 1                                     | 0.13                           | 0.35  |
| USOL1_HUMAN           | Ubiquitin-1                                                                  | 28                         | 62478              | 5.02            | 4                            | 1                                        | 3                              | 1                                          | 3                                     | 0.16                           | 0.07  |
| XPO7_HUMAN            | Exportin-7                                                                   | 28                         | 198883             | 5.24            | 2                            | 1                                        | 2                              | 1                                          | 2                                     | 0.05                           | 0.04  |
| HGB1_HUMAN            | Oxygen-dependent coproporphyrinogen-III oxidase, mitochondrial               | 28                         | 50120              | 6.59            | 4                            | 1                                        | 3                              | 1                                          | 3                                     | 0.2                            | 0.09  |
| NET2_HUMAN            | Osmoglycin NET2                                                              | 28                         | 30588              | 6.82            | 6                            | 1                                        | 3                              | 1                                          | 3                                     | 0.23                           | 0.14  |
| EMP1_HUMAN            | Endoplasmic membrane protein 3                                               | 27                         | 18417              | 8.16            | 1                            | 1                                        | 1                              | 1                                          | 1                                     | 0.21                           | 0.25  |
| WASO1_HUMAN           | WASH complex subunit S                                                       | 27                         | 134031             | 6.54            | 5                            | 2                                        | 4                              | 1                                          | 4                                     | 0.05                           | 0.06  |
| NU155_HUMAN           | Nuclear pore complex protein Nup155                                          | 27                         | 155100             | 5.78            | 8                            | 1                                        | 4                              | 1                                          | 4                                     | 0.09                           | 0.03  |
| USP2L_HUMAN           | Ubiquitin-associated protein 2-Bie                                           | 27                         | 114485             | 6.81            | 3                            | 1                                        | 3                              | 1                                          | 3                                     | 0.05                           | 0.04  |
| WAC1A_HUMAN           | WASH complex subunit 2A                                                      | 27                         | 147085             | 4.89            | 3                            | 1                                        | 3                              | 1                                          | 3                                     | 0.04                           | 0.03  |

<sup>a</sup>Protein score is calculated from the score of the peptide attributed to the protein.

<sup>b</sup>pI is (Predicted) isoelectric point.

<sup>c</sup>Number of matches is spectrum number matched to protein<sup>11</sup>.

<sup>d</sup>Number of significant matches is spectrum number that matches protein and exceeds the identification criteria.

<sup>e</sup>Number of sequences is number of peptides matched to protein<sup>11</sup>.

<sup>f</sup>Number of significant sequences is number of peptides exceeding the identification criteria matched to proteins.

<sup>g</sup>Number of unique sequences is a unique<sup>11</sup> number of peptides matched to proteins.

<sup>h</sup>Sequence coverage is the ratio of the total number of matched peptide residues to the total length of the protein.

<sup>i</sup>Exponentially Modified Protein Abundance Index ([http://www.matrixscience.com/help/quant\\_Lemaps\\_help.html](http://www.matrixscience.com/help/quant_Lemaps_help.html)).

Table S1, Cont 11.

| UniProt/Swiss-Prot ID | Description                                                         | Protein score <sup>1</sup> | Protein mass (kDa) | pI <sup>2</sup> | Num. of matches <sup>3</sup> | Num. of significant matches <sup>4</sup> | Num. of sequences <sup>5</sup> | Num. of significant sequences <sup>6</sup> | Num. of unique sequences <sup>7</sup> | Sequence coverage <sup>8</sup> | emPAI <sup>9</sup> |
|-----------------------|---------------------------------------------------------------------|----------------------------|--------------------|-----------------|------------------------------|------------------------------------------|--------------------------------|--------------------------------------------|---------------------------------------|--------------------------------|--------------------|
| SIRM1_HUMAN           | Serine/arginine repetitive matrix protein 1                         | 27                         | 102274             | 11.34           | 6                            | 2                                        | 3                              | 1                                          | 3                                     | 0.09                           | 0.09               |
| CSF2_HUMAN            | CSF2 antigen                                                        | 27                         | 91809              | 6.5             | 2                            | 1                                        | 2                              | 1                                          | 2                                     | 0.07                           | 0.05               |
| SORCS4_HUMAN          | Sorcs4                                                              | 27                         | 21662              | 5.32            | 5                            | 1                                        | 3                              | 1                                          | 3                                     | 0.22                           | 0.21               |
| MTXN4_HUMAN           | Methylthioester-1-phosphate isomerase                               | 27                         | 39125              | 5.89            | 2                            | 1                                        | 2                              | 1                                          | 2                                     | 0.21                           | 0.11               |
| GPIH_HUMAN            | GPI-anchored transmembrane                                          | 27                         | 45223              | 5.76            | 2                            | 1                                        | 1                              | 1                                          | 1                                     | 0.07                           | 0.1                |
| NUP88_HUMAN           | Nuclear pore complex protein Nup88                                  | 27                         | 83489              | 5.47            | 3                            | 1                                        | 2                              | 1                                          | 2                                     | 0.06                           | 0.05               |
| GDP_HUMAN             | Gammaglutamylhydrolase                                              | 27                         | 35841              | 6.67            | 1                            | 1                                        | 1                              | 1                                          | 1                                     | 0.08                           | 0.12               |
| ANX11_HUMAN           | Annexin A11                                                         | 27                         | 54355              | 7.53            | 2                            | 1                                        | 2                              | 1                                          | 2                                     | 0.07                           | 0.08               |
| IFIT1_HUMAN           | Exonuclease translation initiation factor 2 subunit 2               | 27                         | 38384              | 5.6             | 3                            | 1                                        | 3                              | 1                                          | 3                                     | 0.15                           | 0.11               |
| IFIT1_HUMAN           | Interferon-induced protein with tetranucleotide repeats 1           | 27                         | 53325              | 6.75            | 3                            | 1                                        | 3                              | 1                                          | 3                                     | 0.13                           | 0.08               |
| RRAGD_HUMAN           | Rac-related GTP-binding protein G                                   | 27                         | 44196              | 4.94            | 1                            | 1                                        | 1                              | 1                                          | 1                                     | 0.06                           | 0.1                |
| NRSF_HUMAN            | Nuclear receptor-binding factor 2                                   | 27                         | 32358              | 5.61            | 1                            | 1                                        | 1                              | 1                                          | 1                                     | 0.3                            | 0.14               |
| TARA_HUMAN            | TRIO and F-actin-binding protein                                    | 26                         | 261217             | 8.86            | 10                           | 1                                        | 7                              | 1                                          | 7                                     | 0.05                           | 0.02               |
| GCSH_HUMAN            | Glycine cleavage system H protein, mitochondrial                    | 26                         | 18873              | 4.91            | 3                            | 1                                        | 2                              | 1                                          | 2                                     | 0.29                           | 0.24               |
| CHD1_HUMAN            | Chromatin domain-containing protein 1                               | 26                         | 44812              | 8.74            | 6                            | 2                                        | 4                              | 2                                          | 4                                     | 0.26                           | 0.2                |
| NEX3_HUMAN            | Serine/threonine-protein kinase Nsk3                                | 26                         | 107100             | 5.51            | 8                            | 2                                        | 6                              | 1                                          | 6                                     | 0.13                           | 0.04               |
| ENAH_HUMAN            | Protein enabled homolog                                             | 26                         | 66470              | 6.51            | 14                           | 2                                        | 3                              | 1                                          | 3                                     | 0.08                           | 0.13               |
| PABP1_HUMAN           | Pab1 (ADP-ribosyl) polymerase 1                                     | 26                         | 113012             | 8.96            | 5                            | 1                                        | 3                              | 1                                          | 3                                     | 0.09                           | 0.04               |
| ODRP_HUMAN            | Pyruvate dehydrogenase E1 component subunit beta, mitochondrial     | 26                         | 38208              | 6.2             | 12                           | 3                                        | 3                              | 2                                          | 3                                     | 0.21                           | 0.24               |
| LONM_HUMAN            | Lon protease homolog, mitochondrial                                 | 26                         | 106422             | 6.01            | 10                           | 2                                        | 5                              | 1                                          | 5                                     | 0.16                           | 0.04               |
| FABR8_HUMAN           | Protein FABR8                                                       | 26                         | 37167              | 5.86            | 2                            | 1                                        | 2                              | 1                                          | 2                                     | 0.09                           | 0.12               |
| UBQ1L_HUMAN           | Ubiquitin-conjugating enzyme E2 G1                                  | 26                         | 19497              | 5.21            | 2                            | 1                                        | 2                              | 1                                          | 2                                     | 0.35                           | 0.23               |
| COX2_HUMAN            | Cytochrome c oxidase subunit 2                                      | 26                         | 23548              | 4.67            | 8                            | 1                                        | 3                              | 1                                          | 3                                     | 0.3                            | 0.16               |
| KDM1A_HUMAN           | Lysine-specific histone demethylase 1A                              | 26                         | 92845              | 6.11            | 5                            | 2                                        | 4                              | 1                                          | 4                                     | 0.12                           | 0.05               |
| ACCSB_HUMAN           | Short-branched chain specific acyl-CoA dehydrogenase, mitochondrial | 26                         | 74455              | 6.33            | 2                            | 1                                        | 2                              | 1                                          | 2                                     | 0.09                           | 0.09               |
| TT1L2_HUMAN           | Tubulin-tyrosine lyase-like protein 12                              | 26                         | 74356              | 5.33            | 3                            | 1                                        | 2                              | 1                                          | 2                                     | 0.06                           | 0.06               |
| PIRPA_HUMAN           | Pir-1 RNA-processing-aiding factor 8                                | 26                         | 273427             | 8.95            | 7                            | 1                                        | 5                              | 1                                          | 5                                     | 0.04                           | 0.02               |
| UMPF_HUMAN            | Uridine 5'-monophosphate synthase                                   | 25                         | 57189              | 6.61            | 1                            | 1                                        | 1                              | 1                                          | 1                                     | 0.07                           | 0.08               |
| BGN_HUMAN             | Bergen                                                              | 25                         | 73553              | 5.13            | 2                            | 1                                        | 2                              | 1                                          | 2                                     | 0.05                           | 0.06               |
| SCFD2_HUMAN           | Sec1 family domain-containing protein 2                             | 25                         | 70579              | 6.21            | 4                            | 1                                        | 3                              | 1                                          | 3                                     | 0.12                           | 0.06               |
| SMO1_HUMAN            | Small nuclear ribonucleoprotein Sm D3                               | 25                         | 13907              | 10.33           | 1                            | 1                                        | 1                              | 1                                          | 1                                     | 0.17                           | 0.34               |
| LYPL1_HUMAN           | Lysophospholipase-like protein 1                                    | 25                         | 26299              | 7.71            | 3                            | 1                                        | 2                              | 1                                          | 2                                     | 0.21                           | 0.17               |
| BET1L_HUMAN           | BET1-like protein                                                   | 25                         | 12380              | 7.88            | 3                            | 1                                        | 3                              | 1                                          | 3                                     | 0.47                           | 0.39               |
| SNR1_HUMAN            | Vacuolar-sorting protein SNR1                                       | 24                         | 28846              | 6.2             | 1                            | 1                                        | 1                              | 1                                          | 1                                     | 0.14                           | 0.15               |
| SNAG_HUMAN            | Gammaglutamyl NSF attachment protein                                | 24                         | 34724              | 5.3             | 4                            | 1                                        | 4                              | 1                                          | 4                                     | 0.24                           | 0.13               |
| TPRGL_HUMAN           | Tumor protein p27-regulated gene 1-like protein                     | 24                         | 30183              | 6.85            | 4                            | 1                                        | 4                              | 1                                          | 4                                     | 0.19                           | 0.15               |
| KPRA_HUMAN            | Phosphoribosyl pyrophosphate synthase-associated protein 1          | 24                         | 39369              | 6.73            | 2                            | 1                                        | 2                              | 1                                          | 2                                     | 0.09                           | 0.11               |
| LANC1_HUMAN           | LonC-like protein 1                                                 | 24                         | 45254              | 7.86            | 3                            | 1                                        | 2                              | 1                                          | 2                                     | 0.16                           | 0.1                |
| DESU1_HUMAN           | Desmodulin isopeptidase 1                                           | 24                         | 18251              | 4.66            | 1                            | 1                                        | 1                              | 1                                          | 1                                     | 0.15                           | 0.25               |
| ABHD8_HUMAN           | Protein ABHD11                                                      | 24                         | 34668              | 9.3             | 5                            | 1                                        | 2                              | 1                                          | 2                                     | 0.16                           | 0.13               |
| ORL1_HUMAN            | Or-like protein                                                     | 24                         | 33756              | 6.26            | 2                            | 1                                        | 2                              | 1                                          | 2                                     | 0.11                           | 0.13               |
| CCORL_HUMAN           | Coumarin-oligomer domain-containing protein 90                      | 23                         | 108106             | 9.72            | 11                           | 2                                        | 5                              | 1                                          | 5                                     | 0.09                           | 0.04               |
| DNREP1_HUMAN          | Aspartyl aminopeptidase                                             | 23                         | 52395              | 7.03            | 4                            | 1                                        | 2                              | 1                                          | 2                                     | 0.08                           | 0.08               |
| PAPR4_HUMAN           | Pab1 (ADP-ribosyl) polymerase 4                                     | 23                         | 192472             | 5.43            | 11                           | 1                                        | 7                              | 1                                          | 7                                     | 0.07                           | 0.02               |
| ERD1_HUMAN            | Squalene monooxygenase                                              | 23                         | 63882              | 8.8             | 3                            | 1                                        | 2                              | 1                                          | 2                                     | 0.06                           | 0.07               |
| PLCG1_HUMAN           | 1-phosphatidylinositol 4,5-bisphosphate phosphodiesterase gamma-1   | 23                         | 148438             | 5.73            | 5                            | 1                                        | 4                              | 1                                          | 4                                     | 0.06                           | 0.03               |
| ELP1_HUMAN            | Elongator complex protein 5                                         | 23                         | 110158             | 6.61            | 2                            | 2                                        | 2                              | 1                                          | 2                                     | 0.03                           | 0.03               |
| INT3_HUMAN            | Integrator complex subunit 3                                        | 23                         | 117994             | 5.53            | 5                            | 1                                        | 4                              | 1                                          | 4                                     | 0.1                            | 0.04               |
| USP7_HUMAN            | Ubiquitin carboxyl-terminal hydrolase 7                             | 23                         | 126220             | 5.33            | 6                            | 2                                        | 5                              | 1                                          | 5                                     | 0.11                           | 0.03               |
| YPS2_HUMAN            | Protein YPS2                                                        | 23                         | 38223              | 5.47            | 1                            | 1                                        | 1                              | 1                                          | 1                                     | 0.07                           | 0.22               |
| CSPP2_HUMAN           | Variation core protein                                              | 23                         | 372590             | 4.43            | 5                            | 1                                        | 3                              | 1                                          | 3                                     | 0.02                           | 0.01               |
| TRPF_HUMAN            | Thyroid receptor-interacting protein 6                              | 23                         | 90255              | 7.19            | 3                            | 1                                        | 1                              | 1                                          | 1                                     | 0.09                           | 0.09               |
| TTG1_HUMAN            | Tetratricopeptide repeat protein 1                                  | 23                         | 23505              | 4.78            | 2                            | 1                                        | 2                              | 1                                          | 2                                     | 0.2                            | 0.13               |
| RANL_HUMAN            | Ran-specific GTPase-activating protein                              | 23                         | 23286              | 5.19            | 5                            | 1                                        | 2                              | 1                                          | 2                                     | 0.15                           | 0.19               |
| COMD1_HUMAN           | COMD domain-containing protein 5                                    | 22                         | 24555              | 6.52            | 2                            | 1                                        | 1                              | 1                                          | 1                                     | 0.18                           | 0.18               |
| MA2B2_HUMAN           | Epididymis-specific alpha-mannosidase                               | 22                         | 113988             | 6.74            | 2                            | 1                                        | 2                              | 1                                          | 2                                     | 0.05                           | 0.04               |
| PDS2_HUMAN            | GPI transmembrane component PDS2                                    | 22                         | 61617              | 6.05            | 2                            | 1                                        | 1                              | 1                                          | 1                                     | 0.05                           | 0.07               |
| MAREL_HUMAN           | Microtubule-associated protein RP/EB family member 3                | 22                         | 31962              | 5.35            | 2                            | 1                                        | 1                              | 1                                          | 1                                     | 0.09                           | 0.14               |
| HEAT1_HUMAN           | HEAT repeat-containing protein 1                                    | 22                         | 242215             | 6.11            | 7                            | 1                                        | 6                              | 1                                          | 6                                     | 0.05                           | 0.02               |
| VPS16_HUMAN           | Vacuolar protein sorting-associated protein 16 homolog              | 22                         | 94634              | 6.32            | 2                            | 1                                        | 2                              | 1                                          | 2                                     | 0.05                           | 0.05               |
| VMP1_HUMAN            | Vacuole membrane protein 1                                          | 22                         | 46208              | 6.47            | 3                            | 1                                        | 1                              | 1                                          | 1                                     | 0.07                           | 0.09               |
| TBCD3_HUMAN           | TBC1 domain family member 23                                        | 22                         | 78272              | 5.23            | 2                            | 1                                        | 1                              | 1                                          | 1                                     | 0.04                           | 0.05               |
| PSJ1_HUMAN            | PDZ and LIM domain protein 1                                        | 22                         | 36048              | 6.56            | 7                            | 1                                        | 7                              | 1                                          | 7                                     | 0.14                           | 0.12               |
| GRB2_HUMAN            | Growth factor receptor-bound protein 2                              | 22                         | 25190              | 5.89            | 2                            | 1                                        | 1                              | 1                                          | 1                                     | 0.13                           | 0.18               |
| PAK1_HUMAN            | Pak1b                                                               | 21                         | 64464              | 5.8             | 6                            | 1                                        | 5                              | 1                                          | 5                                     | 0.2                            | 0.07               |
| WFS1_HUMAN            | Wfs1 protein                                                        | 21                         | 100227             | 6.34            | 2                            | 1                                        | 2                              | 1                                          | 2                                     | 0.03                           | 0.04               |
| CEP41_HUMAN           | Centrosomal protein of 41 kDa                                       | 21                         | 41343              | 8.46            | 2                            | 1                                        | 2                              | 1                                          | 2                                     | 0.14                           | 0.11               |
| QLTP_HUMAN            | Glycylserine transfer protein                                       | 21                         | 23324              | 6.9             | 3                            | 1                                        | 2                              | 1                                          | 2                                     | 0.29                           | 0.19               |
| VPS53_HUMAN           | Vacuolar protein sorting-associated protein 53 homolog              | 21                         | 78602              | 5.74            | 3                            | 1                                        | 3                              | 1                                          | 3                                     | 0.14                           | 0.05               |
| ACADM_HUMAN           | Medium-chain specific acyl-CoA dehydrogenase, mitochondrial         | 20                         | 46559              | 6.61            | 5                            | 1                                        | 2                              | 1                                          | 2                                     | 0.1                            | 0.09               |
| CHS6B_HUMAN           | Cytochrome c oxidase subunit (b)                                    | 20                         | 10186              | 6.54            | 7                            | 1                                        | 6                              | 1                                          | 6                                     | 0.45                           | 0.49               |
| RM44_HUMAN            | 38S ribosomal protein L44, mitochondrial                            | 20                         | 37512              | 6.84            | 1                            | 1                                        | 1                              | 1                                          | 1                                     | 0.12                           | 0.12               |
| SNR3_HUMAN            | Sorting reagent                                                     | 20                         | 66550              | 5.4             | 3                            | 1                                        | 3                              | 1                                          | 3                                     | 0.13                           | 0.06               |
| PTPRR_HUMAN           | Serine/threonine-protein phosphatase 6 regulatory subunit 2         | 20                         | 104676             | 6.74            | 4                            | 1                                        | 4                              | 1                                          | 4                                     | 0.11                           | 0.04               |
| ORL3_HUMAN            | Orlike receptor-like factor 3                                       | 19                         | 49735              | 5.01            | 3                            | 1                                        | 2                              | 1                                          | 2                                     | 0.13                           | 0.09               |
| MG10_HUMAN            | MCO5 complex subunit MG10                                           | 19                         | 8802               | 6.69            | 3                            | 1                                        | 1                              | 1                                          | 1                                     | 0.41                           | 0.58               |
| SYDM_HUMAN            | Aspartate-tRNA ligase, mitochondrial                                | 19                         | 73516              | 8.19            | 4                            | 3                                        | 1                              | 1                                          | 1                                     | 0.04                           | 0.06               |
| NUT14_HUMAN           | Nuclear pore complex protein Nup14                                  | 19                         | 213488             | 7.15            | 1                            | 1                                        | 1                              | 1                                          | 1                                     | 0.02                           | 0.02               |
| GRM1_HUMAN            | GRAM domain-containing protein 1A                                   | 19                         | 89520              | 6.26            | 2                            | 1                                        | 1                              | 1                                          | 1                                     | 0.05                           | 0.05               |
| EP3B1_HUMAN           | Epidermal growth factor receptor kinase substrate 8                 | 19                         | 91824              | 7.1             | 3                            | 1                                        | 3                              | 1                                          | 3                                     | 0.08                           | 0.05               |
| CPN1_HUMAN            | Anion-exchange                                                      | 19                         | 33561              | 5.44            | 4                            | 1                                        | 4                              | 1                                          | 4                                     | 0.17                           | 0.13               |
| MGST1_HUMAN           | Microsomal glutathione S-transferase 3                              | 19                         | 16596              | 9.46            | 3                            | 2                                        | 1                              | 1                                          | 1                                     | 0.18                           | 0.26               |
| RAV1_HUMAN            | Ribonucleoprotein PTP-binding 1                                     | 19                         | 63837              | 8.79            | 4                            | 1                                        | 2                              | 1                                          | 2                                     | 0.11                           | 0.07               |
| MOP1_HUMAN            | Malik-related tyrosine phosphatase 1                                | 19                         | 55016              | 7.53            | 2                            | 1                                        | 2                              | 1                                          | 2                                     | 0.09                           | 0.09               |
| GOSR2_HUMAN           | Gq12 SNAP receptor complex member 2                                 | 19                         | 24760              | 7.85            | 1                            | 1                                        | 1                              | 1                                          | 1                                     | 0.09                           | 0.18               |
| VPS33_HUMAN           | Vacuolar protein sorting-associated protein 33A                     | 19                         | 67568              | 6.5             | 6                            | 1                                        | 3                              | 1                                          | 3                                     | 0.13                           | 0.06               |
| MCM2_HUMAN            | DNA replication licensing factor-MCM2                               | 18                         | 101832             | 5.24            | 5                            | 1                                        | 4                              | 1                                          | 4                                     | 0.09                           | 0.04               |
| CYBP_HUMAN            | Calyculin-binding protein                                           | 18                         | 26194              | 8.28            | 3                            | 1                                        | 2                              | 1                                          | 2                                     | 0.19                           | 0.17               |
| EMC10_HUMAN           | ERM membrane protein complex subunit 10                             | 18                         | 17330              | 5.78            | 1                            | 1                                        | 1                              | 1                                          | 1                                     | 0.14                           | 0.16               |
| DHX15_HUMAN           | Pir-1 RNA-binding factor ATP-dependent RNA helicase DHX15           | 18                         | 98375              | 7.12            | 5                            | 1                                        | 4                              | 1                                          | 4                                     | 0.13                           | 0.05               |
| PAPR9_HUMAN           | Pab1 (ADP-ribosyl) polymerase 9                                     | 18                         | 98281              | 6.12            | 2                            | 1                                        | 2                              | 1                                          | 2                                     | 0.04                           | 0.04               |
| SLH47_HUMAN           | Sodium/hydrogen exchanger 7                                         | 18                         | 80580              | 5.97            | 1                            | 1                                        | 1                              | 1                                          | 1                                     | 0.03                           | 0.05               |
| SELO_HUMAN            | Selenoprotein O                                                     | 18                         | 73444              | 5.69            | 2                            | 1                                        | 2                              | 1                                          | 2                                     | 0.08                           | 0.06               |
| NCOX1_HUMAN           | Neurochordin                                                        | 17                         | 78814              | 5.34            | 7                            | 1                                        | 6                              | 1                                          | 6                                     | 0.13                           | 0.05               |
| PGLT1_HUMAN           | Protein O-methylglucuronidase 1                                     | 17                         | 46159              | 6.91            | 1                            | 1                                        | 1                              | 1                                          | 1                                     | 0.08                           | 0.09               |
| CUJ_HUMAN             | Clustered mitochondria protein homolog                              | 17                         | 146577             | 5.75            | 5                            | 1                                        | 5                              | 1                                          | 5                                     | 0.09                           | 0.03               |
| DDH1D_HUMAN           | Dc2-hydroxyglutarate dehydrogenase, mitochondrial                   | 16                         | 56380              | 8.21            | 2                            | 1                                        | 1                              | 1                                          | 1                                     | 0.05                           | 0.08               |
| DSR4C_HUMAN           | Dual-specific RNA-dependent adenosine deaminase                     | 15                         | 13581              | 8.86            | 4                            | 1                                        | 4                              | 1                                          | 4                                     | 0.06                           | 0.03               |
| PHAGE_HUMAN           | Bisphosphoglycerate mutase                                          | 14                         | 29897              | 6.1             | 1                            | 1                                        | 1                              | 1                                          | 1                                     | 0.12                           | 0.15               |
| EXOS4_HUMAN           | Exosome complex component MTR3                                      | 14                         | 28218              | 6.06            | 2                            | 1                                        | 1                              | 1                                          | 1                                     | 0.13                           | 0.16               |

<sup>1</sup>Protein score is calculated from the score of the peptide attributed to the protein.

<sup>2</sup>pI is (Predicted) isoelectric point.

<sup>3</sup>Number of matches is spectrum number matched to protein<sup>1</sup>.

<sup>4</sup>Number of significant matches is spectrum number that matches protein and exceeds the identification criteria.

<sup>5</sup>Number of sequences is number of peptides matched to protein<sup>2</sup>.

<sup>6</sup>Number of significant sequences is number of peptides exceeding the identification criteria matched to proteins.

<sup>7</sup>Number of unique sequences is a unique<sup>3</sup> number of peptides matched to proteins.

<sup>8</sup>Sequence coverage is the ratio of the total number of matched peptide residues to the total length of the protein.

<sup>9</sup>Exponentially Modified Protein Abundance Index ([http://www.ma.biology.mcgill.ca/help/quant\\_help.html](http://www.ma.biology.mcgill.ca/help/quant_help.html)).

**Table S2.** Identification of endogenous proteins contained in hADSC cultured in medium, DMEM/10% FBS.

| UniProt/MSS-PROT ID | Description                                                    | Protein score <sup>a</sup> | Protein mass (kDa) | pI <sup>b</sup> | Num. of matches <sup>c</sup> | Num. of significant matches <sup>d</sup> | Num. of sequences <sup>e</sup> | Num. of significant sequences <sup>f</sup> | Num. of unique sequences <sup>g</sup> | Sequence coverage <sup>h</sup> | empPAF |
|---------------------|----------------------------------------------------------------|----------------------------|--------------------|-----------------|------------------------------|------------------------------------------|--------------------------------|--------------------------------------------|---------------------------------------|--------------------------------|--------|
| MYH9_HUMAN          | Myosin-9                                                       | 7632                       | 226392             | 5.5             | 539                          | 301                                      | 139                            | 91                                         | 119                                   | 8.69                           | 6.6    |
| MYH10_HUMAN         | Myosin-10                                                      | 1255                       | 228938             | 5.44            | 96                           | 47                                       | 50                             | 26                                         | 32                                    | 0.33                           | 0.67   |
| MYH14_HUMAN         | Myosin-14                                                      | 294                        | 227132             | 5.52            | 33                           | 14                                       | 19                             | 7                                          | 12                                    | 0.11                           | 0.14   |
| FLNA_HUMAN          | Filamin-A                                                      | 6172                       | 280564             | 5.7             | 620                          | 309                                      | 114                            | 85                                         | 105                                   | 0.63                           | 3.2    |
| FLNB_HUMAN          | Filamin-B                                                      | 2286                       | 299541             | 5.85            | 194                          | 123                                      | 66                             | 41                                         | 20                                    | 0.52                           | 1.44   |
| FLNC_HUMAN          | Filamin-C                                                      | 1082                       | 277890             | 5.47            | 95                           | 49                                       | 59                             | 32                                         | 49                                    | 0.41                           | 0.64   |
| VIME_HUMAN          | Vimentin                                                       | 6140                       | 53619              | 5.06            | 804                          | 380                                      | 61                             | 50                                         | 15                                    | 0.89                           | 132.88 |
| TUB1_HUMAN          | Tubulin                                                        | 2604                       | 20559              | 5.71            | 225                          | 145                                      | 63                             | 60                                         | 26                                    | 0.59                           | 1.93   |
| TUB2_HUMAN          | Tubulin-2                                                      | 161                        | 271443             | 5.4             | 20                           | 9                                        | 16                             | 5                                          | 9                                     | 0.1                            | 0.08   |
| LDHA_HUMAN          | L-lactate dehydrogenase A chain                                | 3474                       | 36865              | 8.44            | 248                          | 158                                      | 22                             | 15                                         | 15                                    | 0.8                            | 6.7    |
| LDHB_HUMAN          | L-lactate dehydrogenase B chain                                | 760                        | 36815              | 5.21            | 81                           | 40                                       | 15                             | 11                                         | 13                                    | 0.6                            | 3.37   |
| ACTN1_HUMAN         | Alpha-actinin-1                                                | 3222                       | 102993             | 5.25            | 246                          | 141                                      | 50                             | 36                                         | 10                                    | 0.71                           | 4.73   |
| ACTN2_HUMAN         | Alpha-actinin-2                                                | 1980                       | 104768             | 5.27            | 185                          | 94                                       | 46                             | 31                                         | 28                                    | 0.67                           | 2.59   |
| ENO4_HUMAN          | Alpha-enolase                                                  | 3169                       | 47139              | 7.01            | 182                          | 103                                      | 27                             | 19                                         | 17                                    | 0.74                           | 7.32   |
| ENO3_HUMAN          | Gamma-enolase                                                  | 510                        | 47239              | 4.91            | 29                           | 14                                       | 7                              | 5                                          | 2                                     | 0.25                           | 0.7    |
| GDP_HUMAN           | Glyceroldehyde-3-phosphate dehydrogenase                       | 2932                       | 36300              | 6.57            | 224                          | 103                                      | 19                             | 14                                         | 9                                     | 0.77                           | 13.13  |
| KPF10_HUMAN         | Pyruvate kinase PKM                                            | 2871                       | 57900              | 7.96            | 221                          | 147                                      | 39                             | 33                                         | 6                                     | 0.78                           | 16.79  |
| TBB2A_HUMAN         | Tubulin beta-2A chain                                          | 2307                       | 49875              | 4.79            | 222                          | 132                                      | 28                             | 23                                         | 5                                     | 0.81                           | 14.77  |
| TBB2B_HUMAN         | Tubulin beta-2B chain                                          | 1150                       | 49925              | 4.77            | 130                          | 60                                       | 28                             | 20                                         | 13                                    | 0.92                           | 7.08   |
| ALDOA_HUMAN         | Fructose-bisphosphate aldolase A                               | 2982                       | 39395              | 8.3             | 184                          | 96                                       | 25                             | 16                                         | 25                                    | 0.8                            | 11.58  |
| PFIC2_HUMAN         | Phenyl                                                         | 2184                       | 531468             | 5.24            | 181                          | 92                                       | 36                             | 70                                         | 25                                    | 0.26                           | 0.56   |
| FINC_HUMAN          | Fibronectin                                                    | 1999                       | 262480             | 5.46            | 154                          | 93                                       | 60                             | 40                                         | 60                                    | 0.45                           | 0.86   |
| CODA2_HUMAN         | Codan alpha-2(VI) chain                                        | 1888                       | 343437             | 6.26            | 100                          | 73                                       | 55                             | 40                                         | 55                                    | 0.21                           | 0.67   |
| IQGAP1_HUMAN        | Ras GTPase-activating protein (GAP)                            | 1827                       | 180124             | 6.08            | 116                          | 73                                       | 53                             | 36                                         | 53                                    | 0.29                           | 1.43   |
| GRP78_HUMAN         | 78 kDa glucose-regulated protein                               | 1815                       | 72288              | 5.67            | 169                          | 102                                      | 33                             | 25                                         | 28                                    | 0.69                           | 3.76   |
| HSP17A_HUMAN        | Heat shock 70 kDa protein 1A                                   | 315                        | 70309              | 5.68            | 37                           | 17                                       | 20                             | 11                                         | 16                                    | 0.56                           | 0.92   |
| DYRK1_HUMAN         | Cytosolic kinase 1 heavy chain 1                               | 1743                       | 532072             | 6.01            | 135                          | 80                                       | 84                             | 53                                         | 64                                    | 0.3                            | 0.92   |
| EPZ_HUMAN           | Elongation factor 2                                            | 1628                       | 95277              | 6.41            | 118                          | 70                                       | 42                             | 26                                         | 42                                    | 0.62                           | 2.73   |
| UBA1_HUMAN          | Ubiquitin-like modifier-activating enzyme 1                    | 1601                       | 117374             | 5.69            | 96                           | 65                                       | 26                             | 61                                         | 20                                    | 0.61                           | 2.01   |
| GSTP1_HUMAN         | Glutathione S-transferase P                                    | 1593                       | 23341              | 5.43            | 74                           | 57                                       | 15                             | 13                                         | 15                                    | 0.92                           | 16.03  |
| PDAT1_HUMAN         | Protein disulfide-isomerase                                    | 1552                       | 57081              | 4.76            | 160                          | 77                                       | 32                             | 18                                         | 32                                    | 0.61                           | 3.01   |
| LEIF1_HUMAN         | LEIF-1 protein, alpha                                          | 214                        | 28201              | 4.76            | 22                           | 9                                        | 11                             | 5                                          | 9                                     | 0.32                           | 1.06   |
| TUBA1C_HUMAN        | Tubulin alpha-1C chain                                         | 1127                       | 49863              | 4.96            | 131                          | 71                                       | 25                             | 22                                         | 1                                     | 0.75                           | 7.79   |
| SEPT9_HUMAN         | Septin-9                                                       | 1461                       | 46417              | 8.75            | 93                           | 62                                       | 24                             | 21                                         | 62                                    | 0.54                           | 5.58   |
| WDH1_HUMAN          | WD repeat-containing protein 1                                 | 1454                       | 68152              | 6.37            | 63                           | 46                                       | 23                             | 18                                         | 23                                    | 0.68                           | 2.11   |
| EMF_HUMAN           | Endomembrin                                                    | 1433                       | 92411              | 4.76            | 126                          | 68                                       | 42                             | 28                                         | 12                                    | 0.55                           | 2.88   |
| TBR1_HUMAN          | Transcriptional endoplasmic reticulum ATPase                   | 1363                       | 89266              | 5.14            | 60                           | 26                                       | 58                             | 26                                         | 58                                    | 0.35                           | 3.08   |
| ANKK_HUMAN          | Neuroblast differentiation-associated protein ANKAK            | 1329                       | 62699              | 5.8             | 244                          | 85                                       | 135                            | 57                                         | 135                                   | 0.33                           | 0.46   |
| CO1A1_HUMAN         | Codan alpha-1(I) chain                                         | 1314                       | 13857              | 5.6             | 165                          | 78                                       | 40                             | 30                                         | 12                                    | 0.53                           | 1.55   |
| QARS_HUMAN          | Cysteine-tRNA ligase                                           | 1311                       | 83119              | 6.61            | 81                           | 48                                       | 30                             | 20                                         | 30                                    | 0.61                           | 2.18   |
| GKAP4_HUMAN         | Cytoskeleton-associated protein 4                              | 1302                       | 65983              | 5.83            | 99                           | 44                                       | 28                             | 16                                         | 28                                    | 0.58                           | 1.93   |
| ANKA2_HUMAN         | Annexin A2                                                     | 1284                       | 28550              | 7.27            | 167                          | 86                                       | 29                             | 25                                         | 29                                    | 0.79                           | 8.56   |
| MAP1B_HUMAN         | Microtubulin-associated protein 1B                             | 1251                       | 270468             | 4.73            | 87                           | 57                                       | 51                             | 37                                         | 51                                    | 0.36                           | 0.68   |
| VDAC1_HUMAN         | Voltage-dependent anion-selective channel protein 1            | 1245                       | 30754              | 8.62            | 47                           | 34                                       | 16                             | 12                                         | 16                                    | 0.76                           | 4.77   |
| LRP1_HUMAN          | Protein-tyrosine phosphatase receptor-related protein 1        | 1218                       | 104278             | 5.16            | 63                           | 48                                       | 37                             | 30                                         | 47                                    | 0.23                           | 0.53   |
| ANKA5_HUMAN         | Annexin A5                                                     | 1182                       | 35914              | 4.94            | 103                          | 54                                       | 22                             | 24                                         | 12                                    | 0.74                           | 6.89   |
| PDAT2_HUMAN         | Protein disulfide-isomerase A3                                 | 1177                       | 56747              | 5.88            | 93                           | 53                                       | 27                             | 18                                         | 3                                     | 0.69                           | 3.04   |
| VINC_HUMAN          | Vinculin                                                       | 1153                       | 123722             | 5.5             | 89                           | 51                                       | 38                             | 21                                         | 38                                    | 0.45                           | 1.1    |
| DPFV2_HUMAN         | Dihydropyrimidinase-related protein 2                          | 1146                       | 62255              | 5.95            | 77                           | 48                                       | 25                             | 17                                         | 21                                    | 0.71                           | 2.82   |
| DPFV1_HUMAN         | Dihydropyrimidinase-related protein 3                          | 541                        | 61824              | 6.04            | 29                           | 21                                       | 17                             | 11                                         | 14                                    | 0.67                           | 1.4    |
| OHMT_HUMAN          | 60 kDa heat shock protein, mitochondrial                       | 1100                       | 61016              | 5.7             | 48                           | 36                                       | 20                             | 16                                         | 20                                    | 0.52                           | 2.2    |
| PAHA1_HUMAN         | ProHsp44-hydrolyase subunit alpha-1                            | 1084                       | 61011              | 5.7             | 51                           | 32                                       | 19                             | 14                                         | 19                                    | 0.52                           | 1.6    |
| PGP1_HUMAN          | Phosphoglycerate kinase 1                                      | 1076                       | 44586              | 8.3             | 75                           | 40                                       | 23                             | 15                                         | 5                                     | 0.68                           | 2.45   |
| HYOU1_HUMAN         | Hypoxia-upregulated protein 1                                  | 1070                       | 111266             | 5.16            | 52                           | 35                                       | 20                             | 13                                         | 20                                    | 0.38                           | 0.69   |
| MYO1_HUMAN          | Major myosin protein                                           | 1051                       | 99586              | 5.34            | 56                           | 40                                       | 23                             | 14                                         | 23                                    | 0.46                           | 0.8    |
| ATPA_HUMAN          | ATP synthase subunit alpha, mitochondrial                      | 1048                       | 59174              | 9.16            | 55                           | 27                                       | 21                             | 13                                         | 21                                    | 0.54                           | 1.85   |
| TOPB_HUMAN          | T-complex protein 1 subunit beta                               | 1046                       | 57452              | 6.01            | 46                           | 34                                       | 22                             | 17                                         | 22                                    | 0.62                           | 2.43   |
| CO1A2_HUMAN         | Codan alpha-2(VII) chain                                       | 1038                       | 129235             | 9.98            | 71                           | 41                                       | 32                             | 20                                         | 32                                    | 0.45                           | 0.91   |
| CODA1_HUMAN         | Codan alpha-1(XII) chain                                       | 1034                       | 332941             | 5.38            | 73                           | 40                                       | 47                             | 23                                         | 47                                    | 0.26                           | 0.74   |
| RIBL_HUMAN          | Ribonuclease inhibitor                                         | 1004                       | 49941              | 4.71            | 53                           | 36                                       | 19                             | 15                                         | 19                                    | 0.61                           | 2.49   |
| MOES_HUMAN          | Myosin                                                         | 967                        | 97778              | 6.08            | 77                           | 38                                       | 29                             | 17                                         | 38                                    | 0.56                           | 2.03   |
| TSP1_HUMAN          | Thrombospondin-1                                               | 958                        | 129300             | 4.71            | 98                           | 54                                       | 19                             | 29                                         | 29                                    | 0.35                           | 0.79   |
| ADCK1_HUMAN         | Adenylate cyclase-associated protein 1                         | 831                        | 51889              | 8.24            | 79                           | 37                                       | 20                             | 12                                         | 5                                     | 0.56                           | 2.68   |
| ACLY_HUMAN          | ATP-citrate lyase                                              | 933                        | 125762             | 6.85            | 68                           | 39                                       | 34                             | 22                                         | 34                                    | 0.49                           | 1.22   |
| MARCKS_HUMAN        | Myristoylated alanine-rich C-kinase substrate                  | 928                        | 31836              | 4.67            | 116                          | 69                                       | 5                              | 5                                          | 5                                     | 0.35                           | 1.2    |
| CODA3_HUMAN         | Codan alpha-1(VI) chain                                        | 903                        | 108462             | 5.26            | 45                           | 37                                       | 16                             | 21                                         | 16                                    | 0.37                           | 0.85   |
| LMY2_HUMAN          | LLM domain only protein 7                                      | 894                        | 192576             | 8.34            | 56                           | 29                                       | 27                             | 16                                         | 27                                    | 0.27                           | 0.45   |
| CAH2_HUMAN          | Calnexin-2 catalytic subunit                                   | 881                        | 79945              | 4.87            | 58                           | 34                                       | 26                             | 16                                         | 20                                    | 0.54                           | 1.7    |
| LEI1_HUMAN          | Calnexin-1                                                     | 877                        | 14706              | 5.24            | 129                          | 50                                       | 11                             | 11                                         | 11                                    | 0.87                           | 6.06   |
| CALD1_HUMAN         | Caldesmon                                                      | 871                        | 93175              | 5.82            | 90                           | 39                                       | 22                             | 13                                         | 22                                    | 0.3                            | 0.79   |
| FSN1_HUMAN          | Fusin                                                          | 854                        | 54896              | 6.24            | 44                           | 28                                       | 17                             | 13                                         | 17                                    | 0.56                           | 1.92   |
| CODP1_HUMAN         | Coatomer subunit gamma-1                                       | 846                        | 97655              | 5.22            | 42                           | 23                                       | 23                             | 13                                         | 23                                    | 0.5                            | 0.74   |
| CODP2_HUMAN         | Coatomer subunit gamma-2                                       | 151                        | 97560              | 5.56            | 10                           | 5                                        | 7                              | 3                                          | 5                                     | 0.12                           | 0.14   |
| STAT1_HUMAN         | Signal transducer and activator of transcription 1--alpha/beta | 845                        | 87280              | 5.74            | 41                           | 27                                       | 21                             | 14                                         | 21                                    | 0.4                            | 0.96   |
| TRXR1_HUMAN         | Thioredoxin reductase 1, cytosolic                             | 842                        | 70862              | 7.16            | 37                           | 27                                       | 20                             | 15                                         | 20                                    | 0.49                           | 1.57   |
| SVAC1_HUMAN         | Alarmin--tRNA ligase, cytosolic                                | 833                        | 106743             | 5.24            | 48                           | 35                                       | 26                             | 20                                         | 26                                    | 0.47                           | 1.19   |
| COTL1_HUMAN         | Cotlin-1                                                       | 832                        | 18691              | 8.22            | 52                           | 34                                       | 11                             | 9                                          | 9                                     | 0.57                           | 6.37   |
| SEDA_HUMAN          | D--phenylglyoxylate dehydrogenase                              | 831                        | 58614              | 6.29            | 40                           | 34                                       | 19                             | 16                                         | 3                                     | 0.58                           | 2.77   |
| GLIS1_HUMAN         | Glis1                                                          | 816                        | 85844              | 5.9             | 57                           | 39                                       | 19                             | 14                                         | 19                                    | 0.52                           | 1.18   |
| PROT1_HUMAN         | Profilin-1                                                     | 808                        | 15045              | 8.44            | 88                           | 48                                       | 13                             | 8                                          | 13                                    | 0.44                           | 16.75  |
| TAGL_HUMAN          | Transgelin                                                     | 804                        | 22598              | 8.87            | 131                          | 47                                       | 18                             | 14                                         | 18                                    | 0.95                           | 21.18  |
| CAT1_HUMAN          | Cathepsin D                                                    | 799                        | 44524              | 6.1             | 57                           | 35                                       | 18                             | 12                                         | 18                                    | 0.6                            | 3.07   |
| TPM1_HUMAN          | Tropomyosin alpha-1 chain                                      | 789                        | 28504              | 4.87            | 87                           | 44                                       | 18                             | 10                                         | 10                                    | 0.54                           | 3.27   |
| TPM2_HUMAN          | Tropomyosin alpha-2 chain                                      | 222                        | 23689              | 4.89            | 85                           | 22                                       | 21                             | 11                                         | 12                                    | 0.46                           | 3.05   |
| TRT1_HUMAN          | Trentholectin                                                  | 783                        | 87835              | 7.58            | 55                           | 36                                       | 21                             | 16                                         | 21                                    | 0.55                           | 1.85   |
| TOPP_HUMAN          | T-complex protein 1 subunit alpha                              | 761                        | 59329              | 7.55            | 44                           | 29                                       | 20                             | 16                                         | 20                                    | 0.58                           | 2.08   |
| QANAS_HUMAN         | Neutral alpha-glucosidase A5                                   | 740                        | 108007             | 5.74            | 63                           | 36                                       | 32                             | 19                                         | 32                                    | 0.6                            | 1.38   |
| SYWC_HUMAN          | Trypsinogen--tRNA ligase, cytosolic                            | 760                        | 53132              | 5.83            | 43                           | 27                                       | 19                             | 15                                         | 2                                     | 0.82                           | 2.5    |
| ANKA1_HUMAN         | Annexin A1                                                     | 759                        | 38890              | 6.57            | 95                           | 31                                       | 18                             | 12                                         | 18                                    | 0.65                           | 2.62   |
| PEBP1_HUMAN         | Phenylaldehyde ammonia--binding protein 1                      | 754                        | 21044              | 7.01            | 24                           | 17                                       | 7                              | 6                                          | 7                                     | 0.62                           | 2.23   |
| AMPK1_HUMAN         | Adenosine phosphatase                                          | 741                        | 109471             | 5.31            | 66                           | 39                                       | 34                             | 20                                         | 34                                    | 0.49                           | 1.07   |
| ANKA3_HUMAN         | Annexin A3                                                     | 739                        | 75828              | 5.42            | 89                           | 38                                       | 40                             | 20                                         | 40                                    | 0.68                           | 2.01   |
| SPBL1_HUMAN         | Serpin B6                                                      | 737                        | 42594              | 5.18            | 30                           | 22                                       | 16                             | 11                                         | 16                                    | 0.55                           | 1.93   |
| GDB1_HUMAN          | Rab GDP dissociation inhibitor beta                            | 733                        | 50831              | 6.11            | 53                           | 30                                       | 23                             | 14                                         | 17                                    | 0.71                           | 2.44   |
| GDB2_HUMAN          | Rab GDP dissociation inhibitor alpha                           | 286                        | 50550              | 5               | 31                           | 22                                       | 15                             | 14                                         | 9                                     | 0.58                           | 2.17   |
| PFKAP_HUMAN         | ATP-dependent 6-phosphofructokinase, placental type            | 733                        | 85542              | 7.5             | 48                           | 28                                       | 27                             | 16                                         | 23                                    | 0.59                           | 1.18   |
| PFKAL_HUMAN         | ATP-dependent 6-phosphofructokinase, liver type                | 264                        | 84844              | 7.26            | 15                           | 8                                        | 9                              | 5                                          | 8                                     | 0.21                           | 0.28   |
| ECDA_HUMAN          | Trifunctional enzyme subunit alpha, mitochondrial              | 733                        | 82947              | 9.16            | 38                           | 26                                       | 17                             | 12                                         | 17                                    | 0.4                            | 0.93   |
| SHD1_HUMAN          | Staphylococcal nuclease domain-containing protein 1            | 730                        | 101934             | 6.74            | 52                           | 33                                       | 30                             | 18                                         | 30                                    | 0.44                           | 1.09   |
| SEPT2_HUMAN         | Septin-2                                                       | 729                        | 41461              | 6.15            | 36                           | 29                                       | 14                             | 12                                         | 13                                    | 0.57                           | 2.68   |

<sup>a</sup>Protein score is calculated from the score of the peptide attributed to the protein.  
<sup>b</sup>pI is (Predicted) isoelectric point.  
<sup>c</sup>Number of matches is spectrum number matched to protein<sup>1</sup>.  
<sup>d</sup>Number of significant matches is spectrum number that matches protein and exceeds the identification criteria.  
<sup>e</sup>Number of sequences is number of peptides matched to protein<sup>1</sup>.  
<sup>f</sup>Number of significant sequences is number of peptides exceeding the identification criteria matched to proteins.  
<sup>g</sup>Number of unique sequences is a unique<sup>1</sup> number of peptides matched to proteins.  
<sup>h</sup>Sequence coverage is the ratio of the total number of matched peptide residues to the total length of the protein.  
<sup>i</sup>Exponentially Modified Protein Abundance Index ([http://www.matrixscience.com/help/quant\\_empai\\_help.html](http://www.matrixscience.com/help/quant_empai_help.html)).

Table S2, Cont 1.

| UniProt/Swiss-Prot ID | Description                                                                       | Protein score <sup>a</sup> | Protein mass (kDa) | pI <sup>b</sup> | Num. of matches <sup>c</sup> | Num. of significant matches <sup>d</sup> | Num. of sequences <sup>e</sup> | Num. of significant sequences <sup>f</sup> | Num. of unique sequences <sup>g</sup> | Sequence coverage <sup>h</sup> | emPAI <sup>i</sup> |       |
|-----------------------|-----------------------------------------------------------------------------------|----------------------------|--------------------|-----------------|------------------------------|------------------------------------------|--------------------------------|--------------------------------------------|---------------------------------------|--------------------------------|--------------------|-------|
| STP2L_HUMAN           | Bifunctional glutamate-proline-4-irRNA ligase                                     | 725                        | 170483             | 7.02            | 58                           | 32                                       | 35                             | 20                                         | 35                                    | 0.39                           | 0.63               |       |
| FAS_HUMAN             | Fatty acid synthase                                                               | 716                        | 273254             | 6.91            | 67                           | 40                                       | 42                             | 25                                         | 42                                    | 0.31                           | 0.47               |       |
| TOP2Z_HUMAN           | T-complex protein 1 subunit zeta                                                  | 712                        | 57888              | 6.23            | 39                           | 27                                       | 22                             | 15                                         | 22                                    | 0.65                           | 1.94               |       |
| MYOF_HUMAN            | Myofibrin                                                                         | 708                        | 234581             | 5.84            | 78                           | 39                                       | 51                             | 26                                         | 51                                    | 0.37                           | 0.88               |       |
| TPIS_HUMAN            | Troponin phosphatase isomerase                                                    | 705                        | 30772              | 5.85            | 64                           | 39                                       | 16                             | 12                                         | 11                                    | 0.77                           | 4.77               |       |
| CTNA1_HUMAN           | Catenin alpha-1                                                                   | 691                        | 100009             | 5.95            | 24                           | 19                                       | 21                             | 13                                         | 19                                    | 0.38                           | 0.72               |       |
| SEPR_HUMAN            | Profilin endoprotease FAP                                                         | 690                        | 87657              | 6.21            | 46                           | 22                                       | 26                             | 19                                         | 26                                    | 0.46                           | 1.47               |       |
| CPNS1_HUMAN           | Capsin small subunit 1                                                            | 682                        | 28298              | 5.05            | 27                           | 11                                       | 20                             | 14                                         | 11                                    | 4                              | 0.79               | 4.79  |
| ATP1E_HUMAN           | ATP synthase subunit beta, mitochondrial                                          | 681                        | 95525              | 5.26            | 59                           | 40                                       | 27                             | 22                                         | 8                                     | 0.78                           | 3.81               |       |
| CAVIN1_HUMAN          | Caveolin-associated protein 1                                                     | 670                        | 63450              | 5.51            | 26                           | 19                                       | 9                              | 5                                          | 9                                     | 0.32                           | 0.78               |       |
| ML125_HUMAN           | Myosin regulatory light chain 12B                                                 | 658                        | 19767              | 4.71            | 38                           | 11                                       | 27                             | 13                                         | 11                                    | 1                              | 0.84               | 11.19 |
| ML12A_HUMAN           | Myosin regulatory light chain 12A                                                 | 640                        | 19781              | 4.67            | 37                           | 27                                       | 13                             | 11                                         | 1                                     | 0.84                           | 11.19              |       |
| UGPA_HUMAN            | UDP-glucose-1-phosphate uridylyltransferase                                       | 630                        | 56905              | 8.16            | 44                           | 28                                       | 18                             | 15                                         | 4                                     | 0.6                            | 2                  |       |
| PLN2_HUMAN            | Parvalbumin-3                                                                     | 620                        | 47046              | 5.3             | 32                           | 23                                       | 16                             | 11                                         | 3                                     | 0.59                           | 1.85               |       |
| PTBP1_HUMAN           | Polypyrimidine tract-binding protein 1                                            | 620                        | 57186              | 5.22            | 25                           | 18                                       | 9                              | 7                                          | 9                                     | 0.32                           | 0.67               |       |
| PSMD1_HUMAN           | 26S proteasome non-ATPase regulatory subunit 1                                    | 611                        | 105769             | 5.25            | 33                           | 24                                       | 18                             | 14                                         | 18                                    | 0.34                           | 0.74               |       |
| MAP4_HUMAN            | Microtubule-associated protein 4                                                  | 611                        | 120930             | 5.32            | 66                           | 22                                       | 22                             | 10                                         | 22                                    | 0.36                           | 0.46               |       |
| TRIO_HUMAN            | Threosulin                                                                        | 649                        | 17350              | 4.82            | 39                           | 27                                       | 8                              | 5                                          | 8                                     | 0.78                           | 4.63               |       |
| CHN2_HUMAN            | Calnexin-2                                                                        | 640                        | 36391              | 5.89            | 50                           | 30                                       | 14                             | 8                                          | 13                                    | 0.51                           | 1.79               |       |
| CHN2_HUMAN            | Calnexin-2                                                                        | 640                        | 36376              | 5.95            | 44                           | 27                                       | 11                             | 9                                          | 10                                    | 0.6                            | 2.4                |       |
| IMB1_HUMAN            | Importin subunit beta-1                                                           | 631                        | 97108              | 4.88            | 48                           | 28                                       | 25                             | 18                                         | 25                                    | 0.52                           | 1.08               |       |
| IPO3_HUMAN            | Importin-5                                                                        | 616                        | 123550             | 4.83            | 60                           | 36                                       | 38                             | 26                                         | 38                                    | 0.55                           | 1.41               |       |
| TEN1_HUMAN            | Tenascin                                                                          | 611                        | 240700             | 4.79            | 45                           | 30                                       | 29                             | 18                                         | 29                                    | 0.59                           | 0.37               |       |
| TAGL2_HUMAN           | Transgelin-2                                                                      | 597                        | 22377              | 8.41            | 65                           | 30                                       | 15                             | 10                                         | 15                                    | 0.84                           | 8.94               |       |
| PRDX4_HUMAN           | Peroxisomal-4                                                                     | 589                        | 25019              | 6               | 38                           | 20                                       | 14                             | 8                                          | 14                                    | 0.76                           | 2.76               |       |
| COPR1_HUMAN           | Coatomer subunit beta                                                             | 583                        | 107074             | 5.72            | 33                           | 20                                       | 22                             | 14                                         | 22                                    | 0.38                           | 0.73               |       |
| SVYQ1_HUMAN           | Isochucine-irRNA ligase, cytosolic                                                | 578                        | 144406             | 5.82            | 53                           | 29                                       | 17                             | 28                                         | 28                                    | 0.37                           | 0.64               |       |
| SPTN1_HUMAN           | Spectrin alpha chain, non-erythrocytic 1                                          | 578                        | 294384             | 5.22            | 50                           | 17                                       | 29                             | 12                                         | 29                                    | 0.35                           | 0.19               |       |
| COPR1_HUMAN           | Coatomer subunit alpha                                                            | 571                        | 138258             | 7.7             | 40                           | 26                                       | 21                             | 15                                         | 21                                    | 0.26                           | 0.57               |       |
| PDIA4_HUMAN           | Protein disulfide-isomerase A6                                                    | 570                        | 48091              | 4.85            | 30                           | 21                                       | 11                             | 9                                          | 11                                    | 0.48                           | 1.59               |       |
| QBXL_HUMAN            | Quanine nucleotide-binding protein subunit beta-4                                 | 567                        | 17543              | 5.6             | 11                           | 5                                        | 7                              | 4                                          | 3                                     | 0.39                           | 0.66               |       |
| P4HA2_HUMAN           | Profilin 4-hydroxylase subunit alpha-2                                            | 560                        | 60864              | 5.49            | 44                           | 29                                       | 20                             | 12                                         | 20                                    | 0.47                           | 1.28               |       |
| SCG1A_HUMAN           | Protein transport protein SCG1A                                                   | 555                        | 123931             | 6.43            | 35                           | 19                                       | 19                             | 10                                         | 19                                    | 0.31                           | 0.37               |       |
| UGCG_HUMAN            | UDP-glucose 4-epimerase glucosyltransferase 1                                     | 550                        | 170703             | 5.92            | 41                           | 27                                       | 25                             | 17                                         | 25                                    | 0.37                           | 0.53               |       |
| PPR1_HUMAN            | Peptidyl-prolyl isomerase B                                                       | 545                        | 23728              | 9.42            | 60                           | 25                                       | 17                             | 6                                          | 17                                    | 0.64                           | 3.02               |       |
| PGAM1_HUMAN           | Phosphoglycerate mutase 1                                                         | 535                        | 28788              | 6.67            | 47                           | 28                                       | 11                             | 8                                          | 11                                    | 0.45                           | 3.22               |       |
| CLIC4_HUMAN           | Chloride intracellular channel protein 4                                          | 531                        | 28754              | 5.45            | 43                           | 25                                       | 14                             | 8                                          | 13                                    | 0.72                           | 2.66               |       |
| CORP2_HUMAN           | Coatomer subunit beta-2                                                           | 528                        | 102422             | 5.15            | 42                           | 26                                       | 24                             | 17                                         | 24                                    | 0.46                           | 1.08               |       |
| FRS1_HUMAN            | Peptidyl-prolyl isomerase FKBP10                                                  | 524                        | 64024              | 5.96            | 39                           | 23                                       | 20                             | 11                                         | 20                                    | 0.43                           | 1.05               |       |
| EFI1Q_HUMAN           | Elongation factor 1-gamma                                                         | 523                        | 50067              | 6.25            | 41                           | 24                                       | 19                             | 12                                         | 19                                    | 0.55                           | 1.95               |       |
| TOP2L_HUMAN           | T-complex protein 1 subunit epsilon                                               | 520                        | 59633              | 5.45            | 34                           | 25                                       | 16                             | 12                                         | 16                                    | 0.54                           | 1.86               |       |
| VAT1_HUMAN            | Synaptic vesicle membrane protein VAMP-1 homolog                                  | 510                        | 41953              | 5.88            | 36                           | 24                                       | 16                             | 10                                         | 16                                    | 0.59                           | 2.44               |       |
| VGLL1_HUMAN           | Vagin                                                                             | 500                        | 141368             | 6.43            | 44                           | 20                                       | 25                             | 13                                         | 3                                     | 0.32                           | 0.47               |       |
| GPPT1_HUMAN           | T-complex protein 1 subunit delta                                                 | 503                        | 60206              | 5.8             | 31                           | 19                                       | 19                             | 12                                         | 7                                     | 0.58                           | 1.29               |       |
| GPPT1_HUMAN           | Glutamine--fructose-5-phosphate aminotransferase [isomerizing] 1                  | 501                        | 78758              | 6.66            | 28                           | 18                                       | 22                             | 13                                         | 18                                    | 0.51                           | 0.89               |       |
| GPPT2_HUMAN           | Glutamine--fructose-5-phosphate aminotransferase [isomerizing] 2                  | 467                        | 76882              | 7.03            | 12                           | 5                                        | 9                              | 3                                          | 5                                     | 0.21                           | 0.18               |       |
| RSP1_HUMAN            | Ribosome-binding protein 1                                                        | 465                        | 152381             | 6.69            | 52                           | 24                                       | 20                             | 12                                         | 24                                    | 0.34                           | 0.26               |       |
| HSPB1_HUMAN           | Heat shock protein beta-1                                                         | 469                        | 22768              | 5.88            | 54                           | 38                                       | 13                             | 8                                          | 13                                    | 0.86                           | 8.57               |       |
| ZAKA_HUMAN            | Serine/threonine-protein phosphatase 2A 65 kDa regulatory subunit A alpha isoform | 467                        | 65267              | 5               | 23                           | 14                                       | 15                             | 10                                         | 15                                    | 0.42                           | 0.9                |       |
| MGM1_HUMAN            | Malic dehydrogenase, mitochondrial                                                | 466                        | 35481              | 8.92            | 31                           | 17                                       | 12                             | 7                                          | 12                                    | 0.48                           | 1.27               |       |
| VAT1_HUMAN            | V-type proton ATPase catalytic subunit A                                          | 465                        | 68260              | 5.35            | 35                           | 25                                       | 18                             | 12                                         | 18                                    | 0.46                           | 1.08               |       |
| GP2D_HUMAN            | Glucose-6-phosphate 1-dehydrogenase                                               | 464                        | 56219              | 6.29            | 26                           | 26                                       | 19                             | 12                                         | 18                                    | 0.57                           | 1.88               |       |
| PRDX2_HUMAN           | Peroxisomal-2, mitochondrial                                                      | 463                        | 22072              | 8.93            | 26                           | 16                                       | 10                             | 6                                          | 10                                    | 0.66                           | 2.67               |       |
| RPN2_HUMAN            | Dolichyl-diphosphoglycerate--protein glucosyltransferase subunit 2                | 463                        | 69241              | 5.44            | 30                           | 22                                       | 17                             | 14                                         | 17                                    | 0.55                           | 1.33               |       |
| PSMD2_HUMAN           | 26S proteasome non-ATPase regulatory subunit 2                                    | 475                        | 100126             | 5.66            | 37                           | 22                                       | 19                             | 12                                         | 19                                    | 0.41                           | 0.72               |       |
| SVOC_HUMAN            | Cysteine-irRNA ligase, cytosolic                                                  | 475                        | 85419              | 6.31            | 23                           | 13                                       | 15                             | 7                                          | 15                                    | 0.34                           | 0.41               |       |
| S10AB_HUMAN           | Protein S100-A11                                                                  | 473                        | 11733              | 6.96            | 42                           | 17                                       | 6                              | 5                                          | 6                                     | 0.74                           | 21.41              |       |
| PARK1_HUMAN           | Protein nuclear acid dehydrogenase DJ-1                                           | 468                        | 18878              | 6.33            | 32                           | 19                                       | 9                              | 6                                          | 9                                     | 0.72                           | 3.77               |       |
| PLDGG_HUMAN           | Protein kinase-2-oxoglutarate 5-dehydrogenase 3                                   | 467                        | 84731              | 5.89            | 28                           | 21                                       | 11                             | 9                                          | 11                                    | 0.26                           | 0.72               |       |
| PLDGG_HUMAN           | Protein kinase-2-oxoglutarate 5-dehydrogenase 2                                   | 468                        | 84632              | 6.24            | 31                           | 13                                       | 19                             | 9                                          | 19                                    | 0.36                           | 0.54               |       |
| PLDGG_HUMAN           | Protein kinase-2-oxoglutarate 5-dehydrogenase 1                                   | 467                        | 84497              | 6.47            | 26                           | 17                                       | 17                             | 9                                          | 17                                    | 0.35                           | 0.57               |       |
| HSP74_HUMAN           | Heat shock 70 kDa protein 4                                                       | 466                        | 94271              | 5.11            | 37                           | 24                                       | 23                             | 15                                         | 23                                    | 0.43                           | 0.95               |       |
| HSP105_HUMAN          | Heat shock protein 105 kDa                                                        | 466                        | 96004              | 5.28            | 16                           | 4                                        | 14                             | 3                                          | 14                                    | 0.25                           | 0.14               |       |
| UGDH_HUMAN            | UDP-glucose 6-dehydrogenase                                                       | 463                        | 54899              | 6.73            | 35                           | 26                                       | 19                             | 16                                         | 19                                    | 0.68                           | 2.37               |       |
| NEP_HUMAN             | Neprilysin                                                                        | 460                        | 85460              | 5.54            | 35                           | 18                                       | 21                             | 11                                         | 21                                    | 0.4                            | 0.71               |       |
| GPT1_HUMAN            | Glucose-6-phosphate isomerase                                                     | 447                        | 63107              | 6.43            | 30                           | 16                                       | 14                             | 8                                          | 14                                    | 0.44                           | 0.94               |       |
| STIP1_HUMAN           | Stress-induced-phosphoprotein 1                                                   | 446                        | 62598              | 6.4             | 22                           | 14                                       | 12                             | 7                                          | 12                                    | 0.33                           | 0.59               |       |
| NMT1_HUMAN            | Nucleoside 5-methyltransferase                                                    | 439                        | 28555              | 5.56            | 36                           | 17                                       | 11                             | 6                                          | 11                                    | 0.66                           | 1.32               |       |
| ADH2_HUMAN            | Alcohol dehydrogenase class-2                                                     | 438                        | 38986              | 7.45            | 18                           | 13                                       | 8                              | 5                                          | 8                                     | 0.39                           | 0.69               |       |
| BQCH1_HUMAN           | Transforming growth factor-beta-induced protein ig-h3                             | 437                        | 74634              | 7.62            | 26                           | 13                                       | 15                             | 7                                          | 15                                    | 0.37                           | 0.48               |       |
| CORP1_HUMAN           | Cysteine and glycine-rich protein 1                                               | 430                        | 29554              | 6.9             | 30                           | 19                                       | 9                              | 7                                          | 9                                     | 0.37                           | 2.07               |       |
| CALU_HUMAN            | Calnexin                                                                          | 428                        | 37084              | 4.47            | 50                           | 18                                       | 18                             | 9                                          | 18                                    | 0.52                           | 1.74               |       |
| HRP23_HUMAN           | Heterogeneous nuclear ribonucleoprotein U                                         | 428                        | 95228              | 5.76            | 29                           | 19                                       | 16                             | 10                                         | 16                                    | 0.34                           | 0.66               |       |
| PSBB_HUMAN            | Proteasome subunit beta type-5                                                    | 423                        | 28462              | 6.43            | 15                           | 12                                       | 6                              | 5                                          | 6                                     | 0.38                           | 1.07               |       |
| TOP2L_HUMAN           | T-complex protein 1 subunit gamma                                                 | 422                        | 60495              | 6.3             | 28                           | 13                                       | 15                             | 8                                          | 15                                    | 0.42                           | 0.74               |       |
| GPPIIP_HUMAN          | Glucose-6-phosphate dehydrogenase                                                 | 420                        | 35846              | 7.01            | 9                            | 7                                        | 4                              | 3                                          | 4                                     | 0.28                           | 0.42               |       |
| AT2_HUMAN             | AT2 cell surface antigen heavy chain                                              | 417                        | 67952              | 4.89            | 25                           | 16                                       | 15                             | 10                                         | 15                                    | 0.37                           | 0.85               |       |
| OST4L_HUMAN           | Dolichyl-diphosphoglycerate--protein glucosyltransferase 48 kDa subunit           | 416                        | 50769              | 6.09            | 19                           | 13                                       | 9                              | 6                                          | 9                                     | 0.4                            | 0.78               |       |
| DREL1_HUMAN           | Drelin                                                                            | 415                        | 71285              | 4.41            | 19                           | 15                                       | 15                             | 9                                          | 15                                    | 0.29                           | 0.51               |       |
| AP1B1_HUMAN           | AP-1 complex subunit beta-1                                                       | 230                        | 104570             | 4.94            | 22                           | 8                                        | 16                             | 7                                          | 11                                    | 0.28                           | 0.32               |       |
| PGCRL_HUMAN           | Programmed cell death 6-interacting protein                                       | 405                        | 95963              | 6.13            | 32                           | 18                                       | 19                             | 10                                         | 8                                     | 0.36                           | 0.89               |       |
| PCN1_HUMAN            | Profilin 2-hydroxylase 1                                                          | 405                        | 83341              | 5.05            | 34                           | 17                                       | 18                             | 9                                          | 18                                    | 0.45                           | 0.65               |       |
| TMED4_HUMAN           | Transmembrane emp24 domain-containing protein 10                                  | 404                        | 24860              | 6.97            | 14                           | 9                                        | 6                              | 4                                          | 6                                     | 0.38                           | 0.94               |       |
| SVLQ_HUMAN            | Serpin-irRNA ligase, cytosolic                                                    | 403                        | 58740              | 6.25            | 27                           | 16                                       | 16                             | 7                                          | 16                                    | 0.42                           | 0.64               |       |
| CALX_HUMAN            | Calnexin                                                                          | 403                        | 67526              | 4.47            | 33                           | 19                                       | 13                             | 8                                          | 13                                    | 0.32                           | 0.87               |       |
| COS1A1_HUMAN          | Collagen alpha-1(V) chain                                                         | 403                        | 183447             | 4.94            | 18                           | 13                                       | 12                             | 8                                          | 12                                    | 0.14                           | 0.2                |       |
| NBL1_HUMAN            | Nbl-1-like protein 1                                                              | 402                        | 84085              | 5.22            | 24                           | 22                                       | 15                             | 13                                         | 15                                    | 0.32                           | 0.91               |       |
| AT1A2_HUMAN           | Adiponectin-2                                                                     | 401                        | 65503              | 5.43            | 32                           | 10                                       | 19                             | 15                                         | 10                                    | 0.51                           | 1.14               |       |
| GCN1_HUMAN            | eIF-2-alpha kinase activator GCN1                                                 | 399                        | 292372             | 7.29            | 40                           | 22                                       | 22                             | 14                                         | 22                                    | 0.15                           | 0.22               |       |
| CLIC7_HUMAN           | Chloride intracellular channel protein 1                                          | 399                        | 26906              | 5.09            | 44                           | 22                                       | 14                             | 9                                          | 13                                    | 0.69                           | 3                  |       |
| TL1B1_HUMAN           | Tax1-binding protein 3                                                            | 398                        | 13728              | 8.04            | 13                           | 11                                       | 5                              | 4                                          | 5                                     | 0.85                           | 2.28               |       |
| PLS1_HUMAN            | Plasmin-3                                                                         | 395                        | 70766              | 5.41            | 45                           | 24                                       | 29                             | 20                                         | 5                                     | 0.63                           | 2.25               |       |
| FEN1L_HUMAN           | Fen1-like family homolog 2                                                        | 393                        | 77811              | 6.26            | 26                           | 19                                       | 15                             | 10                                         | 15                                    | 0.39                           | 1.01               |       |
| NBSR1_HUMAN           | NADH-cytochrome b5 reductase 3                                                    | 389                        | 34213              | 7.18            | 24                           | 14                                       | 13                             | 8                                          | 13                                    | 0.62                           | 1.64               |       |
| IDH2_HUMAN            | Isocitrate dehydrogenase (NADP) cytosolic                                         | 387                        | 46630              | 6.53            | 34                           | 21                                       | 16                             | 9                                          | 16                                    | 0.56                           | 1.44               |       |
| ARF1_HUMAN            | ADP-ribosylation factor 4                                                         | 384                        | 25498              | 6.59            | 33                           | 15                                       | 13                             | 7                                          | 9                                     | 0.63                           | 3.07               |       |
| PPCE_HUMAN            | Profilin endoprotease                                                             | 380                        | 86648              | 5.53            | 18                           | 11                                       | 12                             | 7                                          | 12                                    | 0.33                           | 0.44               |       |
| TOP2L_HUMAN           | T-complex protein 1 subunit delta                                                 | 377                        | 57888              | 7.06            | 32                           | 20                                       | 19                             | 13                                         | 19                                    | 0.58                           | 1.55               |       |
| ITAV_HUMAN            | Integrin alpha-V                                                                  | 375                        | 115984             | 5.45            | 29                           | 18                                       | 18                             | 12                                         | 18                                    | 0.3                            | 0.54               |       |
| SPTB1_HUMAN           | Spectrin-beta chain, non-erythrocytic 1                                           | 372                        | 274439             | 5.39            | 34                           | 13                                       | 22                             | 9                                          | 22                                    | 0.17                           | 0.17               |       |

<sup>a</sup>Protein score is calculated from the score of the peptide attributed to the protein.

<sup>b</sup>pI is (Predicted) isoelectric point.

<sup>c</sup>Number of matches is spectrum number matched to protein<sup>10</sup>.

<sup>d</sup>Number of significant matches is spectrum number that matches protein and exceeds the identification criteria.

<sup>e</sup>Number of sequences is number of peptides matched to protein<sup>10</sup>.

<sup>f</sup>Number of significant sequences is number of peptides exceeding the identification criteria matched to proteins.

<sup>g</sup>Number of unique sequences is a unique<sup>10</sup> number of peptides matched to proteins.

<sup>h</sup>Sequence coverage is the ratio of the total number of matched peptide residues to the total length of the protein.

<sup>i</sup>Exponentially Modified Protein Abundance Index ([http://www.matrixscience.com/help/quant\\_help.html](http://www.matrixscience.com/help/quant_help.html)).

Table S2, Cont.2.

| UniProt/Swiss-Prot ID | Description                                              | Protein score <sup>1</sup> | Protein mass (kDa) | pI <sup>2</sup> | Num. of matches <sup>3</sup> | Num. of significant matches <sup>4</sup> | Num. of sequences <sup>5</sup> | Num. of significant sequences <sup>6</sup> | Num. of unique sequences <sup>7</sup> | Sequence coverage <sup>8</sup> | empAI <sup>9</sup> |
|-----------------------|----------------------------------------------------------|----------------------------|--------------------|-----------------|------------------------------|------------------------------------------|--------------------------------|--------------------------------------------|---------------------------------------|--------------------------------|--------------------|
| PF22L_HUMAN           | Phosphoglucomutase, debranching                          | 271                        | 53.08              | 6.8             | 20                           | 16                                       | 11                             | 8                                          | 11                                    | 0.38                           | 0.97               |
| APF1A_HUMAN           | AP-1 complex subunit delta-2                             | 270                        | 107476             | 6.53            | 37                           | 19                                       | 23                             | 12                                         | 18                                    | 0.39                           | 0.6                |
| APF2A_HUMAN           | AP-2 complex subunit alpha-2                             | 207                        | 103885             | 6.53            | 21                           | 8                                        | 13                             | 5                                          | 8                                     | 0.24                           | 0.22               |
| OAT2_HUMAN            | Omitron 2                                                | 270                        | 43504              | 6.57            | 16                           | 12                                       | 8                              | 5                                          | 8                                     | 0.32                           | 1.21               |
| MMPI4_HUMAN           | Matrix metalloproteinase-14                              | 367                        | 65852              | 7.63            | 38                           | 12                                       | 10                             | 5                                          | 10                                    | 0.2                            | 0.37               |
| HNRPF_HUMAN           | Heterogeneous nuclear ribonucleoprotein F                | 366                        | 45643              | 5.38            | 16                           | 12                                       | 6                              | 5                                          | 4                                     | 0.3                            | 0.73               |
| HNRH1_HUMAN           | Heterogeneous nuclear ribonucleoprotein H                | 208                        | 49198              | 5.85            | 18                           | 9                                        | 10                             | 7                                          | 6                                     | 0.28                           | 0.61               |
| HNRH2_HUMAN           | Heterogeneous nuclear ribonucleoprotein H2               | 116                        | 49232              | 5.89            | 11                           | 6                                        | 9                              | 6                                          | 8                                     | 0.38                           | 0.66               |
| AAT1_HUMAN            | Aspartate aminotransferase, cytoplasmic                  | 266                        | 46219              | 6.52            | 22                           | 12                                       | 12                             | 7                                          | 12                                    | 0.53                           | 0.88               |
| DPE1_HUMAN            | Dipeptidyl peptidase 4                                   | 365                        | 80222              | 5.67            | 19                           | 13                                       | 9                              | 5                                          | 9                                     | 0.19                           | 0.27               |
| LAMC1_HUMAN           | Laminin subunit gamma-1                                  | 363                        | 177489             | 5.01            | 22                           | 11                                       | 15                             | 15                                         | 15                                    | 0.18                           | 0.3                |
| PGC4_HUMAN            | Phosphatidylcholine-binding domain assembly protein      | 359                        | 70710              | 7.7             | 16                           | 11                                       | 8                              | 6                                          | 8                                     | 0.24                           | 0.51               |
| SER2_HUMAN            | Phosphoserine aminotransferase                           | 357                        | 40397              | 7.56            | 37                           | 18                                       | 17                             | 10                                         | 17                                    | 0.87                           | 1.8                |
| MDH2_HUMAN            | Malate dehydrogenase, cytoplasmic                        | 354                        | 38403              | 6.91            | 21                           | 13                                       | 9                              | 5                                          | 9                                     | 0.55                           | 0.77               |
| LRSD1_HUMAN           | Leucine-rich repeat-containing protein 58                | 353                        | 36806              | 6.61            | 23                           | 15                                       | 11                             | 6                                          | 11                                    | 0.28                           | 1.04               |
| ERP29_HUMAN           | Endoplasmic reticulum resident protein 29                | 350                        | 28975              | 6.77            | 18                           | 12                                       | 8                              | 7                                          | 8                                     | 0.45                           | 1.72               |
| COPEL_HUMAN           | Coatomer subunit epsilon                                 | 249                        | 34460              | 4.97            | 18                           | 15                                       | 8                              | 7                                          | 8                                     | 0.44                           | 1.23               |
| RL3_HUMAN             | RES domain protein L3                                    | 243                        | 34341              | 9.73            | 19                           | 10                                       | 8                              | 4                                          | 8                                     | 0.4                            | 0.82               |
| VATB2_HUMAN           | V-type proton ATPase subunit B, brain isoform            | 242                        | 56465              | 5.57            | 25                           | 16                                       | 11                             | 9                                          | 11                                    | 0.41                           | 0.94               |
| RC3H3_HUMAN           | Retinoid-binding-3                                       | 239                        | 37470              | 4.14            | 16                           | 10                                       | 6                              | 5                                          | 2                                     | 0.35                           | 0.94               |
| FKBP9_HUMAN           | Peptidyl-prolyl isomerase FKBP9                          | 239                        | 63044              | 4.91            | 20                           | 15                                       | 8                              | 6                                          | 8                                     | 0.22                           | 0.59               |
| YBX1_HUMAN            | Y-box-binding protein 3                                  | 278                        | 40066              | 9.77            | 11                           | 6                                        | 5                              | 2                                          | 3                                     | 0.23                           | 0.23               |
| DDX1_HUMAN            | ATP-dependent RNA helicase DDX1                          | 335                        | 82360              | 6.81            | 23                           | 13                                       | 14                             | 7                                          | 14                                    | 0.32                           | 0.43               |
| AGM1_HUMAN            | Phosphatidylcholine mutase                               | 335                        | 59814              | 5.84            | 19                           | 12                                       | 13                             | 8                                          | 13                                    | 0.4                            | 0.75               |
| LPFRP_HUMAN           | Leucine-rich PPR motif-containing protein, mitochondrial | 333                        | 157805             | 5.81            | 25                           | 14                                       | 16                             | 8                                          | 16                                    | 0.22                           | 0.24               |
| PRDX4_HUMAN           | Peroxiredoxin-4                                          | 277                        | 30321              | 5.86            | 38                           | 22                                       | 15                             | 10                                         | 13                                    | 0.7                            | 2.89               |
| PRDX1_HUMAN           | Peroxiredoxin-1                                          | 229                        | 22098              | 8.27            | 53                           | 22                                       | 20                             | 11                                         | 17                                    | 0.88                           | 6.8                |
| PRDX2_HUMAN           | Peroxiredoxin-2                                          | 165                        | 21878              | 5.66            | 16                           | 8                                        | 7                              | 5                                          | 6                                     | 0.44                           | 1.57               |
| ESTL2_HUMAN           | S-60methylthione hydrolase                               | 324                        | 31442              | 6.54            | 16                           | 11                                       | 9                              | 6                                          | 9                                     | 0.57                           | 1.21               |
| PALLD_HUMAN           | Palladin                                                 | 322                        | 150470             | 6.67            | 36                           | 17                                       | 20                             | 9                                          | 20                                    | 0.24                           | 0.28               |
| PI3KB_HUMAN           | Phosphoinositide 3-kinase, brain form                    | 322                        | 94635              | 6.4             | 26                           | 14                                       | 19                             | 10                                         | 15                                    | 0.33                           | 0.64               |
| PYLGL_HUMAN           | Glycogen phosphorylase, liver form                       | 308                        | 97087              | 5.71            | 10                           | 3                                        | 7                              | 3                                          | 3                                     | 0.14                           | 0.14               |
| IFTA_HUMAN            | Eukaryotic translation initiation factor 2, subunit 1    | 321                        | 36089              | 6.02            | 20                           | 15                                       | 10                             | 7                                          | 10                                    | 0.47                           | 1.24               |
| QSOX1_HUMAN           | QSOX superfamily protein 1                               | 321                        | 134464             | 6.52            | 38                           | 12                                       | 18                             | 6                                          | 18                                    | 0.28                           | 0.21               |
| DDX3X_HUMAN           | ATP-dependent RNA helicase DDX3X                         | 319                        | 73198              | 6.73            | 15                           | 11                                       | 10                             | 7                                          | 10                                    | 0.25                           | 0.49               |
| IPOT1_HUMAN           | Importin-7                                               | 318                        | 118440             | 4.7             | 26                           | 14                                       | 13                             | 8                                          | 13                                    | 0.23                           | 0.29               |
| NUX2_HUMAN            | Nucleolin                                                | 318                        | 78588              | 4.8             | 23                           | 13                                       | 11                             | 6                                          | 11                                    | 0.21                           | 0.39               |
| ITB1_HUMAN            | Integrin beta-5                                          | 316                        | 88357              | 5.27            | 41                           | 19                                       | 21                             | 10                                         | 18                                    | 0.45                           | 0.88               |
| SYT1C_HUMAN           | SNARE-binding RNA ligase                                 | 316                        | 140387             | 7.53            | 19                           | 14                                       | 12                             | 6                                          | 12                                    | 0.6                            | 1.2                |
| CATB1_HUMAN           | Oathesin-B                                               | 314                        | 37797              | 5.88            | 33                           | 12                                       | 21                             | 7                                          | 12                                    | 0.42                           | 1.41               |
| RTN1_HUMAN            | Reticulon-1                                              | 312                        | 129851             | 4.43            | 19                           | 10                                       | 7                              | 4                                          | 7                                     | 0.14                           | 0.17               |
| SYT1C_HUMAN           | Arginine-ADNA ligase, cytoplasmic                        | 305                        | 75331              | 6.26            | 24                           | 11                                       | 17                             | 6                                          | 17                                    | 0.25                           | 0.56               |
| SAP1_HUMAN            | Proteasome                                               | 304                        | 58074              | 5.06            | 46                           | 17                                       | 17                             | 7                                          | 17                                    | 0.5                            | 0.81               |
| FLK2_HUMAN            | Four and a half LIM domain protein 2                     | 304                        | 32171              | 5.8             | 20                           | 9                                        | 12                             | 5                                          | 12                                    | 0.6                            | 0.8                |
| FBN1_HUMAN            | Fibrillin-1                                              | 267                        | 77162              | 5.07            | 23                           | 6                                        | 12                             | 3                                          | 7                                     | 0.19                           | 0.24               |
| DNCE2_HUMAN           | Dynactin subunit 2                                       | 304                        | 44204              | 5.1             | 9                            | 8                                        | 4                              | 4                                          | 4                                     | 0.15                           | 0.46               |
| ANKK4_HUMAN           | Annexin A4                                               | 298                        | 35860              | 5.84            | 20                           | 13                                       | 11                             | 5                                          | 7                                     | 0.36                           | 0.7                |
| COMT_HUMAN            | Catechol O-methyltransferase                             | 302                        | 30018              | 5.26            | 20                           | 13                                       | 10                             | 6                                          | 10                                    | 0.53                           | 1.29               |
| NOMD1_HUMAN           | Nodal modulator 1                                        | 302                        | 134239             | 5.54            | 20                           | 11                                       | 16                             | 8                                          | 16                                    | 0.27                           | 0.28               |
| ECNM_HUMAN            | Enoyl-CoA hydratase, mitochondrial                       | 302                        | 31387              | 6.34            | 11                           | 9                                        | 7                              | 6                                          | 7                                     | 0.42                           | 1.21               |
| EHOD_HUMAN            | EH domain-containing protein-2                           | 301                        | 61123              | 6.03            | 22                           | 14                                       | 14                             | 10                                         | 14                                    | 0.38                           | 0.98               |
| IPYF_HUMAN            | Isoarginine synthetase                                   | 301                        | 35629              | 5.54            | 21                           | 11                                       | 11                             | 6                                          | 11                                    | 0.54                           | 1.14               |
| MYOTC_HUMAN           | Unconventional myosin-c                                  | 300                        | 121606             | 9.46            | 29                           | 12                                       | 20                             | 9                                          | 20                                    | 0.3                            | 0.36               |
| TOPC1_HUMAN           | T-complex protein 1 subunit theta                        | 299                        | 59583              | 5.42            | 38                           | 17                                       | 20                             | 10                                         | 20                                    | 0.46                           | 1.01               |
| IMA1_HUMAN            | Importin subunit delta-1                                 | 298                        | 59591              | 4.85            | 13                           | 7                                        | 11                             | 5                                          | 6                                     | 0.28                           | 0.42               |
| PURH_HUMAN            | Bifunctional purine biosynthesis protein PURH            | 287                        | 64575              | 6.27            | 25                           | 15                                       | 14                             | 10                                         | 14                                    | 0.45                           | 0.91               |
| FKL1_HUMAN            | Four and a half LIM domain protein 1                     | 293                        | 36239              | 9.25            | 17                           | 12                                       | 7                              | 6                                          | 7                                     | 0.32                           | 0.99               |
| RL2_HUMAN             | RES domain protein L2                                    | 294                        | 21850              | 9.86            | 26                           | 17                                       | 8                              | 6                                          | 8                                     | 0.62                           | 2.75               |
| LIMA1_HUMAN           | LIM domain and actin-binding protein 1                   | 293                        | 85173              | 6.41            | 19                           | 9                                        | 11                             | 5                                          | 11                                    | 0.19                           | 0.28               |
| AMPL_HUMAN            | Cytosolic aminopeptidase                                 | 293                        | 85131              | 6.03            | 19                           | 8                                        | 11                             | 5                                          | 11                                    | 0.33                           | 0.45               |
| ALTAT1_HUMAN          | Alpha-aminoadipic semialdehyde dehydrogenase             | 292                        | 58450              | 8.21            | 15                           | 10                                       | 10                             | 7                                          | 10                                    | 0.35                           | 0.85               |
| TNMD3_HUMAN           | Thrombospondin domain-containing protein 5               | 292                        | 47599              | 5.63            | 40                           | 17                                       | 13                             | 9                                          | 13                                    | 0.43                           | 1.2                |
| TNRC1_HUMAN           | Tumor necrosis factor receptor-associated protein 1      | 292                        | 41324              | 6.47            | 13                           | 10                                       | 8                              | 6                                          | 8                                     | 0.51                           | 1.24               |
| STRAP_HUMAN           | Serine-threonine kinase receptor-associated protein      | 289                        | 38414              | 4.98            | 17                           | 11                                       | 10                             | 5                                          | 10                                    | 0.53                           | 0.72               |
| P85B_HUMAN            | Proteinase subunit beta type-4                           | 288                        | 29185              | 5.72            | 11                           | 7                                        | 6                              | 7                                          | 7                                     | 0.47                           | 1.34               |
| DDX3_HUMAN            | ATP-dependent RNA helicase A                             | 283                        | 140869             | 6.41            | 17                           | 10                                       | 8                              | 3                                          | 8                                     | 0.14                           | 0.09               |
| ALL1L_HUMAN           | Mitochondrial 10-formyltetrahydrofolate dehydrogenase    | 281                        | 101881             | 6.13            | 33                           | 18                                       | 21                             | 12                                         | 21                                    | 0.37                           | 0.64               |
| GLSK_HUMAN            | Glyoxalase II, cytosolic                                 | 280                        | 72414              | 7.85            | 29                           | 10                                       | 14                             | 5                                          | 14                                    | 0.32                           | 0.33               |
| APT1_HUMAN            | Adenosine phosphoribosyltransferase                      | 279                        | 19595              | 5.78            | 7                            | 5                                        | 4                              | 4                                          | 4                                     | 0.53                           | 1.31               |
| SOCS1_HUMAN           | Son-of-cells-1                                           | 279                        | 32424              | 7.05            | 16                           | 13                                       | 5                              | 5                                          | 5                                     | 0.39                           | 1.16               |
| SCRN1_HUMAN           | Secernin-1                                               | 274                        | 46353              | 4.68            | 19                           | 11                                       | 8                              | 6                                          | 8                                     | 0.37                           | 0.43               |
| USO1_HUMAN            | General vesicular transport factor p115                  | 274                        | 107828             | 4.85            | 28                           | 19                                       | 13                             | 10                                         | 13                                    | 0.23                           | 0.47               |
| ECHE_HUMAN            | Trifunctional enzyme subunit beta, mitochondrial         | 273                        | 51262              | 9.45            | 14                           | 10                                       | 6                              | 4                                          | 6                                     | 0.23                           | 0.38               |
| EDT1_HUMAN            | Extended synaptotagmin-1                                 | 272                        | 127180             | 5.57            | 23                           | 14                                       | 10                             | 6                                          | 10                                    | 0.18                           | 0.23               |
| ASNS_HUMAN            | Asparagine synthetase [aspartate-hydrolyzing]            | 271                        | 64329              | 6.39            | 28                           | 12                                       | 8                              | 7                                          | 8                                     | 0.51                           | 0.88               |
| IPYF_HUMAN            | Isoarginine synthetase                                   | 270                        | 68527              | 5.96            | 46                           | 25                                       | 12                             | 6                                          | 12                                    | 0.5                            | 1.85               |
| RD3B2_HUMAN           | UV excision repair protein RAD32 homolog B               | 270                        | 43145              | 4.79            | 12                           | 11                                       | 6                              | 5                                          | 6                                     | 0.31                           | 0.78               |
| COR6A2_HUMAN          | Collagen alpha-2(VI) chain                               | 269                        | 108512             | 5.85            | 22                           | 15                                       | 13                             | 9                                          | 13                                    | 0.25                           | 0.47               |
| ORP5L_HUMAN           | Optic atrophy 5, leucine-specific phosphatase            | 268                        | 52645              | 5.66            | 16                           | 10                                       | 11                             | 6                                          | 11                                    | 0.43                           | 0.61               |
| MRC2_HUMAN            | O-type mannose receptor 2                                | 267                        | 166368             | 5.54            | 26                           | 15                                       | 15                             | 9                                          | 15                                    | 0.23                           | 0.25               |
| XRCO2_HUMAN           | X-ray repair cross-complementing protein 5               | 266                        | 85652              | 5.95            | 27                           | 16                                       | 18                             | 11                                         | 18                                    | 0.45                           | 0.74               |
| RAB21_HUMAN           | Ras-related protein RAB21                                | 266                        | 26643              | 6.22            | 9                            | 7                                        | 4                              | 3                                          | 4                                     | 0.36                           | 0.59               |
| NXP2_HUMAN            | Protein NXP2                                             | 266                        | 60704              | 4.61            | 12                           | 9                                        | 9                              | 6                                          | 9                                     | 0.26                           | 0.51               |
| IPYF_HUMAN            | Eukaryotic translation initiation factor 2A-2            | 265                        | 18782              | 5.38            | 10                           | 9                                        | 6                              | 4                                          | 6                                     | 0.42                           | 2.35               |
| TMX3_HUMAN            | Protein disulfide-isomerase TMX3                         | 265                        | 51839              | 4.8             | 11                           | 6                                        | 8                              | 4                                          | 8                                     | 0.25                           | 0.38               |
| EF1B_HUMAN            | Elongation factor 1-beta                                 | 263                        | 24748              | 4.5             | 24                           | 13                                       | 9                              | 8                                          | 8                                     | 0.59                           | 3.5                |
| EF1D_HUMAN            | Elongation factor 1-delta                                | 151                        | 31103              | 4.8             | 19                           | 9                                        | 10                             | 7                                          | 9                                     | 0.52                           | 1.54               |
| BASP1_HUMAN           | Brain acid soluble protein 1                             | 262                        | 22680              | 4.64            | 41                           | 15                                       | 7                              | 5                                          | 7                                     | 0.54                           | 1.99               |
| P85B_HUMAN            | Proteinase subunit beta type-6                           | 261                        | 25341              | 4.8             | 7                            | 6                                        | 3                              | 3                                          | 3                                     | 0.33                           | 0.63               |
| P85B_HUMAN            | Proteinase activator complex subunit 2                   | 261                        | 27384              | 5.54            | 7                            | 5                                        | 5                              | 3                                          | 5                                     | 0.36                           | 0.57               |
| CANV_HUMAN            | Calnexin catalytic subunit                               | 260                        | 81838              | 5.49            | 21                           | 14                                       | 16                             | 10                                         | 16                                    | 0.42                           | 0.67               |
| NDKA_HUMAN            | Nucleoside diphosphate kinase B                          | 259                        | 17267              | 6.52            | 34                           | 10                                       | 9                              | 4                                          | 9                                     | 0.72                           | 3.15               |
| NDKA_HUMAN            | Nucleoside diphosphate kinase A                          | 90                         | 17138              | 5.83            | 31                           | 9                                        | 11                             | 5                                          | 7                                     | 0.88                           | 3.23               |
| PSMD3_HUMAN           | 26S proteasome non-ATPase regulatory subunit 3           | 259                        | 68939              | 8.47            | 19                           | 14                                       | 10                             | 7                                          | 10                                    | 0.23                           | 0.61               |
| ARHGAP1_HUMAN         | Actin-related protein 2/3 complex subunit 1B             | 258                        | 49923              | 6.69            | 25                           | 13                                       | 6                              | 4                                          | 6                                     | 0.41                           | 1.04               |
| ANX11_HUMAN           | Annexin A11                                              | 255                        | 54355              | 7.53            | 12                           | 9                                        | 6                              | 3                                          | 6                                     | 0.17                           | 0.26               |
| ITAH_HUMAN            | Integrin alpha-5                                         | 255                        | 114465             | 5.5             | 15                           | 10                                       | 9                              | 7                                          | 9                                     | 0.2                            | 0.29               |
| OSR1_HUMAN            | Carbamoyl reductase (NADPH) 3                            | 135                        | 38931              | 5.82            | 11                           | 7                                        | 5                              | 3                                          | 2                                     | 0.27                           | 0.5                |
| ITB1_HUMAN            | Integrin beta-5                                          | 248                        | 87998              | 5.72            | 13                           | 11                                       | 10                             | 8                                          | 10                                    | 0.29                           | 0.46               |
| SCOR1_HUMAN           | Lysosome membrane protein 2                              | 245                        | 54755              | 5               | 21                           | 11                                       | 10                             | 4                                          | 10                                    | 0.55                           | 0.98               |

<sup>1</sup>Protein score is calculated from the score of the peptide attributed to the protein.

<sup>2</sup>pI is (Predicted) isoelectric point.

<sup>3</sup>Number of matches is spectrum number matched to protein<sup>1</sup>.

<sup>4</sup>Number of significant matches is spectrum number that matches protein and exceeds the identification criteria.

<sup>5</sup>Number of sequences is number of peptides matched to protein<sup>2</sup>.

<sup>6</sup>Number of significant sequences is number of peptides exceeding the identification criteria matched to proteins.

<sup>7</sup>Number of unique sequences is a unique<sup>3</sup> number of peptides matched to proteins.

<sup>8</sup>Sequence coverage is the ratio of the total number of matched peptide residues to the total length of the protein.

<sup>9</sup>Exponentially Modified Protein Abundance Index ([http://www.matrixscience.com/help/quant\\_empai\\_help.html](http://www.matrixscience.com/help/quant_empai_help.html)).

Table S2, Cont.3.

| UniProt/Swiss-Prot ID | Description                                                                | Protein score <sup>a</sup> | Protein mass (kDa) | pI <sup>b</sup> | Num. of matches <sup>c</sup> | Num. of significant matches <sup>d</sup> | Num. of sequences <sup>e</sup> | Num. of significant sequences <sup>f</sup> | Num. of unique sequences <sup>g</sup> | Sequence coverage <sup>h</sup> | emPAI |
|-----------------------|----------------------------------------------------------------------------|----------------------------|--------------------|-----------------|------------------------------|------------------------------------------|--------------------------------|--------------------------------------------|---------------------------------------|--------------------------------|-------|
| PF3B2_HUMAN           | Lysosomal protease protein                                                 | 244                        | 54431              | 6.18            | 8                            | 8                                        | 5                              | 5                                          | 5                                     | 0.17                           | 0.26  |
| C10B7_HUMAN           | Complement component 1 G subcomponent-binding protein, mitochondrial       | 243                        | 31343              | 4.74            | 15                           | 9                                        | 7                              | 7                                          | 7                                     | 0.47                           | 0.74  |
| HN1T1_HUMAN           | Histidine triad nucleotide-binding protein 1                               | 242                        | 13793              | 6.43            | 13                           | 9                                        | 4                              | 3                                          | 4                                     | 0.47                           | 2.28  |
| EHD1_HUMAN            | EH domain-containing protein 1                                             | 242                        | 60559              | 6.35            | 19                           | 9                                        | 10                             | 5                                          | 10                                    | 0.33                           | 0.23  |
| PQM1_HUMAN            | Phosphoglucomutase-1                                                       | 241                        | 61411              | 6.3             | 17                           | 11                                       | 13                             | 9                                          | 13                                    | 0.37                           | 0.84  |
| SRCO2_HUMAN           | Src substrate cortactin                                                    | 240                        | 61549              | 5.24            | 13                           | 8                                        | 9                              | 5                                          | 9                                     | 0.22                           | 0.4   |
| PAT1_HUMAN            | Flavinogen activator inhibitor 1                                           | 240                        | 45031              | 6.68            | 12                           | 8                                        | 6                              | 6                                          | 6                                     | 0.36                           | 0.91  |
| NP1L1_HUMAN           | Nucleosome assembly inhibitor 1-like 1                                     | 240                        | 45346              | 4.36            | 18                           | 11                                       | 8                              | 6                                          | 7                                     | 0.47                           | 0.73  |
| CAPD2_HUMAN           | Macrophage-capase protein                                                  | 239                        | 38474              | 5.82            | 23                           | 14                                       | 9                              | 6                                          | 9                                     | 0.45                           | 1.13  |
| ASPC2_HUMAN           | Actinin-related protein 2/3 complex subunit 5                              | 231                        | 55770              | 6.44            | 12                           | 8                                        | 5                              | 3                                          | 5                                     | 0.25                           | 0.65  |
| NACAM2_HUMAN          | Nascent polypeptide-associated complex subunit alpha, muscle-specific form | 238                        | 205295             | 9.6             | 13                           | 8                                        | 7                              | 5                                          | 7                                     | 0.04                           | 0.11  |
| NACAM1_HUMAN          | Nascent polypeptide-associated complex subunit alpha                       | 109                        | 23209              | 4.68            | 3                            | 2                                        | 1                              | 1                                          | 1                                     | 0.07                           | 0.19  |
| LKHA4_HUMAN           | Leukotriene A-4 hydrolase                                                  | 237                        | 69241              | 5.8             | 16                           | 11                                       | 6                              | 6                                          | 6                                     | 0.16                           | 0.44  |
| BCW1_HUMAN            | Basic leucine zipper and WZ domain-containing protein 1                    | 236                        | 48013              | 5.75            | 13                           | 8                                        | 9                              | 5                                          | 8                                     | 0.35                           | 0.54  |
| PATD4_HUMAN           | Profilin-like-associated protein 2d4                                       | 236                        | 42759              | 6.12            | 11                           | 5                                        | 6                              | 3                                          | 6                                     | 0.32                           | 0.33  |
| DHE12_HUMAN           | Very-long-chain 3-oxoacyl-CoA reductase                                    | 233                        | 34302              | 9.24            | 12                           | 7                                        | 6                              | 4                                          | 6                                     | 0.38                           | 0.62  |
| GBH2_HUMAN            | Glutathione synthetase                                                     | 232                        | 52332              | 5.87            | 10                           | 8                                        | 5                              | 4                                          | 5                                     | 0.37                           | 0.37  |
| MDH2_HUMAN            | Malate+2-oxoglutarate dehydrogenase 2                                      | 231                        | 55770              | 6.44            | 12                           | 6                                        | 5                              | 3                                          | 5                                     | 0.21                           | 0.25  |
| ASS2_HUMAN            | Argininosuccinate synthase                                                 | 230                        | 46001              | 8.08            | 15                           | 12                                       | 8                              | 7                                          | 8                                     | 0.4                            | 1.05  |
| MKI1_HUMAN            | Mitogen-activated protein kinase 1                                         | 230                        | 41363              | 6.5             | 14                           | 9                                        | 6                              | 10                                         | 7                                     | 0.51                           | 1.02  |
| MKI2_HUMAN            | Mitogen-activated protein kinase 3                                         | 91                         | 43108              | 6.28            | 10                           | 2                                        | 7                              | 2                                          | 3                                     | 0.3                            | 0.21  |
| SEC12_HUMAN           | Protein SEC13 homolog                                                      | 230                        | 35518              | 5.22            | 20                           | 10                                       | 6                              | 4                                          | 6                                     | 0.23                           | 0.79  |
| RISD1_HUMAN           | Rho GTPase-activating protein 1                                            | 229                        | 50404              | 5.85            | 32                           | 11                                       | 14                             | 6                                          | 14                                    | 0.44                           | 0.64  |
| UCHE1_HUMAN           | Ubiquitin carboxyl-terminal hydrolase isozyme L1                           | 229                        | 24808              | 5.33            | 43                           | 17                                       | 15                             | 11                                         | 15                                    | 0.85                           | 5.28  |
| RTFAF_HUMAN           | RNA transcription, translation and transport factor protein                | 222                        | 28051              | 8.19            | 12                           | 6                                        | 7                              | 5                                          | 7                                     | 0.43                           | 1.06  |
| CSF1_HUMAN            | Rap1 GTPase-GDP dissociation stimulator 1                                  | 222                        | 66275              | 5.17            | 19                           | 9                                        | 11                             | 7                                          | 11                                    | 0.4                            | 0.55  |
| CGD41_HUMAN           | Dolich-e-cad domain-containing protein 47                                  | 220                        | 55838              | 4.76            | 13                           | 8                                        | 5                              | 2                                          | 5                                     | 0.2                            | 0.16  |
| AMPYL_HUMAN           | Aminopeptidase B                                                           | 219                        | 72549              | 5.51            | 15                           | 9                                        | 9                              | 5                                          | 9                                     | 0.23                           | 0.41  |
| EIF3A_HUMAN           | Eukaryotic translation initiation factor 3 subunit A                       | 218                        | 168468             | 6.38            | 21                           | 11                                       | 12                             | 5                                          | 12                                    | 0.14                           | 0.13  |
| RL1_HUMAN             | 6S ribosomal protein L1                                                    | 218                        | 46080              | 15.19           | 18                           | 9                                        | 4                              | 9                                          | 4                                     | 0.32                           | 0.72  |
| GRAG2_HUMAN           | Quarner nucleotide-binding protein G0 subunit alpha-2                      | 217                        | 46425              | 5.34            | 28                           | 12                                       | 12                             | 6                                          | 12                                    | 0.44                           | 0.85  |
| GRAG1_HUMAN           | Quarner nucleotide-binding protein G0 subunit alpha isoforms X1a           | 123                        | 110956             | 4.91            | 9                            | 5                                        | 4                              | 4                                          | 3                                     | 0.06                           | 0.16  |
| SPD2_HUMAN            | SH3 and PX domain-containing protein 2A                                    | 216                        | 125213             | 9.01            | 11                           | 7                                        | 5                              | 3                                          | 5                                     | 0.08                           | 0.11  |
| GLYU2_HUMAN           | Series hydroxymethyltransferase, mitochondrial                             | 215                        | 55958              | 8.76            | 12                           | 5                                        | 7                              | 2                                          | 7                                     | 0.21                           | 0.45  |
| TPD52_HUMAN           | Tumor protein D54                                                          | 214                        | 22224              | 5.26            | 22                           | 10                                       | 8                              | 5                                          | 8                                     | 0.56                           | 2.05  |
| LMAN1_HUMAN           | Protein EHD3-3                                                             | 213                        | 57513              | 6.3             | 11                           | 6                                        | 5                              | 3                                          | 5                                     | 0.15                           | 0.34  |
| EGU1_HUMAN            | Endoplasmic reticulum                                                      | 213                        | 70533              | 6.14            | 21                           | 11                                       | 11                             | 9                                          | 11                                    | 0.3                            | 0.7   |
| THO2_HUMAN            | 3-hydroxyacyl-CoA thioester, peroxisomal                                   | 212                        | 44264              | 8.76            | 11                           | 9                                        | 6                              | 4                                          | 6                                     | 0.33                           | 0.46  |
| CBSP_HUMAN            | Calcium-binding, fibronectin-binding protein                               | 212                        | 18637              | 9.51            | 5                            | 4                                        | 2                              | 1                                          | 2                                     | 0.19                           | 0.25  |
| KIM1_HUMAN            | Kinesin-1 heavy chain                                                      | 212                        | 108617             | 6.12            | 24                           | 12                                       | 19                             | 10                                         | 19                                    | 0.33                           | 0.46  |
| PDYK1_HUMAN           | Pyridine kinase                                                            | 211                        | 35060              | 5.78            | 12                           | 8                                        | 7                              | 4                                          | 7                                     | 0.38                           | 0.61  |
| TCTP_HUMAN            | Translationally-controlled tumor protein                                   | 211                        | 19583              | 4.84            | 16                           | 11                                       | 5                              | 5                                          | 5                                     | 0.43                           | 2.24  |
| ALDH2_HUMAN           | Aldehyde reductase                                                         | 210                        | 35830              | 6.51            | 17                           | 8                                        | 10                             | 5                                          | 10                                    | 0.54                           | 0.78  |
| CAL2A_HUMAN           | E-cadherin-binding protein subunit alpha-1                                 | 210                        | 32802              | 5.45            | 18                           | 8                                        | 9                              | 5                                          | 7                                     | 0.55                           | 0.88  |
| EIF3F_HUMAN           | Eukaryotic translation initiation factor 3 subunit F                       | 208                        | 37540              | 5.24            | 8                            | 5                                        | 6                              | 4                                          | 6                                     | 0.28                           | 0.66  |
| OWH1_HUMAN            | Ovalbumin-1                                                                | 208                        | 33130              | 5.14            | 12                           | 9                                        | 5                              | 3                                          | 5                                     | 0.35                           | 0.46  |
| DOTN1_HUMAN           | Dominant subunit 1                                                         | 207                        | 141607             | 5.81            | 13                           | 8                                        | 8                              | 4                                          | 8                                     | 0.13                           | 0.13  |
| SAHR_HUMAN            | Adenosine homocysteine                                                     | 207                        | 47685              | 5.92            | 17                           | 7                                        | 10                             | 5                                          | 10                                    | 0.29                           | 0.55  |
| ROTH_HUMAN            | Reticulobulky-1                                                            | 207                        | 38866              | 4.86            | 17                           | 8                                        | 9                              | 5                                          | 9                                     | 0.27                           | 0.28  |
| SMYD1_HUMAN           | S-methyltransferase                                                        | 207                        | 62327              | 6.58            | 13                           | 7                                        | 9                              | 4                                          | 9                                     | 0.33                           | 0.3   |
| PAPSS2_HUMAN          | Paracetamol 2-phosphoadenosine 5-phosphosulfate synthase 2                 | 206                        | 69457              | 8.18            | 19                           | 10                                       | 9                              | 7                                          | 9                                     | 0.28                           | 0.52  |
| HTFA1_HUMAN           | Serine protease HTFA1                                                      | 206                        | 51255              | 8.09            | 5                            | 5                                        | 3                              | 3                                          | 3                                     | 0.19                           | 0.28  |
| PHNPU_HUMAN           | Purine nucleoside phosphorylase                                            | 205                        | 32097              | 6.45            | 13                           | 10                                       | 9                              | 6                                          | 9                                     | 0.45                           | 1.17  |
| CDB1_HUMAN            | CDB1 antigen                                                               | 205                        | 25792              | 5.09            | 8                            | 6                                        | 3                              | 3                                          | 3                                     | 0.25                           | 0.62  |
| PHS2_HUMAN            | Prohibitin-2                                                               | 205                        | 32276              | 9.83            | 12                           | 9                                        | 8                              | 5                                          | 8                                     | 0.37                           | 0.86  |
| RLA2_HUMAN            | 6S acidic ribosomal protein P0                                             | 201                        | 34252              | 5.71            | 20                           | 11                                       | 11                             | 8                                          | 11                                    | 0.56                           | 1.97  |
| TRD1_HUMAN            | Thrombospondin domain-containing protein 17                                | 201                        | 12832              | 5.4             | 11                           | 9                                        | 6                              | 3                                          | 6                                     | 0.21                           | 0.31  |
| GSOT1_HUMAN           | Glutathione S-transferase omega-1                                          | 201                        | 27548              | 6.23            | 24                           | 13                                       | 12                             | 6                                          | 12                                    | 0.63                           | 1.47  |
| PDL1_HUMAN            | PDZ and LIM domain protein 1                                               | 200                        | 36049              | 6.56            | 15                           | 9                                        | 8                              | 5                                          | 8                                     | 0.43                           | 1     |
| ZYX_HUMAN             | Zyxin                                                                      | 199                        | 61298              | 6.22            | 24                           | 11                                       | 12                             | 6                                          | 12                                    | 0.4                            | 0.72  |
| SRPR1_HUMAN           | Signal recognition particle receptor subunit alpha                         | 199                        | 69767              | 9.07            | 11                           | 5                                        | 8                              | 4                                          | 8                                     | 0.22                           | 0.27  |
| FKBP1_HUMAN           | Peptidyl-farnesyl-oxo-trans isomerase FKBP1A                               | 197                        | 11943              | 7.88            | 11                           | 9                                        | 4                              | 4                                          | 4                                     | 0.49                           | 2.89  |
| MATP1_HUMAN           | Mitochondrial-associated protein 1A                                        | 195                        | 305298             | 4.85            | 18                           | 8                                        | 14                             | 5                                          | 14                                    | 0.1                            | 0.07  |
| HRPR1_HUMAN           | Heterogeneous nuclear ribonucleoprotein M                                  | 195                        | 77464              | 8.84            | 16                           | 7                                        | 12                             | 5                                          | 12                                    | 0.26                           | 0.31  |
| PDS4_HUMAN            | Protein disulfide-isomerase A4                                             | 194                        | 72887              | 4.86            | 16                           | 8                                        | 13                             | 6                                          | 13                                    | 0.27                           | 0.49  |
| GORO1_HUMAN           | Quinone oxidoreductase PIG3                                                | 194                        | 35514              | 6.87            | 8                            | 6                                        | 5                              | 4                                          | 5                                     | 0.24                           | 0.8   |
| OLA1_HUMAN            | Ola-like A1Pase 1                                                          | 193                        | 44715              | 7.64            | 9                            | 6                                        | 7                              | 4                                          | 7                                     | 0.26                           | 0.45  |
| LMAN2_HUMAN           | Vascular integrin-membrane protein VPS36                                   | 192                        | 40203              | 6.46            | 12                           | 5                                        | 7                              | 3                                          | 7                                     | 0.31                           | 0.36  |
| PEPD2_HUMAN           | Xaa-Pro dipeptidase                                                        | 191                        | 54513              | 5.64            | 9                            | 5                                        | 7                              | 5                                          | 7                                     | 0.28                           | 0.47  |
| CTHR1_HUMAN           | Collagen triple helix repeat-containing protein 1                          | 191                        | 28207              | 8.31            | 16                           | 8                                        | 7                              | 4                                          | 7                                     | 0.48                           | 0.88  |
| EPD3_HUMAN            | Eukaryotic translation initiation factor 3 subunit 1                       | 191                        | 36478              | 5.38            | 17                           | 11                                       | 7                              | 7                                          | 7                                     | 0.44                           | 0.86  |
| PCYO3_HUMAN           | Prenyltransferase 3                                                        | 190                        | 56004              | 5.8             | 8                            | 7                                        | 6                              | 5                                          | 6                                     | 0.24                           | 0.45  |
| PSB1_HUMAN            | Proteinase subunit beta type-7                                             | 190                        | 28446              | 7.57            | 6                            | 4                                        | 3                              | 2                                          | 3                                     | 0.21                           | 0.32  |
| LPP1_HUMAN            | Lipomycin-preferred partner                                                | 190                        | 65704              | 7.18            | 9                            | 6                                        | 7                              | 5                                          | 7                                     | 0.28                           | 0.46  |
| ICL1_HUMAN            | Calistatin                                                                 | 187                        | 76526              | 4.88            | 10                           | 8                                        | 7                              | 6                                          | 7                                     | 0.2                            | 0.39  |
| TMBAL1_HUMAN          | Transmembrane protein 43                                                   | 186                        | 44847              | 7.86            | 12                           | 9                                        | 6                              | 5                                          | 6                                     | 0.39                           | 0.58  |
| CDG31_HUMAN           | Hsp80 co-chaperone Cdc37                                                   | 186                        | 44440              | 5.17            | 14                           | 7                                        | 7                              | 5                                          | 7                                     | 0.26                           | 0.8   |
| SNR3_HUMAN            | Sorting nexin-3                                                            | 185                        | 66550              | 5.4             | 8                            | 5                                        | 5                              | 3                                          | 5                                     | 0.21                           | 0.21  |
| QDR1_HUMAN            | Rho GTPase-dissociation inhibitor 1                                        | 185                        | 23193              | 5.02            | 18                           | 11                                       | 7                              | 5                                          | 7                                     | 0.51                           | 1.44  |
| RABP2_HUMAN           | Cellular retinoic acid-binding protein 2                                   | 185                        | 15683              | 5.42            | 5                            | 4                                        | 2                              | 2                                          | 2                                     | 0.27                           | 0.69  |
| LAMP1_HUMAN           | Lysosome-associated membrane glycoprotein 1                                | 184                        | 44854              | 9               | 12                           | 7                                        | 6                              | 3                                          | 6                                     | 0.12                           | 0.32  |
| MYO18_HUMAN           | Unconventional myosin-Ib                                                   | 182                        | 131902             | 9.43            | 25                           | 11                                       | 16                             | 9                                          | 16                                    | 0.23                           | 0.33  |
| PDS2_HUMAN            | Dolich-4-pyrophosphate-carboxylate synthase                                | 181                        | 67248              | 6.68            | 13                           | 6                                        | 7                              | 2                                          | 7                                     | 0.15                           | 0.1   |
| SYN1_HUMAN            | Asparagine-GDNA lipase, cytosolic                                          | 179                        | 62903              | 5.9             | 14                           | 11                                       | 10                             | 9                                          | 10                                    | 0.32                           | 0.82  |
| PRSS4_HUMAN           | ZEB proteasome regulatory subunit 6A                                       | 179                        | 49172              | 5.13            | 18                           | 8                                        | 14                             | 7                                          | 8                                     | 0.42                           | 0.97  |
| PUR1_HUMAN            | Mitochondrial protein ADE2                                                 | 177                        | 47449              | 6.95            | 13                           | 7                                        | 10                             | 5                                          | 10                                    | 0.5                            | 0.56  |
| GLUT2_HUMAN           | Glucose transporter 2 subunit beta                                         | 174                        | 56053              | 5.2             | 11                           | 4                                        | 8                              | 3                                          | 8                                     | 0.27                           | 0.25  |
| GLUT1_HUMAN           | Glucose transporter 1 subunit beta                                         | 172                        | 59389              | 4.33            | 20                           | 11                                       | 10                             | 8                                          | 10                                    | 0.26                           | 0.88  |
| HSP90A_HUMAN          | Heat shock protein beta-5                                                  | 170                        | 17125              | 5.85            | 14                           | 8                                        | 8                              | 5                                          | 8                                     | 0.86                           | 2.32  |
| PSD12_HUMAN           | ZEB proteasome non-ATPase regulatory subunit 13                            | 169                        | 42918              | 5.53            | 11                           | 6                                        | 7                              | 3                                          | 7                                     | 0.29                           | 0.34  |
| GLCN_HUMAN            | Glycosylkeratinase                                                         | 169                        | 58678              | 7.26            | 9                            | 8                                        | 7                              | 6                                          | 7                                     | 0.26                           | 0.52  |
| IFAG1_HUMAN           | Eukaryotic translation initiation factor 4 gamma 1                         | 166                        | 175382             | 5.35            | 13                           | 7                                        | 11                             | 5                                          | 10                                    | 0.13                           | 0.13  |
| IFAG2_HUMAN           | Eukaryotic translation initiation factor 4 gamma 2                         | 38                         | 178542             | 5.27            | 5                            | 2                                        | 5                              | 2                                          | 4                                     | 0.05                           | 0.05  |
| EPD1_HUMAN            | Eukaryotic translation initiation factor 3 subunit D                       | 165                        | 63532              | 5.79            | 9                            | 6                                        | 5                              | 3                                          | 5                                     | 0.16                           | 0.22  |
| SDHA_HUMAN            | Succinate dehydrogenase (ubiquinone), B-type, mitochondrial                | 165                        | 72465              | 7.06            | 12                           | 6                                        | 5                              | 2                                          | 5                                     | 0.19                           | 0.12  |
| E4L1L_HUMAN           | Band 4.1-like protein 3                                                    | 164                        | 120603             | 5.09            | 17                           | 7                                        | 9                              | 5                                          | 9                                     | 0.16                           | 0.19  |
| FAPB1_HUMAN           | Fatty acid-binding protein, subdomain                                      | 163                        | 15155              | 6.6             | 12                           | 4                                        | 5                              | 3                                          | 4                                     | 0.46                           | 0.31  |
| RALA_HUMAN            | Ras-related protein RalA                                                   | 163                        | 23552              | 6.88            | 10                           | 7                                        | 7                              | 4                                          | 7                                     | 0.17                           | 1.02  |
| GBSL_HUMAN            | Gamma-glutamyl-beta-alanine synthase-like protein                          | 162                        | 60548              | 6.2             | 7                            | 4                                        | 4                              | 3                                          | 4                                     | 0.18                           | 0.23  |
| AKA12_HUMAN           | Acylase anchor protein 12                                                  | 162                        | 19197              | 4.37            | 11                           | 5                                        | 9                              | 3                                          | 9                                     | 0.09                           | 0.07  |

<sup>a</sup>Protein score is calculated from the score of the peptide attributed to the protein.

<sup>b</sup>pI is (Predicted) isoelectric point.

<sup>c</sup>Number of matches is spectrum number matched to protein<sup>11</sup>.

<sup>d</sup>Number of significant matches is spectrum number that matches protein and exceeds the identification criteria.

<sup>e</sup>Number of sequences is number of peptides matched to protein<sup>12</sup>.

<sup>f</sup>Number of significant sequences is number of peptides exceeding the identification criteria matched to proteins.

<sup>g</sup>Number of unique sequences is a unique<sup>13</sup> number of peptides matched to proteins.

<sup>h</sup>Sequence coverage is the ratio of the total number of matched peptide residues to the total length of the protein.

<sup>i</sup>Exponentially Modified Protein Abundance Index ([http://www.matrixscience.com/help/quant\\_help.html](http://www.matrixscience.com/help/quant_help.html)).



Table S2. Cont'd.

| UniProt/Swiss-Prot ID | Description                                                                       | Protein score <sup>a</sup> | Protein mass (kDa) | pI <sup>b</sup> | Num. of matches <sup>c</sup> | Num. of significant matches <sup>d</sup> | Num. of sequences <sup>e</sup> | Num. of significant sequences <sup>f</sup> | Num. of unique sequences <sup>g</sup> | Sequence coverage <sup>h</sup> | emPAI <sup>i</sup> |
|-----------------------|-----------------------------------------------------------------------------------|----------------------------|--------------------|-----------------|------------------------------|------------------------------------------|--------------------------------|--------------------------------------------|---------------------------------------|--------------------------------|--------------------|
| DHRS1_HUMAN           | Dehydrogenase/reductase SDR family member 7                                       | 116                        | 39274              | 5.59            | 9                            | 5                                        | 5                              | 4                                          | 5                                     | 0.41                           | 0.8                |
| CEB1_HUMAN            | Chromodomain protein homolog 3                                                    | 115                        | 20788              | 5.23            | 6                            | 5                                        | 5                              | 4                                          | 5                                     | 0.45                           | 1.21               |
| ITGA2_HUMAN           | Integrin $\alpha$ IIb $\beta$                                                     | 115                        | 129214             | 5.16            | 13                           | 6                                        | 12                             | 6                                          | 12                                    | 0.19                           | 0.21               |
| NAAL1_HUMAN           | Nucleoside diphosphate kinase 15, NaH auxiliary subunit                           | 115                        | 101208             | 7.23            | 11                           | 5                                        | 7                              | 3                                          | 7                                     | 0.14                           | 0.13               |
| LGL4_HUMAN            | Lactoylglutathione lyase                                                          | 115                        | 20764              | 5.12            | 8                            | 3                                        | 5                              | 2                                          | 5                                     | 0.39                           | 0.49               |
| LAMP2_HUMAN           | Lysosome-associated membrane glycoprotein 2                                       | 114                        | 44932              | 5.25            | 6                            | 5                                        | 3                              | 3                                          | 3                                     | 0.89                           | 0.32               |
| PODOL_HUMAN           | Progerin-related cell death protein 6                                             | 114                        | 21855              | 5.16            | 5                            | 3                                        | 3                              | 2                                          | 3                                     | 0.26                           | 0.46               |
| LICD2_HUMAN           | Lysosomal acid lipase (cholesterol) ester hydrolase                               | 114                        | 45390              | 6.42            | 1                            | 1                                        | 1                              | 1                                          | 1                                     | 0.05                           | 0.1                |
| PTTG1_HUMAN           | Platylin tumor-transforming gene 1 protein-interacting protein                    | 114                        | 20310              | 5.14            | 3                            | 3                                        | 1                              | 1                                          | 1                                     | 0.21                           | 0.27               |
| PRRC1_HUMAN           | Protein PRRC1                                                                     | 114                        | 46672              | 5.56            | 4                            | 3                                        | 2                              | 2                                          | 2                                     | 0.87                           | 0.2                |
| F13A1_HUMAN           | Actin-10-interacting protein                                                      | 113                        | 41305              | 5.18            | 11                           | 5                                        | 6                              | 3                                          | 6                                     | 0.21                           | 0.35               |
| ATPO_HUMAN            | ATP synthase subunit delta, mitochondrial                                         | 113                        | 17479              | 5.38            | 6                            | 5                                        | 3                              | 2                                          | 3                                     | 0.23                           | 0.6                |
| STX12_HUMAN           | Syntaxin-12                                                                       | 113                        | 31622              | 5.45            | 7                            | 3                                        | 6                              | 3                                          | 6                                     | 0.36                           | 0.48               |
| LACHN                 | Lipase La protease                                                                | 113                        | 46939              | 6.68            | 9                            | 3                                        | 9                              | 3                                          | 8                                     | 0.29                           | 0.31               |
| BCAT1_HUMAN           | Branched-chain amino acid aminotransferase, cytosolic                             | 112                        | 42939              | 5.17            | 15                           | 6                                        | 10                             | 4                                          | 10                                    | 0.51                           | 0.47               |
| PDOL1_HUMAN           | PDZ and LIM domain protein 5                                                      | 112                        | 63904              | 8.55            | 25                           | 10                                       | 14                             | 7                                          | 9                                     | 0.34                           | 0.58               |
| ROR1_HUMAN            | Retinoid receptor                                                                 | 112                        | 36554              | 4.26            | 14                           | 5                                        | 9                              | 5                                          | 6                                     | 0.38                           | 0.76               |
| PUR2_HUMAN            | Trifunctional purine biosynthetic protein adenosine-3                             | 112                        | 107899             | 8.26            | 14                           | 4                                        | 11                             | 4                                          | 11                                    | 0.23                           | 0.17               |
| PIR1_HUMAN            | CAD protein                                                                       | 112                        | 242829             | 8.02            | 16                           | 6                                        | 10                             | 4                                          | 10                                    | 0.31                           | 0.07               |
| ATPO2_HUMAN           | ATP synthase subunit O, mitochondrial                                             | 112                        | 22253              | 9.97            | 10                           | 4                                        | 5                              | 2                                          | 5                                     | 0.27                           | 0.43               |
| HEBP2_HUMAN           | Heme-binding protein 2                                                            | 112                        | 22861              | 4.58            | 3                            | 2                                        | 3                              | 2                                          | 3                                     | 0.24                           | 0.43               |
| DLB1_HUMAN            | DnaJ homolog subfamily B member 11                                                | 111                        | 40469              | 5.51            | 10                           | 3                                        | 4                              | 2                                          | 4                                     | 0.22                           | 0.23               |
| DNAA2_HUMAN           | DnaJ homolog subfamily A member 2                                                 | 111                        | 45717              | 6.06            | 4                            | 4                                        | 3                              | 3                                          | 3                                     | 0.18                           | 0.31               |
| TNRC18_HUMAN          | Tropomodulin-3                                                                    | 111                        | 39570              | 5.08            | 6                            | 4                                        | 5                              | 3                                          | 5                                     | 0.22                           | 0.37               |
| AAT10_HUMAN           | Aspartate aminotransferase, mitochondrial                                         | 111                        | 47467              | 9.14            | 6                            | 5                                        | 2                              | 2                                          | 5                                     | 0.18                           | 0.19               |
| TADBP_HUMAN           | TAR DNA-binding protein 43                                                        | 111                        | 44711              | 5.85            | 5                            | 5                                        | 4                              | 4                                          | 4                                     | 0.18                           | 0.45               |
| OGAD1_HUMAN           | OGA domain-containing protein 1                                                   | 111                        | 27699              | 7.02            | 3                            | 2                                        | 2                              | 2                                          | 2                                     | 0.11                           | 0.16               |
| VATE1_HUMAN           | V-type proton ATPase subunit E 1                                                  | 110                        | 26129              | 7.71            | 9                            | 6                                        | 5                              | 3                                          | 5                                     | 0.24                           | 0.61               |
| LIMS1_HUMAN           | LIM and senescent cell antigen-like-containing domain protein 1                   | 110                        | 37226              | 8.43            | 6                            | 5                                        | 3                              | 3                                          | 3                                     | 0.15                           | 0.4                |
| PST1_HUMAN            | PstA                                                                              | 109                        | 30361              | 6.51            | 2                            | 2                                        | 1                              | 1                                          | 1                                     | 0.06                           | 0.15               |
| SGO2_HUMAN            | Decatenation helicase                                                             | 109                        | 32051              | 9.24            | 2                            | 2                                        | 2                              | 2                                          | 2                                     | 0.11                           | 0.3                |
| DDIT3_HUMAN           | Ddit3 subunit 3                                                                   | 109                        | 21106              | 5.37            | 8                            | 3                                        | 5                              | 3                                          | 5                                     | 0.52                           | 0.38               |
| DORX_HUMAN            | DORX domain-containing protein 1                                                  | 109                        | 35569              | 5.12            | 5                            | 5                                        | 4                              | 4                                          | 4                                     | 0.26                           | 0.79               |
| FURBP2_HUMAN          | Far upstream element-binding protein 2                                            | 109                        | 73070              | 6.65            | 17                           | 4                                        | 14                             | 3                                          | 14                                    | 0.32                           | 0.19               |
| PACRG_HUMAN           | Protein kinase C $\delta$ and $\epsilon$ activator substrate in neurons protein 2 | 109                        | 55704              | 5.08            | 8                            | 5                                        | 5                              | 3                                          | 5                                     | 0.17                           | 0.16               |
| TWFL1_HUMAN           | Twist1-like-1                                                                     | 108                        | 40258              | 6.48            | 6                            | 6                                        | 3                              | 3                                          | 3                                     | 0.14                           | 0.26               |
| RSU1_HUMAN            | Ras suppressor protein 1                                                          | 108                        | 31521              | 8.37            | 13                           | 8                                        | 8                              | 5                                          | 8                                     | 0.84                           | 0.93               |
| WDR11_HUMAN           | WD repeat-containing protein 11                                                   | 108                        | 13659              | 6.46            | 5                            | 3                                        | 3                              | 3                                          | 3                                     | 0.26                           | 0.57               |
| GNA1_HUMAN            | Guanosine 6-phosphate N-acetyltransferase                                         | 107                        | 20736              | 8.17            | 3                            | 3                                        | 3                              | 3                                          | 3                                     | 0.29                           | 0.81               |
| PRPF2_HUMAN           | Prp-2                                                                             | 107                        | 15026              | 4.59            | 8                            | 6                                        | 3                              | 3                                          | 3                                     | 0.38                           | 0.71               |
| GOLP3_HUMAN           | Golgi phosphoprotein 3                                                            | 107                        | 33790              | 6.05            | 8                            | 4                                        | 4                              | 2                                          | 4                                     | 0.26                           | 0.28               |
| TOM2_HUMAN            | Protein- $\gamma$ -kluane gamma-kluantyltransferase 2                             | 107                        | 77280              | 5.11            | 15                           | 5                                        | 10                             | 4                                          | 10                                    | 0.31                           | 0.24               |
| CSNA1_HUMAN           | Cytoskeleton cofilin subunit (BA), mitochondrial                                  | 107                        | 12143              | 8.3             | 1                            | 1                                        | 1                              | 1                                          | 1                                     | 0.04                           | 0.4                |
| EIF3B_HUMAN           | Eukaryotic translation initiation factor 3 subunit B                              | 107                        | 92424              | 4.89            | 18                           | 7                                        | 11                             | 4                                          | 9                                     | 0.25                           | 0.2                |
| BLVRD_HUMAN           | Blood redoxin (NADPH)                                                             | 107                        | 22106              | 7.13            | 7                            | 4                                        | 3                              | 1                                          | 4                                     | 0.28                           | 0.21               |
| LYO1_HUMAN            | Protein-lysine $\epsilon$ -oxidase                                                | 106                        | 46915              | 6.36            | 7                            | 2                                        | 4                              | 2                                          | 4                                     | 0.16                           | 0.19               |
| CHMP5_HUMAN           | Charged multivesicular body protein 5                                             | 106                        | 24555              | 4.68            | 3                            | 3                                        | 2                              | 2                                          | 2                                     | 0.22                           | 0.4                |
| MCTD1_HUMAN           | MED5 complex subunit MED1                                                         | 105                        | 5802               | 6.89            | 2                            | 1                                        | 2                              | 2                                          | 2                                     | 0.02                           | 0.88               |
| GOB2B_HUMAN           | Gob2- $\beta$ 2 domain-containing protein 80                                      | 104                        | 108106             | 8.72            | 5                            | 4                                        | 3                              | 2                                          | 3                                     | 0.89                           | 0.08               |
| STOM_HUMAN            | Erythrocyte band 7 integral membrane protein                                      | 104                        | 31711              | 7.71            | 7                            | 5                                        | 2                              | 1                                          | 2                                     | 0.13                           | 0.14               |
| AKT1C_HUMAN           | AKR-iso1 reductase family 1 member C1                                             | 104                        | 36765              | 8.02            | 10                           | 5                                        | 5                              | 3                                          | 5                                     | 0.26                           | 0.57               |
| AKT1G_HUMAN           | AKR-iso1 reductase family 1 member C3                                             | 104                        | 36830              | 8.06            | 9                            | 3                                        | 4                              | 3                                          | 2                                     | 0.2                            | 0.4                |
| POKOR_HUMAN           | Phosphatidylinositol carboxylase (GTP), mitochondrial                             | 104                        | 70865              | 7.57            | 13                           | 7                                        | 9                              | 4                                          | 8                                     | 0.28                           | 0.27               |
| MST1_HUMAN            | Microsomal glutathione S-transferase 1                                            | 104                        | 17587              | 9.41            | 6                            | 3                                        | 3                              | 2                                          | 3                                     | 0.25                           | 1.02               |
| EPH3_HUMAN            | E-phosphatidylinositoltransferase                                                 | 104                        | 27530              | 8.57            | 9                            | 3                                        | 6                              | 2                                          | 6                                     | 0.21                           | 0.35               |
| PRRC3_HUMAN           | DNA-dependent protein kinase catalytic subunit                                    | 103                        | 468738             | 6.75            | 23                           | 8                                        | 18                             | 4                                          | 18                                    | 0.04                           | 0.89               |
| HNRPB_HUMAN           | Heterogeneous nuclear ribonucleoprotein H3                                        | 101                        | 38903              | 6.37            | 4                            | 2                                        | 3                              | 1                                          | 3                                     | 0.21                           | 0.32               |
| THREX1_HUMAN          | Thioredoxin-DNA lyase, cytosolic                                                  | 101                        | 43302              | 6.23            | 21                           | 8                                        | 13                             | 4                                          | 13                                    | 0.21                           | 0.22               |
| TOP1_HUMAN            | Topoisomerase I                                                                   | 101                        | 66928              | 8.22            | 8                            | 5                                        | 4                              | 2                                          | 4                                     | 0.17                           | 0.13               |
| ARBP1_HUMAN           | ADP-ribosylation factor-like protein 6-interacting protein 1                      | 101                        | 23347              | 8.38            | 4                            | 4                                        | 1                              | 1                                          | 1                                     | 0.14                           | 0.19               |
| TRMT1_HUMAN           | Tyrosine-protein phosphatase non-receptor type 11                                 | 100                        | 65393              | 8.87            | 11                           | 5                                        | 7                              | 4                                          | 7                                     | 0.23                           | 0.28               |
| TOM1B_HUMAN           | Mitochondrial import receptor subunit TOM1B                                       | 100                        | 67412              | 8.75            | 5                            | 4                                        | 4                              | 3                                          | 4                                     | 0.12                           | 0.2                |
| NPL1_HUMAN            | Nucleosome assembly protein 1-like 4                                              | 100                        | 42787              | 6.46            | 8                            | 3                                        | 5                              | 1                                          | 4                                     | 0.26                           | 0.3                |
| IFIA1_HUMAN           | Eukaryotic translation initiation factor 1A, X-chromosomal                        | 100                        | 14650              | 5.07            | 3                            | 3                                        | 1                              | 1                                          | 1                                     | 0.1                            | 0.38               |
| SVPL1_HUMAN           | Smad3 phosphorylation protein 1                                                   | 99                         | 28547              | 8.89            | 2                            | 2                                        | 1                              | 1                                          | 1                                     | 0.87                           | 0.16               |
| PP1F1_HUMAN           | Protein phosphatase 1 regulatory subunit 7                                        | 99                         | 41529              | 4.84            | 8                            | 4                                        | 7                              | 4                                          | 7                                     | 0.31                           | 0.49               |
| CRTPA_HUMAN           | Cartilage-associated protein                                                      | 99                         | 46532              | 5.5             | 10                           | 4                                        | 6                              | 4                                          | 5                                     | 0.22                           | 0.43               |
| COPD1_HUMAN           | Coupling subunit delta                                                            | 98                         | 27174              | 5.89            | 19                           | 5                                        | 16                             | 5                                          | 16                                    | 0.48                           | 0.44               |
| ECM21_HUMAN           | Proteasome-associated protein (ECM2) homolog                                      | 98                         | 204180             | 6.74            | 16                           | 10                                       | 5                              | 10                                         | 10                                    | 0.12                           | 0.06               |
| CTGF_HUMAN            | Connective tissue growth factor                                                   | 98                         | 38065              | 6.43            | 16                           | 6                                        | 10                             | 4                                          | 10                                    | 0.43                           | 0.55               |
| ARF4_HUMAN            | ADP-ribosylation factor 4                                                         | 97                         | 20089              | 9.04            | 11                           | 4                                        | 7                              | 2                                          | 6                                     | 0.58                           | 0.51               |
| DCN1_HUMAN            | DCN1-like protein 1                                                               | 96                         | 30105              | 5.18            | 4                            | 2                                        | 3                              | 1                                          | 3                                     | 0.2                            | 0.15               |
| VAPAB_HUMAN           | Vesicle-associated membrane protein-associated protein A                          | 96                         | 27875              | 8.8             | 10                           | 4                                        | 7                              | 2                                          | 7                                     | 0.4                            | 0.35               |
| CTSD1_HUMAN           | Catenin delta-1                                                                   | 97                         | 108133             | 5.68            | 20                           | 7                                        | 13                             | 4                                          | 13                                    | 0.24                           | 0.21               |
| UTRO1_HUMAN           | Urographin                                                                        | 97                         | 384220             | 8.2             | 10                           | 4                                        | 7                              | 1                                          | 7                                     | 0.84                           | 0.01               |
| ULA1_HUMAN            | NECD-associated enzyme E1 regulatory subunit                                      | 97                         | 60209              | 5.25            | 4                            | 3                                        | 3                              | 2                                          | 3                                     | 0.13                           | 0.15               |
| MCN2_HUMAN            | Protein MCN2 homolog                                                              | 97                         | 190237             | 5.73            | 4                            | 3                                        | 1                              | 1                                          | 1                                     | 0.62                           | 0.02               |
| POAG_HUMAN            | Phosphoglucomutase-2                                                              | 94                         | 68240              | 6.28            | 8                            | 6                                        | 4                              | 2                                          | 4                                     | 0.13                           | 0.2                |
| CHAPL_HUMAN           | Chitinase-like-associated protein 5                                               | 97                         | 25592              | 7.95            | 13                           | 5                                        | 7                              | 3                                          | 7                                     | 0.87                           | 0.06               |
| KLC1_HUMAN            | Kinesin light chain 1                                                             | 97                         | 65269              | 5.87            | 10                           | 3                                        | 7                              | 3                                          | 7                                     | 0.2                            | 0.21               |
| ERP4_HUMAN            | Endoplasmic reticulum resident protein 44                                         | 96                         | 48941              | 5.09            | 9                            | 4                                        | 6                              | 2                                          | 6                                     | 0.16                           | 0.19               |
| FAAH_HUMAN            | Fatty acid hydrolase                                                              | 96                         | 46244              | 8.46            | 3                            | 2                                        | 1                              | 2                                          | 2                                     | 0.12                           | 0.86               |
| GOPD1_HUMAN           | Golgi resident protein GOPD1                                                      | 96                         | 60556              | 5.02            | 7                            | 3                                        | 6                              | 3                                          | 6                                     | 0.21                           | 0.23               |
| ANKK1_HUMAN           | Ankrran K1                                                                        | 95                         | 52766              | 5.52            | 8                            | 4                                        | 5                              | 3                                          | 5                                     | 0.14                           | 0.77               |
| CIT1C_HUMAN           | Cit-1 tetrahydrofolate synthase, cytosolic                                        | 96                         | 101495             | 8.89            | 15                           | 7                                        | 12                             | 6                                          | 12                                    | 0.21                           | 0.28               |
| SRP72_HUMAN           | Signal recognition particle subunit SRP72                                         | 96                         | 74560              | 8.31            | 13                           | 7                                        | 8                              | 4                                          | 8                                     | 0.25                           | 0.25               |
| OPH1_HUMAN            | Golgi- $\beta$ 1-phosphate mannose transferase subunit 1                          | 95                         | 25616              | 5.37            | 5                            | 2                                        | 4                              | 1                                          | 4                                     | 0.34                           | 0.15               |
| CRYAB_HUMAN           | Alpha-crystallin B chain                                                          | 95                         | 20146              | 6.76            | 6                            | 4                                        | 3                              | 2                                          | 3                                     | 0.29                           | 0.51               |
| OTU1_HUMAN            | High affinity cationic amino acid transporter 1                                   | 95                         | 87584              | 5.29            | 10                           | 6                                        | 4                              | 2                                          | 4                                     | 0.1                            | 0.18               |
| PSA_HUMAN             | Prostate-specific antigen                                                         | 95                         | 102311             | 5.49            | 16                           | 4                                        | 13                             | 3                                          | 13                                    | 0.21                           | 0.13               |
| OTUB1_HUMAN           | Ubiquitin thioesterase OTUB1                                                      | 95                         | 31264              | 4.65            | 7                            | 5                                        | 4                              | 3                                          | 4                                     | 0.33                           | 0.7                |
| PIR1_HUMAN            | GTP synthase 1                                                                    | 94                         | 66446              | 6.02            | 10                           | 6                                        | 6                              | 3                                          | 6                                     | 0.17                           | 0.21               |
| ATP5F1_HUMAN          | ATP synthase subunit f, mitochondrial                                             | 94                         | 11421              | 8.65            | 9                            | 5                                        | 3                              | 2                                          | 3                                     | 0.5                            | 1.03               |
| DYN2_HUMAN            | Dynamitin-2                                                                       | 94                         | 80803              | 7.04            | 9                            | 4                                        | 7                              | 4                                          | 7                                     | 0.13                           | 0.19               |
| ORP1_HUMAN            | Protein orp1 homolog 2                                                            | 94                         | 29639              | 6.81            | 10                           | 4                                        | 6                              | 3                                          | 6                                     | 0.45                           | 0.82               |
| ERL2_HUMAN            | Efrin-2                                                                           | 93                         | 37815              | 5.47            | 8                            | 3                                        | 5                              | 2                                          | 5                                     | 0.25                           | 0.25               |
| OPNMB_HUMAN           | Transmembrane glycoprotein NMB                                                    | 93                         | 43882              | 6.17            | 4                            | 2                                        | 2                              | 1                                          | 2                                     | 0.95                           | 0.07               |
| LARP1_HUMAN           | Lysine-rich protein 1                                                             | 93                         | 123434             | 8.91            | 5                            | 3                                        | 4                              | 2                                          | 4                                     | 0.96                           | 0.07               |
| DOC1L_HUMAN           | Cytosolic dyx1c1 light intermediate chain 1                                       | 93                         | 56544              | 6.01            | 3                            | 2                                        | 2                              | 1                                          | 2                                     | 0.1                            | 0.08               |
| ABMD_HUMAN            | Protein adiponitrin-like transferase 5                                            | 93                         | 72638              | 5.68            | 9                            | 5                                        | 6                              | 4                                          | 6                                     | 0.25                           | 0.26               |

<sup>a</sup>Protein score is calculated from the score of the peptide attributed to the protein.

<sup>b</sup>pI is (Predicted) isoelectric point.

<sup>c</sup>Number of matches is spectrum number matched to protein<sup>1</sup>.

<sup>d</sup>Number of significant matches is spectrum number that matches protein and exceeds the identification criteria.

<sup>e</sup>Number of sequences is number of peptides matched to protein<sup>2</sup>.

<sup>f</sup>Number of significant sequences is number of peptides exceeding the identification criteria matched to proteins.

<sup>g</sup>Number of unique sequences is a unique<sup>3</sup> number of peptides matched to proteins.

<sup>h</sup>Sequence coverage is the ratio of the total number of matched peptide residues to the total length of the protein.

<sup>i</sup>Experimentally Modified Protein Abundance Index ([http://www.matrixscience.com/help/quant\\_help.html](http://www.matrixscience.com/help/quant_help.html)).



Table S2, Cont'd.

| UniProt/Swiss-Prot ID | Description                                                                       | Protein score <sup>a</sup> | Protein mass (kDa) | pI <sup>b</sup> | Num. of matches <sup>c</sup> | Num. of significant matches <sup>d</sup> | Num. of sequences <sup>e</sup> | Num. of significant sequences <sup>f</sup> | Num. of unique sequences <sup>g</sup> | Sequence coverage <sup>h</sup> | emPAI <sup>i</sup> |
|-----------------------|-----------------------------------------------------------------------------------|----------------------------|--------------------|-----------------|------------------------------|------------------------------------------|--------------------------------|--------------------------------------------|---------------------------------------|--------------------------------|--------------------|
| CTP1_HUMAN            | Cytidine FMN-interacting protein 1                                                | 93                         | 145089             | 6.48            | 8                            | 3                                        | 8                              | 3                                          | 8                                     | 0.1                            | 0.09               |
| PAC2_HUMAN            | Serine/threonine-protein kinase PAK 2                                             | 92                         | 58008              | 5.59            | 7                            | 4                                        | 4                              | 3                                          | 4                                     | 0.13                           | 0.24               |
| PQD5_HUMAN            | GPI transamidase component PQD-5                                                  | 92                         | 61617              | 6.05            | 3                            | 3                                        | 2                              | 2                                          | 2                                     | 0.09                           | 0.15               |
| IFJ2_HUMAN            | Eukaryotic translation initiation factor 5                                        | 91                         | 49182              | 5.41            | 8                            | 3                                        | 3                              | 2                                          | 3                                     | 0.16                           | 0.16               |
| ARMO3_HUMAN           | Leu1 domain-containing protein ARMO3                                              | 91                         | 91704              | 5.83            | 8                            | 3                                        | 7                              | 3                                          | 7                                     | 0.15                           | 0.15               |
| CD166_HUMAN           | CD166 antigen                                                                     | 91                         | 65061              | 5.52            | 9                            | 5                                        | 5                              | 4                                          | 5                                     | 0.2                            | 0.29               |
| IFB5_HUMAN            | Eukaryotic translation initiation factor 2 subunit 2                              | 91                         | 38364              | 5.6             | 7                            | 5                                        | 4                              | 3                                          | 4                                     | 0.2                            | 0.38               |
| CRK_HUMAN             | Adaptor molecule crk                                                              | 91                         | 33810              | 5.38            | 1                            | 1                                        | 1                              | 1                                          | 1                                     | 0.06                           | 0.1                |
| GRPL_HUMAN            | Granulein                                                                         | 91                         | 63000              | 6.43            | 6                            | 3                                        | 4                              | 2                                          | 4                                     | 0.11                           | 0.22               |
| SRRP3_HUMAN           | Signal recognition particle 9 kDa protein                                         | 91                         | 10105              | 7.77            | 2                            | 2                                        | 1                              | 1                                          | 1                                     | 0.12                           | 0.48               |
| UMPF_HUMAN            | Uridine 5'-monophosphate synthase                                                 | 90                         | 52189              | 6.81            | 4                            | 3                                        | 3                              | 2                                          | 3                                     | 0.09                           | 0.17               |
| RGS2_HUMAN            | G12A GTPase-1, no rhodopsin protein                                               | 90                         | 60531              | 8.27            | 6                            | 4                                        | 4                              | 3                                          | 4                                     | 0.14                           | 0.23               |
| FRH_HUMAN             | Ferritin heavy chain                                                              | 90                         | 21212              | 5.3             | 12                           | 4                                        | 8                              | 3                                          | 8                                     | 0.7                            | 0.79               |
| NRD91_HUMAN           | Protein NRD91                                                                     | 90                         | 42808              | 5.49            | 6                            | 3                                        | 6                              | 3                                          | 6                                     | 0.24                           | 0.34               |
| RL13_HUMAN            | GSS domain protein L13                                                            | 89                         | 24247              | 11.45           | 11                           | 4                                        | 6                              | 2                                          | 6                                     | 0.27                           | 0.41               |
| HEXB_HUMAN            | Beta-hexosaminidase subunit beta                                                  | 89                         | 63071              | 6.29            | 15                           | 5                                        | 10                             | 4                                          | 10                                    | 0.26                           | 0.3                |
| SGT2_HUMAN            | Small glutamine-rich tetratricopeptide repeat-containing protein beta             | 89                         | 33408              | 4.8             | 3                            | 2                                        | 2                              | 2                                          | 2                                     | 0.17                           | 0.26               |
| HNRL2_HUMAN           | Heterogeneous nuclear ribonucleoprotein L2-like protein 2                         | 88                         | 85052              | 4.85            | 8                            | 3                                        | 6                              | 1                                          | 6                                     | 0.17                           | 0.05               |
| ERO1A_HUMAN           | ERO1-like protein alpha                                                           | 88                         | 54358              | 5.48            | 6                            | 2                                        | 6                              | 2                                          | 4                                     | 0.24                           | 0.17               |
| STRA2_HUMAN           | Indolecarbinol-5-O-methyltransferase                                              | 88                         | 112179             | 6.78            | 6                            | 3                                        | 5                              | 2                                          | 5                                     | 0.12                           | 0.06               |
| MMS19_HUMAN           | MMS19 nucleotide excision repair protein homolog                                  | 88                         | 113217             | 5.92            | 5                            | 2                                        | 5                              | 2                                          | 5                                     | 0.11                           | 0.08               |
| PCNA_HUMAN            | Proliferating cell nuclear antigen                                                | 87                         | 28750              | 4.57            | 9                            | 4                                        | 5                              | 2                                          | 5                                     | 0.42                           | 0.33               |
| TOM1_HUMAN            | Target of Mitochondrial protein 1                                                 | 87                         | 53785              | 4.59            | 10                           | 3                                        | 6                              | 2                                          | 6                                     | 0.29                           | 0.17               |
| PGC1L_HUMAN           | Membrane-associated progesterone receptor component 1                             | 87                         | 21658              | 4.56            | 3                            | 3                                        | 1                              | 1                                          | 1                                     | 0.12                           | 0.21               |
| S10A6_HUMAN           | Protein S100-A16                                                                  | 87                         | 11784              | 6.38            | 7                            | 2                                        | 4                              | 2                                          | 4                                     | 0.53                           | 1                  |
| COM1L_HUMAN           | COM1 domain-containing protein 1                                                  | 87                         | 21165              | 5.85            | 2                            | 2                                        | 2                              | 2                                          | 2                                     | 0.15                           | 0.48               |
| HP1_HUMAN             | Huntingtin-interacting protein 1                                                  | 87                         | 116148             | 5.2             | 11                           | 3                                        | 5                              | 1                                          | 5                                     | 0.11                           | 0.04               |
| XPOT_HUMAN            | Exportin                                                                          | 86                         | 123306             | 5.11            | 17                           | 5                                        | 10                             | 3                                          | 10                                    | 0.16                           | 0.11               |
| OPN1L1_HUMAN          | Opn1-1                                                                            | 86                         | 59022              | 5.52            | 5                            | 4                                        | 3                              | 3                                          | 3                                     | 0.11                           | 0.24               |
| KC1_HUMAN             | UMP-CMP kinase                                                                    | 86                         | 22208              | 5.44            | 8                            | 6                                        | 5                              | 4                                          | 5                                     | 0.3                            | 1.1                |
| GRB1_HUMAN            | Guanine nucleotide-binding protein subunit alpha-11                               | 86                         | 42097              | 5.51            | 5                            | 3                                        | 2                              | 2                                          | 2                                     | 0.2                            | 0.35               |
| HEBP1_HUMAN           | Heme-binding protein 1                                                            | 86                         | 21084              | 5.71            | 2                            | 1                                        | 2                              | 1                                          | 2                                     | 0.15                           | 0.22               |
| HEXA_HUMAN            | Beta-hexosaminidase subunit alpha                                                 | 85                         | 68864              | 5.64            | 8                            | 4                                        | 5                              | 2                                          | 5                                     | 0.12                           | 0.15               |
| SCDH_HUMAN            | Succinate dehydrogenase (SDH), mitochondrial                                      | 85                         | 24735              | 8.35            | 6                            | 2                                        | 3                              | 2                                          | 3                                     | 0.25                           | 0.4                |
| EP150_HUMAN           | Epidermal growth factor receptor substrate 15-kDa 1                               | 84                         | 94197              | 4.93            | 4                            | 3                                        | 4                              | 3                                          | 4                                     | 0.1                            | 0.14               |
| CA19A_HUMAN           | Uncharacterized protein C10orf19                                                  | 84                         | 36324              | 5.6             | 6                            | 5                                        | 2                              | 2                                          | 2                                     | 0.15                           | 0.26               |
| SULF1_HUMAN           | Extracellular sulfatase SULF1                                                     | 83                         | 100862             | 9.23            | 8                            | 4                                        | 5                              | 1                                          | 5                                     | 0.14                           | 0.04               |
| MAT2B_HUMAN           | Methionine adenosyltransferase 2 subunit beta                                     | 83                         | 37328              | 6.9             | 3                            | 2                                        | 2                              | 2                                          | 2                                     | 0.16                           | 0.12               |
| BRCA1_HUMAN           | BRCA1                                                                             | 83                         | 118460             | 6.88            | 5                            | 3                                        | 4                              | 1                                          | 4                                     | 0.06                           | 0.07               |
| TRF2_HUMAN            | E3 ubiquitin/SCG15 ligase TRF2                                                    | 82                         | 70928              | 8.44            | 5                            | 4                                        | 3                              | 2                                          | 3                                     | 0.11                           | 0.12               |
| STAT3_HUMAN           | Signal transducer and activator of transcription 3                                | 82                         | 88511              | 5.54            | 9                            | 3                                        | 8                              | 1                                          | 8                                     | 0.16                           | 0.1                |
| DBNL_HUMAN            | Ordn-1-like protein                                                               | 82                         | 40178              | 5.02            | 9                            | 3                                        | 6                              | 3                                          | 6                                     | 0.18                           | 0.3                |
| TFPI1_HUMAN           | Transcription intermediary factor 1-beta                                          | 82                         | 88493              | 5.52            | 12                           | 4                                        | 8                              | 3                                          | 8                                     | 0.21                           | 0.15               |
| PSMD9_HUMAN           | 26S proteasome non-ATPase regulatory subunit 5                                    | 82                         | 56160              | 5.35            | 3                            | 3                                        | 3                              | 2                                          | 3                                     | 0.1                            | 0.25               |
| GLB1L_HUMAN           | 1,4-alpha-glucosidase branching enzyme                                            | 82                         | 80423              | 5.87            | 17                           | 5                                        | 8                              | 2                                          | 8                                     | 0.17                           | 0.11               |
| ITAT1_HUMAN           | Integrin alpha-11                                                                 | 81                         | 133386             | 6.24            | 15                           | 2                                        | 11                             | 2                                          | 11                                    | 0.15                           | 0.06               |
| RLB1_HUMAN            | GSS domain protein L29                                                            | 81                         | 17141              | 11.66           | 16                           | 5                                        | 2                              | 1                                          | 2                                     | 0.17                           | 0.26               |
| STM2L2_HUMAN          | Stomat-1-like protein 2, mitochondrial                                            | 81                         | 38510              | 6.88            | 9                            | 5                                        | 6                              | 2                                          | 6                                     | 0.35                           | 0.24               |
| CSPT2_HUMAN           | Vesicular core protein                                                            | 81                         | 372590             | 4.43            | 19                           | 4                                        | 14                             | 3                                          | 14                                    | 0.07                           | 0.03               |
| DTD1_HUMAN            | D-aminooxy-L-histidine decarboxylase 1                                            | 80                         | 23409              | 8.35            | 8                            | 4                                        | 4                              | 3                                          | 4                                     | 0.35                           | 0.7                |
| PROX3_HUMAN           | Thioredoxin-dependent peroxide reductase, mitochondrial                           | 80                         | 27675              | 7.67            | 7                            | 2                                        | 6                              | 2                                          | 6                                     | 0.34                           | 0.35               |
| USMG3_HUMAN           | Ubiquitin-regulated during skeletal muscle growth protein 3                       | 80                         | 6453               | 9.19            | 2                            | 2                                        | 1                              | 2                                          | 1                                     | 0.25                           | 0.85               |
| AIMP2_HUMAN           | Aminoglycyl tRNA synthetase complex-interacting multifunctional protein 2         | 80                         | 35326              | 8.45            | 11                           | 5                                        | 5                              | 3                                          | 5                                     | 0.3                            | 0.42               |
| PXN_HUMAN             | Peroxidase homolog                                                                | 80                         | 165170             | 6.79            | 8                            | 4                                        | 7                              | 4                                          | 7                                     | 0.09                           | 0.11               |
| AMM1_HUMAN            | Protein arginine N-methyltransferase 1                                            | 80                         | 41488              | 5.24            | 6                            | 4                                        | 6                              | 4                                          | 6                                     | 0.25                           | 0.48               |
| EF1A_HUMAN            | Elongation factor 1a, mitochondrial                                               | 79                         | 49510              | 7.26            | 7                            | 4                                        | 5                              | 4                                          | 5                                     | 0.24                           | 0.4                |
| PST1_HUMAN            | Pernicious anemia suppressor factor 19                                            | 79                         | 32766              | 4.26            | 3                            | 3                                        | 2                              | 2                                          | 2                                     | 0.17                           | 0.46               |
| STX1_HUMAN            | Syntaxin-7                                                                        | 79                         | 29797              | 5.41            | 5                            | 3                                        | 3                              | 3                                          | 3                                     | 0.22                           | 0.52               |
| ZAB2_HUMAN            | Serine/threonine-protein phosphatase 2A 55 kDa regulatory subunit B alpha isoform | 78                         | 51659              | 5.82            | 8                            | 3                                        | 6                              | 2                                          | 6                                     | 0.25                           | 0.18               |
| ACAD9_HUMAN           | New long-chain specific acyl-CoA dehydrogenase, mitochondrial                     | 78                         | 70345              | 8.97            | 8                            | 5                                        | 8                              | 5                                          | 8                                     | 0.23                           | 0.35               |
| RTGA_HUMAN            | RNA 3'-terminal phosphate cyclase                                                 | 76                         | 39311              | 8.01            | 2                            | 2                                        | 2                              | 2                                          | 2                                     | 0.11                           | 0.24               |
| NUCB1_HUMAN           | Nucleobindin-1                                                                    | 77                         | 53846              | 5.15            | 10                           | 3                                        | 8                              | 3                                          | 8                                     | 0.22                           | 0.28               |
| MORF1_HUMAN           | Multiple isoform polyporphosphate phosphatase 1                                   | 77                         | 55016              | 7.93            | 2                            | 1                                        | 3                              | 1                                          | 3                                     | 0.11                           | 0.08               |
| PAPR4_HUMAN           | Poly (ADP-ribose) polymerase 4                                                    | 77                         | 192472             | 5.43            | 2                            | 2                                        | 2                              | 2                                          | 2                                     | 0.03                           | 0.04               |
| MPV17_HUMAN           | Protein MPV17                                                                     | 77                         | 19720              | 9.54            | 2                            | 2                                        | 1                              | 1                                          | 1                                     | 0.13                           | 0.23               |
| TALDO2_HUMAN          | Transaldolase                                                                     | 77                         | 37516              | 6.36            | 8                            | 5                                        | 7                              | 4                                          | 7                                     | 0.24                           | 0.58               |
| FKBP3_HUMAN           | Peptidyl-Hsp70 cis-trans isomerase FKBP3                                          | 76                         | 25161              | 9.29            | 4                            | 4                                        | 2                              | 2                                          | 2                                     | 0.18                           | 0.39               |
| STC4_HUMAN            | Serine/threonine-protein kinase 24                                                | 76                         | 49277              | 5.49            | 4                            | 2                                        | 3                              | 2                                          | 3                                     | 0.12                           | 0.18               |
| CD63_HUMAN            | CD63 antigen                                                                      | 76                         | 25619              | 8.14            | 10                           | 5                                        | 4                              | 2                                          | 4                                     | 0.2                            | 0.62               |
| SHC1_HUMAN            | Sorting nexin-1                                                                   | 76                         | 46620              | 5.81            | 7                            | 3                                        | 5                              | 3                                          | 5                                     | 0.24                           | 0.31               |
| NOPR_HUMAN            | NAD(P)+-cytochrome P450 reductase                                                 | 76                         | 76841              | 5.38            | 4                            | 2                                        | 3                              | 1                                          | 3                                     | 0.09                           | 0.06               |
| IVD_HUMAN             | Isovaleryl-CoA dehydrogenase, mitochondrial                                       | 76                         | 46290              | 8.45            | 2                            | 1                                        | 2                              | 1                                          | 2                                     | 0.09                           | 0.09               |
| QSOX1_HUMAN           | Glutathione S-transferase kappa 1                                                 | 76                         | 25480              | 8.5             | 8                            | 6                                        | 5                              | 5                                          | 5                                     | 0.42                           | 1.25               |
| S12AL_HUMAN           | Sickle cell carrier family 12 member 4                                            | 76                         | 120572             | 6.02            | 4                            | 2                                        | 3                              | 1                                          | 3                                     | 0.05                           | 0.04               |
| UBAL2_HUMAN           | Ubiquitin-like modifier-activating enzyme 6                                       | 75                         | 117895             | 5.76            | 8                            | 5                                        | 6                              | 3                                          | 6                                     | 0.09                           | 0.11               |
| SERC1_HUMAN           | Serine incorporator 1                                                             | 75                         | 50461              | 5.59            | 2                            | 1                                        | 2                              | 1                                          | 2                                     | 0.06                           | 0.09               |
| ASAH1_HUMAN           | Acid ceramidase                                                                   | 74                         | 44631              | 7.52            | 5                            | 2                                        | 4                              | 2                                          | 4                                     | 0.23                           | 0.21               |
| KAD1_HUMAN            | Adipocyte kinase isoenzyme 1                                                      | 74                         | 21621              | 8.73            | 8                            | 3                                        | 4                              | 2                                          | 4                                     | 0.34                           | 0.46               |
| VAT1L_HUMAN           | V-type proton ATPase 16 kDa proteolipid subunit                                   | 74                         | 15725              | 7.88            | 1                            | 1                                        | 1                              | 1                                          | 1                                     | 0.2                            | 0.3                |
| SVK_HUMAN             | Lysine-epsilon-lysine ligase                                                      | 73                         | 68005              | 5.94            | 7                            | 6                                        | 5                              | 4                                          | 5                                     | 0.16                           | 0.28               |
| RRA5_HUMAN            | Rham-1-like protein RRA5                                                          | 73                         | 23468              | 6.43            | 9                            | 4                                        | 7                              | 3                                          | 7                                     | 0.57                           | 0.7                |
| JIP4_HUMAN            | C-Jun-amino-terminal kinase-interacting protein 4                                 | 73                         | 146115             | 5.05            | 8                            | 2                                        | 6                              | 2                                          | 6                                     | 0.1                            | 0.06               |
| TF2F_HUMAN            | Twinfilin-2                                                                       | 73                         | 39523              | 6.37            | 6                            | 4                                        | 4                              | 2                                          | 4                                     | 0.21                           | 0.23               |
| FAM8A_HUMAN           | Protein FAM8A                                                                     | 73                         | 55366              | 9.15            | 13                           | 3                                        | 5                              | 2                                          | 4                                     | 0.16                           | 0.16               |
| ILVBL_HUMAN           | Acetabactate synthase-like protein                                                | 73                         | 67825              | 8.43            | 12                           | 6                                        | 7                              | 4                                          | 7                                     | 0.24                           | 0.28               |
| ELAF2_HUMAN           | Interferon-gamma-induced, double-stranded RNA-activated protein kinase            | 73                         | 62558              | 8.58            | 1                            | 1                                        | 1                              | 1                                          | 1                                     | 0.02                           | 0.02               |
| DBST_HUMAN            | DbpA homolog subfamily B member 12                                                | 72                         | 41793              | 8.67            | 5                            | 2                                        | 3                              | 1                                          | 3                                     | 0.13                           | 0.1                |
| OSR1_HUMAN            | Serine/threonine-protein kinase OSR1                                              | 72                         | 57886              | 6.03            | 5                            | 3                                        | 3                              | 3                                          | 3                                     | 0.17                           | 0.24               |
| STG2_HUMAN            | Glutamine-5-O-methyltransferase                                                   | 72                         | 67743              | 6.71            | 8                            | 3                                        | 5                              | 2                                          | 5                                     | 0.1                            | 0.1                |
| AAAT1_HUMAN           | Neutral amino acid transporter B00                                                | 72                         | 56562              | 5.34            | 3                            | 3                                        | 3                              | 3                                          | 3                                     | 0.11                           | 0.25               |
| GRG3_HUMAN            | N-acetylglucosamine-6-sulfatase                                                   | 72                         | 62042              | 6.48            | 7                            | 2                                        | 5                              | 2                                          | 5                                     | 0.16                           | 0.14               |
| TBC2_HUMAN            | Tubulin-specific chaperone E                                                      | 72                         | 59208              | 6.22            | 6                            | 3                                        | 5                              | 2                                          | 4                                     | 0.16                           | 0.15               |
| CARM1_HUMAN           | Histone-arginine methyltransferase CARM1                                          | 72                         | 65811              | 6.25            | 9                            | 5                                        | 6                              | 3                                          | 6                                     | 0.19                           | 0.21               |
| COX8B_HUMAN           | Cytochrome c oxidase subunit 8B, mitochondrial                                    | 72                         | 29467              | 6.89            | 2                            | 2                                        | 1                              | 1                                          | 1                                     | 0.09                           | 0.15               |
| NETJ1_HUMAN           | Oncoap-1-related NET2                                                             | 71                         | 30589              | 6.82            | 6                            | 4                                        | 4                              | 3                                          | 4                                     | 0.29                           | 0.5                |
| AK1A1_HUMAN           | Alcohol dehydrogenase [NAD(P)+]                                                   | 71                         | 36550              | 6.32            | 11                           | 7                                        | 7                              | 5                                          | 7                                     | 0.36                           | 0.77               |
| T12EA_HUMAN           | Transmembrane protein 12EA                                                        | 71                         | 21513              | 9.36            | 4                            | 2                                        | 3                              | 1                                          | 3                                     | 0.36                           | 0.21               |
| RWD1_HUMAN            | RWD domain-containing protein 1                                                   | 71                         | 27922              | 4.11            | 3                            | 3                                        | 2                              | 2                                          | 2                                     | 0.23                           | 0.34               |
| TRF_HUMAN             | Transferin receptor protein 1                                                     | 71                         | 84818              | 6.18            | 12                           | 6                                        | 8                              | 4                                          | 8                                     | 0.19                           | 0.22               |
| BGLA_HUMAN            | Beta-glactosidase                                                                 | 70                         | 78027              | 6.1             | 9                            | 4                                        | 8                              | 4                                          | 8                                     | 0.14                           | 0.18               |

<sup>a</sup>Protein score is calculated from the score of the peptide attributed to the protein.

<sup>b</sup>pI is (Predicted) isoelectric point.

<sup>c</sup>Number of matches is spectrum number matched to protein<sup>1</sup>.

<sup>d</sup>Number of significant matches is spectrum number that matches protein and exceeds the identification criteria.

<sup>e</sup>Number of sequences is number of peptides matched to protein<sup>1</sup>.

<sup>f</sup>Number of significant sequences is number of peptides exceeding the identification criteria matched to proteins.

<sup>g</sup>Number of unique sequences is a unique<sup>1</sup> number of peptides matched to proteins.

<sup>h</sup>Sequence coverage is the ratio of the total number of matched peptide residues to the total length of the protein.

<sup>i</sup>Exponentially Modified Protein Abundance Index ([http://www.matrixscience.com/help/quant\\_help.html](http://www.matrixscience.com/help/quant_help.html)).

Table S2, Cont'd.

| UniProt/Swiss-<br>PROT ID | Description                                                                  | Protein<br>mass (kDa) | pI <sup>a</sup> | Num. of<br>matches <sup>b</sup> | Num. of significant<br>matches <sup>c</sup> | Num. of<br>sequences <sup>d</sup> | Num. of significant<br>sequences <sup>e</sup> | Num. of unique<br>sequences <sup>f</sup> | Sequence<br>coverage <sup>g</sup> | emPAI <sup>h</sup> |
|---------------------------|------------------------------------------------------------------------------|-----------------------|-----------------|---------------------------------|---------------------------------------------|-----------------------------------|-----------------------------------------------|------------------------------------------|-----------------------------------|--------------------|
| GSTF1_HUMAN               | G-kinase stimulation factor subunit 2 (tau variant)                          | 70                    | 6.79            | 5                               | 2                                           | 1                                 | 1                                             | 1                                        | 0.15                              | 0.97               |
| SAMEL2_HUMAN              | Sorting and assembly machinery component 50 homolog                          | 70                    | 5.193           | 6.44                            | 3                                           | 2                                 | 3                                             | 2                                        | 0.14                              | 0.17               |
| ASPL1_HUMAN               | Aspartyl (neuraminid) sialinohydrolase                                       | 70                    | 8.809           | 4.92                            | 3                                           | 1                                 | 3                                             | 1                                        | 0.07                              | 0.05               |
| QTM2L_HUMAN               | Glutathione S-transferase 3                                                  | 70                    | 2554.3          | 7                               | 2                                           | 2                                 | 2                                             | 2                                        | 0.14                              | 0.37               |
| MPRL_HUMAN                | Cation-independent mannose-6-phosphate receptor                              | 70                    | 274199          | 5.84                            | 16                                          | 2                                 | 13                                            | 1                                        | 0.1                               | 0.02               |
| EEA1_HUMAN                | Early endosome antigen 1                                                     | 70                    | 102367          | 5.55                            | 14                                          | 4                                 | 13                                            | 4                                        | 0.17                              | 0.11               |
| ATB1L_HUMAN               | Plasma membrane calcium-transporting ATPase 1                                | 69                    | 136868          | 5.73                            | 8                                           | 3                                 | 6                                             | 2                                        | 0.09                              | 0.06               |
| ROA2L_HUMAN               | Heterogeneous nuclear ribonucleoprotein A0                                   | 69                    | 20822           | 8.34                            | 4                                           | 2                                 | 4                                             | 2                                        | 0.25                              | 0.31               |
| LED2L_HUMAN               | Gelsolin-2                                                                   | 69                    | 26136           | 6.57                            | 12                                          | 3                                 | 7                                             | 2                                        | 0.05                              | 0.37               |
| HRNPCL_HUMAN              | Heterogeneous nuclear ribonucleoprotein D0                                   | 69                    | 38410           | 7.82                            | 10                                          | 6                                 | 4                                             | 3                                        | 0.13                              | 0.38               |
| EIF3H_HUMAN               | Eukaryotic translation initiation factor 3 subunit H                         | 69                    | 39905           | 6.09                            | 3                                           | 3                                 | 3                                             | 3                                        | 0.17                              | 0.37               |
| RAB1L1_HUMAN              | Rab1-related protein Rab1-13                                                 | 69                    | 22100           | 8.27                            | 5                                           | 1                                 | 4                                             | 1                                        | 0.28                              | 0.2                |
| MMF2_HUMAN                | 72 kDa type IV collagenase                                                   | 68                    | 73835           | 5.26                            | 5                                           | 3                                 | 2                                             | 1                                        | 0.09                              | 0.06               |
| CUTL1_HUMAN               | Protein Cutl1                                                                | 68                    | 19104           | 5.42                            | 6                                           | 1                                 | 6                                             | 1                                        | 0.48                              | 0.24               |
| RAB21_HUMAN               | Rab2-related protein Rab2-21                                                 | 68                    | 24202           | 8.11                            | 5                                           | 1                                 | 4                                             | 1                                        | 0.28                              | 0.19               |
| XPO1_HUMAN                | Exportin-1                                                                   | 68                    | 10893           | 5.24                            | 11                                          | 2                                 | 9                                             | 2                                        | 0.17                              | 0.08               |
| OPN2L_HUMAN               | Opn2-related                                                                 | 68                    | 60092           | 5.8                             | 6                                           | 4                                 | 3                                             | 5                                        | 0.2                               | 0.23               |
| MYADM1_HUMAN              | Myeloid-associated differentiation marker                                    | 68                    | 35250           | 8.53                            | 3                                           | 2                                 | 1                                             | 1                                        | 0.07                              | 0.12               |
| VAT1L_HUMAN               | V-type proton ATPase subunit H                                               | 67                    | 55847           | 6.07                            | 7                                           | 2                                 | 7                                             | 2                                        | 0.29                              | 0.16               |
| NCO1_HUMAN                | Neocytin                                                                     | 67                    | 78292           | 5.87                            | 6                                           | 3                                 | 4                                             | 1                                        | 0.1                               | 0.05               |
| OXFA2L_HUMAN              | Oxidochrome c oxidase subunit FA2, mitochondrial                             | 67                    | 9390            | 8.75                            | 3                                           | 1                                 | 2                                             | 1                                        | 0.45                              | 0.53               |
| IPOT1_HUMAN               | Importin-8                                                                   | 67                    | 115889          | 4.71                            | 3                                           | 2                                 | 3                                             | 2                                        | 0.06                              | 0.07               |
| INF2_HUMAN                | Inverted formin-2                                                            | 67                    | 135540          | 5.26                            | 7                                           | 3                                 | 6                                             | 3                                        | 0.11                              | 0.1                |
| KOD12_HUMAN               | BTB/POZ domain-containing protein KOD12                                      | 67                    | 35679           | 5.51                            | 4                                           | 2                                 | 4                                             | 2                                        | 0.25                              | 0.26               |
| BSOP1L_HUMAN              | Radii GTPase-activating protein (neuraminidase) subunit                      | 67                    | 155886          | 5.4                             | 9                                           | 3                                 | 9                                             | 3                                        | 0.13                              | 0.08               |
| KAT2L_HUMAN               | Adenylate kinase 2, mitochondrial                                            | 67                    | 26461           | 7.67                            | 3                                           | 2                                 | 2                                             | 1                                        | 0.16                              | 0.17               |
| HUNE1_HUMAN               | E3 ubiquitin-protein ligase HUNE1                                            | 67                    | 481589          | 5.1                             | 19                                          | 4                                 | 18                                            | 4                                        | 0.07                              | 0.03               |
| MPK3L_HUMAN               | Dual specificity mitogen-activated protein kinase kinase 3                   | 66                    | 39293           | 7.05                            | 2                                           | 4                                 | 1                                             | 4                                        | 0.21                              | 0.11               |
| PPIL4_HUMAN               | Peptidyl-prolyl cis-trans isomerase-like 4                                   | 66                    | 57189           | 5.83                            | 3                                           | 2                                 | 2                                             | 2                                        | 0.11                              | 0.16               |
| VPS35L_HUMAN              | Vacuolar protein sorting-associated protein 35                               | 66                    | 20735           | 5.97                            | 3                                           | 2                                 | 2                                             | 2                                        | 0.28                              | 0.49               |
| NDUAA_HUMAN               | NADH dehydrogenase (ubiquinone) 1 alpha subcomplex subunit 10, mitochondrial | 66                    | 40725           | 8.67                            | 4                                           | 3                                 | 3                                             | 3                                        | 0.16                              | 0.36               |
| DBLON_HUMAN               | Dual homology, mitochondrial                                                 | 66                    | 27114           | 5.88                            | 3                                           | 2                                 | 1                                             | 1                                        | 0.07                              | 0.17               |
| SECISL_HUMAN              | Translation protein SECIS3 homolog                                           | 66                    | 87842           | 5.21                            | 6                                           | 4                                 | 3                                             | 2                                        | 0.29                              | 0.21               |
| TSPD_HUMAN                | Transducator protein                                                         | 66                    | 18816           | 8.43                            | 5                                           | 2                                 | 4                                             | 2                                        | 0.29                              | 0.55               |
| DLA1B_HUMAN               | Dual homology subfamily B member 4                                           | 66                    | 27182           | 6.85                            | 9                                           | 4                                 | 5                                             | 1                                        | 0.23                              | 0.38               |
| PLXB2L_HUMAN              | Plxin-82                                                                     | 65                    | 204997          | 5.85                            | 6                                           | 2                                 | 2                                             | 2                                        | 0.08                              | 0.04               |
| ACSL3L_HUMAN              | Long-chain fatty-acyl-CoA ligase 3                                           | 65                    | 80388           | 8.95                            | 3                                           | 3                                 | 2                                             | 2                                        | 0.07                              | 0.11               |
| VADN1_HUMAN               | Vannin                                                                       | 65                    | 71688           | 7.18                            | 1                                           | 1                                 | 1                                             | 1                                        | 0.02                              | 1.08               |
| PTGRL1_HUMAN              | Prostaglandin reductase 1                                                    | 65                    | 35847           | 8.45                            | 6                                           | 3                                 | 4                                             | 3                                        | 0.3                               | 0.42               |
| NACAGL_HUMAN              | Alpha-N-acetylgalactosaminidase                                              | 65                    | 48324           | 5.21                            | 4                                           | 3                                 | 4                                             | 3                                        | 0.1                               | 0.09               |
| ARFG1_HUMAN               | ADP-ribosylation factor GTPase-activating protein 1                          | 65                    | 44640           | 5.46                            | 5                                           | 3                                 | 3                                             | 3                                        | 0.15                              | 0.32               |
| TMED7_HUMAN               | Transmembrane emp24 domain-containing protein 7                              | 65                    | 25156           | 6.43                            | 13                                          | 7                                 | 8                                             | 4                                        | 0.6                               | 0.33               |
| GRM4L_HUMAN               | Glutamate receptor 4, mitochondrial                                          | 65                    | 60062           | 7.57                            | 2                                           | 2                                 | 2                                             | 2                                        | 0.1                               | 0.13               |
| LPB1_HUMAN                | Linn-1-beta-1                                                                | 64                    | 113952          | 5.4                             | 9                                           | 3                                 | 7                                             | 2                                        | 0.13                              | 0.12               |
| LTDORL_HUMAN              | Regulator complex protein LAMTOR3                                            | 64                    | 13614           | 6.73                            | 4                                           | 2                                 | 3                                             | 2                                        | 0.54                              | 0.82               |
| TBCLL_HUMAN               | Tubulin-binding collector 9                                                  | 64                    | 27058           | 5.08                            | 4                                           | 3                                 | 3                                             | 3                                        | 0.35                              | 0.25               |
| FAM8B_HUMAN               | Protein FAM8B                                                                | 64                    | 37167           | 5.96                            | 3                                           | 2                                 | 3                                             | 2                                        | 0.17                              | 0.25               |
| IFTF1_HUMAN               | Eukaryotic translation initiation factor 5B                                  | 64                    | 128142          | 5.39                            | 7                                           | 1                                 | 3                                             | 0                                        | 0.29                              | 0.20               |
| GBP1_HUMAN                | Guanidylate-binding protein 1                                                | 64                    | 67888           | 5.57                            | 4                                           | 2                                 | 4                                             | 2                                        | 0.13                              | 0.13               |
| SP16L_HUMAN               | FACT complex subunit SPT16                                                   | 64                    | 119338          | 5.5                             | 6                                           | 3                                 | 4                                             | 1                                        | 0.07                              | 0.04               |
| SSBP1_HUMAN               | Single-strand-DNA-binding protein, mitochondrial                             | 64                    | 17249           | 8.59                            | 3                                           | 2                                 | 2                                             | 2                                        | 0.32                              | 0.61               |
| GSTF1L_HUMAN              | Oxidoreductase-stimulating factor 1                                          | 64                    | 23772           | 5.46                            | 1                                           | 1                                 | 1                                             | 1                                        | 0.06                              | 0.19               |
| SGIP1_HUMAN               | SGGP2-binding protein                                                        | 63                    | 111007          | 5.26                            | 4                                           | 3                                 | 3                                             | 3                                        | 0.06                              | 0.08               |
| IFTT1_HUMAN               | Intraflagellar transport protein 27 homolog                                  | 63                    | 20467           | 5.28                            | 2                                           | 1                                 | 2                                             | 1                                        | 0.21                              | 0.22               |
| PURB_HUMAN                | Adenylsuccinate lyase                                                        | 63                    | 54854           | 6.89                            | 11                                          | 4                                 | 6                                             | 3                                        | 0.25                              | 0.25               |
| LPL1_HUMAN                | E3 UBR1-protein ligase 1                                                     | 63                    | 89540           | 6.35                            | 7                                           | 3                                 | 6                                             | 2                                        | 0.17                              | 0.1                |
| RAVRI1_HUMAN              | Ribonucleoprotein PTB-binding 1                                              | 63                    | 83837           | 8.78                            | 3                                           | 2                                 | 1                                             | 1                                        | 0.05                              | 0.14               |
| THL1_HUMAN                | Acetyl-CoA acetyltransferase, mitochondrial                                  | 63                    | 45171           | 6.98                            | 2                                           | 1                                 | 1                                             | 1                                        | 0.04                              | 0.1                |
| DOL1L_HUMAN               | Oxidation domain 1 lig1 intermediate chain 2                                 | 63                    | 54086           | 5.97                            | 6                                           | 2                                 | 5                                             | 2                                        | 0.14                              | 0.17               |
| SEM1A_HUMAN               | Semaphorin-7A                                                                | 63                    | 74776           | 7.57                            | 2                                           | 1                                 | 1                                             | 1                                        | 0.05                              | 0.06               |
| OPN2L_HUMAN               | Gelsolin-2                                                                   | 63                    | 63895           | 5.29                            | 6                                           | 2                                 | 5                                             | 2                                        | 0.16                              | 0.14               |
| LMNA_HUMAN                | Protein-A/C                                                                  | 63                    | 74095           | 6.57                            | 7                                           | 3                                 | 6                                             | 3                                        | 0.17                              | 0.18               |
| LMF2L_HUMAN               | Lesch-Nyhan factor 2                                                         | 63                    | 79647           | 10.1                            | 4                                           | 3                                 | 2                                             | 3                                        | 0.08                              | 0.11               |
| STAT2L_HUMAN              | Signal transducer and activator of transcription 2                           | 63                    | 9785            | 5.34                            | 6                                           | 2                                 | 5                                             | 1                                        | 0.09                              | 0.04               |
| RL1L_HUMAN                | 60S ribosomal protein L14                                                    | 62                    | 23417           | 10.94                           | 11                                          | 5                                 | 6                                             | 3                                        | 0.28                              | 0.7                |
| CDP1_HUMAN                | CDP antigen                                                                  | 62                    | 25389           | 6.8                             | 3                                           | 2                                 | 2                                             | 2                                        | 0.18                              | 0.18               |
| NSBA1L_HUMAN              | Protein Nba1                                                                 | 62                    | 103070          | 4.74                            | 9                                           | 3                                 | 8                                             | 3                                        | 0.16                              | 0.13               |
| GORS1L_HUMAN              | Gdp release- and -binding protein 2                                          | 62                    | 47116           | 4.73                            | 7                                           | 3                                 | 6                                             | 3                                        | 0.25                              | 0.3                |
| SEIL1_HUMAN               | Protein seb1 homolog 1                                                       | 62                    | 8808            | 5.23                            | 3                                           | 2                                 | 2                                             | 2                                        | 0.06                              | 0.1                |
| TIGAR_HUMAN               | Fructose-2,6-bisphosphatase TIGAR                                            | 62                    | 30043           | 7.6                             | 5                                           | 3                                 | 3                                             | 3                                        | 0.24                              | 0.32               |
| MPPLA_HUMAN               | Mitochondrial processing peptidase subunit alpha                             | 61                    | 58216           | 6.45                            | 8                                           | 3                                 | 4                                             | 1                                        | 0.12                              | 0.07               |
| UBA1L_HUMAN               | Ubiquitin-like modifier-activating enzyme 7                                  | 61                    | 111624          | 5.64                            | 2                                           | 1                                 | 1                                             | 1                                        | 0.03                              | 0.04               |
| AFD3J1_HUMAN              | AF3 complex subunit delc-1                                                   | 61                    | 100078          | 8.89                            | 10                                          | 2                                 | 8                                             | 2                                        | 0.11                              | 0.07               |
| TSP1L_HUMAN               | Thrombospondin-1                                                             | 61                    | 139008          | 4.62                            | 13                                          | 4                                 | 9                                             | 2                                        | 0.12                              | 0.07               |
| BTF3L_HUMAN               | Transcription factor BTF3                                                    | 61                    | 22154           | 8.41                            | 7                                           | 3                                 | 4                                             | 1                                        | 0.24                              | 0.2                |
| REL1_HUMAN                | Len protease homolog, mitochondrial                                          | 61                    | 106422          | 6.01                            | 6                                           | 3                                 | 4                                             | 1                                        | 0.08                              | 0.04               |
| PRE1_HUMAN                | Farnesyl beta-chase                                                          | 61                    | 20007           | 5.51                            | 7                                           | 2                                 | 5                                             | 2                                        | 0.43                              | 0.51               |
| STAM1_HUMAN               | Signal transducing adapter molecule 1                                        | 60                    | 59142           | 4.7                             | 6                                           | 1                                 | 4                                             | 1                                        | 0.14                              | 0.07               |
| BBFA_HUMAN                | Bik-like protein 4                                                           | 60                    | 33407           | 6.06                            | 7                                           | 2                                 | 5                                             | 2                                        | 0.24                              | 0.28               |
| SHNA_HUMAN                | Alpha-subunit NSF attachment protein                                         | 60                    | 33211           | 5.23                            | 6                                           | 5                                 | 4                                             | 4                                        | 0.2                               | 0.85               |
| APMAP_HUMAN               | Adipocyte plasma membrane-associated protein                                 | 60                    | 44851           | 5.82                            | 9                                           | 3                                 | 6                                             | 2                                        | 0.25                              | 0.2                |
| ACONL_HUMAN               | Acetate hydratase, mitochondrial                                             | 60                    | 65372           | 7.36                            | 3                                           | 1                                 | 3                                             | 1                                        | 0.08                              | 0.05               |
| ARFG1_HUMAN               | ADP-ribosylation factor GTPase-activating protein 3                          | 60                    | 58893           | 7.04                            | 4                                           | 2                                 | 4                                             | 2                                        | 0.13                              | 0.16               |
| GGH2L_HUMAN               | Gln:Glu-cysteine ligase regulatory subunit                                   | 60                    | 30788           | 5.89                            | 2                                           | 1                                 | 2                                             | 1                                        | 0.19                              | 0.14               |
| FOXC4L_HUMAN              | Foxo4-related                                                                | 60                    | 19844           | 6.17                            | 7                                           | 3                                 | 6                                             | 2                                        | 0.07                              | 0.04               |
| TTG2L_HUMAN               | Tetratricopeptide repeat protein 37                                          | 60                    | 175375          | 7.47                            | 10                                          | 1                                 | 9                                             | 1                                        | 0.01                              | 0.02               |
| POSD1L_HUMAN              | POS proteasome non-ATPase regulatory subunit 8                               | 60                    | 39507           | 6.73                            | 9                                           | 2                                 | 7                                             | 2                                        | 0.23                              | 0.23               |
| PREP1_HUMAN               | Presequence protease, mitochondrial                                          | 60                    | 117338          | 6.45                            | 9                                           | 1                                 | 8                                             | 1                                        | 0.13                              | 0.04               |
| CENT2_HUMAN               | Centrin-2                                                                    | 60                    | 10726           | 4.91                            | 5                                           | 1                                 | 4                                             | 1                                        | 0.45                              | 0.23               |
| POSD1L_HUMAN              | POS proteasome non-ATPase regulatory subunit 6                               | 60                    | 45002           | 5.45                            | 4                                           | 2                                 | 4                                             | 2                                        | 0.14                              | 0.2                |
| ACAD9L_HUMAN              | Medium-chain specific acyl-CoA dehydrogenase, mitochondrial                  | 60                    | 46559           | 8.61                            | 3                                           | 2                                 | 2                                             | 2                                        | 0.13                              | 0.09               |
| PHOCOL_HUMAN              | MDM-like protein phocin                                                      | 60                    | 26016           | 5.5                             | 6                                           | 3                                 | 4                                             | 2                                        | 0.22                              | 0.26               |
| ECI1_HUMAN                | Enoyl-CoA delta isomerase 1, mitochondrial                                   | 60                    | 32785           | 8.8                             | 5                                           | 2                                 | 3                                             | 2                                        | 0.23                              | 0.29               |
| APX1L_HUMAN               | DNA-topoisomerase or apyrimidic site lyase                                   | 60                    | 35522           | 8.33                            | 7                                           | 1                                 | 6                                             | 1                                        | 0.26                              | 0.12               |
| OLP1L_HUMAN               | OGG1-like domain-containing linker protein 1                                 | 59                    | 162147          | 5.26                            | 14                                          | 3                                 | 11                                            | 2                                        | 0.13                              | 0.05               |
| GREM1_HUMAN               | Grem1-1                                                                      | 59                    | 20683           | 8.53                            | 3                                           | 3                                 | 2                                             | 2                                        | 0.17                              | 0.49               |
| PPD1L_HUMAN               | Peptidyl-prolyl cis-trans isomerase D                                        | 59                    | 40736           | 6.77                            | 2                                           | 1                                 | 2                                             | 1                                        | 0.07                              | 0.11               |
| ATP1L_HUMAN               | ATP synthase-coupling factor 6, mitochondrial                                | 59                    | 12580           | 5.2                             | 3                                           | 2                                 | 2                                             | 2                                        | 0.40                              | 0.81               |
| WDFY1L_HUMAN              | WD repeat and FYVE domain-containing protein 1                               | 53                    | 46293           | 6.99                            | 2                                           | 2                                 | 2                                             | 2                                        | 0.13                              | 0.2                |
| NRP1_HUMAN                | Neurexin-1                                                                   | 59                    | 120369          | 5.58                            | 2                                           | 1                                 | 2                                             | 1                                        | 0.04                              | 0.04               |

<sup>a</sup>Protein score is calculated from the score of the peptide attributed to the protein.

<sup>b</sup>Is (Predicted) isoelectric point.

<sup>c</sup>Number of matches is spectrum number matched to protein<sup>14</sup>.

<sup>d</sup>Number of significant matches is spectrum number that matches protein and exceeds the identification criteria.

<sup>e</sup>Number of sequences is number of peptides matched to protein<sup>12</sup>.

<sup>f</sup>Number of significant sequences is number of peptides exceeding the identification criteria matched to proteins.

<sup>g</sup>Number of unique sequences is a unique number of peptides matched to proteins.

<sup>h</sup>Sequence coverage is the ratio of the total number of matched peptide residues to the total length of the protein.

<sup>i</sup>Exponentially Modified Protein Abundance Index ([http://www.matrixscience.com/help/quant\\_empa\\_help.html](http://www.matrixscience.com/help/quant_empa_help.html)).

Table S2. Cont'd.

| UniProt/Swiss-Prot |                                                                                                    | Protein score <sup>a</sup> | Protein mass (kDa) | pI <sup>b</sup> | Num. of matches <sup>c</sup> | Num. of significant matches <sup>d</sup> | Num. of sequences <sup>e</sup> | Num. of significant sequences <sup>f</sup> | Num. of unique sequences <sup>g</sup> | Sequence coverage <sup>h</sup> | empPA <sup>i</sup> |
|--------------------|----------------------------------------------------------------------------------------------------|----------------------------|--------------------|-----------------|------------------------------|------------------------------------------|--------------------------------|--------------------------------------------|---------------------------------------|--------------------------------|--------------------|
| PROT ID            | Description                                                                                        |                            |                    |                 |                              |                                          |                                |                                            |                                       |                                |                    |
| TENM2_HUMAN        | Tenascin-2                                                                                         | 59                         | 61.02              | 5.7             | 2                            | 2                                        | 1                              | 1                                          | 1                                     | 0.25                           | 0.17               |
| BP1_HUMAN          | Insulin-like growth factor-binding protein 7                                                       | 59                         | 29111              | 8.25            | 9                            | 3                                        | 5                              | 3                                          | 5                                     | 0.29                           | 0.53               |
| ADG_HUMAN          | Adenosine kinase                                                                                   | 59                         | 40520              | 6.24            | 5                            | 2                                        | 4                              | 2                                          | 4                                     | 0.22                           | 0.23               |
| DUS3_HUMAN         | Dual specificity protein phosphatase 3                                                             | 59                         | 20465              | 2.16            | 2                            | 1                                        | 2                              | 1                                          | 2                                     | 0.1                            | 0.22               |
| REGO1_HUMAN        | ATP-dependent DNA helicase G1                                                                      | 59                         | 73410              | 9.12            | 14                           | 4                                        | 8                              | 2                                          | 8                                     | 0.27                           | 0.12               |
| ZAS2_HUMAN         | Serine/threonine-protein phosphatase 2A 56 kDa regulatory subunit delta isoform                    | 59                         | 69947              | 5.24            | 3                            | 2                                        | 2                              | 1                                          | 2                                     | 0.06                           | 0.06               |
| TRB2_HUMAN         | 2-methylerythroid-specific thiolase, mitochondrial                                                 | 58                         | 41895              | 5.22            | 9                            | 4                                        | 8                              | 3                                          | 8                                     | 0.24                           | 0.35               |
| STX4_HUMAN         | Syntaxin-4                                                                                         | 58                         | 34159              | 5.92            | 4                            | 2                                        | 3                              | 1                                          | 3                                     | 0.2                            | 0.13               |
| UBR5_HUMAN         | Ubiquitin-conjugating enzyme E2 R2                                                                 | 58                         | 27449              | 4.26            | 6                            | 3                                        | 3                              | 1                                          | 3                                     | 0.34                           | 0.36               |
| PSB2_HUMAN         | Proteasome subunit beta type-2                                                                     | 58                         | 22822              | 6.51            | 15                           | 3                                        | 6                              | 3                                          | 6                                     | 0.36                           | 0.72               |
| SGO1_HUMAN         | Calsin-binding mitochondrial carrier protein SGMO-1                                                | 57                         | 53320              | 6               | 5                            | 2                                        | 5                              | 2                                          | 5                                     | 0.21                           | 0.17               |
| DOTN_HUMAN         | Dynactin subunit 4                                                                                 | 57                         | 52304              | 7.7             | 1                            | 1                                        | 1                              | 1                                          | 1                                     | 0.06                           | 0.08               |
| VMP1_HUMAN         | Vacuole membrane protein 1                                                                         | 57                         | 46208              | 6.47            | 2                            | 2                                        | 1                              | 1                                          | 1                                     | 0.07                           | 0.09               |
| AP1G1_HUMAN        | AP-1 complex subunit gamma-1                                                                       | 57                         | 97253              | 6.36            | 8                            | 3                                        | 7                              | 3                                          | 7                                     | 0.17                           | 0.15               |
| NPC1_HUMAN         | Niemann-Pick C1 protein                                                                            | 57                         | 142074             | 5.17            | 5                            | 1                                        | 3                              | 1                                          | 3                                     | 0.05                           | 0.03               |
| TMSB2_HUMAN        | Transmembrane 8 superfamily member 2                                                               | 57                         | 75725              | 7.23            | 5                            | 2                                        | 3                              | 1                                          | 3                                     | 0.08                           | 0.06               |
| FKBP7_HUMAN        | Peptidyl-prolyl isomerase FKBP7                                                                    | 57                         | 28959              | 6.05            | 4                            | 3                                        | 4                              | 3                                          | 4                                     | 0.22                           | 0.31               |
| VASP_HUMAN         | Vasodilator-stimulated phosphoprotein                                                              | 56                         | 38805              | 9.05            | 13                           | 3                                        | 8                              | 3                                          | 8                                     | 0.24                           | 0.37               |
| APBF_HUMAN         | Apoptosis-inducing factor 1, mitochondrial                                                         | 56                         | 68559              | 9.04            | 3                            | 1                                        | 3                              | 1                                          | 3                                     | 0.09                           | 0.06               |
| COX1_HUMAN         | Cytochrome c oxidase subunit 1                                                                     | 56                         | 57003              | 6.19            | 3                            | 3                                        | 2                              | 2                                          | 2                                     | 0.06                           | 0.16               |
| HGG2_HUMAN         | HGG1 domain family member 2A, mitochondrial                                                        | 56                         | 11521              | 10.21           | 3                            | 3                                        | 1                              | 1                                          | 1                                     | 0.2                            | 0.42               |
| NOL2_HUMAN         | Nucleosent                                                                                         | 56                         | 45302              | 4.89            | 1                            | 1                                        | 1                              | 1                                          | 1                                     | 0.06                           | 0.09               |
| GSDE1_HUMAN        | Odd shock domain-containing protein E1                                                             | 56                         | 88829              | 9.88            | 5                            | 2                                        | 4                              | 2                                          | 4                                     | 0.08                           | 0.1                |
| DORL2_HUMAN        | Dorf-2                                                                                             | 56                         | 27549              | 6.73            | 2                            | 2                                        | 1                              | 1                                          | 1                                     | 0.13                           | 0.18               |
| COMD1_HUMAN        | COMMD domain-containing protein 2                                                                  | 56                         | 27231              | 6.24            | 7                            | 2                                        | 3                              | 1                                          | 3                                     | 0.31                           | 0.44               |
| EPCE2_HUMAN        | Endoplasmic reticulum-Daql intermediate compartment protein 3                                      | 56                         | 43194              | 5.68            | 4                            | 2                                        | 2                              | 1                                          | 2                                     | 0.09                           | 0.1                |
| QCRF_HUMAN         | Cytochrome bmc1 complex subunit 6, mitochondrial                                                   | 56                         | 10722              | 4.29            | 2                            | 1                                        | 1                              | 1                                          | 1                                     | 0.2                            | 0.46               |
| MCFD2_HUMAN        | Multiple coagulation factor deficiency protein 2                                                   | 55                         | 16380              | 4.21            | 1                            | 1                                        | 1                              | 1                                          | 1                                     | 0.16                           | 0.28               |
| RPL5_HUMAN         | Rpl11 family-interacting protein 5                                                                 | 55                         | 70372              | 9.28            | 4                            | 3                                        | 3                              | 2                                          | 3                                     | 0.1                            | 0.13               |
| NDC5_HUMAN         | Nucleolin-5                                                                                        | 55                         | 50164              | 5.03            | 7                            | 2                                        | 4                              | 1                                          | 4                                     | 0.16                           | 0.09               |
| PLD3_HUMAN         | Phospholipase D3                                                                                   | 55                         | 54871              | 6.02            | 5                            | 1                                        | 4                              | 1                                          | 4                                     | 0.21                           | 0.05               |
| TENM4_HUMAN        | Tenascin-4                                                                                         | 55                         | 32092              | 6.7             | 5                            | 2                                        | 4                              | 1                                          | 4                                     | 0.13                           | 0.17               |
| CYBB2_HUMAN        | Cytochrome b5 type B                                                                               | 54                         | 16322              | 4.88            | 2                            | 1                                        | 2                              | 1                                          | 2                                     | 0.29                           | 0.29               |
| NPC2_HUMAN         | Ecdysial secretory protein E1                                                                      | 54                         | 16559              | 7.26            | 6                            | 3                                        | 2                              | 2                                          | 2                                     | 0.28                           | 0.64               |
| TRB2_HUMAN         | Nucleosent TRB                                                                                     | 54                         | 287131             | 4.97            | 14                           | 2                                        | 13                             | 2                                          | 13                                    | 0.03                           | 0.1                |
| AFGA_HUMAN         | Angiogenesis                                                                                       | 54                         | 53554              | 5.85            | 1                            | 1                                        | 1                              | 1                                          | 1                                     | 0.03                           | 0.08               |
| RAT1_HUMAN         | RasGAP1                                                                                            | 54                         | 109973             | 5.67            | 8                            | 1                                        | 5                              | 1                                          | 5                                     | 0.08                           | 0.04               |
| XPO1_HUMAN         | Exportin-1                                                                                         | 54                         | 123828             | 5.81            | 7                            | 1                                        | 5                              | 1                                          | 5                                     | 0.06                           | 0.03               |
| OSGEP_HUMAN        | Proteinase RNA N6-adenosine threosylcarbamoyltransferase                                           | 54                         | 36403              | 5.94            | 1                            | 1                                        | 1                              | 1                                          | 1                                     | 0.08                           | 0.12               |
| MCO4_HUMAN         | Lactadherin                                                                                        | 54                         | 33005              | 6.47            | 11                           | 3                                        | 9                              | 3                                          | 9                                     | 0.41                           | 0.34               |
| AT131_HUMAN        | Manganese-transporting ATPase 13A1                                                                 | 54                         | 133870             | 8.46            | 12                           | 1                                        | 6                              | 1                                          | 6                                     | 0.07                           | 0.03               |
| NDC2_HUMAN         | Nuclear magnetron protein nuc2                                                                     | 54                         | 32219              | 5.27            | 4                            | 2                                        | 4                              | 2                                          | 4                                     | 0.15                           | 0.21               |
| TRXN1_HUMAN        | Aldehyde dehydrogenase 1                                                                           | 54                         | 61803              | 6.15            | 8                            | 2                                        | 6                              | 2                                          | 6                                     | 0.18                           | 0.14               |
| PRAF1_HUMAN        | PRAF1 family protein 3                                                                             | 54                         | 21600              | 9.77            | 2                            | 1                                        | 2                              | 1                                          | 2                                     | 0.14                           | 0.21               |
| TRF12_HUMAN        | Multifunctional nucleoside diphosphate subunit TRM12-like protein                                  | 54                         | 41980              | 5.71            | 3                            | 1                                        | 3                              | 1                                          | 3                                     | 0.21                           | 0.33               |
| SMTC_HUMAN         | Cytosolic perox 5-methyltransferase                                                                | 53                         | 64429              | 5.75            | 6                            | 4                                        | 5                              | 4                                          | 5                                     | 0.19                           | 0.29               |
| NALB_HUMAN         | NADH-thiamine oxidoreductase chain 4                                                               | 53                         | 51547              | 5.4             | 2                            | 1                                        | 2                              | 1                                          | 2                                     | 0.09                           | 0.08               |
| ABPL_HUMAN         | Actin-related protein 2/3 complex subunit 5-like protein                                           | 53                         | 18931              | 6.16            | 2                            | 2                                        | 2                              | 2                                          | 2                                     | 0.22                           | 0.42               |
| TTL12_HUMAN        | Tubulin-tyrosine ligase-like protein 12                                                            | 53                         | 74356              | 5.23            | 4                            | 3                                        | 4                              | 3                                          | 4                                     | 0.15                           | 0.18               |
| ISOC2_HUMAN        | Isocitronate dehydratase domain-containing protein 2                                               | 53                         | 22223              | 7.87            | 6                            | 2                                        | 5                              | 2                                          | 5                                     | 0.46                           | 0.45               |
| PPPS_HUMAN         | Farnesyl pyrophosphate synthase                                                                    | 53                         | 48245              | 5.83            | 5                            | 3                                        | 3                              | 2                                          | 3                                     | 0.17                           | 0.19               |
| MCI1_HUMAN         | MDC5 complex subunit MCI3                                                                          | 53                         | 13079              | 9.44            | 4                            | 2                                        | 2                              | 2                                          | 2                                     | 0.44                           | 0.66               |
| SFO1_HUMAN         | Sodium factor 1                                                                                    | 53                         | 65286              | 9.07            | 6                            | 1                                        | 4                              | 1                                          | 4                                     | 0.05                           | 0.01               |
| SAP2_HUMAN         | Gardoside GMP activator                                                                            | 52                         | 20829              | 5.17            | 3                            | 2                                        | 2                              | 2                                          | 2                                     | 0.18                           | 0.48               |
| USP9_HUMAN         | Proteinase ubiquitin carboxyl-terminal hydrolase FAX-X                                             | 52                         | 226094             | 5.52            | 15                           | 3                                        | 14                             | 3                                          | 14                                    | 0.12                           | 0.04               |
| PSB3_HUMAN         | Core-binding factor subunit beta                                                                   | 52                         | 27455              | 5.23            | 3                            | 1                                        | 3                              | 1                                          | 3                                     | 0.41                           | 0.21               |
| CUL5_HUMAN         | Cul-5                                                                                              | 52                         | 90887              | 8.08            | 8                            | 1                                        | 8                              | 1                                          | 8                                     | 0.17                           | 0.05               |
| PLN2_HUMAN         | Perlecan-2                                                                                         | 52                         | 40045              | 6.34            | 7                            | 2                                        | 6                              | 2                                          | 6                                     | 0.26                           | 0.19               |
| DPP3_HUMAN         | Dipeptidyl peptidase 3                                                                             | 52                         | 82538              | 5.02            | 9                            | 2                                        | 8                              | 2                                          | 8                                     | 0.23                           | 0.11               |
| MVD_HUMAN          | Dihydrodipicolinate decarboxylase                                                                  | 52                         | 43377              | 6.78            | 4                            | 3                                        | 4                              | 3                                          | 4                                     | 0.26                           | 0.33               |
| QNB1_HUMAN         | Oligonucleotide, mitochondrial                                                                     | 52                         | 28816              | 6.41            | 6                            | 3                                        | 6                              | 3                                          | 6                                     | 0.46                           | 0.59               |
| MLEC_HUMAN         | Malecin                                                                                            | 51                         | 32214              | 5.27            | 2                            | 1                                        | 1                              | 1                                          | 1                                     | 0.08                           | 0.14               |
| TOP4_HUMAN         | Activated RNA polymerase II transcriptional coactivator p15                                        | 51                         | 14386              | 9.6             | 5                            | 3                                        | 3                              | 2                                          | 3                                     | 0.24                           | 0.26               |
| STOAC_HUMAN        | Protein S100-A13                                                                                   | 51                         | 11464              | 5.91            | 10                           | 3                                        | 5                              | 1                                          | 5                                     | 0.39                           | 0.43               |
| UBR5_HUMAN         | Ubiquitin-associated and E3S domain-containing protein B                                           | 51                         | 72849              | 6.48            | 2                            | 2                                        | 1                              | 1                                          | 1                                     | 0.03                           | 0.06               |
| TBC1_HUMAN         | Serine/threonine-protein kinase TBC1                                                               | 51                         | 63589              | 6.32            | 5                            | 1                                        | 4                              | 1                                          | 4                                     | 0.06                           | 0.05               |
| RRI1_HUMAN         | Ribonucleoside-diphosphate reductase large subunit                                                 | 51                         | 90013              | 6.76            | 5                            | 1                                        | 5                              | 1                                          | 5                                     | 0.15                           | 0.05               |
| DHE2_HUMAN         | Quinone dehydrogenase 1, mitochondrial                                                             | 50                         | 61359              | 7.69            | 8                            | 2                                        | 6                              | 2                                          | 6                                     | 0.21                           | 0.15               |
| STXB3_HUMAN        | Syntaxin-6-like protein 3                                                                          | 50                         | 67721              | 7.88            | 4                            | 2                                        | 3                              | 1                                          | 3                                     | 0.09                           | 0.06               |
| TMSB2_HUMAN        | Transmembrane 8 superfamily member 3                                                               | 50                         | 67843              | 6.83            | 2                            | 1                                        | 2                              | 1                                          | 2                                     | 0.08                           | 0.06               |
| PTSG2_HUMAN        | Prostaglandin G/H synthase                                                                         | 50                         | 7091               | 9.56            | 2                            | 2                                        | 1                              | 1                                          | 1                                     | 0.16                           | 0.27               |
| DOK4_HUMAN         | Doxylkinase kinase alpha                                                                           | 49                         | 83577              | 6.28            | 5                            | 2                                        | 4                              | 1                                          | 4                                     | 0.09                           | 0.05               |
| CSB2_HUMAN         | COP1 signalosome complex subunit 3                                                                 | 49                         | 47842              | 6.19            | 6                            | 2                                        | 6                              | 2                                          | 6                                     | 0.27                           | 0.19               |
| FKBP4_HUMAN        | Peptidyl-prolyl isomerase FKBP4                                                                    | 49                         | 17772              | 5.35            | 8                            | 2                                        | 4                              | 2                                          | 4                                     | 0.17                           | 0.24               |
| ODD2_HUMAN         | Dihydrodipicolinate decarboxylase component of 2-oxoglutarate dehydrogenase complex, mitochondrial | 49                         | 48724              | 9.11            | 3                            | 1                                        | 3                              | 1                                          | 3                                     | 0.11                           | 0.09               |
| POXA3_HUMAN        | Protein disulfine-isomerase A3                                                                     | 49                         | 95550              | 6.06            | 2                            | 1                                        | 2                              | 1                                          | 2                                     | 0.11                           | 0.07               |
| ADPQK_HUMAN        | ADP-dependent glucokinase                                                                          | 49                         | 54055              | 5.77            | 3                            | 3                                        | 2                              | 2                                          | 2                                     | 0.08                           | 0.17               |
| SAT2_HUMAN         | Neutral amino acid transporter A                                                                   | 49                         | 55888              | 5.88            | 4                            | 3                                        | 2                              | 2                                          | 2                                     | 0.1                            | 0.18               |
| COX2_HUMAN         | Cytochrome c oxidase subunit 2                                                                     | 49                         | 25456              | 4.67            | 5                            | 3                                        | 2                              | 1                                          | 2                                     | 0.13                           | 0.38               |
| NU155_HUMAN        | Nuclear pore complex protein Nup155                                                                | 49                         | 155100             | 5.78            | 6                            | 2                                        | 5                              | 1                                          | 5                                     | 0.1                            | 0.03               |
| PAUK_HUMAN         | Paikin                                                                                             | 49                         | 44464              | 5.8             | 8                            | 2                                        | 6                              | 2                                          | 6                                     | 0.24                           | 0.14               |
| SPN51_HUMAN        | Protein spinter homolog 1                                                                          | 49                         | 56594              | 6.19            | 3                            | 2                                        | 3                              | 2                                          | 3                                     | 0.13                           | 0.16               |
| RRI2_HUMAN         | Ribonucleoside-diphosphate reductase subunit MD B                                                  | 48                         | 40710              | 4.89            | 1                            | 1                                        | 1                              | 1                                          | 1                                     | 0.07                           | 0.11               |
| TMSB2_HUMAN        | Transmembrane 8 superfamily member 3                                                               | 48                         | 25885              | 4.71            | 1                            | 1                                        | 1                              | 1                                          | 1                                     | 0.12                           | 0.17               |
| ARPP1_HUMAN        | Arp1                                                                                               | 48                         | 24927              | 5.57            | 2                            | 2                                        | 1                              | 1                                          | 1                                     | 0.12                           | 0.18               |
| LYPA_HUMAN         | Acyl-coenzyme A thioesterase 1                                                                     | 48                         | 24653              | 6.29            | 2                            | 1                                        | 2                              | 1                                          | 2                                     | 0.18                           | 0.18               |
| HEBO_HUMAN         | 3-hydroxybutyryl-CoA hydrolase, mitochondrial                                                      | 48                         | 43454              | 6.38            | 4                            | 2                                        | 3                              | 1                                          | 3                                     | 0.16                           | 0.1                |
| DHX15_HUMAN        | Pra-mRNA-binding factor ATP-dependent RNA helicase DHX15                                           | 48                         | 96875              | 7.12            | 5                            | 3                                        | 4                              | 2                                          | 4                                     | 0.09                           | 0.1                |
| MCRAL_HUMAN        | Matrix remodeling-associated protein B                                                             | 47                         | 49101              | 6.75            | 1                            | 1                                        | 1                              | 1                                          | 1                                     | 0.04                           | 0.05               |
| LSM2_HUMAN         | U6 snRNA-associated Sm-like protein LSM2                                                           | 47                         | 10828              | 6.04            | 2                            | 1                                        | 2                              | 1                                          | 2                                     | 0.41                           | 0.45               |
| QPE2_HUMAN         | UPF0550 protein QPE2                                                                               | 47                         | 108462             | 6.82            | 6                            | 2                                        | 6                              | 2                                          | 6                                     | 0.12                           | 0.08               |
| SYT2_HUMAN         | Phospholipase-C/RNA lipase beta subunit                                                            | 39                         | 46074              | 5.64            | 8                            | 3                                        | 4                              | 3                                          | 4                                     | 0.15                           | 0.21               |
| QOZ_HUMAN          | Quinone oxidoreductase                                                                             | 47                         | 35185              | 8.66            | 2                            | 1                                        | 2                              | 1                                          | 2                                     | 0.12                           | 0.13               |
| MICAL1_HUMAN       | [E=60]-monooxygenase MICAL1                                                                        | 47                         | 117801             | 6               | 6                            | 1                                        | 5                              | 1                                          | 5                                     | 0.12                           | 0.04               |
| QPE2_HUMAN         | QDH (GDP, endoplasmic reticulum protein                                                            | 47                         | 88836              | 6.84            | 6                            | 1                                        | 4                              | 1                                          | 4                                     | 0.08                           | 0.05               |
| DOX17_HUMAN        | Proteinase ATP-dependent RNA helicase DOX17                                                        | 47                         | 80222              | 5.53            | 5                            | 1                                        | 5                              | 1                                          | 4                                     | 0.11                           | 0.05               |
| QPE2_HUMAN         | E3 ubiquitin-protein ligase QPE2                                                                   | 47                         | 34824              | 5.61            | 3                            | 1                                        | 3                              | 1                                          | 3                                     | 0.17                           | 0.13               |
| IAD1_HUMAN         | HLA class I histocompatibility antigen, A-3 alpha chain                                            | 47                         | 40815              | 5.66            | 5                            | 2                                        | 5                              | 2                                          | 5                                     | 0.25                           | 0.23               |
| QPE2_HUMAN         | Cysteine-rich protein 2                                                                            | 47                         | 27479              | 5.01            | 1                            | 1                                        | 1                              | 1                                          | 1                                     | 0.06                           | 0.1                |
| TYPH_HUMAN         | Thymidine phosphorylase                                                                            | 46                         | 49924              | 5.36            | 6                            | 3                                        | 4                              | 2                                          | 4                                     | 0.18                           | 0.18               |

<sup>a</sup>Protein score is calculated from the score of the peptide attributed to the protein.

<sup>b</sup>pI is (Predicted) isoelectric point.

<sup>c</sup>Number of matches is spectrum number matched to protein<sup>1</sup>.

<sup>d</sup>Number of significant matches is spectrum number that matches protein and exceeds the identification criteria.

<sup>e</sup>Number of sequences is number of peptides matched to protein<sup>1</sup>.

<sup>f</sup>Number of significant sequences is number of peptides exceeding the identification criteria matched to proteins.

<sup>g</sup>Number of unique sequences is a unique<sup>6</sup> number of peptides matched to proteins.

<sup>h</sup>Sequence coverage is the ratio of the total number of matched peptide residues to the total length of the protein.

<sup>i</sup>Exponentially Modified Protein Abundance Index (http://www.matrixscience.com/help/quant\_empai\_help.html).

Table S2. Cont'd.

| UniProt/Swiss-Prot ID | Description                                                                   | Protein score <sup>a</sup> | Protein mass (kDa) | pI <sup>b</sup> | Num. of matches <sup>c</sup> | Num. of significant matches <sup>d</sup> | Num. of sequences <sup>e</sup> | Num. of significant sequences <sup>f</sup> | Num. of unique sequences <sup>g</sup> | Sequence coverage <sup>h</sup> | emPAI <sup>i</sup> |
|-----------------------|-------------------------------------------------------------------------------|----------------------------|--------------------|-----------------|------------------------------|------------------------------------------|--------------------------------|--------------------------------------------|---------------------------------------|--------------------------------|--------------------|
| ARHGAP2_HUMAN         | Rho guanine nucleotide exchange factor 2                                      | 46                         | 41476              | 6.8             | 1                            | 1                                        | 1                              | 1                                          | 1                                     | 0.04                           | 0.04               |
| VPS4A_HUMAN           | Vacuolar protein sorting-associated protein 4A                                | 46                         | 40867              | 7.84            | 5                            | 3                                        | 2                              | 3                                          | 2                                     | 0.15                           | 0.19               |
| RS27L2_HUMAN          | 45S ribosomal protein S27-like                                                | 46                         | 9471               | 9.57            | 2                            | 1                                        | 2                              | 1                                          | 2                                     | 0.3                            | 0.53               |
| EXOC5_HUMAN           | Exosome complex component RRP46                                               | 46                         | 29232              | 7.53            | 1                            | 1                                        | 1                              | 1                                          | 1                                     | 0.1                            | 0.1                |
| RBK1_HUMAN            | Receptor-interacting serine/threonine-protein kinase 1                        | 46                         | 78883              | 5.92            | 4                            | 1                                        | 3                              | 1                                          | 3                                     | 0.08                           | 0.06               |
| SHV2L_HUMAN           | Helicase SHV2                                                                 | 46                         | 137688             | 5.72            | 4                            | 1                                        | 3                              | 1                                          | 3                                     | 0.35                           | 0.93               |
| IMM4L2_HUMAN          | Immunin subunit alpha-5                                                       | 46                         | 60184              | 4.54            | 3                            | 2                                        | 0.5                            | 2                                          | 2                                     | 0.14                           | 0.15               |
| NRK2_HUMAN            | Serine/threonine-protein kinase Nrsk2                                         | 46                         | 34528              | 8.49            | 7                            | 3                                        | 6                              | 3                                          | 6                                     | 0.36                           | 0.43               |
| RPS7A_HUMAN           | Ribosome-binding factor 2, mitochondrial                                      | 46                         | 95545              | 6.08            | 2                            | 1                                        | 2                              | 1                                          | 2                                     | 0.06                           | 0.05               |
| AMRP_HUMAN            | Alpha-2-macroglobulin receptor-associated protein                             | 46                         | 41441              | 8.73            | 5                            | 3                                        | 3                              | 2                                          | 3                                     | 0.12                           | 0.22               |
| MCL1_HUMAN            | MCCO5 complex subunit MCL1                                                    | 46                         | 26139              | 8.48            | 6                            | 1                                        | 2                              | 1                                          | 2                                     | 0.09                           | 0.17               |
| YAP1_HUMAN            | Transcriptional coactivator YAP1                                              | 45                         | 54427              | 5               | 4                            | 1                                        | 3                              | 1                                          | 3                                     | 0.15                           | 0.08               |
| FKBP5_HUMAN           | Peptidyl-prolyl cis-trans isomerase FKBP5                                     | 45                         | 44534              | 4.78            | 8                            | 3                                        | 4                              | 1                                          | 4                                     | 0.21                           | 0.1                |
| RAV1B_HUMAN           | Ram-specific GTPase-activating protein                                        | 45                         | 23266              | 5.19            | 5                            | 2                                        | 4                              | 1                                          | 4                                     | 0.26                           | 0.19               |
| NSF1_HUMAN            | NSF11 cofactor p47                                                            | 45                         | 40548              | 4.99            | 5                            | 2                                        | 4                              | 2                                          | 4                                     | 0.18                           | 0.23               |
| NUDC1_HUMAN           | NuS2 domain-containing protein 1                                              | 45                         | 66713              | 4.59            | 5                            | 1                                        | 5                              | 1                                          | 5                                     | 0.14                           | 0.26               |
| ACSD5_HUMAN           | Short branched-chain specific acyl-CoA dehydrogenase, mitochondrial           | 45                         | 47455              | 6.52            | 3                            | 1                                        | 2                              | 1                                          | 2                                     | 0.15                           | 0.09               |
| CI17_HUMAN            | Monofunctional C1-tetrahydrofolate synthase, mitochondrial                    | 45                         | 105724             | 8.32            | 3                            | 1                                        | 2                              | 1                                          | 2                                     | 0.04                           | 0.04               |
| OSPF_HUMAN            | OSPF glycoprotein                                                             | 45                         | 14168              | 6.02            | 6                            | 2                                        | 3                              | 2                                          | 3                                     | 0.49                           | 0.76               |
| WASCL_HUMAN           | WASH complex subunit 4                                                        | 45                         | 136316             | 7.1             | 6                            | 1                                        | 5                              | 1                                          | 5                                     | 0.08                           | 0.03               |
| UPRAR_HUMAN           | Urokinase plasminogen activator surface receptor                              | 45                         | 36993              | 6.2             | 5                            | 2                                        | 4                              | 1                                          | 4                                     | 0.3                            | 0.12               |
| RAB25_HUMAN           | RAB25 GTP exchange factor                                                     | 45                         | 79321              | 6.42            | 8                            | 2                                        | 6                              | 1                                          | 6                                     | 0.17                           | 0.05               |
| PULB2_HUMAN           | Putative phospholipase B-like 2                                               | 45                         | 65430              | 6.34            | 5                            | 2                                        | 3                              | 2                                          | 3                                     | 0.08                           | 0.14               |
| LYR2C_HUMAN           | Protein LYR2C                                                                 | 45                         | 63799              | 9.33            | 5                            | 3                                        | 3                              | 3                                          | 3                                     | 0.15                           | 0.22               |
| TPBXL_HUMAN           | Trophoblast glycoprotein                                                      | 45                         | 46003              | 6.35            | 3                            | 1                                        | 2                              | 1                                          | 2                                     | 0.06                           | 0.09               |
| PFMT1_HUMAN           | Protein phosphatase 1F                                                        | 44                         | 49000              | 4.99            | 3                            | 1                                        | 3                              | 1                                          | 3                                     | 0.1                            | 0.09               |
| PKP11_HUMAN           | Peptidyl-prolyl cis-trans isomerase FKBP11                                    | 44                         | 22166              | 9.44            | 2                            | 1                                        | 2                              | 1                                          | 2                                     | 0.14                           | 0.2                |
| NPPE2_HUMAN           | Nuclear pore glycoprotein p62                                                 | 44                         | 53222              | 5.21            | 2                            | 1                                        | 2                              | 1                                          | 2                                     | 0.08                           | 0.08               |
| CLP1L_HUMAN           | Clp1L and clp1L2 transmembrane protein 1-like protein                         | 44                         | 22189              | 8.71            | 3                            | 2                                        | 3                              | 2                                          | 3                                     | 0.07                           | 0.14               |
| LOC12_HUMAN           | Putative RRM-binding protein Loo-1-like 2                                     | 44                         | 46468              | 10.02           | 4                            | 1                                        | 4                              | 1                                          | 4                                     | 0.19                           | 0.09               |
| SPRE_HUMAN            | Sesquiterpene reductase                                                       | 44                         | 28031              | 8.24            | 1                            | 1                                        | 1                              | 1                                          | 1                                     | 0.08                           | 0.16               |
| CRP1L_HUMAN           | CRP1 regulatory subunit-associated protein 3                                  | 44                         | 96885              | 4.68            | 4                            | 2                                        | 2                              | 2                                          | 2                                     | 0.09                           | 0.06               |
| HM12L_HUMAN           | Minor histocompatibility antigen H13                                          | 44                         | 41462              | 6.01            | 3                            | 1                                        | 2                              | 1                                          | 2                                     | 0.13                           | 0.11               |
| DAD1_HUMAN            | Dab1-like-3-oligodendrocyte-specific protein glycosyltransferase subunit DAD1 | 44                         | 12489              | 6.52            | 2                            | 2                                        | 1                              | 1                                          | 1                                     | 0.11                           | 0.28               |
| RAB25L_HUMAN          | Ram-2-like protein RAB25L                                                     | 44                         | 24762              | 4.85            | 7                            | 1                                        | 6                              | 1                                          | 6                                     | 0.13                           | 0.16               |
| PTPA_HUMAN            | Serine/threonine-protein phosphatase 2A activator                             | 44                         | 40641              | 5.63            | 4                            | 2                                        | 3                              | 2                                          | 3                                     | 0.2                            | 0.23               |
| MAVS_HUMAN            | Mitochondrial antiviral-signaling protein                                     | 44                         | 22493              | 2.36            | 2                            | 1                                        | 2                              | 1                                          | 2                                     | 0.05                           | 0.02               |
| SOUB1_HUMAN           | Signal peptide, GUS and EGF-like domain-containing protein 3                  | 44                         | 109210             | 7.85            | 4                            | 2                                        | 3                              | 1                                          | 3                                     | 0.06                           | 0.04               |
| EPHD2_HUMAN           | EPH domain-containing protein D2                                              | 44                         | 26880              | 5.15            | 2                            | 1                                        | 2                              | 1                                          | 2                                     | 0.12                           | 0.17               |
| SCDOL_HUMAN           | Saccharosyl dehydrogenase-like oxidoreductase                                 | 44                         | 47121              | 9.24            | 4                            | 3                                        | 2                              | 2                                          | 2                                     | 0.13                           | 0.19               |
| TM6SF4_HUMAN          | Transmembrane 6 superfamily member 4                                          | 44                         | 74470              | 6.1             | 7                            | 1                                        | 5                              | 1                                          | 5                                     | 0.16                           | 0.06               |
| NCHO_HUMAN            | Non-TOU domain-containing octanone-binding protein                            | 44                         | 54197              | 6.01            | 5                            | 1                                        | 4                              | 1                                          | 4                                     | 0.21                           | 0.05               |
| ARK2_HUMAN            | Alk100B B1 dehydro reductase member 2                                         | 43                         | 39564              | 6.7             | 4                            | 1                                        | 3                              | 1                                          | 3                                     | 0.18                           | 0.11               |
| NLU2L_HUMAN           | NADH-dependent oxidoreductase chain 5                                         | 43                         | 66862              | 9.14            | 2                            | 1                                        | 2                              | 1                                          | 2                                     | 0.09                           | 0.26               |
| AMPD3_HUMAN           | AMP deaminase 2                                                               | 43                         | 100264             | 6.46            | 3                            | 1                                        | 2                              | 1                                          | 2                                     | 0.04                           | 0.04               |
| IPYR2_HUMAN           | Inorganic pyrophosphatase 2, mitochondrial                                    | 43                         | 37896              | 7.07            | 2                            | 1                                        | 2                              | 1                                          | 2                                     | 0.14                           | 0.12               |
| TPP3L_HUMAN           | Tumor necrosis factor alpha-induced protein 8                                 | 43                         | 23969              | 7.74            | 4                            | 1                                        | 3                              | 1                                          | 3                                     | 0.2                            | 0.2                |
| MTX2_HUMAN            | Metastin-2                                                                    | 43                         | 29744              | 5.9             | 4                            | 2                                        | 2                              | 1                                          | 2                                     | 0.19                           | 0.15               |
| TMED2_HUMAN           | Transmembrane emp24 domain-containing protein 3                               | 43                         | 24761              | 5.4             | 7                            | 1                                        | 3                              | 1                                          | 3                                     | 0.3                            | 0.18               |
| PTN2L_HUMAN           | Tyrosine-protein phosphatase non-receptor type 23                             | 43                         | 176891             | 6.45            | 1                            | 1                                        | 1                              | 1                                          | 1                                     | 0.01                           | 0.01               |
| RAB35_HUMAN           | Ram-3-like protein RAB35                                                      | 43                         | 23011              | 8.52            | 10                           | 1                                        | 3                              | 1                                          | 2                                     | 0.2                            | 0.2                |
| STFA2_HUMAN           | Phenylalanine-tRNA ligase alpha subunit                                       | 43                         | 57526              | 7.31            | 3                            | 1                                        | 3                              | 1                                          | 3                                     | 0.13                           | 0.08               |
| FAM101_HUMAN          | Acyltransferase FAM101, mitochondrial                                         | 43                         | 24827              | 6.96            | 3                            | 3                                        | 2                              | 2                                          | 2                                     | 0.25                           | 0.39               |
| RBP2L_HUMAN           | E3 SUMO-protein ligase RBP2                                                   | 43                         | 35794              | 5.85            | 17                           | 1                                        | 15                             | 1                                          | 15                                    | 0.09                           | 0.01               |
| MEGAL_HUMAN           | Lysosomal integral membrane protein 2                                         | 43                         | 52750              | 9.17            | 4                            | 1                                        | 3                              | 1                                          | 3                                     | 0.09                           | 0.08               |
| RHO1_HUMAN            | Rho GTPase-activating protein 17                                              | 43                         | 95377              | 7.23            | 3                            | 1                                        | 3                              | 1                                          | 3                                     | 0.07                           | 0.04               |
| ASMTL_HUMAN           | Proteinase-kinase O-methyltransferase                                         | 42                         | 51140              | 5.48            | 3                            | 1                                        | 3                              | 1                                          | 3                                     | 0.13                           | 0.08               |
| CATL2_HUMAN           | Cathepsin                                                                     | 42                         | 95719              | 6.9             | 5                            | 1                                        | 4                              | 1                                          | 4                                     | 0.13                           | 0.07               |
| TB12L_HUMAN           | 182 kDa tubulin-sea-1-binding protein                                         | 42                         | 181685             | 4.77            | 6                            | 1                                        | 3                              | 1                                          | 3                                     | 0.02                           | 0.02               |
| DCUP_HUMAN            | Unconjugated deubiquitinase                                                   | 42                         | 40761              | 5.77            | 3                            | 2                                        | 2                              | 2                                          | 2                                     | 0.15                           | 0.23               |
| BDH2_HUMAN            | 3-hydroxybutyrate dehydrogenase type 2                                        | 42                         | 26707              | 7.96            | 3                            | 1                                        | 3                              | 1                                          | 3                                     | 0.21                           | 0.17               |
| PLD1_HUMAN            | Phospholipase C1                                                              | 42                         | 211371             | 6.8             | 5                            | 1                                        | 4                              | 1                                          | 4                                     | 0.04                           | 0.02               |
| HERL1_HUMAN           | Heterogeneous nuclear ribonucleoprotein L-like                                | 42                         | 60045              | 7.83            | 2                            | 2                                        | 2                              | 2                                          | 2                                     | 0.08                           | 0.15               |
| HERC4_HUMAN           | Probable E3 ubiquitin-protein ligase HERC4                                    | 41                         | 118487             | 5.8             | 9                            | 3                                        | 6                              | 2                                          | 6                                     | 0.14                           | 0.07               |
| VPS2L_HUMAN           | Vacuolar protein sorting-associated protein 51 homolog                        | 41                         | 95868              | 6.06            | 2                            | 1                                        | 2                              | 1                                          | 2                                     | 0.06                           | 0.09               |
| PHG1_HUMAN            | Protein-4-oxalophorbonylamine dehydratase                                     | 41                         | 11892              | 6.28            | 3                            | 1                                        | 3                              | 1                                          | 3                                     | 0.41                           | 0.4                |
| RECK_HUMAN            | Reversion-inducing cysteine-rich protein with Kazal motifs                    | 41                         | 106388             | 6.35            | 9                            | 1                                        | 7                              | 1                                          | 7                                     | 0.17                           | 0.04               |
| CATL1_HUMAN           | UPP087 protein C1orf123                                                       | 41                         | 18037              | 4.93            | 2                            | 1                                        | 2                              | 1                                          | 2                                     | 0.17                           | 0.26               |
| IMPA1_HUMAN           | Invariant monophosphatase 1                                                   | 41                         | 30169              | 5.16            | 3                            | 1                                        | 3                              | 1                                          | 3                                     | 0.27                           | 0.15               |
| SH2C_HUMAN            | Sorting nexin-2                                                               | 41                         | 98435              | 5.04            | 8                            | 2                                        | 5                              | 2                                          | 5                                     | 0.17                           | 0.19               |
| TF1_HUMAN             | Tissue factor                                                                 | 41                         | 33047              | 6.84            | 4                            | 1                                        | 3                              | 1                                          | 3                                     | 0.18                           | 0.13               |
| HP1_HUMAN             | Hypoxanthine kinase factor 1-like inhibitor                                   | 41                         | 40280              | 5.39            | 1                            | 1                                        | 1                              | 1                                          | 1                                     | 0.07                           | 0.11               |
| MTX2L_HUMAN           | Sedolisin-dependent kinase sulfate isomerase type-2                           | 41                         | 49323              | 6.02            | 7                            | 1                                        | 6                              | 1                                          | 6                                     | 0.21                           | 0.1                |
| BAG3_HUMAN            | BAG family molecular chaperone regulator 3                                    | 40                         | 61557              | 6.46            | 3                            | 2                                        | 3                              | 2                                          | 3                                     | 0.13                           | 0.15               |
| UBE2Z_HUMAN           | Ubiquitin-conjugating enzyme E2 Z                                             | 40                         | 38186              | 5.37            | 2                            | 1                                        | 2                              | 1                                          | 2                                     | 0.11                           | 0.11               |
| ABHD14_HUMAN          | Protein ABHD14B                                                               | 40                         | 22332              | 5.94            | 3                            | 2                                        | 2                              | 2                                          | 2                                     | 0.15                           | 0.45               |
| KAP2_HUMAN            | cAMP-dependent protein kinase type II-Alpha regulatory subunit                | 40                         | 45490              | 4.96            | 2                            | 1                                        | 2                              | 1                                          | 2                                     | 0.07                           | 0.1                |
| UBFD1_HUMAN           | Ubiquitin domain-containing protein UBFD1                                     | 40                         | 33551              | 5.55            | 4                            | 2                                        | 3                              | 1                                          | 3                                     | 0.17                           | 0.13               |
| OSBL2_HUMAN           | Oxytocin-binding protein-related protein 8                                    | 40                         | 101132             | 6.52            | 10                           | 1                                        | 8                              | 1                                          | 8                                     | 0.14                           | 0.04               |
| PAPPT1_HUMAN          | TGDD-motif-like poly (ADP-ribose) polymerase                                  | 40                         | 76178              | 6.19            | 69                           | 1                                        | 3                              | 1                                          | 3                                     | 0.28                           | 0.26               |
| ARMK2_HUMAN           | Armadillo repeat-containing 2-related protein 2                               | 40                         | 65643              | 8.68            | 2                            | 1                                        | 2                              | 1                                          | 2                                     | 0.06                           | 0.07               |
| GLRX2_HUMAN           | Glu-taraldehyde-3                                                             | 40                         | 37408              | 5.21            | 7                            | 2                                        | 5                              | 1                                          | 5                                     | 0.26                           | 0.12               |
| CHRP1_HUMAN           | CR1 canonical receptor-interacting protein 1                                  | 40                         | 18637              | 7.72            | 4                            | 1                                        | 4                              | 1                                          | 4                                     | 0.53                           | 0.26               |
| BR1_HUMAN             | BFG-interacting domain death agonist                                          | 40                         | 21981              | 5.27            | 4                            | 3                                        | 2                              | 1                                          | 2                                     | 0.25                           | 0.21               |
| SRPL2_HUMAN           | Transcription-associated protein subunit delta                                | 40                         | 18897              | 5.76            | 4                            | 2                                        | 2                              | 2                                          | 2                                     | 0.18                           | 0.12               |
| CAT5_HUMAN            | Citronellal epoxide sensor for mTORC1 subunit 2                               | 40                         | 36034              | 5.02            | 1                            | 1                                        | 1                              | 1                                          | 1                                     | 0.11                           | 0.12               |
| HOUH1_HUMAN           | Pseudo-uridine-5'-phosphatase                                                 | 40                         | 25233              | 5.18            | 1                            | 1                                        | 1                              | 1                                          | 1                                     | 0.08                           | 0.18               |
| TOLIP_HUMAN           | TGF-interacting protein                                                       | 39                         | 30262              | 5.69            | 3                            | 1                                        | 3                              | 1                                          | 3                                     | 0.18                           | 0.15               |
| GET2L_HUMAN           | Glu-taraldehyde S-transferase Mu 2                                            | 39                         | 29728              | 6               | 6                            | 2                                        | 4                              | 1                                          | 4                                     | 0.28                           | 0.17               |
| FIS1_HUMAN            | Mitochondrial fusion 1 protein                                                | 39                         | 16927              | 8.84            | 2                            | 2                                        | 2                              | 1                                          | 2                                     | 0.18                           | 0.28               |
| QSOX1_HUMAN           | Olfactin subfamily A member 2                                                 | 39                         | 112017             | 5               | 7                            | 1                                        | 5                              | 1                                          | 5                                     | 0.09                           | 0.04               |
| LZIC_HUMAN            | Protein LZIC                                                                  | 39                         | 21481              | 4.88            | 3                            | 1                                        | 2                              | 1                                          | 2                                     | 0.26                           | 0.21               |
| AUP1_HUMAN            | Ancient ubiquitin-like protein 1                                              | 39                         | 32955              | 8.37            | 2                            | 1                                        | 2                              | 1                                          | 2                                     | 0.09                           | 0.08               |
| GPH1_HUMAN            | Glucosamine-6-phosphate isomerase 1                                           | 39                         | 32648              | 6.42            | 4                            | 2                                        | 3                              | 1                                          | 3                                     | 0.25                           | 0.14               |
| ANO12L_HUMAN          | Anoctamin-10                                                                  | 39                         | 76280              | 7.1             | 2                            | 1                                        | 2                              | 1                                          | 2                                     | 0.07                           | 0.06               |
| LAPTA_HUMAN           | Lamin-associated polypeptide 2, isoform alpha                                 | 39                         | 75446              | 7.56            | 3                            | 3                                        | 3                              | 3                                          | 3                                     | 0.17                           | 0.05               |
| MYLK_HUMAN            | Myosin light chain kinase, smooth muscle                                      | 39                         | 210583             | 5.85            | 10                           | 1                                        | 8                              | 1                                          | 8                                     | 0.09                           | 0.22               |
| CAT2_HUMAN            | Cathepsin 2                                                                   | 39                         | 33648              | 6.7             | 3                            | 1                                        | 2                              | 1                                          | 2                                     | 0.11                           | 0.13               |
| HDDC2_HUMAN           | HD domain-containing protein 2                                                | 39                         | 23376              | 5.33            | 3                            | 2                                        | 2                              | 2                                          | 2                                     | 0.21                           | 0.19               |
| HPH2L_HUMAN           | Hypoxanthine-guanine phosphoribosyltransferase                                | 39                         | 24564              | 6.21            | 4                            | 2                                        | 3                              | 1                                          | 3                                     | 0.25                           | 0.18               |

<sup>a</sup>Protein score is calculated from the score of the peptide attributed to the protein.

<sup>b</sup>pI is (Predicted) isoelectric point.

<sup>c</sup>Number of matches is spectrum number matched to protein<sup>d</sup>.

<sup>d</sup>Number of significant matches is spectrum number that matches protein and exceeds the identification criteria.

<sup>e</sup>Number of sequences is number of peptides matched to protein<sup>f</sup>.

<sup>f</sup>Number of significant sequences is number of peptides exceeding the identification criteria matched to proteins.

<sup>g</sup>Number of unique sequences is a unique<sup>g</sup> number of peptides matched to proteins.

<sup>h</sup>Sequence coverage is the ratio of the total number of matched peptide residues to the total length of the protein.

<sup>i</sup>Exponentially Modified Protein Abundance Index (http://www.matrixscience.com/help/quant\_empai\_help.html).

Table S2. Cont 10.

| UniProt/Swiss-Prot ID | Description                                                              | Protein score <sup>a</sup> | Protein mass (kDa) | pI <sup>b</sup> | Num. of matches <sup>c</sup> | Num. of significant matches <sup>d</sup> | Num. of sequences <sup>e</sup> | Num. of significant sequences <sup>f</sup> | Num. of unique sequences <sup>g</sup> | Sequence coverage <sup>h</sup> | emPAI |
|-----------------------|--------------------------------------------------------------------------|----------------------------|--------------------|-----------------|------------------------------|------------------------------------------|--------------------------------|--------------------------------------------|---------------------------------------|--------------------------------|-------|
| BMT1_HUMAN            | Myo-inositol-dependent interacting protein 1                             | 38                         | 9500               | 10.07           | 3                            | 1                                        | 2                              | 1                                          | 2                                     | 0.01                           | 0.01  |
| GORL2_HUMAN           | Cytoskeleton bcr1 complex subunit 8                                      | 38                         | 9900               | 10.07           | 3                            | 1                                        | 1                              | 1                                          | 1                                     | 0.26                           | 0.31  |
| HEML2_HUMAN           | Prothymosin domain                                                       | 38                         | 39306              | 6.68            | 4                            | 1                                        | 3                              | 1                                          | 3                                     | 0.15                           | 0.11  |
| NTSD1_HUMAN           | S-trimethylcysteine domain-containing protein 1                          | 38                         | 51812              | 5.84            | 1                            | 1                                        | 1                              | 1                                          | 1                                     | 0.04                           | 0.04  |
| ATP1F_HUMAN           | ATP synthase F0 subunit B1, mitochondrial                                | 38                         | 28890              | 9.37            | 3                            | 1                                        | 3                              | 1                                          | 3                                     | 0.14                           | 0.15  |
| CPPEF1_HUMAN          | Serine/threonine-protein phosphatase CPPEF1                              | 38                         | 28528              | 5.16            | 2                            | 1                                        | 2                              | 1                                          | 2                                     | 0.12                           | 0.12  |
| RUVB1_HUMAN           | RuvB-like 1                                                              | 38                         | 50196              | 6.02            | 3                            | 2                                        | 3                              | 2                                          | 3                                     | 0.12                           | 0.18  |
| CHG65_HUMAN           | UPF0686 protein G1.1orf8                                                 | 38                         | 27338              | 5.28            | 4                            | 2                                        | 2                              | 1                                          | 2                                     | 0.16                           | 0.16  |
| SUMF5_HUMAN           | Sulfatase-modifying factor 2                                             | 38                         | 33822              | 7.28            | 1                            | 1                                        | 1                              | 1                                          | 1                                     | 0.03                           | 0.13  |
| PCYT2_HUMAN           | Ethanolamine-phosphate cytidylyltransferase                              | 38                         | 43808              | 6.44            | 4                            | 1                                        | 3                              | 1                                          | 3                                     | 0.13                           | 0.1   |
| PNK2L_HUMAN           | Phosphatidylethanol 3-kinase catalytic subunit 3                         | 37                         | 101405             | 6.37            | 4                            | 1                                        | 4                              | 1                                          | 4                                     | 0.06                           | 0.04  |
| CATL1_HUMAN           | Cathepsin L1                                                             | 38                         | 37540              | 5.21            | 2                            | 1                                        | 2                              | 1                                          | 2                                     | 0.11                           | 0.12  |
| GGX_HUMAN             | Glucagon debranching enzyme                                              | 38                         | 174522             | 6.31            | 4                            | 2                                        | 3                              | 2                                          | 3                                     | 0.04                           | 0.05  |
| OPT1A_HUMAN           | Geminin Chromatin/kinetochore 1, 1st isoform                             | 37                         | 88311              | 8.85            | 2                            | 1                                        | 2                              | 1                                          | 2                                     | 0.07                           | 0.05  |
| PAPS1_HUMAN           | Bifunctional 5'-phosphoribosyltransferase 5'-phosphoribosyltransferase 1 | 37                         | 70788              | 6.4             | 7                            | 1                                        | 6                              | 1                                          | 6                                     | 0.22                           | 0.06  |
| TRPG_HUMAN            | Trapping protein particle complex subunit 8                              | 37                         | 16599              | 6.41            | 6                            | 1                                        | 4                              | 1                                          | 4                                     | 0.05                           | 0.03  |
| PLAG_HUMAN            | Phospholipase A-2-converting protein                                     | 37                         | 87101              | 5.86            | 3                            | 1                                        | 3                              | 1                                          | 3                                     | 0.09                           | 0.05  |
| CLCA4_HUMAN           | Clathrin light chain A                                                   | 37                         | 27080              | 4.43            | 1                            | 1                                        | 1                              | 1                                          | 1                                     | 0.03                           | 0.17  |
| QBPR1_HUMAN           | Menkesin polyisoprenyl transferase alpha                                 | 37                         | 46262              | 6.13            | 2                            | 2                                        | 1                              | 1                                          | 1                                     | 0.04                           | 0.05  |
| CSPG1_HUMAN           | Chondroitin sulfate proteoglycan 4                                       | 37                         | 250382             | 5.27            | 4                            | 1                                        | 4                              | 1                                          | 4                                     | 0.04                           | 0.02  |
| SARH2_HUMAN           | S-adenosylhomocysteine hydrolase-like protein 1                          | 37                         | 58913              | 8.49            | 7                            | 3                                        | 6                              | 2                                          | 6                                     | 0.17                           | 0.15  |
| SRRL2_HUMAN           | Phosphoserine phosphatase                                                | 37                         | 24992              | 5.53            | 2                            | 1                                        | 2                              | 1                                          | 2                                     | 0.12                           | 0.18  |
| GPC1_HUMAN            | PDZ domain-containing protein GPC1                                       | 37                         | 36027              | 5.9             | 2                            | 1                                        | 2                              | 1                                          | 2                                     | 0.08                           | 0.12  |
| SUGA_HUMAN            | Succinate-CoA ligase (ADP/GDP-forming) subunit alpha, mitochondrial      | 36                         | 36227              | 9.91            | 3                            | 1                                        | 2                              | 1                                          | 2                                     | 0.12                           | 0.12  |
| GBF1_HUMAN            | Gdp-specific nucleotide A-arsenase guanine nucleotide exchange factor 1  | 36                         | 206315             | 5.48            | 12                           | 1                                        | 10                             | 1                                          | 9                                     | 0.1                            | 0.02  |
| MOXA1_HUMAN           | Maternal-zygotic-associated protein 7                                    | 36                         | 21432              | 4.24            | 1                            | 1                                        | 1                              | 1                                          | 1                                     | 0.14                           | 0.21  |
| SOTD1_HUMAN           | Sect1 family domain-containing protein 1                                 | 36                         | 72344              | 5.89            | 8                            | 5                                        | 6                              | 1                                          | 6                                     | 0.17                           | 0.33  |
| K1C12_HUMAN           | Keratin type I cytoskeletal 19                                           | 36                         | 44079              | 5.04            | 1                            | 1                                        | 1                              | 1                                          | 1                                     | 0.06                           | 0.1   |
| ALG3_HUMAN            | Galactose-4-epimerase                                                    | 36                         | 36322              | 9.34            | 1                            | 1                                        | 1                              | 1                                          | 1                                     | 0.05                           | 0.13  |
| OPA1_HUMAN            | Dynamin-like 120 kDa protein, mitochondrial                              | 36                         | 11561              | 7.88            | 3                            | 1                                        | 3                              | 1                                          | 3                                     | 0.07                           | 0.04  |
| CHZ2_HUMAN            | 2'-5'-pyridine nucleotide 3'-phosphatase                                 | 36                         | 47549              | 9.17            | 3                            | 2                                        | 2                              | 1                                          | 2                                     | 0.09                           | 0.08  |
| QLA4_HUMAN            | GMP synthase [L-lysine-cysteine-binding]                                 | 36                         | 74667              | 6.42            | 1                            | 2                                        | 2                              | 1                                          | 2                                     | 0.05                           | 0.17  |
| ANK13_HUMAN           | Ankrrin A13                                                              | 36                         | 35393              | 5.67            | 3                            | 1                                        | 2                              | 1                                          | 2                                     | 0.09                           | 0.12  |
| LCAP_HUMAN            | Leucyl-prolyl aminopeptidase                                             | 36                         | 117374             | 5.5             | 4                            | 1                                        | 3                              | 1                                          | 3                                     | 0.04                           | 0.04  |
| CUL2_HUMAN            | Cul-2                                                                    | 36                         | 66927              | 6.45            | 3                            | 1                                        | 3                              | 1                                          | 3                                     | 0.09                           | 0.05  |
| SCAM1_HUMAN           | Secretory carrier-associated membrane protein 1                          | 35                         | 37496              | 7.03            | 3                            | 2                                        | 1                              | 1                                          | 1                                     | 0.07                           | 0.12  |
| CDAL_HUMAN            | Endonuclease                                                             | 35                         | 88027              | 5.18            | 2                            | 2                                        | 2                              | 1                                          | 2                                     | 0.05                           | 0.11  |
| UBAL3_HUMAN           | NECD1-motif containing E1 catalytic subunit                              | 35                         | 51819              | 5.3             | 1                            | 1                                        | 1                              | 1                                          | 1                                     | 0.05                           | 0.08  |
| MOG1_HUMAN            | Eukaryotic translation elongation factor 1 epsilon-1                     | 35                         | 19198              | 8.54            | 2                            | 1                                        | 3                              | 1                                          | 3                                     | 0.14                           | 0.23  |
| PTER_HUMAN            | Phosphotransferase-related protein                                       | 35                         | 38993              | 6.07            | 1                            | 1                                        | 1                              | 1                                          | 1                                     | 0.06                           | 0.11  |
| CHCH2_HUMAN           | Cofactor coiled-coil coiled-coil helix domain-containing protein 2       | 35                         | 15503              | 8.43            | 1                            | 1                                        | 1                              | 1                                          | 1                                     | 0.19                           | 0.3   |
| CBR1_HUMAN            | CBR1 anion                                                               | 35                         | 18836              | 4.58            | 1                            | 1                                        | 1                              | 1                                          | 1                                     | 0.17                           | 0.24  |
| EPF3_HUMAN            | Eukaryotic translation initiation factor 3 subunit J                     | 35                         | 28045              | 4.72            | 3                            | 1                                        | 3                              | 1                                          | 3                                     | 0.21                           | 0.15  |
| WTF1_HUMAN            | Wntless                                                                  | 35                         | 100227             | 8.24            | 3                            | 1                                        | 3                              | 1                                          | 3                                     | 0.06                           | 0.04  |
| TXD12_HUMAN           | Threonine domain-containing protein 12                                   | 35                         | 19194              | 5.24            | 2                            | 1                                        | 2                              | 1                                          | 2                                     | 0.31                           | 0.24  |
| ITD3_HUMAN            | Inter-tubulin domain-containing protein 12                               | 35                         | 106397             | 6.14            | 9                            | 1                                        | 7                              | 1                                          | 7                                     | 0.14                           | 0.04  |
| ELARG_HUMAN           | Elargin-5                                                                | 34                         | 13125              | 6.13            | 2                            | 2                                        | 4                              | 2                                          | 4                                     | 0.37                           | 0.37  |
| CHB1_HUMAN            | Cytochrome b5 hemoproteinase homolog                                     | 34                         | 28030              | 6.71            | 6                            | 2                                        | 4                              | 2                                          | 4                                     | 0.33                           | 0.34  |
| SOPR_HUMAN            | Sulfate sulfonate oxidoreductase, mitochondrial                          | 34                         | 46929              | 9.18            | 4                            | 2                                        | 3                              | 2                                          | 3                                     | 0.11                           | 0.09  |
| E2B1_HUMAN            | Translation initiation factor eIF-2B subunit alpha                       | 34                         | 33691              | 6.9             | 4                            | 1                                        | 3                              | 1                                          | 3                                     | 0.22                           | 0.13  |
| SPR2A_HUMAN           | Signal peptide esterase-like 2A                                          | 34                         | 58104              | 8.65            | 1                            | 1                                        | 1                              | 1                                          | 1                                     | 0.02                           | 0.07  |
| SRX1L_HUMAN           | Serine racemase-1B                                                       | 34                         | 68551              | 5.44            | 2                            | 1                                        | 2                              | 1                                          | 2                                     | 0.07                           | 0.06  |
| REB2A_HUMAN           | Rac-related protein Rab-22A                                              | 34                         | 21841              | 8.32            | 2                            | 1                                        | 2                              | 1                                          | 2                                     | 0.15                           | 0.21  |
| UBP1L_HUMAN           | Ubiquitin-conjugating enzyme E2 R1                                       | 34                         | 26720              | 4.41            | 2                            | 1                                        | 1                              | 1                                          | 1                                     | 0.12                           | 0.17  |
| SOSTL1_HUMAN          | Sost-like domain-containing protein 1                                    | 34                         | 47557              | 5.1             | 6                            | 2                                        | 8                              | 2                                          | 8                                     | 0.38                           | 0.19  |
| ACBP_HUMAN            | Arg-Arg-Arg-binding protein                                              | 34                         | 10038              | 6.12            | 4                            | 2                                        | 3                              | 2                                          | 3                                     | 0.51                           | 1.25  |
| ERS1_HUMAN            | ERp57-binding protein ERp57                                              | 34                         | 68486              | 9.37            | 4                            | 1                                        | 4                              | 1                                          | 4                                     | 0.1                            | 0.06  |
| SARI1_HUMAN           | GTP-binding protein SARI1b                                               | 34                         | 22396              | 5.76            | 7                            | 2                                        | 6                              | 2                                          | 5                                     | 0.46                           | 0.45  |
| UBXK1_HUMAN           | UBX domain-containing protein 4                                          | 34                         | 96743              | 6.1             | 4                            | 3                                        | 3                              | 2                                          | 3                                     | 0.15                           | 0.16  |
| SPYK1_HUMAN           | Sideroflexin-2                                                           | 34                         | 35481              | 9.28            | 6                            | 1                                        | 4                              | 1                                          | 4                                     | 0.24                           | 0.12  |
| MOST2_HUMAN           | Microsomal diacylglycerol S-transferase 3                                | 34                         | 16906              | 9.46            | 6                            | 4                                        | 2                              | 2                                          | 2                                     | 0.32                           | 1.1   |
| TBR1L1_HUMAN          | Thyroid receptor-interacting protein 13                                  | 33                         | 22447              | 5.18            | 15                           | 13                                       | 13                             | 1                                          | 13                                    | 0.12                           | 0.02  |
| ATP1Q1_HUMAN          | ATP synthase subunit gamma, mitochondrial                                | 33                         | 32975              | 9.23            | 3                            | 1                                        | 3                              | 1                                          | 3                                     | 0.17                           | 0.13  |
| SGT1_HUMAN            | Protein SGT1 homolog                                                     | 33                         | 40998              | 5.07            | 3                            | 1                                        | 3                              | 1                                          | 3                                     | 0.15                           | 0.11  |
| BOLA2_HUMAN           | Bola-like protein 2                                                      | 33                         | 10110              | 6.07            | 4                            | 1                                        | 3                              | 1                                          | 3                                     | 0.31                           | 0.48  |
| ORX1_HUMAN            | Ox1-like protein                                                         | 33                         | 33756              | 6.26            | 3                            | 1                                        | 1                              | 1                                          | 1                                     | 0.06                           | 0.13  |
| STX17_HUMAN           | Syntaxin 17                                                              | 33                         | 33383              | 6.14            | 3                            | 1                                        | 2                              | 1                                          | 2                                     | 0.15                           | 0.13  |
| PDZL2_HUMAN           | PDZ and LIM domain protein 2                                             | 33                         | 37436              | 9               | 2                            | 2                                        | 1                              | 1                                          | 1                                     | 0.06                           | 0.12  |
| APBL_HUMAN            | Anchored protein B-100                                                   | 33                         | 515283             | 8.58            | 13                           | 2                                        | 11                             | 2                                          | 10                                    | 0.05                           | 0.02  |
| APOL2_HUMAN           | Apolipoprotein L2                                                        | 33                         | 37698              | 6.29            | 2                            | 1                                        | 2                              | 1                                          | 2                                     | 0.12                           | 0.12  |
| SYMC1_HUMAN           | Methionine-S-adenosyltransferase, cytosolic                              | 33                         | 101052             | 5.82            | 7                            | 1                                        | 1                              | 1                                          | 1                                     | 0.14                           | 0.04  |
| SRX1_HUMAN            | Serine racemase-1                                                        | 33                         | 52868              | 7.07            | 1                            | 1                                        | 1                              | 1                                          | 1                                     | 0.03                           | 0.08  |
| CDRL1_HUMAN           | Cerebellar degeneration-related protein 2-like                           | 33                         | 52978              | 5.7             | 2                            | 1                                        | 2                              | 1                                          | 2                                     | 0.08                           | 0.08  |
| HYEP_HUMAN            | Exonin hydroxylase 1                                                     | 33                         | 53915              | 8.77            | 7                            | 2                                        | 5                              | 2                                          | 5                                     | 0.24                           | 0.17  |
| ILF3_HUMAN            | Interleukin enhancer-binding factor 3                                    | 32                         | 95278              | 8.86            | 3                            | 2                                        | 3                              | 2                                          | 3                                     | 0.07                           | 0.04  |
| TBCE1_HUMAN           | Tubulin-specific chaperone cofactor E-like protein                       | 32                         | 48164              | 5.23            | 2                            | 1                                        | 1                              | 1                                          | 1                                     | 0.06                           | 0.09  |
| OCORL_HUMAN           | Cofactor-like domain-containing protein 6                                | 32                         | 53556              | 6.07            | 9                            | 2                                        | 4                              | 1                                          | 4                                     | 0.16                           | 0.08  |
| MOGL_HUMAN            | Mannosyl-glucosyltransferase                                             | 32                         | 91861              | 8.97            | 5                            | 2                                        | 5                              | 2                                          | 5                                     | 0.14                           | 0.1   |
| CORR1_HUMAN           | Coronin-1B                                                               | 32                         | 34200              | 5.81            | 6                            | 2                                        | 5                              | 2                                          | 5                                     | 0.26                           | 0.17  |
| WDR5L_HUMAN           | WD repeat-containing protein 26                                          | 32                         | 72078              | 5.74            | 2                            | 1                                        | 2                              | 1                                          | 2                                     | 0.06                           | 0.04  |
| TM165_HUMAN           | Transmembrane protein 165                                                | 32                         | 34683              | 6.54            | 1                            | 1                                        | 1                              | 1                                          | 1                                     | 0.06                           | 0.13  |
| DCT1_HUMAN            | DnaJ homolog subfamily C member 10                                       | 32                         | 91021              | 6.78            | 6                            | 1                                        | 6                              | 1                                          | 6                                     | 0.14                           | 0.05  |
| SRP98_HUMAN           | Signal recognition particle subunit SRP98                                | 32                         | 70686              | 8.75            | 7                            | 1                                        | 4                              | 1                                          | 4                                     | 0.1                            | 0.06  |
| ACAD12_HUMAN          | Acyl-CoA dehydrogenase family member 9, mitochondrial                    | 32                         | 68717              | 8.16            | 2                            | 1                                        | 2                              | 1                                          | 2                                     | 0.07                           | 0.06  |
| ACPL1_HUMAN           | Acyl-CoA oxidase-like oxidizing enzyme                                   | 32                         | 81173              | 5.29            | 5                            | 1                                        | 5                              | 1                                          | 5                                     | 0.17                           | 0.05  |
| GGK3L_HUMAN           | Glucagon synthase kinase-3 beta                                          | 31                         | 46715              | 8.88            | 3                            | 2                                        | 2                              | 1                                          | 2                                     | 0.13                           | 0.09  |
| APPL1_HUMAN           | Apoptosis inhibitor 5                                                    | 31                         | 58968              | 6.99            | 2                            | 1                                        | 2                              | 1                                          | 2                                     | 0.08                           | 0.07  |
| ACOX2_HUMAN           | Cytosolic acyl-CoA oxidase                                               | 31                         | 98337              | 6.23            | 6                            | 3                                        | 2                              | 2                                          | 2                                     | 0.06                           | 0.09  |
| BDNF_HUMAN            | Brain-derived neurotrophic factor                                        | 31                         | 49132              | 6.26            | 6                            | 1                                        | 5                              | 1                                          | 4                                     | 0.23                           | 0.08  |
| END1L_HUMAN           | Endonuclease domain-containing 1 protein                                 | 31                         | 54981              | 5.55            | 3                            | 1                                        | 2                              | 1                                          | 2                                     | 0.12                           | 0.08  |
| PDCL1_HUMAN           | Phosphatidylethanolamine-binding protein 3                               | 31                         | 27597              | 4.78            | 3                            | 1                                        | 3                              | 1                                          | 3                                     | 0.26                           | 0.16  |
| PDCL2_HUMAN           | PTB-containing, coiled-coil and LIM1-interacting protein                 | 31                         | 28353              | 6.23            | 9                            | 1                                        | 4                              | 1                                          | 4                                     | 0.24                           | 0.16  |
| MALD1_HUMAN           | MARVEL domain-containing protein 1                                       | 31                         | 18902              | 9.69            | 1                            | 1                                        | 1                              | 1                                          | 1                                     | 0.17                           | 0.24  |
| KDEL2_HUMAN           | KDEL motif-containing protein 2                                          | 31                         | 58535              | 8.42            | 4                            | 1                                        | 4                              | 1                                          | 4                                     | 0.11                           | 0.07  |
| FUBP1_HUMAN           | For upstream element-binding protein 1                                   | 31                         | 67518              | 7.18            | 6                            | 1                                        | 6                              | 1                                          | 6                                     | 0.15                           | 0.06  |
| MOCS2_HUMAN           | Molybdenum cofactor sulfurylase                                          | 31                         | 88058              | 6.23            | 2                            | 2                                        | 1                              | 1                                          | 1                                     | 0.03                           | 0.04  |
| PTPE1_HUMAN           | Protein-tyrosine phosphatase 2, mitochondrial                            | 31                         | 19181              | 8.85            | 3                            | 1                                        | 2                              | 1                                          | 2                                     | 0.16                           | 0.24  |
| PRD1_HUMAN            | Protein-tyrosine phosphatase 1, mitochondrial                            | 31                         | 17317              | 5.93            | 2                            | 1                                        | 2                              | 1                                          | 2                                     | 0.31                           | 0.27  |
| SPD1_HUMAN            | Serine palmitoyltransferase 1                                            | 31                         | 52710              | 5.72            | 4                            | 1                                        | 4                              | 1                                          | 4                                     | 0.14                           | 0.08  |
| FUBP3_HUMAN           | For upstream element-binding protein 3                                   | 31                         | 61002              | 8.8             | 5                            | 3                                        | 3                              | 2                                          | 3                                     | 0.12                           | 0.15  |

<sup>a</sup>Protein score is calculated from the score of the peptide attributed to the protein.

<sup>b</sup>pI is (Predicted) isoelectric point.

<sup>c</sup>Number of matches is spectrum number matched to protein<sup>h</sup>.

<sup>d</sup>Number of significant matches is spectrum number that matches protein and exceeds the identification criteria.

<sup>e</sup>Number of sequences is number of peptides matched to protein<sup>h</sup>.

<sup>f</sup>Number of significant sequences is number of peptides exceeding the identification criteria matched to proteins.

<sup>g</sup>Number of unique sequences is a unique<sup>h</sup> number of peptides matched to proteins.

<sup>h</sup>Sequence coverage is the ratio of the total number of matched peptide residues to the total length of the protein.

<sup>i</sup>Exponentially Modified Protein Abundance Index (http://www.matrixscience.com/help/quant\_empai\_help.html).

Table S2, Cont 11.

| UniProt/Swiss-<br>PROT ID | Description                                                             | Protein score <sup>a</sup> | Protein mass (kDa) | pI <sup>b</sup> | Num, of matches <sup>c</sup> | Num, of significant matches <sup>d</sup> | Num, of sequences <sup>e</sup> | Num, of significant sequences <sup>f</sup> | Num, of unique sequences <sup>g</sup> | Sequence coverage <sup>h</sup> | empAI <sup>i</sup> |
|---------------------------|-------------------------------------------------------------------------|----------------------------|--------------------|-----------------|------------------------------|------------------------------------------|--------------------------------|--------------------------------------------|---------------------------------------|--------------------------------|--------------------|
| TIM23L1_HUMAN             | Transmembrane protein 214                                               | 30                         | 7160               | 5.25            | 4                            | 1                                        | 1                              | 1                                          | 1                                     | 0.1                            | 0.2                |
| DHBI1_HUMAN               | Estradiol 17-β-Hydroxysteroid oxidase 11                                | 30                         | 32915              | 9.2             | 4                            | 1                                        | 4                              | 1                                          | 4                                     | 0.18                           | 0.13               |
| TIM23L2_HUMAN             | Putative mitochondrial import inner membrane translocase subunit Tim23B | 30                         | 28030              | 9.47            | 2                            | 1                                        | 2                              | 1                                          | 2                                     | 0.21                           | 0.16               |
| TIM22_HUMAN               | Translocase between the protein 2                                       | 30                         | 48760              | 8.55            | 3                            | 1                                        | 2                              | 1                                          | 2                                     | 0.08                           | 0.09               |
| TXIP1_HUMAN               | Tricarbaldehyde transport protein, mitochondrial                        | 30                         | 33991              | 9.91            | 8                            | 2                                        | 4                              | 1                                          | 4                                     | 0.2                            | 0.28               |
| PHB2_HUMAN                | GTP-binding protein Phb2                                                | 30                         | 20480              | 5.85            | 2                            | 2                                        | 1                              | 1                                          | 1                                     | 0.14                           | 0.22               |
| SCD16A_HUMAN              | Protein transport protein SCD16A                                        | 30                         | 23373              | 5.4             | 5                            | 1                                        | 4                              | 1                                          | 4                                     | 0.05                           | 0.02               |
| TBCD2_HUMAN               | Tubulin-specific chaperone D                                            | 30                         | 122515             | 5.8             | 2                            | 1                                        | 1                              | 1                                          | 1                                     | 0.02                           | 0.03               |
| NUE1A_HUMAN               | Nuclear pore complex protein Nue1A                                      | 29                         | 213468             | 7.55            | 4                            | 1                                        | 3                              | 1                                          | 3                                     | 0.02                           | 0.02               |
| QLIP1_HUMAN               | Qlms pathogenesis-related protein 1                                     | 29                         | 30346              | 8.8             | 1                            | 1                                        | 1                              | 1                                          | 1                                     | 0.09                           | 0.15               |
| DHRS1_HUMAN               | Dehydrogenase 1, reductase SDR family member 1                          | 29                         | 33887              | 6.01            | 2                            | 2                                        | 1                              | 1                                          | 1                                     | 0.06                           | 0.13               |
| KPCA_HUMAN                | Protein kinase C-α-like type 1                                          | 29                         | 76700              | 6.61            | 3                            | 1                                        | 3                              | 1                                          | 3                                     | 0.1                            | 0.06               |
| RNAS2_HUMAN               | Rna-related protein Rcras2                                              | 29                         | 23385              | 5.74            | 4                            | 1                                        | 3                              | 1                                          | 3                                     | 0.25                           | 0.19               |
| MBRL1_HUMAN               | Muscleblind-like protein 1                                              | 29                         | 41780              | 5.16            | 2                            | 1                                        | 2                              | 1                                          | 2                                     | 0.13                           | 0.1                |
| ERAP1_HUMAN               | Endoplasmic reticulum aminopeptidase 1                                  | 29                         | 107168             | 6.02            | 4                            | 1                                        | 3                              | 1                                          | 3                                     | 0.08                           | 0.04               |
| ACOT1_HUMAN               | Acyl-CoA:oxoacyl-Ac-Hydroxylase 13                                      | 29                         | 14951              | 9.23            | 1                            | 1                                        | 1                              | 1                                          | 1                                     | 0.13                           | 0.21               |
| TREML1_HUMAN              | Tumor necrosis factor-α-like-induced protein 3-like protein 3           | 29                         | 35639              | 6.75            | 3                            | 1                                        | 2                              | 1                                          | 2                                     | 0.15                           | 0.14               |
| EMUL_HUMAN                | Emerin                                                                  | 29                         | 28978              | 5.29            | 3                            | 2                                        | 3                              | 2                                          | 3                                     | 0.24                           | 0.33               |
| LAMB1_HUMAN               | Lamin B subunit beta-1                                                  | 29                         | 187069             | 4.83            | 15                           | 2                                        | 11                             | 2                                          | 11                                    | 0.15                           | 0.04               |
| ITMBP_HUMAN               | Integral membrane protein 2B                                            | 29                         | 30318              | 5               | 2                            | 1                                        | 2                              | 1                                          | 2                                     | 0.15                           | 0.15               |
| PURA_HUMAN                | Phosphoribosylformylglycineamide synthase                               | 29                         | 144643             | 5.5             | 6                            | 1                                        | 6                              | 1                                          | 6                                     | 0.13                           | 0.03               |
| RAD2_HUMAN                | RAD2 family molecule-chaperone regulator 2                              | 29                         | 23757              | 6.25            | 5                            | 1                                        | 4                              | 1                                          | 4                                     | 0.24                           | 0.19               |
| IAHL1_HUMAN               | Isomyl acetate-hydroxylase esterase 1 homolog                           | 29                         | 27581              | 5.13            | 3                            | 1                                        | 2                              | 1                                          | 2                                     | 0.17                           | 0.16               |
| GCSF_HUMAN                | G-CSF cleavage system H protein, mitochondrial                          | 28                         | 18873              | 4.81            | 2                            | 1                                        | 2                              | 1                                          | 2                                     | 0.29                           | 0.24               |
| MSL1_HUMAN                | Mitochondrial lipase                                                    | 28                         | 32640              | 6.99            | 3                            | 1                                        | 2                              | 1                                          | 2                                     | 0.13                           | 0.12               |
| GOLPH_HUMAN               | Gammaglutamyl hydrolase                                                 | 28                         | 35941              | 6.67            | 1                            | 1                                        | 1                              | 1                                          | 1                                     | 0.08                           | 0.12               |
| ARH1A_HUMAN               | Arlylin repeat domain-containing protein 13A                            | 28                         | 17577              | 4.84            | 1                            | 1                                        | 1                              | 1                                          | 1                                     | 0.04                           | 0.06               |
| CSN8_HUMAN                | COP9 signalosome complex subunit 8                                      | 28                         | 23211              | 5.25            | 1                            | 1                                        | 1                              | 1                                          | 1                                     | 0.14                           | 0.19               |
| LPSX_HUMAN                | Leucosin                                                                | 28                         | 43304              | 5.62            | 1                            | 1                                        | 1                              | 1                                          | 1                                     | 0.05                           | 0.1                |
| MACT1_HUMAN               | Microtubule-actin cross-linking factor 1, isoform 1/2/3/5               | 28                         | 83787              | 5.26            | 31                           | 2                                        | 27                             | 26                                         | 1                                     | 0.08                           | 0.01               |
| LMKD1_HUMAN               | LM and cysteine-rich domain protein 1                                   | 28                         | 40806              | 8.27            | 6                            | 1                                        | 6                              | 1                                          | 6                                     | 0.28                           | 0.11               |
| DPHVL1_HUMAN              | 2'-deoxyriboflavin 5'-phosphate 1-phosphatase 1                         | 28                         | 10097              | 4.67            | 3                            | 3                                        | 3                              | 3                                          | 3                                     | 0.26                           | 0.21               |
| DUC1_HUMAN                | DnaJ homolog subfamily C member 11                                      | 28                         | 63239              | 8.04            | 7                            | 1                                        | 4                              | 1                                          | 4                                     | 0.13                           | 0.07               |
| PTCD3_HUMAN               | Pentatricopeptide repeat domain-containing protein 3, mitochondrial     | 28                         | 78500              | 6               | 4                            | 1                                        | 3                              | 1                                          | 3                                     | 0.07                           | 0.05               |
| ZFYVL1_HUMAN              | Zinc finger FYVE domain-containing protein 1                            | 28                         | 81729              | 7.29            | 1                            | 1                                        | 1                              | 1                                          | 1                                     | 0.17                           | 0.24               |
| COG2_HUMAN                | Conserved oligomeric Golgi complex subunit 3                            | 27                         | 94038              | 5.39            | 2                            | 1                                        | 2                              | 1                                          | 2                                     | 0.07                           | 0.05               |
| KOL1A_HUMAN               | Camptothecin                                                            | 27                         | 21712              | 6.12            | 2                            | 2                                        | 2                              | 2                                          | 2                                     | 0.12                           | 0.48               |
| EMAL1_HUMAN               | Echinoderm microtubule-associated protein-like 4                        | 27                         | 10848              | 5.96            | 3                            | 1                                        | 3                              | 1                                          | 3                                     | 0.08                           | 0.04               |
| CSN1_HUMAN                | COP9 signalosome complex subunit 1                                      | 27                         | 55501              | 6.3             | 5                            | 2                                        | 3                              | 2                                          | 3                                     | 0.12                           | 0.16               |
| FADD_HUMAN                | FAS-associated death domain protein                                     | 27                         | 31935              | 5.48            | 3                            | 1                                        | 4                              | 1                                          | 4                                     | 0.12                           | 0.19               |
| MA3B1_HUMAN               | Lysosomal alpha-mannosidase                                             | 27                         | 113672             | 6.84            | 9                            | 2                                        | 7                              | 2                                          | 7                                     | 0.14                           | 0.08               |
| DOX33_HUMAN               | Probable ATP-dependent RNA helicase DOX33                               | 27                         | 156331             | 6.23            | 7                            | 1                                        | 6                              | 1                                          | 6                                     | 0.11                           | 0.04               |
| SRR1_HUMAN                | Signal recognition particle 14 kDa protein                              | 27                         | 14561              | 10.05           | 1                            | 1                                        | 1                              | 1                                          | 1                                     | 0.46                           | 0.32               |
| VP33A_HUMAN               | Vacuolar protein sorting-associated protein 33A                         | 27                         | 67568              | 6.5             | 4                            | 2                                        | 3                              | 1                                          | 3                                     | 0.08                           | 0.06               |
| CLND2_HUMAN               | Clatrin                                                                 | 26                         | 47592              | 5.93            | 1                            | 1                                        | 1                              | 1                                          | 1                                     | 0.05                           | 0.09               |
| GMPR2_HUMAN               | GMP reductase 2                                                         | 26                         | 37850              | 6.79            | 5                            | 1                                        | 4                              | 1                                          | 4                                     | 0.21                           | 0.12               |
| PUS2_HUMAN                | Phosphatidyl seramitase 3                                               | 26                         | 31626              | 6.22            | 2                            | 1                                        | 2                              | 1                                          | 2                                     | 0.19                           | 0.14               |
| POC2L_HUMAN               | Protein POC2L C-terminal domain enhancer 1                              | 26                         | 17942              | 7.41            | 2                            | 2                                        | 2                              | 2                                          | 2                                     | 0.12                           | 0.19               |
| MUC12_HUMAN               | Cell surface glycoprotein MUC12                                         | 26                         | 71563              | 5.58            | 4                            | 1                                        | 4                              | 1                                          | 4                                     | 0.13                           | 0.06               |
| YELC1_HUMAN               | Tyrosine phosphatase Yelc1                                              | 26                         | 60763              | 6.22            | 5                            | 1                                        | 4                              | 1                                          | 4                                     | 0.12                           | 0.07               |
| HDA6L_HUMAN               | Histone deacetylase 6                                                   | 26                         | 131338             | 5.14            | 1                            | 1                                        | 1                              | 1                                          | 1                                     | 0.02                           | 0.03               |
| PHM2_HUMAN                | Phosphomannomutase 2                                                    | 26                         | 26064              | 6.35            | 4                            | 1                                        | 2                              | 1                                          | 2                                     | 0.1                            | 0.16               |
| DIST1_HUMAN               | Dystonin                                                                | 26                         | 860127             | 5.14            | 30                           | 2                                        | 27                             | 2                                          | 27                                    | 0.07                           | 0.01               |
| GQR1_HUMAN                | Oxycytochrome b-co1 complex subunit 1, mitochondrial                    | 26                         | 52612              | 5.94            | 6                            | 1                                        | 5                              | 1                                          | 5                                     | 0.19                           | 0.08               |
| DOX5_HUMAN                | Probable ATP-dependent RNA helicase DOX5                                | 26                         | 69106              | 5.96            | 7                            | 2                                        | 5                              | 2                                          | 4                                     | 0.14                           | 0.13               |
| DAB2_HUMAN                | Dab2-related protein 2                                                  | 26                         | 6230               | 5.34            | 3                            | 1                                        | 2                              | 1                                          | 2                                     | 0.08                           | 0.05               |
| HSD12L_HUMAN              | Hydroxysteroid dehydrogenase-like protein 2                             | 26                         | 45386              | 6.07            | 7                            | 1                                        | 6                              | 1                                          | 6                                     | 0.26                           | 0.1                |
| TRITVL_HUMAN              | Tryptic acid neutralizing factor protein 10-like protein                | 25                         | 40280              | 5.86            | 1                            | 1                                        | 1                              | 1                                          | 1                                     | 0.07                           | 0.11               |
| F12R2_HUMAN               | Protein FAM122B                                                         | 25                         | 26811              | 5.88            | 1                            | 1                                        | 1                              | 1                                          | 1                                     | 0.09                           | 0.17               |
| FBN1_HUMAN                | Fibrillin-1                                                             | 25                         | 310022             | 4.81            | 23                           | 1                                        | 18                             | 1                                          | 18                                    | 0.13                           | 0.01               |
| PSPL1_HUMAN               | Proteinase associated protein 1                                         | 25                         | 55825              | 6.41            | 1                            | 1                                        | 1                              | 1                                          | 1                                     | 0.06                           | 0.08               |
| GOGB1_HUMAN               | Golgi subunit B member 1                                                | 25                         | 375700             | 4.96            | 25                           | 1                                        | 21                             | 1                                          | 21                                    | 0.1                            | 0.01               |
| APBDC1_HUMAN              | DNA GTP-binding domain protein APBDC1-3C                                | 25                         | 23811              | 7.52            | 2                            | 1                                        | 2                              | 1                                          | 2                                     | 0.16                           | 0.2                |
| SDP2_HUMAN                | Stronal cell-derived factor 2                                           | 25                         | 23011              | 6.83            | 3                            | 2                                        | 2                              | 1                                          | 2                                     | 0.26                           | 0.2                |
| COA1A_HUMAN               | Collagen alpha1(VI) chain                                               | 25                         | 73317              | 9.62            | 4                            | 1                                        | 3                              | 1                                          | 3                                     | 0.11                           | 0.06               |
| DHRS4_HUMAN               | Dehydrogenase 1, reductase SDR family member 4                          | 25                         | 38510              | 6.81            | 3                            | 1                                        | 3                              | 1                                          | 3                                     | 0.15                           | 0.1                |
| PCFR1_HUMAN               | Phorbol-12-myristate-13-acetate receptor beta                           | 25                         | 123889             | 4.88            | 6                            | 1                                        | 5                              | 1                                          | 4                                     | 0.08                           | 0.03               |
| TAL1_HUMAN                | Nucleosome TAD-1 isoform p40                                            | 25                         | 42038              | 7.68            | 1                            | 1                                        | 1                              | 1                                          | 1                                     | 0.1                            | 0.1                |
| OPN1_HUMAN                | Avian osteon                                                            | 25                         | 33561              | 5.44            | 1                            | 1                                        | 1                              | 1                                          | 1                                     | 0.09                           | 0.13               |
| ATOX1_HUMAN               | Copper transport protein ATOX1                                          | 24                         | 7397               | 6.71            | 7                            | 1                                        | 4                              | 1                                          | 4                                     | 0.66                           | 0.71               |
| MCAT_HUMAN                | Mitochondrial carnitine acyltransferase carrier protein                 | 24                         | 35922              | 6.48            | 3                            | 1                                        | 3                              | 1                                          | 3                                     | 0.09                           | 0.04               |
| MPPL1_HUMAN               | Mitochondrial processing peptidase subunit beta                         | 24                         | 54331              | 6.38            | 6                            | 1                                        | 4                              | 1                                          | 4                                     | 0.17                           | 0.08               |
| RAD2A_HUMAN               | RAD2 family molecule-chaperone regulator 2                              | 24                         | 26071              | 6.1             | 7                            | 1                                        | 6                              | 1                                          | 6                                     | 0.24                           | 0.11               |
| EPPL2_HUMAN               | Ectopic P granule protein 5 homolog                                     | 24                         | 292293             | 5.09            | 5                            | 1                                        | 5                              | 1                                          | 5                                     | 0.04                           | 0.01               |
| GPTCL1_HUMAN              | Glycyl-L-proline oxidoreductase-like protein                            | 24                         | 42897              | 9.84            | 1                            | 1                                        | 1                              | 1                                          | 1                                     | 0.09                           | 0.1                |
| ADAS1_HUMAN               | Adipocyte triglyceride lipase protein, peroxisomal                      | 24                         | 12685              | 5.99            | 2                            | 1                                        | 2                              | 1                                          | 2                                     | 0.08                           | 0.06               |
| MAP1S_HUMAN               | Microtubule-associated protein 1S                                       | 24                         | 112142             | 6.92            | 3                            | 1                                        | 2                              | 1                                          | 2                                     | 0.03                           | 0.04               |
| ABCD3_HUMAN               | ATP-binding cassette subfamily D member 3                               | 24                         | 74026              | 5.41            | 6                            | 1                                        | 4                              | 1                                          | 4                                     | 0.12                           | 0.06               |
| MPRE1_HUMAN               | Menin phosphatase RhoGAP-like protein                                   | 24                         | 16461              | 5.88            | 8                            | 1                                        | 8                              | 1                                          | 8                                     | 0.14                           | 0.08               |
| DOX1_HUMAN                | Deoxyribose deaminase                                                   | 24                         | 20003              | 7.49            | 1                            | 1                                        | 1                              | 1                                          | 1                                     | 0.1                            | 0.23               |
| ACOT11_HUMAN              | Acyl-CoA:oxoacyl-Ac-Hydroxylase 11                                      | 23                         | 42648              | 6.9             | 2                            | 1                                        | 2                              | 1                                          | 2                                     | 0.2                            | 0.2                |
| AIMP1_HUMAN               | Aminoacyl-tRNA synthase complex-interacting multifunctional protein 1   | 23                         | 34331              | 6.81            | 7                            | 1                                        | 6                              | 1                                          | 6                                     | 0.37                           | 0.13               |
| BICO2_HUMAN               | Protein bicoid/D homolog 2                                              | 23                         | 94476              | 5.35            | 5                            | 1                                        | 4                              | 1                                          | 4                                     | 0.08                           | 0.05               |
| MTCH2_HUMAN               | Mitochondrial carrier homolog 2                                         | 23                         | 33309              | 8.25            | 2                            | 1                                        | 2                              | 1                                          | 2                                     | 0.1                            | 0.13               |
| MAOM1_HUMAN               | NAD-dependent male enzyme, mitochondrial                                | 23                         | 65402              | 7.53            | 6                            | 1                                        | 6                              | 1                                          | 6                                     | 0.27                           | 0.07               |
| PGSV1_HUMAN               | P53 proteasome non-ATPase regulatory subunit 10                         | 23                         | 24412              | 5.71            | 8                            | 1                                        | 4                              | 1                                          | 4                                     | 0.24                           | 0.18               |
| PCAT2_HUMAN               | Lysophosphatidylcholine acyltransferase 2                               | 23                         | 60169              | 6.14            | 4                            | 1                                        | 3                              | 1                                          | 3                                     | 0.06                           | 0.07               |
| RUG2A_HUMAN               | U2 small nuclear ribonucleoprotein A'                                   | 23                         | 26396              | 8.27            | 1                            | 1                                        | 1                              | 1                                          | 1                                     | 0.1                            | 0.16               |
| LTOR1_HUMAN               | Regulator complex protein-LAMTOR1                                       | 23                         | 17754              | 5.01            | 5                            | 1                                        | 4                              | 1                                          | 4                                     | 0.48                           | 0.26               |
| CYR11_HUMAN               | Protein CYR11                                                           | 23                         | 41998              | 8.64            | 6                            | 1                                        | 5                              | 1                                          | 5                                     | 0.19                           | 0.1                |
| DHX29_HUMAN               | ATP-dependent RNA helicase DHX29                                        | 22                         | 155138             | 6.3             | 7                            | 1                                        | 6                              | 1                                          | 6                                     | 0.08                           | 0.03               |
| DC_HUMAN                  | DnaJ-like-binding enzyme                                                | 22                         | 117802             | 6.11            | 1                            | 1                                        | 1                              | 1                                          | 1                                     | 0.02                           | 0.04               |
| PGH1_HUMAN                | Prostaglandin G/H synthase 1                                            | 22                         | 68642              | 6.81            | 3                            | 1                                        | 3                              | 1                                          | 3                                     | 0.1                            | 0.06               |
| NRE2_HUMAN                | NAD(P)+-hydroxylase                                                     | 22                         | 31054              | 5.66            | 1                            | 1                                        | 1                              | 1                                          | 1                                     | 0.14                           | 0.14               |
| LOBP2_HUMAN               | Gulonic-3-β-oxidizing protein                                           | 22                         | 65289              | 5.13            | 2                            | 1                                        | 1                              | 1                                          | 1                                     | 0.03                           | 0.07               |
| SLC10A_HUMAN              | Solute carrier family 10 member 5                                       | 22                         | 100890             | 6.54            | 3                            | 1                                        | 3                              | 1                                          | 3                                     | 0.09                           | 0.04               |
| ELMO2_HUMAN               | ELMO domain-containing protein 2                                        | 22                         | 34938              | 6.11            | 9                            | 1                                        | 6                              | 1                                          | 6                                     | 0.31                           | 0.13               |
| RAGP1_HUMAN               | Ran GTPase-activating protein 1                                         | 22                         | 63502              | 4.83            | 4                            | 1                                        | 4                              | 1                                          | 4                                     | 0.11                           | 0.07               |
| NCCH1_HUMAN               | Neurofilament cation hydrolase 1                                        | 22                         | 45779              | 6.76            | 2                            | 1                                        | 1                              | 1                                          | 1                                     | 0.07                           | 0.1                |
| EDC4_HUMAN                | Enhancer of rRNA-decapping protein 4                                    | 21                         | 151597             | 5.05            | 5                            | 1                                        | 5                              | 1                                          | 5                                     | 0.09                           | 0.03               |

<sup>a</sup>Protein score is calculated from the score of the peptide attributed to the protein.

<sup>b</sup>pI is (Predicted) isoelectric point.

<sup>c</sup>Number of matches is spectrum number matched to protein<sup>1</sup>.

<sup>d</sup>Number of significant matches is spectrum number that matches protein and exceeds the identification criteria.

<sup>e</sup>Number of sequences is number of peptides matched to protein<sup>1</sup>.

<sup>f</sup>Number of significant sequences is number of peptides exceeding the identification criteria matched to proteins.

<sup>g</sup>Number of unique sequences is a unique<sup>6</sup> number of peptides matched to proteins.

<sup>h</sup>Sequence coverage is the ratio of the total number of matched peptide residues to the total length of the protein.

<sup>i</sup>Exponentially Modified Protein Abundance Index (http://www.matrixscience.com/help/quant\_help.html).

Table S2, Cont 12.

| UniProt/Swiss-PROT ID | Description                                               | Protein score <sup>a</sup> | Protein mass (kDa) | pI <sup>b</sup> | Num, of matches <sup>c</sup> | Num, of significant matches <sup>d</sup> | Num, of sequences <sup>e</sup> | Num, of significant sequences <sup>f</sup> | Num, of unique sequences <sup>g</sup> | Sequence coverage <sup>h</sup> | emPAI <sup>i</sup> |
|-----------------------|-----------------------------------------------------------|----------------------------|--------------------|-----------------|------------------------------|------------------------------------------|--------------------------------|--------------------------------------------|---------------------------------------|--------------------------------|--------------------|
| PRR1L1_HUMAN          | Proteinase                                                | 21                         | 97305              | 5.28            | 1                            | 1                                        | 1                              | 1                                          | 1                                     | 0.1                            | 0.06               |
| MANF_HUMAN            | Mesencephalic astrocyte-derived neurotrophic factor       | 21                         | 20687              | 8.93            | 5                            | 1                                        | 2                              | 1                                          | 2                                     | 0.16                           | 0.22               |
| SGSH_HUMAN            | Sirt3-sirtuin                                             | 21                         | 34755              | 8.86            | 2                            | 1                                        | 2                              | 1                                          | 2                                     | 0.11                           | 0.13               |
| YDF3_HUMAN            | Protein YDF3                                              | 20                         | 38223              | 5.47            | 1                            | 1                                        | 1                              | 1                                          | 1                                     | 0.08                           | 0.11               |
| UBPL2_HUMAN           | Ubiquitin-associated protein 2-like                       | 20                         | 114465             | 6.61            | 9                            | 1                                        | 5                              | 1                                          | 5                                     | 0.1                            | 0.04               |
| TWIST1_HUMAN          | Twist-related protein 1                                   | 19                         | 69390              | 9.1             | 2                            | 1                                        | 2                              | 1                                          | 2                                     | 0.08                           | 0.08               |
| PAWR_HUMAN            | PRK4 apoptosis W171 regulator protein                     | 19                         | 36545              | 5.35            | 1                            | 1                                        | 1                              | 1                                          | 1                                     | 0.05                           | 0.12               |
| MCU_HUMAN             | Calcium uniporter protein, mitochondrial                  | 19                         | 39842              | 8.83            | 4                            | 1                                        | 3                              | 1                                          | 3                                     | 0.16                           | 0.11               |
| SSS4_HUMAN            | Saltin carrier family 25 member 46                        | 19                         | 46145              | 6.97            | 3                            | 1                                        | 1                              | 1                                          | 1                                     | 0.06                           | 0.08               |
| HGI1A_HUMAN           | HGI domain family member 1A, mitochondrial                | 19                         | 10136              | 9.79            | 1                            | 1                                        | 1                              | 1                                          | 1                                     | 0.24                           | 0.49               |
| CRP2_HUMAN            | Crotonylpeptide G                                         | 19                         | 91855              | 5.79            | 1                            | 1                                        | 1                              | 1                                          | 1                                     | 0.027                          | 0.08               |
| FNCL2_HUMAN           | Fibrinogen type II domain-containing protein 3B           | 19                         | 32903              | 5.64            | 7                            | 1                                        | 7                              | 1                                          | 7                                     | 0.1                            | 0.03               |
| VTG1A_HUMAN           | Vacuolar protein sorting-associated protein, VTI1 homolog | 18                         | 33858              | 5.87            | 5                            | 1                                        | 3                              | 1                                          | 3                                     | 0.16                           | 0.13               |
| MAES1_HUMAN           | Measles virus-associated protein RP (EB) family member 3  | 17                         | 31982              | 5.23            | 2                            | 1                                        | 2                              | 1                                          | 2                                     | 0.11                           | 0.14               |
| DNARE1_HUMAN          | ATP-dependent RNA polymerase DNARE1                       | 15                         | 16668              | 7.88            | 1                            | 1                                        | 1                              | 1                                          | 1                                     | 0.03                           | 0.03               |

**Table S3.** Identification of endogenous proteins (Biological Process: growth) in hADSC; group CDM & DMEM.

**Table S3.** Identification of endogenous proteins (Biological Process: growth) in hADSC; group CDM & DMEM.

| UniProt/SWISS-<br>Alternate ID | Biological Process<br>growth                                         | emPAI <sup>a</sup> |         |
|--------------------------------|----------------------------------------------------------------------|--------------------|---------|
|                                |                                                                      | CDM                | DMEM    |
| VIM                            | skeletal muscle tissue regeneration                                  | 588.33             | 1108.52 |
| TUBB6                          | seed trichome elongation                                             | 488.41             | 682.32  |
| IQGAP1                         | neuron projection extension                                          | 101.79             | 191.57  |
| VCL                            | axon extension                                                       | 47.63              | 161.43  |
| ANXA1                          | myoblast migration involved in skeletal muscle regeneration          | 51.36              | 88.25   |
| MAP1B                          | axon extension                                                       | 20.55              | 139.91  |
| ATP5A1                         | growth                                                               | 44.83              | 92.56   |
| MYL9                           | cell elongation involved in imaginal disc-derived wing morphogenesis | 40.16              | 92.56   |
| PSAP                           | prostate gland growth                                                | 38.29              | 55.96   |
| CLIC4                          | multicellular organism growth                                        | 19.61              | 71.03   |
| GNAI2                          | multicellular organism growth                                        | 26.15              | 55.96   |
| GNAS                           | developmental growth, multicellular organism growth                  | 1.87               | 17.22   |
| ITGB1                          | axon extension                                                       | 24.28              | 55.96   |
| MAPK1                          | endochondral bone growth                                             | 22.41              | 34.44   |
| RAB10                          | pollen tube growth                                                   | 15.88              | 64.57   |
| ATP6V1A                        | imaginal disc growth                                                 | 10.27              | 66.73   |
| TNC                            | bud outgrowth involved in lung branching                             | 5.60               | 75.34   |
| ITGAV                          | cell growth                                                          | 3.74               | 43.05   |
| EIF4H                          | developmental growth                                                 | 14.94              | 21.52   |
| MTPN                           | cell growth, skeletal muscle tissue regeneration                     | 18.68              | 10.76   |
| POSTN                          | bone regeneration, neuron projection extension                       | 14.01              | 23.68   |
| SLC3A2                         | cell growth                                                          | 1.87               | 43.05   |
| PAK2                           | budding cell apical bud growth                                       | 12.14              | 10.76   |
| SEC61A1                        | cell growth                                                          | 14.94              | 10.76   |
| CDC42                          | multicellular organism growth                                        | 10.27              | 17.22   |
| CPNE1                          | neuron projection extension                                          | 12.14              | 10.76   |
| GPX1                           | skeletal muscle tissue regeneration                                  | 3.74               | 12.91   |
| PTK7                           | axis elongation                                                      | 0.93               | 21.52   |
| TRIM28                         | convergent extension involved in axis elongation                     | 6.54               | 10.76   |
| TMED2                          | multicellular organism growth                                        | 4.67               | 12.91   |
| PRKAR1A                        | cardiac muscle cell proliferation                                    | 5.60               | 10.76   |

<sup>a</sup>Exponentially Modified Protein Abundance Index ([http://www.matrixscience.com/help/quant\\_empai\\_help.html](http://www.matrixscience.com/help/quant_empai_help.html)).

**Table S4.** Identification of endogenous proteins (Molecular Function: antioxidant activity) in hADSC; group CDM & DMEM.

**Table S4.** Identification of endogenous proteins (Molecular Function: antioxidant activity) in hADSC; group CDM & DMEM.

| UniProt/SWISS-<br>Alternate ID | Molecular Function<br>antioxidant activity                                                         | emPAI <sup>a</sup> |        |
|--------------------------------|----------------------------------------------------------------------------------------------------|--------------------|--------|
|                                |                                                                                                    | CDM                | DMEM   |
| ALB                            | antioxidant activity                                                                               | 698.52             | 47.35  |
| GSTP1                          | glutathione peroxidase activity                                                                    | 58.83              | 124.84 |
| PRDX6                          | antioxidant activity, glutathione peroxidase activity, peroxidase activity, peroxiredoxin activity | 48.56              | 64.57  |
| PARK7                          | peroxiredoxin activity                                                                             | 30.82              | 51.66  |
| PRDX1                          | peroxidase activity, peroxiredoxin activity, thioredoxin peroxidase activity                       | 38.29              | 60.27  |
| GSTO1                          | glutathione dehydrogenase (ascorbate) activity                                                     | 26.15              | 30.13  |
| PRDX4                          | antioxidant activity, peroxidase activity, peroxiredoxin activity, thioredoxin peroxidase activity | 20.55              | 60.27  |
| PRDX5                          | peroxidase activity, peroxynitrite reductase activity, thioredoxin peroxidase activity             | 14.01              | 49.51  |
| TXNRD1                         | thioredoxin-disulfide reductase activity                                                           | 2.80               | 66.73  |
| PRDX2                          | antioxidant activity, peroxidase activity, peroxiredoxin activity, thioredoxin peroxidase activity | 11.21              | 19.37  |
| TXNDC17                        | peroxidase activity                                                                                | 5.60               | 21.52  |
| GSTK1                          | glutathione peroxidase activity                                                                    | 6.54               | 15.07  |
| PRDX3                          | peroxidase activity, peroxiredoxin activity, thioredoxin peroxidase activity                       | 7.47               | 12.91  |
| MGST1                          | glutathione peroxidase activity                                                                    | 8.40               | 10.76  |
| GPX1                           | glutathione peroxidase activity                                                                    | 3.74               | 12.91  |
| SOD1                           | superoxide dismutase activity                                                                      | 4.67               | 15.07  |

<sup>a</sup>Exponentially Modified Protein Abundance Index ([http://www.matrixscience.com/help/quant\\_empai\\_help.html](http://www.matrixscience.com/help/quant_empai_help.html)).



**Table S5.** Identification of endogenous proteins (Biological Process: immune system process) in hADSC; group CDM & DMEM.

| UniProt/Swiss-Prot                                                                                                                                                    |                                                                                                                                                                                                                                                                                             | Biological Process    |  | empAI <sup>2</sup> |        |
|-----------------------------------------------------------------------------------------------------------------------------------------------------------------------|---------------------------------------------------------------------------------------------------------------------------------------------------------------------------------------------------------------------------------------------------------------------------------------------|-----------------------|--|--------------------|--------|
| Accession ID                                                                                                                                                          |                                                                                                                                                                                                                                                                                             | Immune system process |  | CDM                | DMEM   |
| TUBB8                                                                                                                                                                 | natural killer cell mediated cytotoxicity                                                                                                                                                                                                                                                   |                       |  | 488.41             | 882.32 |
| TUBB8                                                                                                                                                                 | natural killer cell mediated cytotoxicity                                                                                                                                                                                                                                                   |                       |  | 384.44             | 388.89 |
| TUBB8B                                                                                                                                                                | natural killer cell mediated cytotoxicity                                                                                                                                                                                                                                                   |                       |  | 388.89             | 388.89 |
| MYH9                                                                                                                                                                  | establishment of T cell polarity, leukocyte migration, monocyte differentiation, platelet formation                                                                                                                                                                                         |                       |  | 586.70             | 951.89 |
| HSP90A1                                                                                                                                                               | IFN-gamma receptor signaling pathway involved in phagocytosis, toll-like receptor signaling pathway                                                                                                                                                                                         |                       |  | 439.85             | 454.16 |
| HSP90A1                                                                                                                                                               | toll-like receptor signaling pathway                                                                                                                                                                                                                                                        |                       |  | 97.79              | 159.21 |
| HSP90AA1                                                                                                                                                              | IFN-gamma receptor signaling pathway involved in phagocytosis                                                                                                                                                                                                                               |                       |  | 229.73             | 165.74 |
| ACTN4                                                                                                                                                                 | platelet formation                                                                                                                                                                                                                                                                          |                       |  | 135.41             | 514.44 |
| ACTN1                                                                                                                                                                 | platelet formation                                                                                                                                                                                                                                                                          |                       |  | 166.00             | 179.22 |
| CLTC                                                                                                                                                                  | antigen processing and presentation of exogenous peptide antigen via MHC class II                                                                                                                                                                                                           |                       |  | 163.42             | 243.22 |
| EEF2                                                                                                                                                                  | hematopoietic progenitor cell differentiation                                                                                                                                                                                                                                               |                       |  | 162.49             | 189.42 |
| ANKK2                                                                                                                                                                 | leukocyte development                                                                                                                                                                                                                                                                       |                       |  | 116.73             | 271.25 |
| LGALS1                                                                                                                                                                | T cell costimulation, plasma cell differentiation                                                                                                                                                                                                                                           |                       |  | 118.68             | 180.81 |
| PN1                                                                                                                                                                   | leukocyte migration                                                                                                                                                                                                                                                                         |                       |  | 97.12              | 281.64 |
| DYNCH1H                                                                                                                                                               | antigen processing and presentation of exogenous peptide antigen via MHC class II                                                                                                                                                                                                           |                       |  | 193.66             | 513.33 |
| COL1A1                                                                                                                                                                | leukocyte migration                                                                                                                                                                                                                                                                         |                       |  | 76.88              | 226.00 |
| CAAR                                                                                                                                                                  | antigen processing and presentation of peptide antigen via MHC class I, peptide antigen assembly with MHC class I protein complex                                                                                                                                                           |                       |  | 118.80             | 128.64 |
| PCNA2                                                                                                                                                                 | antigen processing and presentation of peptide antigen via MHC class I                                                                                                                                                                                                                      |                       |  | 84.98              | 142.88 |
| THB1                                                                                                                                                                  | immune response                                                                                                                                                                                                                                                                             |                       |  | 82.18              | 148.82 |
| MEK                                                                                                                                                                   | leukocyte migration                                                                                                                                                                                                                                                                         |                       |  | 68.03              | 139.91 |
| HSPD1                                                                                                                                                                 | B cell cytokine production, B cell proliferation, MyD88-dependent toll-like receptor signaling pathway, T cell activation, isotype switching to IgG isotypes                                                                                                                                |                       |  | 79.38              | 81.78  |
| ARF4                                                                                                                                                                  | antigen processing and presentation of exogenous peptide antigen via MHC class II                                                                                                                                                                                                           |                       |  | 79.38              | 80.27  |
| ARF1                                                                                                                                                                  | antigen processing and presentation of exogenous peptide antigen via MHC class II                                                                                                                                                                                                           |                       |  | 46.89              | 23.68  |
| CTSD                                                                                                                                                                  | antigen processing and presentation of exogenous peptide antigen via MHC class II                                                                                                                                                                                                           |                       |  | 45.16              | 103.22 |
| ANKK1                                                                                                                                                                 | adaptive immune response, alpha-beta T cell differentiation, granulocyte chemotaxis, innate immune response, monocyte chemotaxis, neutrophil clearance, neutrophil homeostasis                                                                                                              |                       |  | 91.36              | 98.29  |
| COL1A2                                                                                                                                                                | leukocyte migration                                                                                                                                                                                                                                                                         |                       |  | 39.82              | 116.39 |
| STAT1                                                                                                                                                                 | defense response to virus, interferon-gamma-mediated signaling pathway, type I interferon signaling pathway                                                                                                                                                                                 |                       |  | 56.97              | 64.07  |
| IFNG                                                                                                                                                                  | cellular response to interferon-gamma                                                                                                                                                                                                                                                       |                       |  | 21.75              | 73.18  |
| CTSB                                                                                                                                                                  | toll-like receptor signaling pathway                                                                                                                                                                                                                                                        |                       |  | 42.02              | 49.90  |
| ACTR3                                                                                                                                                                 | IFN-gamma receptor signaling pathway involved in phagocytosis                                                                                                                                                                                                                               |                       |  | 21.75              | 58.12  |
| PRDC2                                                                                                                                                                 | B cell lineage commitment, T cell differentiation in thymus, T cell lineage commitment, T cell receptor V(D)J recombination, V(D)J recombination, immunoglobulin V(D)J recombination, immunoglobulin production, pro-B cell differentiation, spleen development, thymus development         |                       |  | 41.36              | 154.51 |
| HSPA9                                                                                                                                                                 | erythrocyte differentiation                                                                                                                                                                                                                                                                 |                       |  | 25.95              | 68.81  |
| CANX                                                                                                                                                                  | antigen processing and presentation of exogenous peptide antigen via MHC class II, antigen processing and presentation of peptide antigen via MHC class I                                                                                                                                   |                       |  | 38.82              | 83.01  |
| DP1                                                                                                                                                                   | erythrocyte homeostasis, humoral immune response                                                                                                                                                                                                                                            |                       |  | 41.00              | 69.86  |
| NRCC5                                                                                                                                                                 | hematopoietic stem cell differentiation                                                                                                                                                                                                                                                     |                       |  | 34.05              | 43.05  |
| PRDX1                                                                                                                                                                 | erythrocyte homeostasis, natural killer cell mediated cytotoxicity                                                                                                                                                                                                                          |                       |  | 38.29              | 66.27  |
| EPD1                                                                                                                                                                  | erythrocyte maturation                                                                                                                                                                                                                                                                      |                       |  | 24.28              | 60.27  |
| PEMD2                                                                                                                                                                 | T cell receptor signaling pathway, antigen processing and presentation of exogenous peptide antigen via MHC class I, TAP-dependent, stimulatory C-type lectin receptor signaling pathway                                                                                                    |                       |  | 26.16              | 56.12  |
| PEMD1                                                                                                                                                                 | T cell receptor signaling pathway, antigen processing and presentation of exogenous peptide antigen via MHC class I, TAP-dependent, stimulatory C-type lectin receptor signaling pathway                                                                                                    |                       |  | 24.28              | 66.27  |
| ITGB1                                                                                                                                                                 | B cell differentiation, leukocyte tethering or rolling                                                                                                                                                                                                                                      |                       |  | 41.36              | 154.51 |
| MAKP1                                                                                                                                                                 | B cell receptor signaling pathway, IFN-gamma receptor signaling pathway involved in phagocytosis, T cell receptor signaling pathway, embryonic hematopoiesis, innate immune response, macrophage chemotaxis, microglia differentiation, monocyte chemotaxis, osteoclast development, thymus |                       |  | 22.41              | 24.44  |
| MAKP3                                                                                                                                                                 | IFN-gamma receptor signaling pathway involved in phagocytosis, thymus development                                                                                                                                                                                                           |                       |  | 5.88               | 16.78  |
| RAE15                                                                                                                                                                 | antigen processing and presentation                                                                                                                                                                                                                                                         |                       |  | 15.88              | 24.44  |
| RAE15                                                                                                                                                                 | antigen processing and presentation                                                                                                                                                                                                                                                         |                       |  | 5.88               | 12.91  |
| ACTR2                                                                                                                                                                 | IFN-gamma receptor signaling pathway involved in phagocytosis                                                                                                                                                                                                                               |                       |  | 20.88              | 40.98  |
| ARPC2                                                                                                                                                                 | IFN-gamma receptor signaling pathway involved in phagocytosis                                                                                                                                                                                                                               |                       |  | 25.21              | 45.20  |
| IRF                                                                                                                                                                   | innate immune response, leukocyte migration                                                                                                                                                                                                                                                 |                       |  | 21.75              | 36.13  |
| AP2A1                                                                                                                                                                 | antigen processing and presentation of exogenous peptide antigen via MHC class II                                                                                                                                                                                                           |                       |  | 11.21              | 66.73  |
| AP2A2                                                                                                                                                                 | antigen processing and presentation of exogenous peptide antigen via MHC class II                                                                                                                                                                                                           |                       |  | 4.87               | 27.88  |
| SEC11A                                                                                                                                                                | antigen processing and presentation of exogenous peptide antigen via MHC class I, antigen processing and presentation of peptide antigen via MHC class I                                                                                                                                    |                       |  | 41.36              | 154.51 |
| APF1B1                                                                                                                                                                | antigen processing and presentation of exogenous peptide antigen via MHC class II                                                                                                                                                                                                           |                       |  | 20.88              | 62.42  |
| DOOST                                                                                                                                                                 | T cell activation                                                                                                                                                                                                                                                                           |                       |  | 21.48              | 36.89  |
| IRF7                                                                                                                                                                  | hemopoiesis                                                                                                                                                                                                                                                                                 |                       |  | 26.16              | 37.88  |
| DYNCH2                                                                                                                                                                | antigen processing and presentation of exogenous peptide antigen via MHC class II                                                                                                                                                                                                           |                       |  | 26.16              | 23.68  |
| IPD7                                                                                                                                                                  | innate immune response                                                                                                                                                                                                                                                                      |                       |  | 18.88              | 36.89  |
| CTSK                                                                                                                                                                  | toll-like receptor signaling pathway                                                                                                                                                                                                                                                        |                       |  | 26.16              | 12.91  |
| SLC1                                                                                                                                                                  | leukocyte migration                                                                                                                                                                                                                                                                         |                       |  | 14.01              | 36.59  |
| MYO1C                                                                                                                                                                 | IFN-gamma receptor signaling pathway involved in phagocytosis                                                                                                                                                                                                                               |                       |  | 17.74              | 46.90  |
| ACTR1A                                                                                                                                                                | antigen processing and presentation of exogenous peptide antigen via MHC class II                                                                                                                                                                                                           |                       |  | 16.88              | 24.44  |
| PSMA4                                                                                                                                                                 | T cell receptor signaling pathway, antigen processing and presentation of exogenous peptide antigen via MHC class I, TAP-dependent, stimulatory C-type lectin receptor signaling pathway                                                                                                    |                       |  | 15.88              | 26.74  |
| ARPC18                                                                                                                                                                | IFN-gamma receptor signaling pathway involved in phagocytosis                                                                                                                                                                                                                               |                       |  | 15.88              | 36.74  |
| ICBP2                                                                                                                                                                 | adaptive immune response, complement activation, classical pathway, innate immune response                                                                                                                                                                                                  |                       |  | 15.88              | 25.62  |
| RAE15C                                                                                                                                                                | antigen processing and presentation                                                                                                                                                                                                                                                         |                       |  | 5.34               | 43.88  |
| POM3                                                                                                                                                                  | hemopoiesis                                                                                                                                                                                                                                                                                 |                       |  | 8.34               | 36.59  |
| DOXK1                                                                                                                                                                 | innate immune response                                                                                                                                                                                                                                                                      |                       |  | 18.88              | 29.88  |
| PSME2                                                                                                                                                                 | T cell receptor signaling pathway, antigen processing and presentation of exogenous peptide antigen via MHC class I, TAP-dependent, stimulatory C-type lectin receptor signaling pathway                                                                                                    |                       |  | 26.16              | 12.91  |
| PCBP2                                                                                                                                                                 | defense response to virus, innate immune response                                                                                                                                                                                                                                           |                       |  | 26.21              | 34.44  |
| PEMC4                                                                                                                                                                 | T cell receptor signaling pathway, antigen processing and presentation of exogenous peptide antigen via MHC class I, TAP-dependent, stimulatory C-type lectin receptor signaling pathway                                                                                                    |                       |  | 15.07              | 25.62  |
| ITGB1                                                                                                                                                                 | antigen processing and presentation of exogenous peptide antigen via MHC class I, TAP-dependent, stimulatory C-type lectin receptor signaling pathway                                                                                                                                       |                       |  | 5.74               | 42.85  |
| APF1B1                                                                                                                                                                | antigen processing and presentation of exogenous peptide antigen via MHC class II                                                                                                                                                                                                           |                       |  | 16.88              | 23.68  |
| PEMA7                                                                                                                                                                 | T cell receptor signaling pathway, antigen processing and presentation of exogenous peptide antigen via MHC class I, TAP-dependent, stimulatory C-type lectin receptor signaling pathway                                                                                                    |                       |  | 14.94              | 19.27  |
| PEMD1                                                                                                                                                                 | T cell receptor signaling pathway, antigen processing and presentation of exogenous peptide antigen via MHC class I, TAP-dependent, stimulatory C-type lectin receptor signaling pathway                                                                                                    |                       |  | 15.07              | 25.62  |
| CAPZ1                                                                                                                                                                 | innate immune response                                                                                                                                                                                                                                                                      |                       |  | 15.88              | 23.68  |
| PSMA8                                                                                                                                                                 | antigen processing and presentation of exogenous peptide antigen via MHC class I, TAP-dependent, stimulatory C-type lectin receptor signaling pathway                                                                                                                                       |                       |  | 11.21              | 23.68  |
| RAE17A                                                                                                                                                                | antigen processing and presentation of exogenous peptide antigen via MHC class II                                                                                                                                                                                                           |                       |  | 21.47              | 32.28  |
| SLC3A2                                                                                                                                                                | leukocyte migration                                                                                                                                                                                                                                                                         |                       |  | 1.97               | 43.05  |
| PRKACA                                                                                                                                                                | stimulatory C-type lectin receptor signaling pathway                                                                                                                                                                                                                                        |                       |  | 8.40               | 19.27  |
| PRKACB                                                                                                                                                                | stimulatory C-type lectin receptor signaling pathway                                                                                                                                                                                                                                        |                       |  | 15.07              | 15.07  |
| PEMB2                                                                                                                                                                 | T cell receptor signaling pathway, antigen processing and presentation of exogenous peptide antigen via MHC class I, TAP-dependent, stimulatory C-type lectin receptor signaling pathway                                                                                                    |                       |  | 15.07              | 15.07  |
| SEC13                                                                                                                                                                 | antigen processing and presentation of exogenous peptide antigen via MHC class II, antigen processing and presentation of peptide antigen via MHC class I                                                                                                                                   |                       |  | 8.54               | 27.88  |
| UREY1                                                                                                                                                                 | T cell receptor signaling pathway, nucleotide-binding oligomerization domain containing signaling pathway, stimulatory C-type lectin receptor signaling pathway                                                                                                                             |                       |  | 6.34               | 23.68  |
| PAF1A                                                                                                                                                                 | T cell activation                                                                                                                                                                                                                                                                           |                       |  | 19.27              | 21.82  |
| ARPC4                                                                                                                                                                 | IFN-gamma receptor signaling pathway involved in phagocytosis                                                                                                                                                                                                                               |                       |  | 19.27              | 17.22  |
| DCN1                                                                                                                                                                  | antigen processing and presentation of exogenous peptide antigen via MHC class II                                                                                                                                                                                                           |                       |  | 9.34               | 23.68  |
| SHMT2                                                                                                                                                                 | response to type I interferon                                                                                                                                                                                                                                                               |                       |  | 21.27              | 21.82  |
| PAK2                                                                                                                                                                  | T cell costimulation, T cell receptor signaling pathway, stimulatory C-type lectin receptor signaling pathway                                                                                                                                                                               |                       |  | 12.14              | 16.78  |
| PEMC3                                                                                                                                                                 | T cell receptor signaling pathway, antigen processing and presentation of exogenous peptide antigen via MHC class I, TAP-dependent, stimulatory C-type lectin receptor signaling pathway                                                                                                    |                       |  | 3.74               | 36.89  |
| SEC14D                                                                                                                                                                | antigen processing and presentation of exogenous peptide antigen via MHC class II, antigen processing and presentation of peptide antigen via MHC class I                                                                                                                                   |                       |  | 4.14               | 23.68  |
| PSMA5                                                                                                                                                                 | T cell receptor signaling pathway, antigen processing and presentation of exogenous peptide antigen via MHC class I, TAP-dependent, stimulatory C-type lectin receptor signaling pathway                                                                                                    |                       |  | 8.93               | 37.88  |
| CD109                                                                                                                                                                 | reticulocytosis                                                                                                                                                                                                                                                                             |                       |  | 19.07              | 12.91  |
| PEMD14                                                                                                                                                                | T cell receptor signaling pathway, antigen processing and presentation of exogenous peptide antigen via MHC class I, TAP-dependent, stimulatory C-type lectin receptor signaling pathway                                                                                                    |                       |  | 12.14              | 16.78  |
| SEC1A1                                                                                                                                                                | response to interferon-gamma                                                                                                                                                                                                                                                                |                       |  | 14.94              | 16.78  |
| ANCY                                                                                                                                                                  | chronic inflammatory response to antigenic stimulus                                                                                                                                                                                                                                         |                       |  | 12.14              | 19.27  |
| PSMB8                                                                                                                                                                 | T cell receptor signaling pathway, antigen processing and presentation of exogenous peptide antigen via MHC class I, TAP-dependent, stimulatory C-type lectin receptor signaling pathway                                                                                                    |                       |  | 6.54               | 27.88  |
| PRCALM                                                                                                                                                                | hemopoiesis                                                                                                                                                                                                                                                                                 |                       |  | 5.88               | 23.68  |
| APF1B1                                                                                                                                                                | antigen processing and presentation of exogenous peptide antigen via MHC class II                                                                                                                                                                                                           |                       |  | 8.40               | 12.91  |
| ARPC2                                                                                                                                                                 | IFN-gamma receptor signaling pathway involved in phagocytosis                                                                                                                                                                                                                               |                       |  | 1.46               | 19.27  |
| PPF1R14B                                                                                                                                                              | innate immune response                                                                                                                                                                                                                                                                      |                       |  | 15.88              | 2.15   |
| PSMA2                                                                                                                                                                 | T cell receptor signaling pathway, antigen processing and presentation of exogenous peptide antigen via MHC class I, TAP-dependent, stimulatory C-type lectin receptor signaling pathway                                                                                                    |                       |  | 14.94              | 8.61   |
| PSMA4                                                                                                                                                                 | T cell receptor signaling pathway, antigen processing and presentation of exogenous peptide antigen via MHC class I, TAP-dependent, stimulatory C-type lectin receptor signaling pathway                                                                                                    |                       |  | 7.47               | 17.22  |
| Exponentially Modified Protein Abundance Index ( <a href="http://www.matrixscience.com/help/empai_help.html">http://www.matrixscience.com/help/empai_help.html</a> ). |                                                                                                                                                                                                                                                                                             |                       |  |                    |        |

| UniProt/Swiss-Prot                                                                                                                                                    |                                                                                                                                                                                                                                                    | Biological Process    |  | empAI <sup>2</sup> |       |
|-----------------------------------------------------------------------------------------------------------------------------------------------------------------------|----------------------------------------------------------------------------------------------------------------------------------------------------------------------------------------------------------------------------------------------------|-----------------------|--|--------------------|-------|
| Accession ID                                                                                                                                                          |                                                                                                                                                                                                                                                    | Immune system process |  | CDM                | DMEM  |
| PEMD12                                                                                                                                                                | T cell receptor signaling pathway, antigen processing and presentation of exogenous peptide antigen via MHC class I, TAP-dependent, stimulatory C-type lectin receptor signaling pathway                                                           |                       |  | 15.07              | 12.91 |
| PEMC2                                                                                                                                                                 | T cell receptor signaling pathway, antigen processing and presentation of exogenous peptide antigen via MHC class I, TAP-dependent, stimulatory C-type lectin receptor signaling pathway                                                           |                       |  | 7.47               | 25.68 |
| CD042                                                                                                                                                                 | IFN-gamma receptor signaling pathway involved in phagocytosis, T cell costimulation, dendritic cell migration, macrophage differentiation                                                                                                          |                       |  | 19.27              | 17.22 |
| DPN4                                                                                                                                                                  | T cell activation, T cell costimulation                                                                                                                                                                                                            |                       |  | 8.93               | 36.89 |
| CAPZ2                                                                                                                                                                 | innate immune response                                                                                                                                                                                                                             |                       |  | 7.47               | 36.13 |
| PAFAH1B1                                                                                                                                                              | reticulocytosis development                                                                                                                                                                                                                        |                       |  | 9.34               | 12.91 |
| IRF7                                                                                                                                                                  | immune response                                                                                                                                                                                                                                    |                       |  | 4.87               | 27.88 |
| PSMC1                                                                                                                                                                 | T cell receptor signaling pathway, antigen processing and presentation of exogenous peptide antigen via MHC class I, TAP-dependent, stimulatory C-type lectin receptor signaling pathway                                                           |                       |  | 7.47               | 17.22 |
| PEMB3                                                                                                                                                                 | T cell receptor signaling pathway, antigen processing and presentation of exogenous peptide antigen via MHC class I, TAP-dependent, stimulatory C-type lectin receptor signaling pathway                                                           |                       |  | 8.40               | 17.22 |
| IRF17                                                                                                                                                                 | erythrocyte homeostasis                                                                                                                                                                                                                            |                       |  | 8.40               | 19.27 |
| URE2N                                                                                                                                                                 | T cell receptor signaling pathway, nucleotide-binding oligomerization domain containing signaling pathway, stimulatory C-type lectin receptor signaling pathway                                                                                    |                       |  | 9.34               | 15.07 |
| BYNCRIP                                                                                                                                                               | cellular response to interferon-gamma                                                                                                                                                                                                              |                       |  | 3.74               | 17.22 |
| IRFDC2                                                                                                                                                                | lymphocyte proliferation                                                                                                                                                                                                                           |                       |  | 7.47               | 19.27 |
| SLC1                                                                                                                                                                  | reticulocytosis differentiation                                                                                                                                                                                                                    |                       |  | 9.34               | 6.41  |
| PEMB8                                                                                                                                                                 | T cell receptor signaling pathway, antigen processing and presentation of exogenous peptide antigen via MHC class I, TAP-dependent, stimulatory C-type lectin receptor signaling pathway                                                           |                       |  | 8.40               | 15.07 |
| PEMD7                                                                                                                                                                 | T cell receptor signaling pathway, antigen processing and presentation of exogenous peptide antigen via MHC class I, TAP-dependent, stimulatory C-type lectin receptor signaling pathway                                                           |                       |  | 4.87               | 19.27 |
| PPF1A                                                                                                                                                                 | T cell activation                                                                                                                                                                                                                                  |                       |  | 1.87               | 17.22 |
| PEMB1                                                                                                                                                                 | T cell receptor signaling pathway, antigen processing and presentation of exogenous peptide antigen via MHC class I, TAP-dependent, stimulatory C-type lectin receptor signaling pathway                                                           |                       |  | 6.54               | 17.22 |
| PEMB7                                                                                                                                                                 | T cell receptor signaling pathway, antigen processing and presentation of exogenous peptide antigen via MHC class I, TAP-dependent, stimulatory C-type lectin receptor signaling pathway                                                           |                       |  | 9.34               | 12.91 |
| PEMC6                                                                                                                                                                 | T cell receptor signaling pathway, antigen processing and presentation of exogenous peptide antigen via MHC class I, TAP-dependent, stimulatory C-type lectin receptor signaling pathway                                                           |                       |  | 7.47               | 16.78 |
| ITGB5                                                                                                                                                                 | antigen processing and presentation of exogenous peptide antigen via MHC class I, TAP-dependent, stimulatory C-type lectin receptor signaling pathway                                                                                              |                       |  | 3.74               | 23.68 |
| OTUB1                                                                                                                                                                 | adaptive immune response                                                                                                                                                                                                                           |                       |  | 6.54               | 12.91 |
| IRF12                                                                                                                                                                 | alpha-beta T cell differentiation                                                                                                                                                                                                                  |                       |  | 8.40               | 12.91 |
| STAT2                                                                                                                                                                 | defense response to virus, type I interferon signaling pathway                                                                                                                                                                                     |                       |  | 7.47               | 6.46  |
| ENPP1                                                                                                                                                                 | immune response                                                                                                                                                                                                                                    |                       |  | 6.54               | 12.91 |
| PRDX3                                                                                                                                                                 | myeloid cell differentiation                                                                                                                                                                                                                       |                       |  | 7.47               | 12.91 |
| PEMC4                                                                                                                                                                 | T cell receptor signaling pathway, antigen processing and presentation of exogenous peptide antigen via MHC class I, TAP-dependent, stimulatory C-type lectin receptor signaling pathway                                                           |                       |  | 4.87               | 15.07 |
| BKPI                                                                                                                                                                  | T cell receptor signaling pathway, stimulatory C-type lectin receptor signaling pathway                                                                                                                                                            |                       |  | 3.74               | 21.82 |
| APF1B1                                                                                                                                                                | antigen processing and presentation, antigen processing and presentation, exogenous lipid antigen via MHC class II                                                                                                                                 |                       |  | 4.87               | 12.91 |
| CTP1                                                                                                                                                                  | B cell proliferation, T cell proliferation                                                                                                                                                                                                         |                       |  | 7.47               | 15.07 |
| RAC1                                                                                                                                                                  | IFN-gamma receptor signaling pathway involved in phagocytosis, T cell costimulation, mast cell chemotaxis                                                                                                                                          |                       |  | 7.47               | 15.07 |
| CTNNB1                                                                                                                                                                | cell differentiation, T cell differentiation in thymus, osteoclast differentiation, thymus development                                                                                                                                             |                       |  | 9.93               | 21.82 |
| PEMD11                                                                                                                                                                | T cell receptor signaling pathway, antigen processing and presentation of exogenous peptide antigen via MHC class I, TAP-dependent, stimulatory C-type lectin receptor signaling pathway                                                           |                       |  | 3.74               | 15.07 |
| PEMD12                                                                                                                                                                | T cell receptor signaling pathway, antigen processing and presentation of exogenous peptide antigen via MHC class I, TAP-dependent, stimulatory C-type lectin receptor signaling pathway                                                           |                       |  | 3.74               | 12.91 |
| TRIM28                                                                                                                                                                | innate immune response                                                                                                                                                                                                                             |                       |  | 6.54               | 16.78 |
| DYLL1                                                                                                                                                                 | antigen processing and presentation of exogenous peptide antigen via MHC class II                                                                                                                                                                  |                       |  | 9.34               | 12.91 |
| TRIM21                                                                                                                                                                | erythrocyte development                                                                                                                                                                                                                            |                       |  | 7.47               | 8.61  |
| STOML2                                                                                                                                                                | CD4-positive, alpha-beta T cell activation, T cell receptor signaling pathway                                                                                                                                                                      |                       |  | 3.74               | 12.91 |
| PEMC5                                                                                                                                                                 | T cell receptor signaling pathway, antigen processing and presentation of exogenous peptide antigen via MHC class I, TAP-dependent, stimulatory C-type lectin receptor signaling pathway                                                           |                       |  | 7.47               | 6.46  |
| DCN2                                                                                                                                                                  | antigen processing and presentation of exogenous peptide antigen via MHC class II                                                                                                                                                                  |                       |  | 1.87               | 21.82 |
| PEME1                                                                                                                                                                 | T cell receptor signaling pathway, antigen processing and presentation of exogenous antigen, antigen processing and presentation of exogenous peptide antigen via MHC class I, TAP-dependent, stimulatory C-type lectin receptor signaling pathway |                       |  | 2.88               | 15.07 |
| TRIOV2                                                                                                                                                                | immune system development                                                                                                                                                                                                                          |                       |  | 6.54               | 8.61  |
| SCD1                                                                                                                                                                  | reticulocytosis homeostasis, thymus development                                                                                                                                                                                                    |                       |  | 4.87               | 15.07 |
| LGALS3                                                                                                                                                                | endothelial chemotaxis, innate immune response, macrophage chemotaxis, monocyte chemotaxis, mononuclear cell migration, neutrophil chemotaxis                                                                                                      |                       |  | 2.88               | 15.07 |
| URE2D2                                                                                                                                                                | T cell receptor signaling pathway, TRF-dependent toll-like receptor signaling pathway, stimulatory C-type lectin receptor signaling pathway                                                                                                        |                       |  | 8.40               | 4.31  |
| ARPC1A                                                                                                                                                                | IFN-gamma receptor signaling pathway involved in phagocytosis                                                                                                                                                                                      |                       |  | 3.74               | 17.22 |
| Exponentially Modified Protein Abundance Index ( <a href="http://www.matrixscience.com/help/empai_help.html">http://www.matrixscience.com/help/empai_help.html</a> ). |                                                                                                                                                                                                                                                    |                       |  |                    |       |

**Table S6. Identification of endogenous proteins (Biological Process: biological regulation) in hADSC; group CDM & DMEM.**

| UniProt/Swiss-Prot<br>Accession ID | Biological Process<br>biological regulation                                                                                                                                                                                                                                                                                            | enrPAP |         |
|------------------------------------|----------------------------------------------------------------------------------------------------------------------------------------------------------------------------------------------------------------------------------------------------------------------------------------------------------------------------------------|--------|---------|
|                                    |                                                                                                                                                                                                                                                                                                                                        | CDM    | DMEM    |
| ACTA2                              | positive regulation of gene expression, regulation of blood pressure, vascular smooth muscle contraction                                                                                                                                                                                                                               | 285.79 | 439.19  |
| POTEE                              | retina homeostasis                                                                                                                                                                                                                                                                                                                     | 245.54 | 200.79  |
| SMO                                | SMAD protein signal transduction, negative regulation of neuron projection development, positive regulation of gene expression, positive regulation of glial cell proliferation, regulation of Schwann cell migration, regulation of axonogenesis                                                                                      | 558.20 | 1109.55 |
| MYH9                               | hemoglobin-mediated signaling pathway, negative regulation of actin filament polymerization, negative regulation of actin filament severing, platelet aggregation, positive regulation of protein processing in phagocytic vesicle, regulation of cell shape, regul                                                                    | 500.79 | 961.83  |
| MYH10                              | regulation of cell shape                                                                                                                                                                                                                                                                                                               | 15.88  | 124.94  |
| FLNA                               | adequate cytoskeleton-binding domain receptor signaling pathway, cytoskeletal sequestering of protein, negative regulation of apoptotic process, negative regulation of protein catabolic process, negative regulation of sequence-specific DNA binding transcri                                                                       | 521.19 | 824.68  |
| HEP99AB1                           | ATP5-mediated unfolded protein response, ERBB2 signaling pathway, Fc-gamma receptor signaling pathway involved in phagocytosis, negative regulation of complement-dependent cytotoxicity, negative regulation of neuron apoptotic process, negative regulation o                                                                       | 439.93 | 452.18  |
| HEP99B1                            | ATP5-mediated unfolded protein response, negative regulation of apoptotic process, regulation of phosphoenolpyruvate carboxykinase activity, sequestering of calcium ion, toll-like receptor signaling pathway                                                                                                                         | 87.79  | 180.81  |
| HEP99AB1                           | ERBB2 signaling pathway, Fc-gamma receptor signaling pathway involved in phagocytosis, positive regulation of cardiac muscle contraction, positive regulation of cell size, positive regulation of lamellipodium assembly, positive regulation of nitric oxide bi                                                                      | 200.79 | 165.74  |
| ALB                                | hemolysis by symbol of host erythrocytes, maintenance of mitochondrion location, negative regulation of apoptotic process, negative regulation of programmed cell death, retina homeostasis                                                                                                                                            | 698.52 | 47.35   |
| EEF1A1                             | calcium-mediated signaling, regulation of chaperone-mediated autophagy, regulation of transcription, DNA-templated                                                                                                                                                                                                                     | 382.88 | 378.68  |
| HEP99B1                            | ATP5-mediated unfolded protein response, ER overfold response, RE1-mediated unfolded protein response, PERK-mediated unfolded protein response, RNA interference, activation of signaling protein activity involved in unfolded protein response, endoplasmic r                                                                        | 503.80 | 589.94  |
| HEP99A                             | maintenance of protein localization in endoplasmic reticulum, positive regulation of cell migration                                                                                                                                                                                                                                    | 132.61 | 247.86  |
| HEP99A1                            | negative regulation of cell death, negative regulation of endoplasmic reticulum stress-induced intrinsic apoptotic signaling pathway, negative regulation of extrinsic apoptotic signaling pathway in absence of ligand, negative regulation of inclusion body a                                                                       | 15.88  | 61.84   |
| HEP99A2                            | negative regulation of inclusion body assembly, positive regulation of calcium-transporting ATPase activity, positive regulation of cycle-dependent protein serine/threonine kinase activity involved in G2M transition of mitotic cell cycle, positive regulatio                                                                      | 19.81  | 38.99   |
| TUBA1B                             | establishment or maintenance of cell polarity regulating cell shape                                                                                                                                                                                                                                                                    | 139.50 | 292.74  |
| YWHAQ                              | negative regulation of ion transmembrane transport, negative regulation of transcription, DNA-templated, positive regulation of protein insertion into mitochondrial membrane involved in apoptotic signaling pathway, small GTPase mediated signal transduction                                                                       | 29.88  | 68.27   |
| YWHAQ                              | negative regulation of protein kinase activity, negative regulation of protein serine/threonine kinase activity, positive regulation of protein insertion into mitochondrial membrane involved in apoptotic signaling pathway, regulation of neuron differentiation, regulation of signal transduction, regulation of synaptic plastic | 38.82  | 47.35   |
| YWHAQ2                             | hepatocellular carcinoma signal transduction, membrane repolarization during cardiac muscle cell action potential, negative regulation of cytoskeleton organization, negative regulation of cytoskeleton organization, negative regulation of cytoskeleton organization                                                                | 42.98  | 51.68   |
| YWHAH                              | glucocorticoid receptor signaling pathway, membrane depolarization during action potential, negative regulation of dendrite morphogenesis, positive regulation of protein insertion into mitochondrial membrane involved in apoptotic signaling pathway, positive                                                                      | 10.27  | 39.13   |
| ENOF                               | negative regulation of cell growth, negative regulation of transcription, DNA-templated                                                                                                                                                                                                                                                | 284.94 | 273.38  |
| ACTN4                              | MAPK cascade, filamentous cytoskeleton, cardiac conduction, cytoskeletal anchoring at plasma membrane, negative regulation of cellular component movement, negative regulation of heart rate, negative regulation of substrate adhesion-dependent cell spreading, peroxisome proliferator acti                                         | 136.41 | 914.44  |
| ACTN1                              | negative regulation of cellular component movement, platelet aggregation, regulation of apoptotic process, regulation of nucleic acid-templated transcription                                                                                                                                                                          | 194.89 | 379.22  |
| TLN1                               | RE1-mediated unfolded protein response, cytoskeletal anchoring at plasma membrane, platelet aggregation                                                                                                                                                                                                                                | 131.67 | 374.82  |
| TLN2                               | cytoskeletal anchoring at plasma membrane                                                                                                                                                                                                                                                                                              | 7.47   | 25.69   |
| CLTC                               | Wnt signaling pathway, planar cell polarity pathway, negative regulation of hyaluronan biosynthetic process, negative regulation of protein localization to plasma membrane, positive regulation of glucose import, regulation of mitotic spindle organization, si                                                                     | 163.42 | 243.23  |
| CLTCL1                             | positive regulation of glucose import, signal transduction                                                                                                                                                                                                                                                                             | 20.59  | 30.13   |
| PNB                                | cell redox homeostasis, positive regulation of viral entry into host cell, regulation of oxidative stress-induced intrinsic apoptotic signaling pathway                                                                                                                                                                                | 138.34 | 238.79  |
| LDNA                               | positive regulation of apoptotic process                                                                                                                                                                                                                                                                                               | 107.38 | 458.48  |
| EEF2                               | positive regulation of cytoplasmic translation, positive regulation of translation                                                                                                                                                                                                                                                     | 162.49 | 189.42  |
| ALDOA                              | mitotic G2 DNA damage checkpoint, muscle cell cellular homeostasis, regulation of cell shape                                                                                                                                                                                                                                           | 116.73 | 272.20  |
| PLEK                               | body fluid secretion, rheumatism, negative regulation of catalytic activity, negative regulation of low-density lipoprotein particle receptor catabolic process, negative regulation of receptor binding, negative regulation of receptor internalization, posi                                                                        | 103.19 | 279.92  |
| ALX3                               | negative regulation of cell migration, negative regulation of epithelial cell proliferation, negative regulation of keratinocyte migration, negative regulation of keratinocyte proliferation, negative regulation of epithelium regeneration                                                                                          | 92.19  | 282.12  |
| LDALB1                             | T cell costimulation, cellular response to glucose stimulus, negative regulation of cell-substrate adhesion, negative regulation of neuron projection development, positive regulation of I-kappaB kinase/NF-kappaB signaling, positive regulation of dendritic cell differentiation, positive regulation of erythrocyte aggrega       | 118.80 | 180.81  |
| PN1                                | cellular response to glucose stimulus, negative regulation of apoptotic process, negative regulation of transforming growth factor-beta secretion, positive regulation of axon extension, positive regulation of cell migration, positive regulation of chemotaxis, positive regulation o                                              | 97.29  | 251.68  |
| COL4A3                             | positive regulation of endopeptidase activity, negative regulation of peptidase activity                                                                                                                                                                                                                                               | 126.07 | 180.81  |
| COL1A1                             | blood coagulation, negative regulation of cell-substrate adhesion, platelet activation, positive regulation of canonical Wnt signaling pathway, positive regulation of cell migration, positive regulation of epithelial to mesenchymal transition, positive regulation of transcription, DNA-templated, regulation of immune respon   | 75.99  | 228.69  |
| SCRNH1                             | negative regulation of endopeptidase activity                                                                                                                                                                                                                                                                                          | 127.94 | 339.28  |
| AKNAK                              | regulation of RNA splicing, regulation of voltage-gated calcium channel activity                                                                                                                                                                                                                                                       | 93.38  | 459.48  |
| IQGAP1                             | Aurp3 complex-mediated actin nucleation, ERK1 and ERK2 cascade, Ras protein signal transduction, activation of MAPK activity, epidermal growth factor receptor signaling pathway, fibroblast growth factor receptor signaling pathway, negative regulation of G                                                                        | 181.79 | 191.57  |
| PASB                               | negative regulation of cellular metabolic process                                                                                                                                                                                                                                                                                      | 130.74 | 36.88   |
| PN1                                | Wnt signaling pathway, planar cell polarity pathway, negative regulation of actin filament polymerization, negative regulation of stress fiber assembly, positive regulation of ATPase activity, positive regulation of DNA metabolic process, positive regulatio                                                                      | 103.66 | 187.13  |
| CALR                               | ATP5-mediated unfolded protein response, cell cycle arrest, cellular calcium ion homeostasis, glucocorticoid receptor signaling pathway, negative regulation of intracellular steroid hormone receptor signaling pathway, negative regulation of neuron differen                                                                       | 118.80 | 128.84  |
| MARCKS                             | regulation of insulin secretion                                                                                                                                                                                                                                                                                                        | 88.72  | 178.85  |
| ATP5B                              | negative regulation of cell adhesion involved in substrate-bound cell migration, regulation of intracellular pH                                                                                                                                                                                                                        | 83.11  | 161.17  |
| PDIA3                              | cell redox homeostasis, positive regulation of extrinsic apoptotic signaling pathway, protein retention in ER lumen, signal transduction                                                                                                                                                                                               | 84.99  | 142.86  |
| THBS1                              | activation of MAPK activity, cell cycle arrest, negative regulation of angiogenesis, negative regulation of antigen processing and presentation of peptide or polysaccharide antigen via MHC class II, negative regulation of blood vessel endothelial cell migration, negative regulation of GMP-mediated signaling, negative         | 82.18  | 148.82  |
| CAP1                               | activation of cytoskeletal cytoskeleton, negative regulation of catalytic activity, signal transduction                                                                                                                                                                                                                                | 127.94 | 124.84  |
| VCP                                | activation of cytoskeleton endopeptidase activity involved in apoptotic process, endoplasmic reticulum unfolded protein response, positive regulation of ATP biosynthetic process, positive regulation of Lys63-specific deubiquitinase activity, positive regulation of mitochondrial membrane potential, positive regulatio          | 88.92  | 132.48  |
| CRL1                               | Rho protein signaling, negative regulation of apoptotic process, positive regulation by host of viral process, regulation of dendritic spine morphogenesis                                                                                                                                                                             | 128.67 | 96.86   |
| GSN                                | actin nucleation, barbed-end actin filament capping, negative regulation of viral entry into host cell, positive regulation of actin nucleation, positive regulation of cytoskeleton organization, negative regulation of sequestering of calcium ion, positive regulation of defense response to virus by                             | 89.88  | 139.81  |
| ANKK4                              | blood coagulation, homeostasis, negative regulation of apoptotic process, negative regulation of catalytic activity, negative regulation of coagulation, negative regulation of sequestering of calcium ion, positive regulation of defense response to virus by                                                                       | 79.87  | 189.28  |
| MSN                                | actin filament anchoring, barbed-end actin filament capping, cytoskeletal anchoring at plasma membrane, negative regulation of ERK1 and ERK2 cascade, negative regulation of GTPase activity, negative regulation of T cell receptor signaling pathway, negative r                                                                     | 86.03  | 99.87   |
| ZDR                                | cytoskeletal anchoring at plasma membrane, negative regulation of ERK1 and ERK2 cascade, negative regulation of T cell receptor signaling pathway, negative regulation of interleukin-2 secretion, negative regulation of p38MAPK cascade, positive regulation o                                                                       | 14.94  | 32.29   |
| SDX                                | actin filament capping, barbed-end actin filament capping, negative regulation of GTPase activity, negative regulation of adherens junction organization, negative regulation of cell size, negative regulation of hemolysis, cell-cell adhesion, positive regulatio                                                                   | 12.14  | 65.43   |
| ICL1                               | negative regulation of cell migration, platelet aggregation                                                                                                                                                                                                                                                                            | 47.83  | 161.43  |
| HEPD1                              | MyD88-dependent toll-like receptor signaling pathway, activation of cytoskeleton endopeptidase activity involved in apoptotic process, negative regulation of apoptotic process, negative regulation of apoptotic process in bone marrow, negative regulation o                                                                        | 79.38  | 81.79   |
| TAGLN2                             | negative regulation of transcription from RNA polymerase II promoter                                                                                                                                                                                                                                                                   | 65.11  | 89.81   |
| ACLY                               | positive regulation of cellular metabolic process                                                                                                                                                                                                                                                                                      | 70.97  | 105.47  |
| SI048                              | positive regulation of fibroblast proliferation, signal transduction                                                                                                                                                                                                                                                                   | 181.79 | 12.91   |
| SEPT1                              | negative regulation of ERK1 and ERK2 cascade, negative regulation of I-kappaB kinase/NF-kappaB signaling, negative regulation of JUN kinase activity, negative regulation of MAPK cascade, negative regulation of acute inflammatory response, negative regulation of apoptotic process, negative regulation of extrinsic              | 58.89  | 124.84  |
| EPF4A1                             | negative regulation of RNA-directed 5'-5' RNA polymerase activity, negative regulation of exosty protein synthesis incorporation, negative regulation of telomerase insertion sequence binding, negative regulation of translation, nuclear-transcribed mRNA catabolic                                                                 | 79.97  | 85.10   |
| EPF4A2                             | negative regulation of RNA-directed 5'-5' RNA polymerase activity, nuclear-transcribed mRNA poly(A) tail shortening, regulation of translational initiation                                                                                                                                                                            | 23.89  | 38.74   |
| TK1                                | regulation of growth                                                                                                                                                                                                                                                                                                                   | 70.94  | 80.99   |
| ASFA                               | activation of phospholipase D activity, cellular copper ion homeostasis, epidermal growth factor receptor signaling pathway, long term synaptic depression, negative regulation of apoptotic process, positive regulation of ER to Golgi vesicle-mediated transp                                                                       | 79.38  | 89.27   |
| ARF1                               | cellular copper ion homeostasis, long term synaptic depression, positive regulation of ER to Golgi vesicle-mediated transport, positive regulation of calcium ion-dependent exocytosis, positive regulation of catalytic activity, positive regulation of dendri                                                                       | 46.89  | 23.83   |
| ARF3                               | small GTPase mediated signal transduction                                                                                                                                                                                                                                                                                              | 40.16  | 17.22   |
| ARF5                               | small GTPase mediated signal transduction                                                                                                                                                                                                                                                                                              | 15.88  | 15.07   |
| CAPN2                              | regulation of cytoskeleton organization                                                                                                                                                                                                                                                                                                | 75.64  | 86.10   |
| LRP1                               | negative regulation of Wnt signaling pathway, negative regulation of neuron apoptotic process, negative regulation of neuron projection development, negative regulation of platelet-derived growth factor receptor-beta signaling pathway, negative regulation                                                                        | 46.89  | 124.84  |
| SI04A11                            | negative regulation of DNA replication, negative regulation of cell proliferation, regulation of cell proliferation, signal transduction                                                                                                                                                                                               | 79.38  | 45.68   |
| PGAM1                              | positive regulation of flagellated sperm motility, regulation of glycolytic process, regulation of pentose-phosphate shunt                                                                                                                                                                                                             | 60.79  | 73.18   |
| PGAM4                              | positive regulation of flagellated sperm motility, regulation of pentose-phosphate shunt                                                                                                                                                                                                                                               | 32.69  | 15.87   |
| HNR1                               | positive regulation of actin filament depolymerization, regulation of oligodendrocyte differentiation, regulation of ventricular cardiac muscle cell membrane repolarization                                                                                                                                                           | 45.76  | 116.39  |
| KPNE1                              | Ran protein signal transduction, modulation by virus of host process                                                                                                                                                                                                                                                                   | 89.77  | 79.84   |
| ANKA1                              | O-protein coupled receptor signaling pathway, coupled to cyclic nucleotide second messenger, cell surface receptor signaling pathway, insulin secretion, negative regulation of T-helper 2 cell differentiation, negative regulation of apoptotic process, negative regulation of catalytic activity, negative regulation of exocy     | 81.38  | 88.25   |
| EPFA                               | polyamine homeostasis, positive regulation of cell proliferation, positive regulation of translational elongation, positive regulation of translational termination                                                                                                                                                                    | 82.18  | 30.13   |
| SEF2A                              | polyamine homeostasis, positive regulation of cell proliferation, positive regulation of translational elongation, positive regulation of translational termination                                                                                                                                                                    | 15.88  | 19.37   |
| COL1A2                             | Rho protein signal transduction, blood coagulation, platelet activation, regulation of blood pressure, regulation of immune response, transforming growth factor beta receptor signaling pathway                                                                                                                                       | 58.82  | 116.39  |
| MYOF                               | regulation of vascular endothelial growth factor receptor signaling pathway                                                                                                                                                                                                                                                            | 37.05  | 111.93  |
| PPB                                | positive regulation by host of viral genome replication, positive regulation of multicellular organism growth, protein stabilization, regulation of post-translational protein modification                                                                                                                                            | 48.49  | 77.48   |
| STAT1                              | JAK-STAT cascade, activation of cytoskeleton endopeptidase activity involved in apoptotic process, interferon-gamma-mediated signaling pathway, negative regulation by virus of viral protein levels in host cell, negative regulation of I-kappaB kinase/NF-kappaB signaling, negative regulation of angiogenesis, negat              | 56.97  | 64.87   |
| ANKA8                              | apoptotic signaling pathway, mitochondrial calcium ion homeostasis, regulation of muscle contraction                                                                                                                                                                                                                                   | 28.82  | 114.88  |
| BAPI1B                             | induction of synaptic plasticity by chemical substance, negative regulation of intracellular transport, negative regulation of microtubule polymerization, positive regulatio                                                                                                                                                          | 20.89  | 139.89  |
| MYP                                | ERBB signaling pathway, negative regulation of protein autophosphorylation, negative regulation of protein tyrosine kinase activity, negative regulation of signaling                                                                                                                                                                  | 46.89  | 95.89   |
| ATPSA1                             | lipid storage, negative regulation of endothelial cell proliferation, regulation of choline O-acetyltransferase activity                                                                                                                                                                                                               | 44.83  | 92.84   |
| MYL3                               | myosin receptor signaling pathway, platelet aggregation, regulation of actin cytoskeleton organization, regulation of cell shape, regulation of muscle contraction, regulation of tube length, open tracheal system                                                                                                                    | 46.76  | 92.88   |
| MYL12B                             | regulation of cell shape                                                                                                                                                                                                                                                                                                               | 37.39  | 73.18   |
| MYL12A                             | myosin receptor signaling pathway, platelet aggregation                                                                                                                                                                                                                                                                                | 31.76  | 73.18   |
| JAR3                               | negative regulation of translational fidelity                                                                                                                                                                                                                                                                                          | 45.76  | 89.28   |
| TDR                                | activation of protein kinase B activity, cell redox homeostasis, negative regulation of hydrogen peroxide-induced cell death, negative regulation of protein export from nucleus, negative regulation of transcription from RNA polymerase II promoter, positive regulation of DNA binding, positive regulation of peptidyl-ase        | 51.38  | 73.84   |
| RNH1                               | mRNA catabolic process, negative regulation of catalytic activity, regulation of angiogenesis                                                                                                                                                                                                                                          | 42.82  | 96.88   |
| HEP9B1                             | intracellular signal transduction, negative regulation of apoptotic process, negative regulation of apoptotic signaling pathway, negative regulation of oxidative stress-induced intrinsic apoptotic signaling pathway, negative regulation of protein serine/threonine kinase activity, platelet aggregation, positive regulatio      | 42.82  | 94.71   |
| CLC1                               | platelet aggregation, positive regulation of osteoblast differentiation, regulation of cell cycle, regulation of ion transmembrane transport, regulation of mitochondrial membrane potential, signal transduction                                                                                                                      | 44.83  | 64.87   |
| DPYSL2                             | positive regulation of glutamate secretion, regulation of axon extension, regulation of neuron differentiation, regulation of neuron projection development, signal transduction                                                                                                                                                       | 42.82  | 129.15  |
| BN01                               | gene silencing by RNA, regulation of transcription, DNA-templated                                                                                                                                                                                                                                                                      | 42.82  | 83.89   |
| FLNB                               | cytoskeletal anchoring at plasma membrane, signal transduction                                                                                                                                                                                                                                                                         | 40.16  | 129.89  |
| PRDX8                              | cell redox homeostasis                                                                                                                                                                                                                                                                                                                 | 48.98  | 64.87   |
| CC2                                | positive regulation of establishment of protein localization to telomere, positive regulation of protein localization to Cajal body, positive regulation of telomerase RNA localization to Cajal body, positive regulation of telomerase activity, positive regulat                                                                    | 34.55  | 89.25   |
| PCN1                               | positive regulation of extracellular matrix disassembly, positive regulation of flagellum assembly, positive regulation of lamellipodium assembly, positive regulation of podosome assembly, regulation of actin cytoskeleton organization, regulation of microv                                                                       | 45.76  | 89.73   |

\*Experimentally Modified Protein Abundance Index ([http://www.matrixscience.com/help/quant\\_amp\\_help.htm](http://www.matrixscience.com/help/quant_amp_help.htm)).

Table S6. Cont 1

\*Exponentially Modified Protein Abundance Index ([http://www.matrixscience.com/help/quant\\_empai\\_help.html](http://www.matrixscience.com/help/quant_empai_help.html)).

Table S8. Cont2

| UniProt/Swiss-Prot<br>Accession ID | Biological Process                                                                                                                                                                                                                                                                                                                                                                                        | log2(PAT) |       |
|------------------------------------|-----------------------------------------------------------------------------------------------------------------------------------------------------------------------------------------------------------------------------------------------------------------------------------------------------------------------------------------------------------------------------------------------------------|-----------|-------|
|                                    |                                                                                                                                                                                                                                                                                                                                                                                                           | CCM       | DMEM  |
| RP12A                              | nuclear-transcribed mRNA catabolic process, nonsense-mediated decay                                                                                                                                                                                                                                                                                                                                       | 24.38     | 26.13 |
| CTSK                               | bone resorption, positive regulation of protein targeting to mitochondrion, regulation of mitophagy, toll-like receptor signaling pathway                                                                                                                                                                                                                                                                 | 26.86     | 12.91 |
| PRMT2                              | Wnt signaling pathway, integrin-mediated signaling pathway, regulation of cell shape, transforming growth factor beta receptor signaling pathway                                                                                                                                                                                                                                                          | 13.07     | 49.91 |
| DLG1                               | negative regulation of protein processing, negative regulation of transforming growth factor beta receptor signaling pathway, regulation of chondrocyte differentiation                                                                                                                                                                                                                                   | 14.91     | 26.89 |
| MYO1C                              | Pc-gamma receptor signaling pathway involved in phagocytosis, positive regulation of actin filament polymerization, positive regulation of cell migration by vascular endothelial growth factor signaling pathway, positive                                                                                                                                                                               | 17.74     | 48.89 |
| NR1E1                              | cellular response to glucose stimulus, negative regulation of cell proliferation, negative regulation of gene expression, negative regulation of myoblast substrate differentiation, positive regulation of DNA binding, positive regulation of epithelial cell proliferation, positive regulation of neuron projection development, negative regulation of transcription from RNA polymerase II promoter | 16.98     | 26.99 |
| PRDX3                              | cell redox homeostasis, negative regulation of apoptotic process, negative regulation of cytosolic-type endopeptidase activity involved in apoptotic process, negative regulation of endonuclease activity, negative regulation of transcription from RNA polymerase II promoter, positive regulation of collagen biosynthesis                                                                            | 14.91     | 49.91 |
| RAP1B                              | Rap protein signal transduction, activation of MAPKK activity, cellular response to glucose stimulus, negative regulation of calcium ion-dependent exocytosis, negative regulation of collagen biosynthetic process, negative regulation of synaptic vesicle exocytosis, nerve                                                                                                                            | 22.41     | 32.29 |
| RAP1A                              | Rap protein signal transduction, activation of MAPKK activity, cellular response to glucose stimulus, negative regulation of collagen biosynthetic process, negative regulation of synaptic vesicle exocytosis, nerve growth factor signaling pathway, positive regulation of ERK1                                                                                                                        | 16.91     | 25.91 |
| IPF1EN1                            | MAPK cascade, SMAD protein import into nucleus, actin filament capping, common-partner SMAD protein phosphorylation, positive regulation of GTPase activity, positive regulation of interleukin-2 secretion, positive regulation of protein localization to plasma                                                                                                                                        | 14.94     | 39.74 |
| RNMPF                              | negative regulation of blood pressure                                                                                                                                                                                                                                                                                                                                                                     | 26.86     | 21.52 |
| APHCAP1                            | the protein signal transduction, positive regulation of GTPase activity, positive regulation of signal transduction, regulation of small GTPase mediated signal transduction, small GTPase mediated signal transduction                                                                                                                                                                                   | 14.94     | 39.74 |
| BPARC                              | negative regulation of angiogenesis, negative regulation of endothelial cell proliferation, positive regulation of endothelial cell migration, regulation of cell morphogenesis, regulation of cell proliferation, signal transduction                                                                                                                                                                    | 14.94     | 43.05 |
| ATP1A1                             | cell communication by electrical coupling involved in cardiac conduction, cellular potassium ion homeostasis, cellular sodium ion homeostasis, membrane hyperpolarization, membrane repolarization during cardiac muscle cell action potential, negative regulation of transcription from RNA polymerase II promoter                                                                                      | 28.21     | 17.22 |
| APH2D2A                            | negative regulation of apoptotic process, negative regulation of angiogenesis, negative regulation of cell adhesion, positive regulation of GTPase activity, positive regulation of angiogenesis, regulation of Rho protein signal transduction, regulation of a                                                                                                                                          | 16.91     | 39.74 |
| NAP1L1                             | positive regulation of cell proliferation                                                                                                                                                                                                                                                                                                                                                                 | 16.91     | 32.29 |
| PTPRB                              | fibroblast growth factor receptor signaling pathway, negative regulation of mRNA splicing, via spliceosome, negative regulation of muscle cell differentiation, regulation of alternative mRNA splicing, via spliceosome                                                                                                                                                                                  | 13.07     | 49.91 |
| CCT3                               | positive regulation of protein localization to CagLI body, positive regulation of telomerase RNA localization to CagLI body, positive regulation of telomerase maintenance via telomerase, protein stabilization                                                                                                                                                                                          | 16.91     | 39.74 |
| ATP4VB2                            | insulin receptor signaling pathway, phagosome acidification, regulation of macroautophagy                                                                                                                                                                                                                                                                                                                 | 11.21     | 49.91 |
| VCAC2                              | negative regulation of intrinsic apoptotic signaling pathway, negative regulation of protein polymerization, regulation of antitumor transmembrane transport, regulation of neuron transport                                                                                                                                                                                                              | 6.54      | 58.12 |
| PCBP1                              | positive regulation of transcription from RNA polymerase II promoter                                                                                                                                                                                                                                                                                                                                      | 26.86     | 49.91 |
| RP33A                              | negative regulation of apoptotic process, nuclear-transcribed mRNA catabolic process, nonsense-mediated decay                                                                                                                                                                                                                                                                                             | 6.54      | 43.05 |
| TNMD1                              | cell redox homeostasis, signal transduction                                                                                                                                                                                                                                                                                                                                                               | 2.89      | 68.73 |
| ACM5                               | positive regulation of blood pressure                                                                                                                                                                                                                                                                                                                                                                     | 17.74     | 32.29 |
| COMT                               | catecholamine metabolic process, negative regulation of dopamine metabolic process, negative regulation of renal sodium excretion, negative regulation of smooth muscle cell proliferation, neurotransmitter catabolic process, positive regulation of homocysteine metabolic process, regulation of sensory perception of pain                                                                           | 14.91     | 34.44 |
| NME2                               | cellular response to glucose stimulus, integrin-mediated signaling pathway, negative regulation of apoptotic process, negative regulation of apoptotic process, negative regulation of cAMP biosynthetic process, positive regulation of epithelial cell proliferation, positive regulation of keratinocyte differentiation                                                                               | 48.76     | 26.89 |
| PLD3                               | translocation                                                                                                                                                                                                                                                                                                                                                                                             | 13.07     | 47.95 |
| PSMA4                              | Pc-epithelial receptor signaling pathway, MAPK cascade, NIK/NF-kappaB signaling, T cell receptor signaling pathway, Wnt signaling pathway, planar cell polarity pathway, negative regulation of canonical Wnt signaling pathway, negative regulation of ubiquitin-protein ligase activity involved in mitotic cell cycle, positive                                                                        | 15.88     | 39.74 |
| SEIPINB8                           | negative regulation of endoplasmic reticulum stress                                                                                                                                                                                                                                                                                                                                                       | 6.54      | 55.96 |
| IL13RA4                            | active induction of host immune response by virus, negative regulation of mitochondrial outer membrane permeabilization involved in apoptotic signaling pathway, positive regulation of cell proliferation, regulation of insulin secretion                                                                                                                                                               | 14.94     | 26.89 |
| BLC5A4                             | negative regulation of mitochondrial outer membrane permeabilization involved in apoptotic signaling pathway, positive regulation of cell proliferation, regulation of insulin secretion                                                                                                                                                                                                                  | 8.34      | 15.07 |
| ARPC18                             | Arp2/3 complex mediated actin nucleation, Pc-gamma receptor signaling pathway involved in phagocytosis, epidermal receptor signaling pathway, regulation of actin filament polymerization                                                                                                                                                                                                                 | 15.88     | 39.74 |
| CSBP                               | blood coagulation, intrinsic pathway, cellular response to hypoxia, negative regulation of BDNF signaling pathway, negative regulation of FOS signaling pathway, negative regulation of defense response to virus, negative regulation of interferon-gamma production, negative regulation of interleukin-12                                                                                              | 16.91     | 25.91 |
| CSBP1                              | protein aggregation                                                                                                                                                                                                                                                                                                                                                                                       | 6.88      | 47.95 |
| DPY11                              | MEI-mediated ubiquitin-protein complex, circadian regulation of gene expression                                                                                                                                                                                                                                                                                                                           | 15.88     | 47.95 |
| SPR41                              | nuclear-transcribed mRNA catabolic process, nonsense-mediated decay, nuclear-transcribed mRNA poly(A) tail shortening, positive regulation of neuron differentiation, regulation of mRNA stability, regulation of translation, regulation of translational initiation                                                                                                                                     | 21.48     | 17.22 |
| RAB3C                              | blood coagulation, positive regulation of exocytosis, receptor internalization involved in canonical Wnt signaling pathway, regulation of autophagosome assembly, regulation of endocytosis, regulation of endosome size, regulation of filopodium assembly, regulation of transcription from RNA polymerase II promoter                                                                                  | 9.34      | 43.05 |
| C22B1                              | positive regulation of integrin-mediated signaling pathway, positive regulation of receptor internalization, regulation of potassium ion transport, regulation of vascular endothelial growth factor signaling pathway                                                                                                                                                                                    | 26.86     | 12.91 |
| ATP2A2                             | ER-chaperone signaling pathway, cellular calcium ion homeostasis, negative regulation of heart contraction, negative regulation of endoplasmic reticulum calcium ion concentration, positive regulation of fast                                                                                                                                                                                           | 7.47      | 43.05 |
| COR10C                             | activation of GTPase activity, negative regulation of epithelial cell migration, negative regulation of focal adhesion assembly, negative regulation of protein kinase activity by regulation of protein phosphorylation, negative regulation of substrate adhesion-dependent cell spreading, positive regulation of lamellipodium                                                                        | 14.94     | 25.91 |
| NR1E3X                             | Wnt signaling pathway, extrinsic apoptotic signaling pathway via death domain receptors, intracellular signal transduction, intrinsic apoptotic signaling pathway, negative regulation of apoptotic process, negative regulation of cell growth, negative regulation of cytosolic-type endopeptidase activity involved in apoptotic                                                                       | 16.91     | 25.91 |
| DBN1                               | maintenance of protein location in cell, regulation of dendrite development, regulation of neuronal synaptic plasticity                                                                                                                                                                                                                                                                                   | 12.14     | 39.74 |
| PAPB2                              | blood coagulation                                                                                                                                                                                                                                                                                                                                                                                         | 14.91     | 32.29 |
| PAS1                               | mitogen receptor signaling pathway, gene silencing by RNA, positive regulation of protein binding, positive regulation of transcription, DNA-templated, pre-miRNA export from nucleus, signal transduction, small GTPase mediated signal transduction                                                                                                                                                     | 16.98     | 26.89 |
| RP14                               | nuclear-transcribed mRNA catabolic process, nonsense-mediated decay                                                                                                                                                                                                                                                                                                                                       | 9.34      | 39.74 |
| TNBS4X                             | sequestration of actin monomers                                                                                                                                                                                                                                                                                                                                                                           | 17.74     | 17.22 |
| TRIP10                             | positive regulation of kappaB transcription/NF-kappaB signaling, regulation of cell death, regulation of transcription, DNA-templated, signal transduction                                                                                                                                                                                                                                                | 16.91     | 34.44 |
| PI1                                | homeostasis of number of cells within a tissue                                                                                                                                                                                                                                                                                                                                                            | 14.91     | 32.29 |
| LAMC1                              | positive regulation of epithelial cell proliferation                                                                                                                                                                                                                                                                                                                                                      | 16.91     | 43.05 |
| NCL                                | positive regulation of transcription from RNA polymerase II promoter, positive regulation of transcription of nuclear large RNA transcript from RNA polymerase II promoter                                                                                                                                                                                                                                | 16.91     | 43.05 |
| RP13                               | nuclear-transcribed mRNA catabolic process, nonsense-mediated decay                                                                                                                                                                                                                                                                                                                                       | 9.34      | 39.74 |
| RP2                                | nuclear-transcribed mRNA catabolic process, nonsense-mediated decay, positive regulation of transference activity                                                                                                                                                                                                                                                                                         | 15.88     | 23.88 |
| TPN2                               | regulation of ATPase activity                                                                                                                                                                                                                                                                                                                                                                             | 16.91     | 43.05 |
| COL3A1                             | integrin-mediated signaling pathway, negative regulation of immune response, negative regulation of neuron migration, platelet activation, positive regulation of Rho protein signal transduction, regulation of immune response, transforming growth factor beta receptor signaling pathway                                                                                                              | 17.74     | 17.22 |
| PRKCSH                             | intracellular signal transduction                                                                                                                                                                                                                                                                                                                                                                         | 14.91     | 39.74 |
| MR2                                | signal transduction                                                                                                                                                                                                                                                                                                                                                                                       | 6.48      | 49.91 |
| PSME2                              | Pc-epithelial receptor signaling pathway, MAPK cascade, NIK/NF-kappaB signaling, T cell receptor signaling pathway, Wnt signaling pathway, planar cell polarity pathway, negative regulation of canonical Wnt signaling pathway, negative regulation of ubiquitin-protein ligase activity involved in mitotic cell cycle, positive                                                                        | 26.86     | 12.91 |
| RP5                                | nuclear-transcribed mRNA catabolic process, nonsense-mediated decay, regulation of translational fidelity                                                                                                                                                                                                                                                                                                 | 16.91     | 23.88 |
| SCCBP                              | Rap protein signal transduction, epidermal receptor signaling pathway, negative regulation of proteasomal ubiquitin-dependent protein catabolic process, negative regulation of receptor internalization, positive regulation of JNK cascade, positive regulation of                                                                                                                                      | 14.94     | 26.89 |
| YERK1                              | CRD-mediated mRNA stabilization, negative regulation of striated muscle cell differentiation, negative regulation of transcription from RNA polymerase II promoter, positive regulation of cell division, positive regulation of transcription from RNA polymerase                                                                                                                                        | 17.74     | 25.91 |
| LAMR1                              | positive regulation of cell migration, positive regulation of epithelial cell proliferation                                                                                                                                                                                                                                                                                                               | 25.21     | 4.31  |
| AKR1B1                             | CT-sterol hormone biosynthetic process, positive regulation of JAK-STAT cascade, positive regulation of smooth muscle cell proliferation, stress-activated protein kinase signaling cascade, tissue homeostasis                                                                                                                                                                                           | 16.91     | 25.91 |
| DPYB13                             | negative regulation of cell migration, negative regulation of neuron projection development, positive regulation of filopodium assembly, positive regulation of neuron projection development                                                                                                                                                                                                             | 26.86     | 84.57 |
| IL5                                | regulation of respiratory gas exchange by neuroendocrine system process                                                                                                                                                                                                                                                                                                                                   | 6.54      | 39.74 |
| CSBP2                              | negative regulation of defense response to virus, negative regulation of type I interferon production                                                                                                                                                                                                                                                                                                     | 25.21     | 14.44 |
| RP5B                               | nuclear-transcribed mRNA catabolic process, nonsense-mediated decay                                                                                                                                                                                                                                                                                                                                       | 7.47      | 34.44 |
| PSBC4                              | Pc-epithelial receptor signaling pathway, MAPK cascade, NIK/NF-kappaB signaling, T cell receptor signaling pathway, Wnt signaling pathway, planar cell polarity pathway, negative regulation of canonical Wnt signaling pathway, negative regulation of ubiquitin-protein ligase activity involved in mitotic cell cycle, positive                                                                        | 13.07     | 23.88 |
| RP113                              | nuclear-transcribed mRNA catabolic process, nonsense-mediated decay                                                                                                                                                                                                                                                                                                                                       | 16.91     | 19.37 |
| RP5AX                              | nuclear-transcribed mRNA catabolic process, nonsense-mediated decay, positive regulation of cell proliferation, positive regulation of translation                                                                                                                                                                                                                                                        | 13.07     | 27.88 |
| DP1                                | negative regulation of transcription from RNA polymerase II promoter, regulation of extracellular degradation, regulation of mRNA stability, regulation of protein catabolic process, regulation of protein export from nucleus                                                                                                                                                                           | 16.91     | 15.07 |
| TGAP1                              | ERK1 and ERK2 cascade, endoplasmic A-mediated signaling pathway, entry of synaptobion into host cell by promotion of host phagocytosis, extrinsic apoptotic signaling pathway in absence of ligand, integrin-mediated signaling pathway, negative regulation of                                                                                                                                           | 5.74      | 49.91 |
| EPF2                               | negative regulation of translational initiation, nuclear-transcribed mRNA catabolic process, nonsense-mediated decay                                                                                                                                                                                                                                                                                      | 21.48     | 19.74 |
| AP1B1                              | regulation of defense response to virus by virus                                                                                                                                                                                                                                                                                                                                                          | 16.91     | 19.37 |
| BZWI                               | regulation of transcription, DNA-templated                                                                                                                                                                                                                                                                                                                                                                | 16.91     | 19.37 |
| EMO2                               | blood coagulation, positive regulation of embryonic recycling, positive regulation of myoblast fusion                                                                                                                                                                                                                                                                                                     | 9.34      | 39.74 |
| DPY23                              | activation of MAPK activity, negative regulation of gene expression, negative regulation of protein secretion, positive regulation of gene expression, regulation of endoplasmic reticulum stress-induced intrinsic apoptotic signaling pathway                                                                                                                                                           | 11.21     | 26.89 |
| EPF1                               | ERK-mediated unfolded protein response, negative regulation of guanylate cyclase exchange factor activity, negative regulation of translational initiation in response to stress, positive regulation of defense response to virus by host, positive regulation                                                                                                                                           | 16.91     | 34.44 |
| SPB4                               | regulation of translational initiation                                                                                                                                                                                                                                                                                                                                                                    | 14.94     | 21.52 |
| MAKRE1                             | negative regulation of microtubule binding, negative regulation of microtubule polymerization, positive regulation of cell migration, positive regulation of microtubule plus-end binding                                                                                                                                                                                                                 | 26.86     | 12.91 |
| PAPPC4                             | gene silencing by RNA, mRNA stabilization, negative regulation of nuclear-transcribed mRNA catabolic process, nonsense-mediated decay, negative regulation of nuclear-transcribed mRNA poly(A) tail shortening, nuclear-transcribed mRNA catab                                                                                                                                                            | 17.74     | 25.91 |
| PAPPC1                             | gene silencing by RNA, mRNA stabilization, negative regulation of nuclear-transcribed mRNA catabolic process, nonsense-mediated decay, nuclear-transcribed mRNA poly(A) tail shortening, positive                                                                                                                                                                                                         | 17.74     | 23.88 |
| PRB47                              | Pc-epithelial receptor signaling pathway, MAPK cascade, NIK/NF-kappaB signaling, T cell receptor signaling pathway, Wnt signaling pathway, planar cell polarity pathway, negative regulation of canonical Wnt signaling pathway, negative regulation of ubiquitin-protein ligase activity involved in mitotic cell cycle, positive                                                                        | 14.94     | 19.37 |
| RP13                               | nuclear-transcribed mRNA catabolic process, nonsense-mediated decay                                                                                                                                                                                                                                                                                                                                       | 14.94     | 27.88 |
| YAK5                               | signal transduction                                                                                                                                                                                                                                                                                                                                                                                       | 16.91     | 32.29 |
| MDY1B4                             | mitogen metabolic process, estrogen metabolic process                                                                                                                                                                                                                                                                                                                                                     | 6.54      | 27.88 |
| ERD1A                              | cell redox homeostasis, endoplasmic reticulum unfolded protein response, intrinsic apoptotic signaling pathway in response to endoplasmic reticulum stress, release of sequestered calcium ion into cytosol                                                                                                                                                                                               | 17.74     | 12.91 |
| KPNA4                              | positive regulation of transcription from RNA polymerase II promoter                                                                                                                                                                                                                                                                                                                                      | 14.91     | 23.88 |
| PRD13                              | Pc-epithelial receptor signaling pathway, MAPK cascade, NIK/NF-kappaB signaling, T cell receptor signaling pathway, Wnt signaling pathway, planar cell polarity pathway, negative regulation of canonical Wnt signaling pathway, negative regulation of ubiquitin-protein ligase activity involved in mitotic cell cycle, positive                                                                        | 6.48      | 49.91 |
| RSU1                               | positive regulation of GTPase activity, positive regulation of cell-substrate adhesion, signal transduction                                                                                                                                                                                                                                                                                               | 13.07     | 23.88 |
| TMD10                              | regulation of beta-amyloid formation                                                                                                                                                                                                                                                                                                                                                                      | 12.14     | 21.52 |
| MTN1                               | negative regulation of integrin-mediated signaling pathway, positive regulation of cardiac muscle hypertrophy, positive regulation of macroautophagy, negative regulation of macromolecule biosynthetic process, positive regulation of protein metabolic process, regulation of barbed-end actin filament capping, regulation of                                                                         | 16.91     | 39.74 |
| PCSTN                              | negative regulation of cell-substrate adhesion, negative regulation of substrate adhesion-dependent cell spreading, positive regulation of chemokine (C-C motif) ligand 2 secretion, positive regulation of smooth muscle cell migration, regulation of Notch signaling pathway, regulation of systemic arterial blood pressure                                                                           | 14.91     | 25.91 |
| RAD23B                             | regulation of proteasomal ubiquitin-dependent protein catabolic process                                                                                                                                                                                                                                                                                                                                   | 12.14     | 23.88 |
| TNPO1                              | regulation of mRNA stability                                                                                                                                                                                                                                                                                                                                                                              | 26.86     | 8.61  |
| UREL3                              | positive regulation of protein targeting to mitochondrion, positive regulation of protein ubiquitination, positive regulation of ubiquitin-protein transference activity, regulation of transcription, DNA-templated                                                                                                                                                                                      | 15.88     | 17.22 |
| CARF2A                             | barbed-end actin filament capping, blood coagulation                                                                                                                                                                                                                                                                                                                                                      | 15.88     | 23.88 |
| SP1                                | regulation of translational initiation                                                                                                                                                                                                                                                                                                                                                                    | 6.54      | 39.74 |
| BLOC                               | positive regulation of transcription elongation from RNA polymerase II promoter, regulation of transcription from RNA polymerase II promoter in response to hypoxia                                                                                                                                                                                                                                       | 9.34      | 25.91 |
| KPFB                               | positive regulation of establishment of protein localization to plasma membrane, positive regulation of insulin secretion involved in cellular response to glucose stimulus, positive regulation of intracellular protein transport, positive regulation of poka                                                                                                                                          | 6.54      | 32.29 |
| PSMA4                              | Pc-epithelial receptor signaling pathway, MAPK cascade, NIK/NF-kappaB signaling, T cell receptor signaling pathway, Wnt signaling pathway, planar cell polarity pathway, negative regulation of canonical Wnt signaling pathway, negative regulation of ubiquitin-protein ligase activity involved in mitotic cell cycle, positive                                                                        | 11.21     | 23.88 |

\*Experimentally Modified Protein Abundance Index ([http://www.matrixscience.com/help/quant\\_ammal\\_help.htm](http://www.matrixscience.com/help/quant_ammal_help.htm)).

Table S6. Cont 3.

<sup>a</sup>Exponentially Modified Protein Abundance Index ([http://www.matrixscience.com/help/quant\\_empai\\_help.html](http://www.matrixscience.com/help/quant_empai_help.html)).

Table S8, Cont'd

| UniProt/Swiss-Prot<br>Accession ID | Biological Process<br>Molecular regulation                                                                                                                                                                                                                                                                                                                                                                                         | enrPAP |        |
|------------------------------------|------------------------------------------------------------------------------------------------------------------------------------------------------------------------------------------------------------------------------------------------------------------------------------------------------------------------------------------------------------------------------------------------------------------------------------|--------|--------|
|                                    |                                                                                                                                                                                                                                                                                                                                                                                                                                    | CCM    | OMIM   |
| MAPK12                             | G-protein coupled receptor signaling pathway, positive regulation of cAMP biosynthetic process, positive regulation of protein kinase A signaling, regulation of protein kinase C signaling, signal transduction                                                                                                                                                                                                                   | 7,427  | 12,911 |
| EPF3                               | regulation of translational initiation                                                                                                                                                                                                                                                                                                                                                                                             | 10,227 | 12,911 |
| PKL2                               | androgen receptor signaling pathway, negative regulation of apoptotic process, negative regulation of transcription from RNA polymerase II promoter, negative regulation of transcription, DNA-templated, positive regulation of transcription, DNA-templated, regulation of transcription from RNA polymerase II promoter                                                                                                         | 3,174  | 23,688 |
| SLA                                | negative regulation of MAP kinase activity, negative regulation of inflammatory response, negative regulation of interleukin-6 production, negative regulation of neuron death, negative regulation of protein homodimerization, positive regulation of muscle cell redox homeostasis, negative regulation of cardiac muscle hypertrophy, regulation of the force of heart contraction                                             | 7,427  | 12,911 |
| GLRX3                              | cardio redox homeostasis, negative regulation of cardiac muscle hypertrophy, regulation of the force of heart contraction                                                                                                                                                                                                                                                                                                          | 10,227 | 12,911 |
| SLC10P                             | CRD-mediated mRNA stabilization, negative regulation of translation, regulation of translation                                                                                                                                                                                                                                                                                                                                     | 3,174  | 23,688 |
| SLC                                | cell cycle arrest, integrin-mediated signaling pathway, negative regulation of apoptotic process, negative regulation of cardiac muscle cell apoptotic process, negative regulation of neural precursor cell proliferation, negative regulation of neuron apoptotic process, negative regulation of protein kinase activity, negative regulation of apoptotic process, regulation of transcription from RNA polymerase II promoter | 9,334  | 12,911 |
| PCNA                               | DNA damage response, signal transduction by p53 class mediator resulting in cell cycle arrest, mitotic telomere maintenance via semi-conservative replication, positive regulation of DNA repair, positive regulation of DNA replication, positive regulation of deoxyribonucleic acid, neg                                                                                                                                        | 9,334  | 12,911 |
| POMK2                              | Fc-epsilon receptor signaling pathway, MAPK cascade, NIK/NF-kappaB signaling, T cell receptor signaling pathway, Wnt signaling pathway, planar cell polarity pathway, negative regulation of canonical Wnt signaling pathway, negative regulation of ubiquitin-protein ligase activity involved in mitotic cell cycle, positive                                                                                                    | 7,427  | 12,911 |
| POMK7                              | Fc-epsilon receptor signaling pathway, MAPK cascade, NIK/NF-kappaB signaling, T cell receptor signaling pathway, Wnt signaling pathway, planar cell polarity pathway, negative regulation of canonical Wnt signaling pathway, negative regulation of ubiquitin-protein ligase activity involved in mitotic cell cycle, positive                                                                                                    | 4,837  | 12,911 |
| RP118                              | nuclear-transcribed mRNA catabolic process, nonsense-mediated decay                                                                                                                                                                                                                                                                                                                                                                | 1,871  | 23,688 |
| SLR4A                              | positive regulation of organelle organization                                                                                                                                                                                                                                                                                                                                                                                      | 5,259  | 23,688 |
| TFG                                | positive regulation of I-kappaB kinase/NF-kappaB signaling, signal transduction                                                                                                                                                                                                                                                                                                                                                    | 3,174  | 23,688 |
| TSPO                               | maintenance of protein location in mitochondrion, negative regulation of ATP metabolic process, negative regulation of glial cell proliferation, negative regulation of mitochondrion organization, negative regulation of mitophagy, negative regulation of rnr                                                                                                                                                                   | 8,334  | 12,911 |
| SCSPN1                             | fibrolysis, negative regulation of cell adhesion mediated by integrin, negative regulation of extrinsic apoptotic signaling pathway via death domain receptors, negative regulation of extrinsic apoptotic signaling pathway via death domain                                                                                                                                                                                      | 4,837  | 12,911 |
| RP113                              | nuclear-transcribed mRNA catabolic process, nonsense-mediated decay                                                                                                                                                                                                                                                                                                                                                                | 6,407  | 12,911 |
| PLN1                               | blood coagulation, fibrin clot formation, integrin-mediated signaling pathway, negative regulation of ERK1 and ERK2 cascade, negative regulation of cell adhesion, negative regulation of cell motility, negative regulation of protein phosphorylation, negative regulation of stem cell proliferation, negative regulation of sub                                                                                                | 4,837  | 12,911 |
| PP2CA                              | Fc-epsilon receptor signaling pathway, Wnt signaling pathway, calcium modulating pathway, calcitonin-RFAP1 signaling cascade, calcium-mediated signaling, cellular response to glucose stimulus, excitatory postsynaptic potential, modulation of synaptic transmission, negative regulation of chromatin binding, nega                                                                                                            | 9,334  | 12,911 |
| CTPAP                              | negative regulation of post-translational protein modification, protein stabilization                                                                                                                                                                                                                                                                                                                                              | 6,407  | 12,911 |
| CTNND1                             | Wnt signaling pathway, positive regulation of canonical Wnt signaling pathway, regulation of transcription, DNA-templated                                                                                                                                                                                                                                                                                                          | 4,837  | 12,911 |
| DNAJB1                             | RET-mediated unfolded protein response, positive regulation of ATPase activity                                                                                                                                                                                                                                                                                                                                                     | 6,407  | 12,911 |
| MLN1                               | positive regulation of GTPase activity, positive regulation of intrinsic apoptotic signaling pathway, positive regulation of mitochondrial fusion, positive regulation of protein secretion, positive regulation of r                                                                                                                                                                                                              | 5,880  | 12,911 |
| DT01                               | regulation of translational fidelity                                                                                                                                                                                                                                                                                                                                                                                               | 6,407  | 12,911 |
| IPM8B                              | negative regulation of G1/S transition of mitotic cell cycle, negative regulation of T cell proliferation, negative regulation of cell proliferation, negative regulation of cytokine production, negative regulation of neuron death, negative regulation of tumor necrosis factor production, positive regulation of ERK1 and ERK2 c                                                                                             | 12,134 | 12,911 |
| PEA18                              | DNA damage checkpoint, MAPK cascade, activation of MAPK activity, negative regulation of extrinsic apoptotic signaling pathway via death domain receptors, negative regulation of glucose input, positive regulation of extrinsic apoptotic signaling pathway via death domain                                                                                                                                                     | 8,334  | 12,911 |
| PRKX2                              | cell redox homeostasis, negative regulation of apoptotic process                                                                                                                                                                                                                                                                                                                                                                   | 11,211 | 12,911 |
| PIMB1                              | Fc-epsilon receptor signaling pathway, MAPK cascade, NIK/NF-kappaB signaling, T cell receptor signaling pathway, Wnt signaling pathway, planar cell polarity pathway, negative regulation of canonical Wnt signaling pathway, negative regulation of ubiquitin-protein ligase activity involved in mitotic cell cycle, positive                                                                                                    | 6,407  | 12,911 |
| RTN4                               | negative regulation of axon extension, negative regulation of cell growth, regulation of apoptotic process, regulation of branching morphogenesis of a nerve, regulation of cell migration, regulation of nervous system development                                                                                                                                                                                               | 10,227 | 12,911 |
| SCND1                              | negative regulation of autophagosome assembly, regulation of ER to Golgi vesicle-mediated transport, regulation of protein transport                                                                                                                                                                                                                                                                                               | 6,407  | 12,911 |
| TGOD17                             | tumor necrosis factor-mediated signaling pathway                                                                                                                                                                                                                                                                                                                                                                                   | 8,334  | 12,911 |
| USP9                               | positive regulation of proteasomal ubiquitin-dependent protein catabolic process                                                                                                                                                                                                                                                                                                                                                   | 11,211 | 12,911 |
| RP15A                              | nuclear-transcribed mRNA catabolic process, nonsense-mediated decay, positive regulation of cell cycle, positive regulation of cell proliferation                                                                                                                                                                                                                                                                                  | 6,407  | 12,911 |
| MC1B1                              | positive regulation of cell proliferation, regulation of growth, regulation of transcription, DNA-templated                                                                                                                                                                                                                                                                                                                        | 9,334  | 12,911 |
| PRKBT                              | Fc-epsilon receptor signaling pathway, MAPK cascade, NIK/NF-kappaB signaling, T cell receptor signaling pathway, Wnt signaling pathway, planar cell polarity pathway, negative regulation of canonical Wnt signaling pathway, negative regulation of ubiquitin-protein ligase activity involved in mitotic cell cycle, positive                                                                                                    | 7,427  | 12,911 |
| PMK2C                              | Fc-epsilon receptor signaling pathway, MAPK cascade, NIK/NF-kappaB signaling, T cell receptor signaling pathway, Wnt signaling pathway, planar cell polarity pathway, negative regulation of canonical Wnt signaling pathway, negative regulation of ubiquitin-protein ligase activity involved in mitotic cell cycle, positive                                                                                                    | 7,427  | 12,911 |
| RAE2A                              | positive regulation of acetylcholine, small GTPase mediated signal transduction                                                                                                                                                                                                                                                                                                                                                    | 3,174  | 12,911 |
| TG2B                               | integrin-mediated signaling pathway, transforming growth factor beta receptor signaling pathway                                                                                                                                                                                                                                                                                                                                    | 3,174  | 12,911 |
| EPF6                               | gene silencing by RNA, miRNA mediated inhibition of translation, positive regulation of translation, regulation of fatty acid biosynthetic process, regulation of glycolytic process, regulation of megakaryocyte differentiation, regulation of reactive oxygen species metabolic process                                                                                                                                         | 7,427  | 12,911 |
| PRF152A                            | positive regulation of ERK1 and ERK2 cascade, regulation of translational initiation                                                                                                                                                                                                                                                                                                                                               | 2,880  | 12,911 |
| HL3GL1                             | positive regulation of catalytic activity, positive regulation of myosin-light-chain-phosphatase activity, positive regulation of transcription from RNA polymerase II promoter, regulation of cell adhesion, regulation of establishment of endothelial barrier, regulation of myosin-light-chain-phosphatase activity, regulation                                                                                                | 11,211 | 12,911 |
| AMP2                               | negative regulation of cell proliferation, positive regulation of neuron death, positive regulation of protein ubiquitination                                                                                                                                                                                                                                                                                                      | 6,407  | 12,911 |
| CHP2                               | arrested receptor protein signaling pathway, negative regulation of gene expression, positive regulation of low-density lipoprotein particle receptor biosynthetic process, regulation of low-density lipoprotein particle clearance                                                                                                                                                                                               | 6,407  | 12,911 |
| CYC8                               | activation of cysteine-type endopeptidase activity involved in apoptotic process by cytochrome c, intrinsic apoptotic signaling pathway                                                                                                                                                                                                                                                                                            | 12,134 | 12,911 |
| OMD1B12                            | extragenic biosynthetic process, positive regulation of cell-substrate adhesion                                                                                                                                                                                                                                                                                                                                                    | 4,837  | 12,911 |
| NA2H1                              | negative regulation of insulin secretion                                                                                                                                                                                                                                                                                                                                                                                           | 6,407  | 12,911 |
| CABT                               | negative regulation of endopeptidase activity, negative regulation of peptidase activity, negative regulation of type II pancreatic cell apoptotic process                                                                                                                                                                                                                                                                         | 3,174  | 12,911 |
| MPG05                              | positive regulation of apoptotic cell clearance, positive regulation of phagocytosis                                                                                                                                                                                                                                                                                                                                               | 4,837  | 12,911 |
| NA-C4                              | regulation of transcription, DNA-templated                                                                                                                                                                                                                                                                                                                                                                                         | 4,837  | 12,911 |
| CTUB1                              | negative regulation of double-strand break repair, negative regulation of histone H2A K63-linked ubiquitination                                                                                                                                                                                                                                                                                                                    | 6,407  | 12,911 |
| OTSA                               | negative regulation of chaperone-mediated autophagy, positive regulation of cell activity, regulation of chaperone-mediated autophagy, regulation of protein stability                                                                                                                                                                                                                                                             | 7,427  | 12,911 |
| VASP                               | positive regulation of actin filament polymerization                                                                                                                                                                                                                                                                                                                                                                               | 3,174  | 12,911 |
| DLD                                | cell redox homeostasis, regulation of acetyl-CoA biosynthetic process from pyruvate, regulation of membrane potential                                                                                                                                                                                                                                                                                                              | 4,837  | 12,911 |
| KPN4A                              | modulation by virus of host process                                                                                                                                                                                                                                                                                                                                                                                                | 8,334  | 12,911 |
| RP122                              | nuclear-transcribed mRNA catabolic process, nonsense-mediated decay                                                                                                                                                                                                                                                                                                                                                                | 6,407  | 12,911 |
| PLT11                              | BMK signaling pathway                                                                                                                                                                                                                                                                                                                                                                                                              | 9,334  | 12,911 |
| STAT2                              | JAK-STAT cascade, regulation of mitochondrial fusion, regulation of protein phosphorylation, regulation of transcription from RNA polymerase II promoter, regulation of type I interferon-mediated signaling pathway, signal transduction, type I interferon signaling pathway                                                                                                                                                     | 7,427  | 12,911 |
| ADPR1                              | activation of cysteine-type endopeptidase activity, activation of store-operated calcium channel activity, positive regulation of calcium ion transport into cytosol, positive regulation of intracellular protein transport, positive regulation of cytoskeletal assembly                                                                                                                                                         | 10,227 | 12,911 |
| ACLB3                              | positive regulation of Golgi to plasma membrane protein transport, positive regulation of phosphatidylcholine biosynthetic process, positive regulation of acroline, very-low-density lipoprotein particle assembly                                                                                                                                                                                                                | 11,211 | 12,911 |
| APXK1                              | cell redox homeostasis, negative regulation of nucleic acid metabolism, negative regulation of smooth muscle cell migration, positive regulation of DNA repair, positive regulation of G1/S transition of mitotic cell cycle, regulation of mRNA stability, regulation of transcription, DNA-templated, telomere main                                                                                                              | 12,134 | 12,911 |
| APR8                               | negative regulation of dendrite development, negative regulation of receptor-mediated endocytosis, positive regulation of actin filament polymerization, positive regulation of establishment of protein localization to plasma membrane, regulation of Rac prot                                                                                                                                                                   | 8,334  | 12,911 |
| DOB1                               | the signaling pathway, negative regulation of apoptotic process, positive regulation of protein complex stabilization, positive regulation by virus of viral protein levels in host cell, positive regulation of viral genome replication, positive regu                                                                                                                                                                           | 6,407  | 12,911 |
| BFH9                               | regulation of translational initiation                                                                                                                                                                                                                                                                                                                                                                                             | 9,334  | 12,911 |
| CHP1                               | cellular phospholipid homeostasis, negative regulation of cell growth, negative regulation of fat cell differentiation, negative regulation of glucose input, negative regulation of glycogen biosynthetic process, negative regulation of insulin receptor si                                                                                                                                                                     | 8,334  | 12,911 |
| P13                                | regulation of transcription, DNA-templated                                                                                                                                                                                                                                                                                                                                                                                         | 7,427  | 12,911 |
| REXA                               | BMAD protein signal transduction, lipid storage                                                                                                                                                                                                                                                                                                                                                                                    | 6,407  | 12,911 |
| LMA1                               | negative regulation of actin filament depolymerization                                                                                                                                                                                                                                                                                                                                                                             | 8,334  | 12,911 |
| NAK1                               | blood coagulation, positive regulation of organelle organization                                                                                                                                                                                                                                                                                                                                                                   | 8,334  | 12,911 |
| POR                                | negative regulation of cysteine-type endopeptidase activity involved in apoptotic process, negative regulation of lipase activity, positive regulation of cholesterol biosynthetic process, positive regulation of chondrocyte differentiation, positive regulation of smoothm                                                                                                                                                     | 9,334  | 12,911 |
| PCDML1                             | regulation of transcription, DNA-templated                                                                                                                                                                                                                                                                                                                                                                                         | 3,174  | 12,911 |
| PCD23                              | cell redox homeostasis, negative regulation of apoptotic process, negative regulation of cysteine-type endopeptidase activity involved in apoptotic process, negative regulation of kinase activity, positive regulation of NF-kappaB transcription factor activity, positive regulation of cell proliferation, regulation of m                                                                                                    | 7,427  | 12,911 |
| PRN2                               | negative regulation of actin filament polymerization, negative regulation of epithelial cell migration, negative regulation of rRNA assembly, positive regulation of ATPase activity, positive regulation of actin filament polymerization, positive regula                                                                                                                                                                        | 7,427  | 12,911 |
| PMK2C                              | Fc-epsilon receptor signaling pathway, MAPK cascade, NIK/NF-kappaB signaling, T cell receptor signaling pathway, Wnt signaling pathway, planar cell polarity pathway, negative regulation of canonical Wnt signaling pathway, negative regulation of ubiquitin-protein ligase activity involved in mitotic cell cycle, positive                                                                                                    | 4,837  | 12,911 |
| SEPT1                              | Fc-epsilon receptor signaling pathway, MAPK cascade, NIK/NF-kappaB signaling, T cell receptor signaling pathway, Wnt signaling pathway, planar cell polarity pathway, negative regulation of canonical Wnt signaling pathway, negative regulation of ubiquitin-protein ligase activity involved in mitotic cell cycle, positive                                                                                                    | 7,427  | 12,911 |
| WDR4                               | barbed-end actin filament capping, regulation of actin phosphorylation, regulation of actin monomers                                                                                                                                                                                                                                                                                                                               | 6,407  | 12,911 |
| TAB1BP3                            | iron protein signal transduction, Wnt signaling pathway, activation of GTPase activity, negative regulation of Wnt signaling pathway, negative regulation of cell proliferation, negative regulation of protein localization to cell surface, regulation of Wnt si                                                                                                                                                                 | 1,871  | 23,688 |
| SEK2                               | free ubiquitin chain polymerization, intrinsic apoptotic signaling pathway in response to endoplasmic reticulum stress, positive regulation of poly(ADP-ribose) phosphorylation, positive regulation of type I interferon-mediated signaling pathway, regula                                                                                                                                                                       | 6,407  | 12,911 |
| ATFVE1                             | insulin receptor signaling pathway, phagosome acidification, regulation of macrophage                                                                                                                                                                                                                                                                                                                                              | 6,407  | 12,911 |
| APB1                               | blood coagulation, positive regulation of NF-kB cell differentiation                                                                                                                                                                                                                                                                                                                                                               | 4,837  | 12,911 |
| CDH1                               | activation of MAPK activity, cell surface receptor signaling pathway, positive regulation of 1-phosphotyrosine 4-kinase activity, positive regulation of B cell proliferation, positive regulation of cell proliferation, positive regulation of peptidyl-L-tyrosine phosphorylation, positive regulation of protein catabolic process                                                                                             | 6,407  | 12,911 |
| RP121                              | nuclear-transcribed mRNA catabolic process, nonsense-mediated decay                                                                                                                                                                                                                                                                                                                                                                | 4,837  | 12,911 |
| PCOLCE                             | positive regulation of peptidase activity                                                                                                                                                                                                                                                                                                                                                                                          | 9,334  | 12,911 |
| BA1C1                              | Fc-epsilon receptor signaling pathway, Fc-gamma receptor signaling pathway involved in phagocytosis, G-protein coupled receptor signaling pathway, T cell costimulation, Wnt signaling pathway, planar cell polarity pathway, blood coagulation, bone resorption                                                                                                                                                                   | 7,427  | 12,911 |
| GPX1                               | cell redox homeostasis, intrinsic apoptotic signaling pathway in response to oxidative stress, negative regulation of cysteine-type endopeptidase activity involved in apoptotic process, negative regulation of extrinsic apoptotic signaling pathway via death                                                                                                                                                                   | 3,174  | 12,911 |
| RP118                              | nuclear-transcribed mRNA catabolic process, nonsense-mediated decay                                                                                                                                                                                                                                                                                                                                                                | 7,427  | 12,911 |
| CTNND1                             | Wnt signaling pathway, calcium modulating signaling pathway, beta-catenin destruction complex disassembly, bone resorption, bundle of fil-Fc-epsilon receptor signaling pathway, negative regulation of cell communication, canonical Wnt signaling pathway, canonical Wnt signaling pathway involved in m                                                                                                                         | 7,427  | 12,911 |
| CARM1                              | DNA damage response, signal transduction by p53 class mediator resulting in cell cycle arrest, intracellular ubiquitin receptor signaling pathway, negative regulation of dendrite development, negative regulation of protein binding, positive regulation of cell proliferation, posi                                                                                                                                            | 3,174  | 12,911 |
| EPF4                               | muscle cell cellular homeostasis, positive regulation of actin filament depolymerization                                                                                                                                                                                                                                                                                                                                           | 24,238 | 23,688 |
| DO18                               | arrested receptor protein signaling pathway, positive regulation of neuron differentiation, regulation of translation                                                                                                                                                                                                                                                                                                              | 7,427  | 12,911 |
| CHP2                               | nuclear-transcribed mRNA catabolic process, nonsense-mediated decay                                                                                                                                                                                                                                                                                                                                                                | 6,407  | 12,911 |
| IKNRP1                             | fibroblast growth factor receptor signaling pathway, regulation of RNA splicing                                                                                                                                                                                                                                                                                                                                                    | 7,427  | 23,688 |
| PRKX2                              | regulation of muscle contraction                                                                                                                                                                                                                                                                                                                                                                                                   | 4,837  | 12,911 |
| LMN1                               | negative regulation of transcription, DNA-templated, positive regulation of GTPase activity, positive regulation of cell-substrate adhesion, positive regulation of focal adhesion assembly, positive regulation of gene expression, positive regulation of substrate adhesion-dependent cell spreading, regulation of epithelial                                                                                                  | 6,407  | 12,911 |
| ME1                                | positive regulation of NADP metabolic process                                                                                                                                                                                                                                                                                                                                                                                      | 3,174  | 12,911 |
| PRKX2                              | Fc-epsilon receptor signaling pathway, MAPK cascade, NIK/NF-kappaB signaling, T cell receptor signaling pathway, Wnt signaling pathway, planar cell polarity pathway, negative regulation of canonical Wnt signaling pathway, negative regulation of ubiquitin-protein ligase activity involved in mitotic cell cycle, positive                                                                                                    | 7,427  | 12,911 |
| POMK12                             | Fc-epsilon receptor signaling pathway, MAPK cascade, NIK/NF-kappaB signaling, T cell receptor signaling pathway, Wnt signaling pathway, planar cell polarity pathway, negative regulation of canonical Wnt signaling pathway, negative regulation of ubiquitin-protein ligase activity involved in mitotic cell cycle, positive                                                                                                    | 3,174  | 12,911 |
| PTK7                               | canonical Wnt signaling pathway, planar cell polarity pathway involved in neural tube closure, positive regulation of neuron projection development, signal transduction                                                                                                                                                                                                                                                           | 6,407  | 12,911 |
| RP13A                              | nuclear-transcribed mRNA catabolic process, nonsense-mediated decay                                                                                                                                                                                                                                                                                                                                                                | 1,871  | 23,688 |
| TGFB11                             | the signaling pathway, androgen receptor signaling pathway, negative regulation of cell proliferation, negative regulation of transforming growth factor beta receptor signaling pathway, positive regulation of epithelial to mesenchymal transition, positive regulation of transcription, DNA-templated, positive regulation                                                                                                    | 1,871  | 23,688 |

<sup>1</sup>Exponentially Modified Protein Abundance Index ([http://www.martinsciencia.com/help/quant\\_empir\\_help.htm](http://www.martinsciencia.com/help/quant_empir_help.htm))

Table S8, Cont'd

| UniProt/Swiss-Prot<br>Accession ID | Biological Process<br>Molecular regulation                                                                                                                                                                                                                                                                                              | enrPAP |        |
|------------------------------------|-----------------------------------------------------------------------------------------------------------------------------------------------------------------------------------------------------------------------------------------------------------------------------------------------------------------------------------------|--------|--------|
|                                    |                                                                                                                                                                                                                                                                                                                                         | CCM    | OMIM   |
| TRIM2                              | Ras protein signal transduction, negative regulation of DNA demethylation, negative regulation of single stranded viral RNA replication via double stranded DNA intermediate, negative regulation of transcription from RNA polymerase II promoter, negative regulation of transcription, DNA-templated                                 | 6,541  | 19,176 |
| PRK29                              | Wnt signaling pathway                                                                                                                                                                                                                                                                                                                   | 6,541  | 19,176 |
| TNFR1L1                            | negative regulation of phosphorylation, positive regulation of protein insertion into mitochondrial membrane involved in apoptotic signaling pathway, regulation of transcription, DNA-templated                                                                                                                                        | 5,880  | 12,911 |
| BSR1                               | RET-mediated unfolded protein response, positive regulation of cell proliferation                                                                                                                                                                                                                                                       | 4,837  | 12,911 |
| ANCKY1                             | regulation of catalytic activity, regulation of cellular response to heat                                                                                                                                                                                                                                                               | 6,407  | 12,911 |
| DPF26                              | positive regulation of glucose                                                                                                                                                                                                                                                                                                          | 11,211 | 12,911 |
| PC2                                | chromatin silencing at telomere, regulation of transcription, DNA-templated                                                                                                                                                                                                                                                             | 7,427  | 12,911 |
| RP119                              | cellular response to glucose stimulus, positive regulation of insulin secretion                                                                                                                                                                                                                                                         | 1,871  | 23,688 |
| DNAJA1                             | nuclear-transcribed mRNA catabolic process, nonsense-mediated decay                                                                                                                                                                                                                                                                     | 6,407  | 12,911 |
| ERH1                               | androgen receptor signaling pathway, negative regulation of JNK kinase activity, negative regulation of apoptotic process, negative regulation of establishment of protein localization to mitochondrion, negative regulation of ribosome stress-induced ntri                                                                           | 7,427  | 12,911 |
| SDC1                               | positive regulation of Notch signaling pathway                                                                                                                                                                                                                                                                                          | 10,227 | 12,911 |
| NUTF2                              | phosphatidylinositol-mediated signaling, positive regulation of protein secretion, regulation of macrophage                                                                                                                                                                                                                             | 6,407  | 12,911 |
| RP114                              | negative regulation of vascular endothelial growth factor production, positive regulation of protein import into nucleus                                                                                                                                                                                                                | 3,174  | 12,911 |
| RP112                              | nuclear-transcribed mRNA catabolic process, nonsense-mediated decay                                                                                                                                                                                                                                                                     | 2,880  | 12,911 |
| RP128                              | nuclear-transcribed mRNA catabolic process, nonsense-mediated decay                                                                                                                                                                                                                                                                     | 6,407  | 12,911 |
| PTGSR3                             | nuclear-transcribed mRNA catabolic process, nonsense-mediated decay                                                                                                                                                                                                                                                                     | 6,407  | 12,911 |
| TNFR2                              | regulation of cellular response to heat, signal transduction, telomere maintenance                                                                                                                                                                                                                                                      | 3,174  | 12,911 |
| TNFR3                              | negative regulation of GTPase activity, positive regulation of gene expression                                                                                                                                                                                                                                                          | 4,837  | 12,911 |
| TNFR4                              | erythrocyte development, pointed-end actin filament capping, positive regulation of mitotic cell cycle phase transition                                                                                                                                                                                                                 | 7,427  | 12,911 |
| DNAJA2                             | positive regulation of cell proliferation                                                                                                                                                                                                                                                                                               | 7,427  | 12,911 |
| RP1A3                              | modulation by virus of host process                                                                                                                                                                                                                                                                                                     | 7,427  | 12,911 |
| TNFR2L2                            | T cell receptor signaling pathway, cellular calcium ion homeostasis, positive regulation of cardiomyocyte metabolic process, positive regulation of mitochondrial DNA replication, positive regulation of mitochondrial membrane potential                                                                                              | 3,174  | 12,911 |
| MAPK1                              | Wnt signaling pathway, positive regulation of Wnt signaling pathway, positive regulation of axon extension, regulation of epithelial cell migration, regulation of focal adhesion assembly, regulation of microtubule-based process                                                                                                     | 4,837  | 12,911 |
| PRKX2                              | Fc-epsilon receptor signaling pathway, MAPK cascade, NIK/NF-kappaB signaling, T cell receptor signaling pathway, Wnt signaling pathway, planar cell polarity pathway, negative regulation of canonical Wnt signaling pathway, negative regulation of ubiquitin-protein ligase activity involved in mitotic cell cycle, positive         | 7,427  | 12,911 |
| AMP2B                              | activation of cysteine-type endopeptidase activity involved in apoptotic process, negative regulation of cell differentiation, positive regulation of protein export from nucleus                                                                                                                                                       | 6,407  | 12,911 |
| NTSE                               | negative regulation of inflammatory response                                                                                                                                                                                                                                                                                            | 6,407  | 12,911 |
| ADRC1C1                            | cholesterol homeostasis, progesterone metabolic process                                                                                                                                                                                                                                                                                 | 6,407  | 12,911 |
| PIMT1                              | DNA damage response, signal transduction by p53 class mediator resulting in cell cycle arrest, cell surface receptor signaling pathway, negative regulation of megakaryocyte differentiation, positive regulation of erythrocyte differentiation, positive regulation of hemoglobin bios                                                | 6,407  | 12,911 |
| DYTNCL1                            | positive regulation of mitotic cell cycle spindle assembly checkpoint                                                                                                                                                                                                                                                                   | 6,407  | 12,911 |
| PUS2                               | regulation of nuclear acid-templated transcription                                                                                                                                                                                                                                                                                      | 6,407  | 12,911 |
| CHP2                               | G-protein coupled receptor signaling pathway, action potential, activation of phospholipase C activity, adenylate cyclase-activating G-protein coupled receptor signaling pathway, blood coagulation, entrainment of circadian clock, glutamate re                                                                                      | 3,174  | 12,911 |
| PRKX1A                             | activation of protein kinase A activity, blood coagulation, intracellular signal transduction, negative regulation of activated T cell proliferation, negative regulation of cAMP-dependent protein kinase activity, negative regulation of mitotic nuclear division, negative regulation of protein kinase activity, regulation of pro | 6,407  | 12,911 |
| NAK1                               | positive regulation of gene expression                                                                                                                                                                                                                                                                                                  | 6,407  | 12,911 |
| ME30                               | Wnt signaling pathway                                                                                                                                                                                                                                                                                                                   | 6,407  | 12,911 |
| PIMB1                              | Fc-epsilon receptor signaling pathway, MAPK cascade, NIK/NF-kappaB signaling, T cell receptor signaling pathway, Wnt signaling pathway, planar cell polarity pathway, negative regulation of canonical Wnt signaling pathway, negative regulation of ubiquitin-protein ligase activity involved in mitotic cell cycle, positive         | 2,880  | 12,911 |
| TPH2B                              | regulation of apoptotic process                                                                                                                                                                                                                                                                                                         | 6,407  | 12,911 |
| RP123A                             | nuclear-transcribed mRNA catabolic process, nonsense-mediated decay                                                                                                                                                                                                                                                                     | 2,880  | 12,911 |
| TRV2E                              | smoothed signaling pathway                                                                                                                                                                                                                                                                                                              | 6,407  | 12,911 |
| BD01                               | activation of MAPK activity, cellular iron ion homeostasis, muscle cell cellular homeostasis, myofibril cellular homeostasis, negative regulation of cholesterol biosynthetic process, negative regulation of neuron apoptotic process, positive regulation of apoptotic process, positive regulation of catalytic activity, positive   | 4,837  | 12,911 |
| SPR8B                              | RET-mediated unfolded protein response, small GTPase mediated signal transduction                                                                                                                                                                                                                                                       | 2,880  | 12,911 |
| TARD9P                             | 3'-UTR-mediated mRNA stabilization, negative regulation by host of viral transcription, negative regulation of protein phosphorylation, positive regulation of insulin secretion, positive regulation of transcription from RNA polymerase II promoter, regula                                                                          | 6,407  | 12,911 |
| AKR37                              | cellular calcium ion homeostasis, cellular water homeostasis, homeostasis, negative regulation of gene expression, regulation of cell shape                                                                                                                                                                                             | 4,837  | 12,911 |
| P2H1                               | negative regulation of cell proliferation                                                                                                                                                                                                                                                                                               | 3,174  | 12,911 |
| UBA2                               | positive regulation of catalytic activity                                                                                                                                                                                                                                                                                               | 2,880  | 12,911 |
| TNFR1                              | cell redox homeostasis                                                                                                                                                                                                                                                                                                                  | 2,880  | 12,911 |
| SLC3X                              | cell redox homeostasis, positive regulation of membrane potential, positive regulation of sodium ion transmembrane transporter activity                                                                                                                                                                                                 | 7,427  | 12,911 |
| AMP2A                              | intracellular signal transduction, regulation of apoptotic process, regulation of mRNA stability, regulation of transcription, DNA-templated                                                                                                                                                                                            | 2,880  | 12,911 |
| EPF8                               | regulation of translational initiation                                                                                                                                                                                                                                                                                                  | 1,871  | 12,911 |
| SLC3L3                             | negative regulation of T cell activation via T cell receptor contact with antigen bound to MHC molecules on antigen presenting cell, negative regulation of T cell receptor signaling pathway, negative regulation of endocytosis, negative regulation of extrinsic apoptotic signaling pathway, negative regulation of immunog         | 2,880  | 12,911 |
| IFV10D                             | negative regulation of phosphatase activity                                                                                                                                                                                                                                                                                             | 3,174  | 12,911 |
| PARGA                              | regulation of cell shape                                                                                                                                                                                                                                                                                                                | 4,837  | 12,911 |
| SEPTA                              | RET-mediated unfolded protein response                                                                                                                                                                                                                                                                                                  | 4,837  | 12,911 |
| TMK3                               | cell redox homeostasis                                                                                                                                                                                                                                                                                                                  | 3,174  | 12,911 |
| STI3                               | negative regulation of protein folding                                                                                                                                                                                                                                                                                                  | 2,880  | 12,911 |
| NDL2                               | protein retention in ER lumen                                                                                                                                                                                                                                                                                                           | 10,227 | 12,911 |
| NDL3                               | 3'-UTR-mediated mRNA stabilization, negative regulation of apoptotic process, negative regulation of intrinsic apoptotic signaling pathway in response to osmotic stress, negative regulation of necroptotic process, negative regulation of skeletal muscle tis                                                                        | 6,407  | 12,911 |
| UBD2E2                             | Fc-epsilon receptor signaling pathway, T cell receptor signaling pathway, TRP-dependent toll-like receptor signaling pathway, regulation of transcription from RNA polymerase II promoter in response to hypoxia, stimulatory C-type lectin receptor signaling pathway                                                                  | 6,407  | 12,911 |
| ADRC1A                             | Aryl2 complex-mediated actin nucleation, Fc-gamma receptor signaling pathway involved in phagocytosis, epsilon receptor signaling pathway, regulation of actin filament polymerization                                                                                                                                                  | 3,174  | 12,911 |

<sup>1</sup>Exponentially Modified Protein Abundance Index ([http://www.martinsciencia.com/help/quant\\_empir\\_help.htm](http://www.martinsciencia.com/help/quant_empir_help.htm))

**Table S7. Identification of endogenous proteins (Biological Process: metabolic process) in hADSC; group CDM & DMEM.**

| Table S7 Identification of endogenous proteins (Biological Process: metabolic process) in hADSC; group CDM & DMEM |                                                                                                                                                                                                                                                                                                             | Biological Process: metabolic process |         | UniProt |        |
|-------------------------------------------------------------------------------------------------------------------|-------------------------------------------------------------------------------------------------------------------------------------------------------------------------------------------------------------------------------------------------------------------------------------------------------------|---------------------------------------|---------|---------|--------|
| Accession ID                                                                                                      | Protein Name                                                                                                                                                                                                                                                                                                | Biological Process                    | UniProt | CDM     | DMEM   |
| MTF9                                                                                                              | ATP metabolic process, membrane protein ectodomain proteolysis                                                                                                                                                                                                                                              |                                       |         | 380.72  | 361.88 |
| FLNA                                                                                                              | mRNA transcription from RNA polymerase II promoter                                                                                                                                                                                                                                                          |                                       |         | 323.15  | 384.66 |
| HEP9AAB1                                                                                                          | chaperone-mediated autophagy, peptidyl-lysine phosphorylation, retrograde protein transport, ER to cytosol, ubiquitin-dependent ERAD pathway                                                                                                                                                                |                                       |         | 425.85  | 454.18 |
| HEP9AB1                                                                                                           | retrograde protein transport, ER to cytosol, ubiquitin-dependent ERAD pathway                                                                                                                                                                                                                               |                                       |         | 87.78   | 180.81 |
| HEP9AAB1                                                                                                          | chaperone-mediated autophagy, peptidyl-lysine phosphorylation                                                                                                                                                                                                                                               |                                       |         | 320.73  | 163.74 |
| ALS                                                                                                               | lipoprotein metabolic process                                                                                                                                                                                                                                                                               |                                       |         | 686.52  | 47.35  |
| EEF1A1                                                                                                            | transcription, DNA-templated, translation, translational elongation                                                                                                                                                                                                                                         |                                       |         | 382.83  | 376.83 |
| HEP9A                                                                                                             | ATP metabolic process, chaperone-mediated protein transport involved in chaperone-mediated autophagy, late endosomal microautophagy, mRNA processing, mRNA splicing, via spliceosome, protein targeting to lysosome involved in chaperone-mediated autophagy, proteolysis involved in cellular              |                                       |         | 361.59  | 359.58 |
| HEP9A1A                                                                                                           | ATP metabolic process                                                                                                                                                                                                                                                                                       |                                       |         | 15.88   | 51.88  |
| PKM                                                                                                               | canonical glycolysis, glycolytic process, metabolic process, phosphorylation                                                                                                                                                                                                                                |                                       |         | 285.10  | 434.80 |
| TYRHA1                                                                                                            | glucocorticoid catabolic process                                                                                                                                                                                                                                                                            |                                       |         | 69.27   | 361.32 |
| ENO1                                                                                                              | canonical glycolysis, gluconeogenesis, glycolytic process, transcription, DNA-templated                                                                                                                                                                                                                     |                                       |         | 254.94  | 273.38 |
| ENO2                                                                                                              | canonical glycolysis, gluconeogenesis, glycolytic process                                                                                                                                                                                                                                                   |                                       |         | 79.84   | 27.98  |
| ACTA1                                                                                                             | MAPK cascade                                                                                                                                                                                                                                                                                                |                                       |         | 135.47  | 514.44 |
| CLTC                                                                                                              | receptor internalization                                                                                                                                                                                                                                                                                    |                                       |         | 163.42  | 243.23 |
| PAH8                                                                                                              | lipoprotein biosynthetic process, peptidyl-proline hydroxylation, peptidyl-proline hydroxylation to 4-hydroxy-L-proline                                                                                                                                                                                     |                                       |         | 138.34  | 236.78 |
| LDHA                                                                                                              | NAD metabolic process, carboxylate metabolic process, glycolytic process, lactate metabolic process, oxidation-reduction process, pyruvate metabolic process                                                                                                                                                |                                       |         | 167.29  | 459.48 |
| EEF2                                                                                                              | peptidyl-dihydramide biosynthetic process from peptidyl-histidine, translation, translational elongation                                                                                                                                                                                                    |                                       |         | 162.49  | 189.42 |
| ALDOA                                                                                                             | ATP biosynthetic process, canonical glycolysis, fructose 1,6-bisphosphate metabolic process, fructose metabolic process, gluconeogenesis, glycolytic process                                                                                                                                                |                                       |         | 119.19  | 279.82 |
| ALDOA                                                                                                             | canonical glycolysis, fructose 1,6-bisphosphate metabolic process, fructose metabolic process, gluconeogenesis, glycolytic process                                                                                                                                                                          |                                       |         | 17.74   | 75.34  |
| PN1                                                                                                               | peptide cross-linking                                                                                                                                                                                                                                                                                       |                                       |         | 97.12   | 251.43 |
| COL1A3                                                                                                            | collagen catabolic process                                                                                                                                                                                                                                                                                  |                                       |         | 128.87  | 180.81 |
| COL1A1                                                                                                            | collagen biosynthetic process, collagen catabolic process                                                                                                                                                                                                                                                   |                                       |         | 75.88   | 226.89 |
| BERPNNH1                                                                                                          | collagen biosynthetic process, protein maturation                                                                                                                                                                                                                                                           |                                       |         | 127.94  | 159.28 |
| IQGAP1                                                                                                            | ERK1 and ERK2 cascade                                                                                                                                                                                                                                                                                       |                                       |         | 101.73  | 191.57 |
| UBA1                                                                                                              | cellular protein modification process, modification-dependent protein catabolic process, protein ubiquitination                                                                                                                                                                                             |                                       |         | 161.66  | 163.88 |
| FA3N                                                                                                              | acetyl-CoA biosynthetic process, biosynthetic process, fatty acid biosynthetic process, lipid biosynthetic process, long-chain fatty-acyl-CoA biosynthetic process, oxidation-reduction process, pantothenate metabolic process                                                                             |                                       |         | 130.74  | 96.88  |
| CALR                                                                                                              | protein maturation by protein folding                                                                                                                                                                                                                                                                       |                                       |         | 119.80  | 120.54 |
| ATP5B                                                                                                             | ATP metabolic process, ER-associated metabolic catabolic process, NADH metabolic process, endoplasmic reticulum, autophagy, double-strand break repair, error-free translation synthesis, flavin adenosine dinucleotide catabolic process, proteasome-mediated ubiquitin-dependent p                        |                                       |         | 107.12  | 181.52 |
| PC1A3                                                                                                             | oxidation-reduction process, proteolysis                                                                                                                                                                                                                                                                    |                                       |         | 84.98   | 142.68 |
| THBS1                                                                                                             | peptide cross-linking, protein O-linked fucosylation                                                                                                                                                                                                                                                        |                                       |         | 82.18   | 148.52 |
| VCP                                                                                                               | ATP metabolic process, ER-associated metabolic catabolic process, NADH metabolic process, endoplasmic reticulum, autophagy, double-strand break repair, error-free translation synthesis, flavin adenosine dinucleotide catabolic process, proteasome-mediated ubiquitin-dependent p                        |                                       |         | 82.18   | 148.52 |
| ANPEP                                                                                                             | protein catabolic process, proteolysis                                                                                                                                                                                                                                                                      |                                       |         | 100.88  | 96.88  |
| OSN                                                                                                               | amyloid fibril formation, cellular protein metabolic process                                                                                                                                                                                                                                                |                                       |         | 88.85   | 99.01  |
| ANKK5                                                                                                             | emphysema                                                                                                                                                                                                                                                                                                   |                                       |         | 16.97   | 109.28 |
| MSN                                                                                                               | receptor internalization                                                                                                                                                                                                                                                                                    |                                       |         | 55.83   | 139.81 |
| ER2                                                                                                               | receptor internalization                                                                                                                                                                                                                                                                                    |                                       |         | 14.94   | 32.29  |
| HEP9C1                                                                                                            | histone switching to ligand hydrolysis, protein maturation                                                                                                                                                                                                                                                  |                                       |         | 75.29   | 16.29  |
| ACLY                                                                                                              | acetyl-CoA biosynthetic process, cholesterol biosynthetic process, cholate metabolic process, fatty acid biosynthetic process, lipid biosynthetic process, long-chain fatty-acyl-CoA biosynthetic process, oxaloacetate metabolic process                                                                   |                                       |         | 75.87   | 155.47 |
| COL1A1                                                                                                            | collagen catabolic process                                                                                                                                                                                                                                                                                  |                                       |         | 75.84   | 81.79  |
| DEPT1                                                                                                             | glutathione derivative biosynthetic process, glutathione metabolic process, metabolic acid metabolic process, metabolic process, xenobiotic metabolic process                                                                                                                                               |                                       |         | 82.82   | 132.45 |
| HEP9A1                                                                                                            | RNA secondary structure unwinding, RNA splicing, mRNA 5' and processing, mRNA export from nucleus, mRNA splicing, via spliceosome, nuclear-transcribed mRNA catabolic process, nonsense-mediated decay, nuclear-transcribed mRNA poly(A) tail shortening, mRNA processing, selenocysteine metabolic process |                                       |         | 75.97   | 38.74  |
| EFNA2                                                                                                             | RNA secondary structure unwinding, nuclear-transcribed mRNA poly(A) tail shortening, translation, translational initiation                                                                                                                                                                                  |                                       |         | 29.88   | 38.74  |
| TPH1                                                                                                              | canonical glycolysis, gluconeogenesis, glycerolaldehyde-3-phosphate biosynthetic process, glycerolaldehyde-3-phosphate metabolic process, glycerolaldehyde-3-phosphate shunt                                                                                                                                |                                       |         | 55.77   | 107.62 |
| TKT                                                                                                               | glycerolaldehyde-3-phosphate biosynthetic process, pentose-phosphate shunt, pentose-phosphate shunt, non-oxidative branch, xylulose biosynthetic process                                                                                                                                                    |                                       |         | 75.84   | 83.85  |
| ARF4                                                                                                              | phosphatidylinositol biosynthetic process, protein ADP-ribosylation                                                                                                                                                                                                                                         |                                       |         | 75.38   | 89.27  |
| ARF3                                                                                                              | phosphatidylinositol biosynthetic process                                                                                                                                                                                                                                                                   |                                       |         | 46.89   | 23.85  |
| ARF3                                                                                                              | phosphatidylinositol biosynthetic process                                                                                                                                                                                                                                                                   |                                       |         | 46.16   | 17.52  |
| CAPN2                                                                                                             | protein autophagy, proteolysis involved in cellular protein catabolic process                                                                                                                                                                                                                               |                                       |         | 75.84   | 86.18  |
| LDHB                                                                                                              | NAD metabolic process, carboxylate metabolic process, lactate metabolic process, oxidation-reduction process, pyruvate metabolic process                                                                                                                                                                    |                                       |         | 93.39   | 133.85 |
| LRPI                                                                                                              | lipoprotein metabolic process, retinol metabolic process                                                                                                                                                                                                                                                    |                                       |         | 48.88   | 124.64 |
| CAKAP4                                                                                                            | cellular protein metabolic process                                                                                                                                                                                                                                                                          |                                       |         | 34.55   | 152.42 |
| CAKAP4                                                                                                            | carboxylate metabolic process                                                                                                                                                                                                                                                                               |                                       |         | 37.38   | 109.47 |
| CAKAP4                                                                                                            | carboxylate metabolic process                                                                                                                                                                                                                                                                               |                                       |         | 89.75   | 73.13  |
| PGAM1                                                                                                             | canonical glycolysis, gluconeogenesis, glycolytic process, respiratory burst                                                                                                                                                                                                                                |                                       |         | 32.89   | 159.07 |
| PGAM1                                                                                                             | gluconeogenesis, glycolytic process                                                                                                                                                                                                                                                                         |                                       |         | 32.89   | 159.07 |
| HEP9B1                                                                                                            | apoptosis, DNA T-ageration                                                                                                                                                                                                                                                                                  |                                       |         | 55.77   | 79.49  |
| CTSD                                                                                                              | autophagy, collagen catabolic process, protein catabolic process, proteolysis                                                                                                                                                                                                                               |                                       |         | 45.16   | 103.52 |
| ANKK1                                                                                                             | DNA strand resection, peptide cross-linking                                                                                                                                                                                                                                                                 |                                       |         | 51.36   | 88.23  |
| EPFA                                                                                                              | mRNA export from nucleus, peptidyl-lysine modification to peptidyl-histidine, translation, translational translocation                                                                                                                                                                                      |                                       |         | 82.18   | 39.13  |
| EPFA2                                                                                                             | peptidyl-lysine modification to peptidyl-histidine, translation, translational elongation, translational translocation                                                                                                                                                                                      |                                       |         | 15.88   | 19.27  |
| COL1A2                                                                                                            | collagen catabolic process                                                                                                                                                                                                                                                                                  |                                       |         | 30.82   | 118.39 |
| PP1B                                                                                                              | protein peptidyl-prolyl isomerization                                                                                                                                                                                                                                                                       |                                       |         | 45.49   | 77.49  |
| STAT1                                                                                                             | transcription, DNA-templated                                                                                                                                                                                                                                                                                |                                       |         | 55.97   | 64.57  |
| ATP5A1                                                                                                            | ATP metabolic process, ATP synthesis coupled proton transport, electron transport chain, lipid metabolic process, mitochondrial ATP synthesis coupled proton transport                                                                                                                                      |                                       |         | 44.83   | 82.88  |
| ARS                                                                                                               | histonecy-RNA aminoacylation, translation                                                                                                                                                                                                                                                                   |                                       |         | 45.78   | 89.25  |
| TDO                                                                                                               | glycerol ether metabolic process, nucleoside-containing small molecule interconversion, oxidation-reduction process, protein repair, sulfate assimilation, transcription, DNA-templated                                                                                                                     |                                       |         | 91.38   | 79.84  |
| RH1                                                                                                               | mRNA catabolic process                                                                                                                                                                                                                                                                                      |                                       |         | 42.02   | 96.88  |
| CLC1                                                                                                              | glutathione metabolic process                                                                                                                                                                                                                                                                               |                                       |         | 46.83   | 84.27  |
| SPYB2                                                                                                             | nucleoside-containing compound metabolic process                                                                                                                                                                                                                                                            |                                       |         | 42.02   | 129.15 |
| BNP1                                                                                                              | RNA catabolic process, nucleic acid phosphodiester bond hydrolysis, transcription, DNA-templated                                                                                                                                                                                                            |                                       |         | 42.02   | 83.85  |
| PF1D3                                                                                                             | hydrogen peroxide catabolic process, lipid catabolic process, lipid metabolic process, oxidation-reduction process                                                                                                                                                                                          |                                       |         | 46.88   | 84.27  |
| EP1D3                                                                                                             | glutathione metabolic process, translation, translational elongation                                                                                                                                                                                                                                        |                                       |         | 46.83   | 89.73  |
| PAFA1                                                                                                             | oxidation-reduction process, peptidyl-proline hydroxylation to 4-hydroxy-L-proline                                                                                                                                                                                                                          |                                       |         | 32.89   | 83.85  |
| PAFA1                                                                                                             | cardiolipin acyl-chain remodeling, fatty acid beta-oxidation, fatty acid metabolic process, lipid metabolic process, oxidation-reduction process                                                                                                                                                            |                                       |         | 42.98   | 89.73  |
| UDPP                                                                                                              | UDP-glucose metabolic process, UDP-glucuronate biosynthetic process, glucose 1-phosphate metabolic process, glycerol biosynthetic process                                                                                                                                                                   |                                       |         | 35.15   | 71.85  |
| UDPP                                                                                                              | 2-oxoglutarate metabolic process, NADPH regeneration, glutathione metabolic process, glyoxylate cycle, succinate metabolic process, tricarballic acid cycle                                                                                                                                                 |                                       |         | 35.29   | 64.57  |
| EPF5                                                                                                              | glutathione-RNA aminoacylation, poly-RNA aminoacylation, translation                                                                                                                                                                                                                                        |                                       |         | 37.75   | 73.18  |
| PSAP                                                                                                              | glycosylated metabolic process, lipid metabolic process, sphingolipid metabolic process                                                                                                                                                                                                                     |                                       |         | 35.29   | 59.96  |
| CT1B                                                                                                              | collagen catabolic process, proteolysis involved in cellular protein catabolic process                                                                                                                                                                                                                      |                                       |         | 42.02   | 45.89  |
| PAFA2                                                                                                             | oxidation-reduction process, peptidyl-proline hydroxylation                                                                                                                                                                                                                                                 |                                       |         | 32.89   | 75.34  |
| AARS                                                                                                              | aminoacyl-RNA aminoacylation, RNA aminoacylation, RNA modification, translation                                                                                                                                                                                                                             |                                       |         | 25.02   | 89.16  |
| PRKDC                                                                                                             | DNA recombination, T cell receptor V(D)J recombination, V(D)J recombination, cellular protein modification process, double-strand break repair, double-strand break repair via alternative nonhomologous end joining, immunoglobulin V(D)J recombination, peptidyl-serine phosphorylation, phospho          |                                       |         | 91.38   | 25.83  |
| UCHL1                                                                                                             | proteasome-mediated ubiquitin-dependent protein catabolic process, protein deubiquitination                                                                                                                                                                                                                 |                                       |         | 25.85   | 53.81  |
| NMT1                                                                                                              | methyltransferase                                                                                                                                                                                                                                                                                           |                                       |         | 32.89   | 62.42  |
| RPN2                                                                                                              | protein N-linked glycosylation via asparagine                                                                                                                                                                                                                                                               |                                       |         | 38.42   | 45.81  |
| MME                                                                                                               | argininemia maturation, beta-amyloid metabolic process, creatinine metabolic process, proteolysis                                                                                                                                                                                                           |                                       |         | 37.75   | 62.42  |
| BSBP1                                                                                                             | translation                                                                                                                                                                                                                                                                                                 |                                       |         | 22.41   | 77.49  |
| UDOH                                                                                                              | UDP-glucose metabolic process, UDP-glucuronate biosynthetic process, carboxylate metabolic process, glycosaminoglycan biosynthetic process, oxidation-reduction process                                                                                                                                     |                                       |         | 25.85   | 64.57  |
| TOPBP1                                                                                                            | cellular protein metabolic process                                                                                                                                                                                                                                                                          |                                       |         | 39.22   | 36.89  |
| PABK1                                                                                                             | autophagy, enzyme active site formation via L-cysteine sulfenic acid, glutathione degradation, glycolate biosynthetic process, glyoxal catabolic process, glyoxal metabolic process, hydrogen peroxide metabolic process, lactate biosynthetic process, methylgly                                           |                                       |         | 39.82   | 91.46  |
| FAP                                                                                                               | proteolysis involved in cellular protein catabolic process                                                                                                                                                                                                                                                  |                                       |         | 19.81   | 83.85  |
| UDOT1                                                                                                             | ER-associated metabolic protein catabolic process, UDP-glucylation, endoplasmic reticulum mannose trimming, protein N-linked glycosylation via asparagine                                                                                                                                                   |                                       |         | 25.21   | 69.73  |
| VAT1                                                                                                              | oxidation-reduction process                                                                                                                                                                                                                                                                                 |                                       |         | 25.15   | 69.73  |
| GP1                                                                                                               | aldehyde catabolic process, canonical glycolysis, carboxylate metabolic process, gluconeogenesis, glucose 6-phosphate metabolic process, glycolytic process, methylglyoxal biosynthetic process                                                                                                             |                                       |         | 41.09   | 45.89  |
| PPKP                                                                                                              | canonical glycolysis, fructose 1,6-bisphosphate metabolic process, fructose 6-phosphate metabolic process, glycolytic process through fructose-6-phosphate, phosphorylation                                                                                                                                 |                                       |         | 25.29   | 81.79  |
| RPN1                                                                                                              | protein N-linked glycosylation via asparagine, protein glycosylation                                                                                                                                                                                                                                        |                                       |         | 17.74   | 73.18  |
| XRC5                                                                                                              | DNA recombination, double-strand break repair, double-strand break repair via nonhomologous end joining, telomere maintenance, transcription, DNA-templated                                                                                                                                                 |                                       |         | 34.55   | 43.89  |
| PRDX1                                                                                                             | hydrogen peroxide catabolic process, oxidation-reduction process, removal of superoxide radicals                                                                                                                                                                                                            |                                       |         | 35.29   | 69.27  |
| SEPD                                                                                                              | NADPH regeneration, carboxylate metabolic process, cholesterol biosynthetic process, glucose 6-phosphate metabolic process, glucose metabolic process, glutathione metabolic process, oxidation-reduction process, pentose biosynthetic process, pentose-phosphate shunt, pentose-ph                        |                                       |         | 24.23   | 69.27  |
| PEMD2                                                                                                             | MAPK cascade, anaphase-promoting complex-dependent catabolic process, protein polyubiquitination                                                                                                                                                                                                            |                                       |         | 26.15   | 58.13  |

\*Exponentially Modified Protein Abundance Index ([http://www.mabscience.com/help/quant\\_empai\\_help.html](http://www.mabscience.com/help/quant_empai_help.html))

Table S7. Cont 1

| UniProt/Swiss-Prot ID | Biological Process                                                                                                                                                                                                                                                                                                      | emPA <sup>1</sup> | CCM    | DMEM   |
|-----------------------|-------------------------------------------------------------------------------------------------------------------------------------------------------------------------------------------------------------------------------------------------------------------------------------------------------------------------|-------------------|--------|--------|
| RPSA                  | endonucleolytic cleavage in ITS1 to separate SSU-rRNA from 5.8S rRNA and LSU-rRNA from trichotomic rRNA transcript (SSU-rRNA, 5.8S rRNA, LSU-rRNA), endonucleolytic cleavage to generate mature 5' and 3' of SSU-rRNA from (SSU-rRNA, 5.8S rRNA, LSU-rRNA), nuclear-transcribed mRNA catabolic process, mRNA processing | 51.66             | 81.86  | 81.86  |
| CLIC4                 | glutathione metabolic process                                                                                                                                                                                                                                                                                           | 71.03             | 64.57  | 64.57  |
| LRPPRC                | transcription, DNA-templated                                                                                                                                                                                                                                                                                            | 34.44             | 103.52 | 103.52 |
| NDH2                  | NADH metabolic process, carbohydrate metabolic process, gluconeogenesis, internal protein amino acid acetylation, malate metabolic process, oxaloacetate metabolic process, oxidation-reduction process, tricarboxylic acid cycle                                                                                       | 56.13             | 72.16  | 72.16  |
| COL12A1               | collagen catabolic process                                                                                                                                                                                                                                                                                              | 111.93            | 55.96  | 55.96  |
| PSEN1                 | MAPK cascade, anaphase-promoting complex-dependent catabolic process, protein polyubiquitination                                                                                                                                                                                                                        | 60.27             | 40.90  | 40.90  |
| PP2D1A                | RNA splicing, serine metabolic process, nuclear-transcribed mRNA catabolic process, nonsense-mediated decay, peptidyl-serine dephosphorylation                                                                                                                                                                          | 38.74             | 79.10  | 79.10  |
| POD                   | D-glucose metabolic process, oxidation-reduction process, pentose biosynthetic process, pentose-phosphate shunt, pentose-phosphate shunt, oxidative branch                                                                                                                                                              | 34.44             | 58.13  | 58.13  |
| CAPN31                | proteolysis                                                                                                                                                                                                                                                                                                             | 47.35             | 86.19  | 86.19  |
| DNMT2                 | oxidation-reduction process                                                                                                                                                                                                                                                                                             | 81.79             | 49.57  | 49.57  |
| DNMT2                 | DNA methylation, GTP metabolic process, energy reserve metabolic process, genetic imprinting                                                                                                                                                                                                                            | 55.96             | 60.27  | 60.27  |
| GNA5                  | DNA methylation, energy reserve metabolic process, genetic imprinting                                                                                                                                                                                                                                                   | 17.22             | 25.83  | 25.83  |
| ITGB1                 | receptor internalization                                                                                                                                                                                                                                                                                                | 55.96             | 53.81  | 53.81  |
| MAPK1                 | DNA damage induced protein phosphorylation, ERK1 and ERK2 cascade, MAPK cascade in response to starvation, MAPK cascade involved in osmosensory signaling pathway, MAPK import into nucleus, arachidonic acid metabolic process, cytosine metabolic process, glycoaminoglycan biosynthetic                              | 38.74             | 79.10  | 79.10  |
| MAPK3                 | DNA damage induced protein phosphorylation, ERK1 and ERK2 cascade, arachidonic acid metabolic process, peptidyl-serine phosphorylation, peptidyl-tyrosine autophosphorylation, phosphorylation, transcription initiation from RNA polymerase I promoter, transcription, DNA-t                                           | 10.76             | 75.34  | 75.34  |
| POCDBP                | ubiquitin-independent protein catabolic process via the multivesicular body sorting pathway                                                                                                                                                                                                                             | 45.20             | 64.57  | 64.57  |
| NAK5                  | RNA aminoacylation for protein translation, translation, tryptophanyl-RNA aminoacylation                                                                                                                                                                                                                                | 73.10             | 58.25  | 58.25  |
| NDH1                  | NAD metabolic process, NADH metabolic process, carbohydrate metabolic process, carboxylic acid metabolic process, gluconeogenesis, malate metabolic process, oxaloacetate metabolic process, oxidation-reduction process, tricarboxylic acid cycle                                                                      | 32.29             | 62.42  | 62.42  |
| PPP1CA                | carbohydrate metabolic process, dephosphorylation, glycogen metabolic process, regulation of translational initiation by eIF2 alpha dephosphorylation                                                                                                                                                                   | 27.98             | 77.49  | 77.49  |
| PPP1C2                | glycogen metabolic process, protein dephosphorylation                                                                                                                                                                                                                                                                   | 25.83             | 36.59  | 36.59  |
| RAB19                 | autophagosome assembly, autophagy, peptidyl-cysteine methylation                                                                                                                                                                                                                                                        | 64.57             | 73.10  | 73.10  |
| RAB1B                 | autophagy                                                                                                                                                                                                                                                                                                               | 27.98             | 38.74  | 38.74  |
| RAB1A                 | autophagosome assembly, autophagy                                                                                                                                                                                                                                                                                       | 32.29             | 10.76  | 10.76  |
| SPTAN1                | MAPK cascade                                                                                                                                                                                                                                                                                                            | 51.66             | 51.66  | 51.66  |
| OCN1                  | translation                                                                                                                                                                                                                                                                                                             | 55.96             | 47.35  | 47.35  |
| PHH1                  | collagen metabolic process, oxidation-reduction process, peptidyl-proline hydroxylation, protein hydroxylation                                                                                                                                                                                                          | 47.35             | 61.95  | 61.95  |
| COL4A2                | collagen catabolic process                                                                                                                                                                                                                                                                                              | 38.74             | 61.95  | 61.95  |
| MEF                   | carboxylic acid metabolic process, prostaglandin biosynthetic process                                                                                                                                                                                                                                                   | 38.74             | 61.95  | 61.95  |
| PLD1                  | cellular protein modification process, hydroxylysine biosynthetic process, oxidation-reduction process                                                                                                                                                                                                                  | 43.90             | 40.90  | 40.90  |
| AT7V1A                | ATP metabolic process                                                                                                                                                                                                                                                                                                   | 60.27             | 58.13  | 58.13  |
| YODAC1                | macroautophagy                                                                                                                                                                                                                                                                                                          | 90.40             | 43.09  | 43.09  |
| HDLBP                 | cholesterol metabolic process                                                                                                                                                                                                                                                                                           | 68.89             | 38.59  | 38.59  |
| PKBP12                | protein-peptidyl-prolyl isomerization                                                                                                                                                                                                                                                                                   | 60.27             | 60.27  | 60.27  |
| HNRNPK                | gene expression, mRNA processing, mRNA splicing, via spliceosome, protein sumoylation, transcription from RNA polymerase II promoter, transcription, DNA-templated                                                                                                                                                      | 38.74             | 66.73  | 66.73  |
| PT08                  | 5-phosphoribose 1-diphosphate biosynthetic process, glycogen catabolic process, metabolic process                                                                                                                                                                                                                       | 38.74             | 60.27  | 60.27  |
| PT02                  | 5-phosphoribose 1-diphosphate biosynthetic process, glycogen catabolic process                                                                                                                                                                                                                                          | 47.35             | 61.95  | 61.95  |
| SARS                  | selenocysteine metabolic process, selenocysteinyl-RNA(Sec) biosynthetic process, seryl-RNA aminoacylation, tRNA processing, translation                                                                                                                                                                                 | 43.09             | 51.66  | 51.66  |
| PHGDH                 | L-serine biosynthetic process, cellular amino acid biosynthetic process, gamma-aminobutyric acid metabolic process, glutamine metabolic process, glycine metabolic process, oxidation-reduction process, serine family amino acid biosynthetic process, taurine metabolic process, threonine metabolic process          | 77.49             | 71.03  | 71.03  |
| DRDC6                 | DNA ligase, DNA recombination, double-strand break repair via classical nonhomologous end joining, telomere maintenance, transcription, DNA-templated                                                                                                                                                                   | 38.74             | 61.95  | 61.95  |
| SDT01                 | L-ascorbic acid metabolic process, glutathione derivative biosynthetic process, glutathione metabolic process, methylation, oxidation-reduction process, xenobiotic catabolic process                                                                                                                                   | 30.13             | 34.44  | 34.44  |
| LMOT                  | protein ubiquitination                                                                                                                                                                                                                                                                                                  | 86.10             | 71.03  | 71.03  |
| NPR1                  | DNA repair                                                                                                                                                                                                                                                                                                              | 27.98             | 60.27  | 60.27  |
| SDOST                 | protein-N-linked glycosylation, protein-N-linked glycosylation via asparagine                                                                                                                                                                                                                                           | 36.59             | 38.74  | 38.74  |
| CAND1                 | protein ubiquitination                                                                                                                                                                                                                                                                                                  | 38.74             | 47.35  | 47.35  |
| ESD                   | formaldehyde catabolic process, glutathione derivative biosynthetic process                                                                                                                                                                                                                                             | 34.44             | 81.79  | 81.79  |
| ESBP1                 | MAPK cascade                                                                                                                                                                                                                                                                                                            | 30.13             | 55.96  | 55.96  |
| RPL9                  | cytoplasmic translation, nuclear-transcribed mRNA catabolic process, nonsense-mediated decay, rRNA processing, translation, translational initiation, viral transcription                                                                                                                                               | 49.51             | 17.22  | 17.22  |
| RPB3                  | DNA repair, nuclear-transcribed mRNA catabolic process, nonsense-mediated decay, rRNA processing, transcription, DNA-templated, translation, translational initiation, viral transcription                                                                                                                              | 51.66             | 55.96  | 55.96  |
| PRAT1                 | L-serine biosynthetic process, cellular amino acid biosynthetic process, pyridoxine biosynthetic process                                                                                                                                                                                                                | 64.57             | 34.44  | 34.44  |
| RPL12                 | nuclear-transcribed mRNA catabolic process, nonsense-mediated decay, rRNA processing, translation, translational initiation, viral transcription                                                                                                                                                                        | 25.83             | 10.76  | 10.76  |
| RPB7                  | nuclear-transcribed mRNA catabolic process, nonsense-mediated decay, rRNA processing, translation, translational initiation, viral transcription                                                                                                                                                                        | 27.98             | 45.20  | 45.20  |
| CAPN1                 | proteolysis, receptor catabolic process                                                                                                                                                                                                                                                                                 | 36.59             | 73.10  | 73.10  |
| PRDX4                 | 4-hydroxyproline metabolic process, hsp90AB phosphorylation, oxidation-reduction process, protein maturation by protein folding, reactive oxygen species metabolic process                                                                                                                                              | 60.27             | 27.98  | 27.98  |
| VARS                  | RNA aminoacylation for protein translation, translation, valyl-RNA aminoacylation                                                                                                                                                                                                                                       | 34.44             | 25.83  | 25.83  |
| EEF2B2                | translation, translational elongation                                                                                                                                                                                                                                                                                   | 43.09             | 44.67  | 44.67  |
| RPL7A                 | maturation of LSU-rRNA, nuclear-transcribed mRNA catabolic process, nonsense-mediated decay, rRNA processing, translation, translational initiation, viral transcription                                                                                                                                                | 30.13             | 12.91  | 12.91  |
| CTBK                  | collagen catabolic process, proteolysis involved in cellular protein catabolic process                                                                                                                                                                                                                                  | 12.91             | 27.98  | 27.98  |
| NBE1                  | UTP biosynthetic process, DNA metabolic process, GTP biosynthetic process, UTP biosynthetic process, nucleobase-containing small molecule interconversion, nucleoside diphosphate phosphorylation, phosphorylation, pyrimidine nucleotide metabolic process                                                             | 36.59             | 32.29  | 32.29  |
| PRDX3                 | NADPH oxidation, hydrogen peroxide catabolic process, oxidation-reduction process, reactive nitrogen species metabolic process                                                                                                                                                                                          | 49.51             | 51.66  | 51.66  |
| SPTBN1                | MAPK cascade, common-partner SMAD protein phosphorylation                                                                                                                                                                                                                                                               | 38.74             | 47.35  | 47.35  |
| ALDH1L2               | 10-formyltetrahydrofolate catabolic process, biosynthetic process, folic acid metabolic process, metabolic process, one-carbon metabolic process, oxidation-reduction process                                                                                                                                           | 45.20             | 40.90  | 40.90  |
| NUPF1                 | peptide catabolic process, proteolysis                                                                                                                                                                                                                                                                                  | 21.52             | 45.20  | 45.20  |
| ATP1A1                | dephosphorylation                                                                                                                                                                                                                                                                                                       | 17.22             | 77.49  | 77.49  |
| NAP1L1                | DNA replication                                                                                                                                                                                                                                                                                                         | 32.29             | 55.96  | 55.96  |
| PTBP1                 | MEI3-dependent viral translational initiation, alternative mRNA splicing, via spliceosome, gene expression, mRNA processing, mRNA splicing, via spliceosome                                                                                                                                                             | 49.51             | 47.35  | 47.35  |
| ATP6V1B2              | ATP metabolic process                                                                                                                                                                                                                                                                                                   | 49.51             | 30.13  | 30.13  |
| PCBP1                 | gene expression, mRNA splicing, via spliceosome, viral RNA genome replication                                                                                                                                                                                                                                           | 49.51             | 60.27  | 60.27  |
| PLD3                  | cellular protein modification process, oxidation-reduction process                                                                                                                                                                                                                                                      | 45.20             | 67.43  | 67.43  |
| RPS3A                 | nuclear-transcribed mRNA catabolic process, nonsense-mediated decay, rRNA processing, translation, translational initiation, viral transcription                                                                                                                                                                        | 43.09             | 66.73  | 66.73  |
| TXNRD1                | nucleobase-containing small molecule interconversion, oxidation-reduction process, selenium compound metabolic process                                                                                                                                                                                                  | 66.73             | 90.40  | 90.40  |
| ACDH5                 | ethanol oxidation, formaldehyde catabolic process, oxidation-reduction process, peptidyl-cysteine S-nitrosylation, retinol metabolic process                                                                                                                                                                            | 32.29             | 66.73  | 66.73  |
| COMT                  | catecholamine metabolic process, dopamine catabolic process, estrogen metabolic process, methylation, neurotransmitter catabolic process                                                                                                                                                                                | 34.44             | 27.98  | 27.98  |
| NME2                  | GTP biosynthetic process, GTP biosynthetic process, UTP biosynthetic process, nucleobase-containing small molecule interconversion, nucleoside diphosphate phosphorylation, nucleoside triphosphate biosynthetic process, nucleotide metabolic process, peptidyl-histidine pho                                          | 36.59             | 38.74  | 38.74  |
| PLD3                  | oxidation-reduction process                                                                                                                                                                                                                                                                                             | 47.35             | 36.74  | 36.74  |
| PSMA4                 | MAPK cascade, anaphase-promoting complex-dependent catabolic process, proteasome-mediated ubiquitin-dependent protein catabolic process, protein polyubiquitination, proteolysis involved in cellular protein catabolic process                                                                                         | 38.74             | 8.61   | 8.61   |
| C10BP                 | RNA splicing, blood coagulation, intrinsic pathway, complement activation, classical pathway, mRNA processing, transcription, DNA-templated                                                                                                                                                                             | 25.83             | 51.66  | 51.66  |
| SPPT1                 | UDP-N-acetylglucosamine biosynthetic process, carboxylate derivative biosynthetic process, carbohydrate metabolic process, energy reserve metabolic process, fructose 6-phosphate metabolic process, glutamine metabolic process                                                                                        | 22.60             | 45.20  | 45.20  |
| SEI1                  | generation of precursor metabolites and energy, glycogen biosynthetic process                                                                                                                                                                                                                                           | 22.60             | 55.96  | 55.96  |
| EFG1                  | nuclear-transcribed mRNA catabolic process, nonsense-mediated decay, nuclear-transcribed mRNA poly(A) tail shortening, translation, translational initiation                                                                                                                                                            | 17.22             | 75.34  | 75.34  |
| RAB5C                 | receptor internalization involved in canonical Wnt signaling pathway, viral RNA genome replication                                                                                                                                                                                                                      | 43.90             | 77.49  | 77.49  |
| PCDH                  | UDP-N-acetylglucosamine biosynthetic process, carbohydrate metabolic process, gluconeogenesis metabolic process, glucose 1-phosphate metabolic process, protein-N-linked glycosylation, protein-O-linked glycosylation                                                                                                  | 36.59             | 32.29  | 32.29  |
| CNDP2                 | glutathione biosynthetic process, peptide catabolic process, proteolysis, sulfur amino acid metabolic process                                                                                                                                                                                                           | 21.52             | 49.51  | 49.51  |
| DOXK3                 | RNA secondary structure unwinding, transcription, DNA-templated, translational initiation                                                                                                                                                                                                                               | 23.68             | 19.27  | 19.27  |
| ECHE1                 | fatty acid-beta-oxidation, fatty acid metabolic process, lipid metabolic process                                                                                                                                                                                                                                        | 21.52             | 62.42  | 62.42  |
| FDPS                  | cholesterol biosynthetic process, farnesyl diphosphate biosynthetic process, geranyl diphosphate biosynthetic process, isoprenoid biosynthetic process, lipid metabolic process, sterol biosynthetic process, sterol biosynthetic process                                                                               | 8.61              | 30.13  | 30.13  |
| CYBER3                | L-ascorbic acid metabolic process, cholesterol biosynthetic process, lipid metabolic process, oxidation-reduction process, steroid biosynthetic process, sterol biosynthetic process                                                                                                                                    | 48.96             | 86.10  | 86.10  |
| PAH2B2                | 1'-phosphoadenosine 5'-phosphatidylate biosynthetic process, phosphorylation, sulfate assimilation                                                                                                                                                                                                                      | 32.29             | 27.98  | 27.98  |
| RAN                   | DNA metabolic process                                                                                                                                                                                                                                                                                                   | 25.83             | 43.09  | 43.09  |
| RPL4                  | nuclear-transcribed mRNA catabolic process, nonsense-mediated decay, rRNA processing, translation, translational initiation, viral transcription                                                                                                                                                                        | 38.74             | 38.74  | 38.74  |
| MTFPE1                | folic acid metabolic process, folic acid-containing compound biosynthetic process, folic acid-containing compound metabolic process, formate metabolic process, one-carbon metabolic process, oxidation-reduction process, tetrahydrofolate interconversion, tetrahydrofolate metabolic proce                           | 19.27             | 38.74  | 38.74  |
| HADHB                 | cardiolipin acyl-chain remodeling, fatty acid-beta-oxidation, fatty acid metabolic process, lipid metabolic process                                                                                                                                                                                                     | 27.98             | 49.51  | 49.51  |
| EEF1D                 | mRNA transcription, transcription, DNA-templated, translation, translational elongation                                                                                                                                                                                                                                 | 34.44             | 51.66  | 51.66  |
| PI                    | translate metabolic process, malate metabolic process, tricarboxylic acid cycle                                                                                                                                                                                                                                         | 32.29             | 23.68  | 23.68  |
| RP41                  | diphosphate metabolic process, phosphate-containing compound metabolic process, RNA aminoacylation for protein translation                                                                                                                                                                                              | 27.98             | 27.98  | 27.98  |
| RPL5                  | nuclear-transcribed mRNA catabolic process, nonsense-mediated decay, rRNA processing, translation, translational initiation, viral transcription                                                                                                                                                                        | 30.13             | 34.44  | 34.44  |
| RPB2                  | nuclear-transcribed mRNA catabolic process, nonsense-mediated decay, rRNA processing, translation, translational initiation, viral transcription                                                                                                                                                                        | 23.68             | 36.59  | 36.59  |
| COL1A1                | collagen catabolic process, peptide cross-linking                                                                                                                                                                                                                                                                       | 21.52             | 60.27  | 60.27  |
| PRKCSH                | N-glycan processing                                                                                                                                                                                                                                                                                                     | 30.13             | 34.44  | 34.44  |
| MRCC2                 | collagen catabolic process                                                                                                                                                                                                                                                                                              | 40.90             | 23.68  | 23.68  |
| PMEE2                 | MAPK cascade, anaphase-promoting complex-dependent catabolic process, protein polyubiquitination                                                                                                                                                                                                                        | 12.91             | 34.44  | 34.44  |

<sup>1</sup>Exponentially Modified Protein Abundance Index ([http://www.matrixscience.com/help/pquant\\_empa1\\_help.html](http://www.matrixscience.com/help/pquant_empa1_help.html)).



Table S7. Cont'd

| UniProt/Swiss-Prot<br>Accession ID | Biological Process                                                                                                                                                                                                                                                                                                               | enrichment<br>p-value | enrichment<br>q-value |
|------------------------------------|----------------------------------------------------------------------------------------------------------------------------------------------------------------------------------------------------------------------------------------------------------------------------------------------------------------------------------|-----------------------|-----------------------|
| ATC                                | de novo IMP biosynthetic process, cubitamine metabolic process, dithyrosine metabolic process, nucleoside metabolic process, purine ribonucleoside homopolymer biosynthetic process, ribonucleoside metabolic process, tetrahydrofolate biosynthetic process                                                                     | 19.27                 | 24.59                 |
| RPB5                               | nuclear-transcribed mRNA catabolic process, nonsense-mediated decay, RNA processing, translation, translational initiation, viral transcription                                                                                                                                                                                  | 16.81                 | 23.88                 |
| ACAT2                              | fatty acid beta-oxidation, lipid metabolic process, metabolic process                                                                                                                                                                                                                                                            | 17.74                 | 21.82                 |
| TS11                               | mRNA processing, mRNA splicing, via spliceosome, transcription from RNA polymerase I promoter                                                                                                                                                                                                                                    | 17.23                 | 23.53                 |
| AKR1B1                             | C21 steroid hormone biosynthetic process, carbohydrate metabolic process, daunoside metabolic process, deoxorubicin metabolic process, fructose biosynthetic process, monosaccharide metabolic process, naphthene metabolic process, norepinephrine metabolic process, oxidation-reductase activity                              | 16.81                 | 25.83                 |
| QL5                                | cellular amino acid biosynthetic process, glutamate biosynthetic process, glutamine catabolic process                                                                                                                                                                                                                            | 6.54                  | 36.89                 |
| PCBP2                              | RNA-dependent viral translational initiation, gene expression, mRNA metabolic process, mRNA splicing, via spliceosome, proteasome-mediated ubiquitin-dependent protein catabolic process, viral RNA genome replication                                                                                                           | 16.87                 | 27.98                 |
| RPB8                               | maturation of SSU-rRNA from trichloric RNA transcript (SSU-rRNA, 5.8S rRNA, LSU-rRNA), nuclear-transcribed mRNA catabolic process, nonsense-mediated decay, translation, translational initiation, viral transcription                                                                                                           | 14.94                 | 27.88                 |
| SCN11                              | proteolysis                                                                                                                                                                                                                                                                                                                      | 14.94                 | 27.88                 |
| SDS                                | RNA-dependent viral translational initiation, RNA processing, histone mRNA metabolic process, RNA modification                                                                                                                                                                                                                   | 16.88                 | 12.91                 |
| PBM4                               | MAPK cascade, anaphase-promoting complex-dependent catabolic process, proteasome-mediated ubiquitin-dependent protein catabolic process, protein polyubiquitination, proteolysis, ubiquitin-dependent ERAD pathway                                                                                                               | 15.87                 | 25.83                 |
| RPB15                              | nuclear-transcribed mRNA catabolic process, nonsense-mediated decay, RNA processing, translation, translational initiation, viral transcription                                                                                                                                                                                  | 16.88                 | 19.37                 |
| RPB4                               | nuclear-transcribed mRNA catabolic process, nonsense-mediated decay, RNA processing, translation, translational initiation, viral transcription                                                                                                                                                                                  | 16.87                 | 27.98                 |
| LAP1                               | UDP-N-acetylglucosamine biosynthetic process                                                                                                                                                                                                                                                                                     | 14.91                 | 17.22                 |
| ITD4V                              | ERK1 and ERK2 cascade                                                                                                                                                                                                                                                                                                            | 3.74                  | 43.95                 |
| EPF2                               | formation of translation preinitiation complex, nuclear-transcribed mRNA catabolic process, nonsense-mediated decay, translation                                                                                                                                                                                                 | 21.48                 | 16.78                 |
| SDN1                               | transcription, DNA-templated                                                                                                                                                                                                                                                                                                     | 16.81                 | 19.37                 |
| EPF21                              | protein autophosphorylation, translation, translational initiation, xenophagy                                                                                                                                                                                                                                                    | 19.27                 | 34.44                 |
| EPF4                               | cytoplasmic translation, formation of translation preinitiation complex, translation                                                                                                                                                                                                                                             | 14.94                 | 21.82                 |
| PABPC4                             | RNA catabolic process, mRNA polyadenylation, mRNA processing, mRNA splicing, via spliceosome, nuclear-transcribed mRNA catabolic process, nonsense-mediated decay, nuclear-transcribed mRNA poly(A) tail shortening, translation, translational initiation                                                                       | 17.74                 | 23.53                 |
| PABPC1                             | mRNA polyadenylation, mRNA processing, mRNA splicing, via spliceosome, nuclear-transcribed mRNA catabolic process, nonsense-mediated decay, nuclear-transcribed mRNA poly(A) tail shortening, translational initiation                                                                                                           | 17.74                 | 23.88                 |
| PBM7                               | MAPK cascade, anaphase-promoting complex-dependent catabolic process, proteasome-mediated ubiquitin-dependent protein catabolic process, protein polyubiquitination, proteolysis, proteolysis involved in cellular protein catabolic process, ubiquitin-dependent protein catabolic process                                      | 14.94                 | 19.37                 |
| RP13                               | nuclear-transcribed mRNA catabolic process, nonsense-mediated decay, RNA processing, translation, translational initiation, viral transcription                                                                                                                                                                                  | 14.94                 | 27.98                 |
| YARS                               | RNA aminoacylation for protein translation, translation, tyrosyl-tRNA aminoacylation, valyl-tRNA aminoacylation                                                                                                                                                                                                                  | 19.27                 | 32.29                 |
| HSD17B4                            | alpha-ketoglutarate metabolic process, androgen metabolic process, bile acid biosynthetic process, estrone metabolic process, fatty acid beta-oxidation, fatty acid beta-oxidation involving acyl-CoA oxidase, medium-chain fatty-acyl-CoA metabolic process, oxidation-reduction process, very long-chain fatty acid metabolism | 6.54                  | 32.29                 |
| SDC4                               | 4-hydroxyproline metabolic process, cellular protein modification process, oxidation-reduction process, protein maturation by protein folding                                                                                                                                                                                    | 17.74                 | 12.91                 |
| PBM3                               | MAPK cascade, anaphase-promoting complex-dependent catabolic process, proteasome-mediated ubiquitin-dependent protein catabolic process, protein polyubiquitination, ubiquitin-dependent protein catabolic process                                                                                                               | 14.94                 | 36.89                 |
| LAP3                               | protein metabolic process, proteolysis                                                                                                                                                                                                                                                                                           | 11.21                 | 27.98                 |
| MTN1                               | catecholamine metabolic process                                                                                                                                                                                                                                                                                                  | 16.88                 | 16.78                 |
| ALDH1A1                            | L-proline biosynthetic process, cellular amino acid biosynthetic process, citrulline biosynthetic process, glutamate metabolic process, ornithine biosynthetic process, oxidation-reduction process, phosphorylation                                                                                                             | 13.87                 | 21.82                 |
| RAO23B                             | global genome nucleotide-excision repair, nucleotide-excision repair, DNA damage recognition, nucleotide-excision repair, DNA duplex unwinding, nucleotide-excision repair, preincision complex assembly, proteasome-mediated ubiquitin-dependent protein catabolic process                                                      | 12.14                 | 23.88                 |
| NARS                               | carbamate biosynthetic process, homopolymer biosynthetic process                                                                                                                                                                                                                                                                 | 14.91                 | 25.83                 |
| UBR3L3                             | cellular protein modification process, protein K11-linked ubiquitination, protein polyubiquitination, protein ubiquitination, transcription, DNA-templated, ubiquitin-dependent protein catabolic process                                                                                                                        | 15.88                 | 17.22                 |
| EPF3                               | formation of translation preinitiation complex, translation                                                                                                                                                                                                                                                                      | 6.54                  | 36.13                 |
| BLCC                               | protein ubiquitination involved in ubiquitin-dependent protein catabolic process, transcription elongation from RNA polymerase II promoter, transcription from RNA polymerase II promoter, transcription, DNA-templated, ubiquitin-dependent protein catabolic process                                                           | 14.91                 | 25.83                 |
| LT4H                               | leukotriene biosynthetic process, leukotriene metabolic process, peptide catabolic process, proteolysis                                                                                                                                                                                                                          | 6.40                  | 27.98                 |
| PBM8                               | MAPK cascade, anaphase-promoting complex-dependent catabolic process, protein polyubiquitination, proteolysis involved in cellular protein catabolic process                                                                                                                                                                     | 11.21                 | 23.88                 |
| RA7B1                              | supernumerary factor catabolic process, lipid catabolic process, lipid metabolic process, lipophagy                                                                                                                                                                                                                              | 14.94                 | 27.98                 |
| RPB10                              | nuclear-transcribed mRNA catabolic process, nonsense-mediated decay, RNA processing, translation, translational initiation, viral transcription                                                                                                                                                                                  | 14.94                 | 16.78                 |
| STRAP                              | RNA splicing, mRNA processing, spliceosomal snRNP assembly                                                                                                                                                                                                                                                                       | 6.40                  | 36.13                 |
| CBR1                               | cytochrome P-450 metabolic process, drug metabolic process, oxidation-reduction process, phytylquinone catabolic process, vitamin K metabolic process                                                                                                                                                                            | 4.87                  | 36.74                 |
| CBR3                               | oxidation-reduction process, phytylquinone catabolic process                                                                                                                                                                                                                                                                     | 3.74                  | 12.91                 |
| SLC3A2                             | carbohydrate metabolic process                                                                                                                                                                                                                                                                                                   | 1.87                  | 43.95                 |
| ETP1                               | nuclear-transcribed mRNA catabolic process, nonsense-mediated decay, protein methylation, translational termination                                                                                                                                                                                                              | 12.14                 | 15.87                 |
| PSPF9                              | protein peptidyl-prolyl isomerization                                                                                                                                                                                                                                                                                            | 6.80                  | 36.89                 |
| GOI1                               | oxidation-reduction process                                                                                                                                                                                                                                                                                                      | 28.95                 | 55.94                 |
| EPF23                              | formation of translation preinitiation complex, translation                                                                                                                                                                                                                                                                      | 4.87                  | 36.74                 |
| PRKACA                             | lipopeptide metabolic process, mRNA processing, peptidyl-serine phosphorylation, peptidyl-threonine phosphorylation, phosphorylation, protein autophosphorylation                                                                                                                                                                | 6.40                  | 19.37                 |
| PRKACB                             | lipopeptide metabolic process, phosphorylation, protein phosphorylation                                                                                                                                                                                                                                                          | 6.40                  | 16.78                 |
| PBM2                               | MAPK cascade, anaphase-promoting complex-dependent catabolic process, proteasome-mediated ubiquitin-dependent protein catabolic process, protein polyubiquitination, proteolysis, proteolysis involved in cellular protein catabolic process                                                                                     | 15.87                 | 16.78                 |
| DRNR1A1                            | RNA splicing, gene expression, mRNA processing, mRNA splicing, via spliceosome                                                                                                                                                                                                                                                   | 13.87                 | 12.91                 |
| RARS                               | arginyl-tRNA aminoacylation, tRNA aminoacylation for protein translation, translation                                                                                                                                                                                                                                            | 6.54                  | 36.89                 |
| TARS                               | tRNA aminoacylation for protein translation, tRNA aminoacylation, translation                                                                                                                                                                                                                                                    | 6.54                  | 27.98                 |
| UREY1                              | DNA double-strand break processing, double-strand break repair via nonhomologous end joining, error-free postreplicative DNA repair, global genome nucleotide-excision repair, postreplicative repair, protein K3-linked ubiquitination                                                                                          | 6.54                  | 19.37                 |
| UREY2                              | DNA double-strand break processing, double-strand break repair via nonhomologous end joining, error-free postreplicative DNA repair, global genome nucleotide-excision repair, protein K3-linked ubiquitination                                                                                                                  | 6.54                  | 27.98                 |
| RN11                               | purine ribonucleotide catabolic process, transcription, DNA-templated                                                                                                                                                                                                                                                            | 7.47                  | 19.37                 |
| ALDH1A1                            | carbamate biosynthetic process, cellular amino acid biosynthetic process, hormone metabolic process, neurotransmitter biosynthetic process, oxidation-reduction process                                                                                                                                                          | 16.88                 | 16.78                 |
| SLU11                              | cellular amino acid biosynthetic process, glutamate biosynthetic process, glutamate catabolic process, glutamine metabolic process, oxidation-reduction process, tricarboxylic acid metabolic process                                                                                                                            | 16.88                 | 4.31                  |
| DNK3                               | RNA processing, mRNA splicing, via spliceosome                                                                                                                                                                                                                                                                                   | 6.40                  | 27.88                 |
| EPF26                              | formation of translation preinitiation complex, translation                                                                                                                                                                                                                                                                      | 16.87                 | 19.37                 |
| PUB1A                              | amyloid fibril formation, protein maturation by protein folding, protein peptidyl-prolyl isomerization                                                                                                                                                                                                                           | 19.27                 | 21.82                 |
| RPB8                               | cytoplasmic translation, nuclear-transcribed mRNA catabolic process, nonsense-mediated decay, RNA processing, translation, translational initiation, viral transcription                                                                                                                                                         | 9.34                  | 21.82                 |
| RP17                               | cytoplasmic translation, maturation of LSU-rRNA from trichloric RNA transcript (SSU-rRNA, 5.8S rRNA, LSU-rRNA), nuclear-transcribed mRNA catabolic process, nonsense-mediated decay, translation, translational initiation, viral transcription                                                                                  | 7.47                  | 17.22                 |
| NARS                               | histidyl-tRNA aminoacylation, mitochondrial translation                                                                                                                                                                                                                                                                          | 11.21                 | 21.82                 |
| LARS                               | leucyl-tRNA aminoacylation, translation                                                                                                                                                                                                                                                                                          | 6.40                  | 25.83                 |
| NARS                               | asparaginyl-tRNA aminoacylation, tRNA aminoacylation for protein translation, translation                                                                                                                                                                                                                                        | 6.54                  | 27.88                 |
| SRP14                              | protein deubiquitination, ubiquitin-dependent protein catabolic process                                                                                                                                                                                                                                                          | 13.87                 | 12.91                 |
| CARS                               | carbamyl-tRNA aminoacylation, translation                                                                                                                                                                                                                                                                                        | 3.74                  | 34.44                 |
| RP129                              | cytoplasmic translation, nuclear-transcribed mRNA catabolic process, nonsense-mediated decay, RNA processing, translation, translational initiation, viral transcription                                                                                                                                                         | 7.47                  | 27.98                 |
| PBM73                              | DNA-templated transcription, termination, covalent chromatin modification, histone H4 H3 methylation, methylation, peptidyl-arginine methylation, peptidyl-arginine methylation, to symmetrical dimethyl arginine, spliceosomal snRNP assembly, transcription, DNA-templated                                                     | 12.14                 | 12.91                 |
| DOX1                               | RNA secondary structure unwinding, double-strand break repair, mRNA processing, nucleic acid phosphodiester bond hydrolysis, spliceosomal complex assembly, RNA processing, RNA splicing, via endonucleolytic cleavage and ligation, transcription, DNA-templated                                                                | 6.80                  | 32.29                 |
| SDP17                              | cytoplasmic translational termination, nuclear-transcribed mRNA catabolic process, nonsense-mediated decay, protein methylation, translation                                                                                                                                                                                     | 3.74                  | 17.22                 |
| SHR2                               | L-serine biosynthetic process, folic acid metabolic process, glycine biosynthetic process from serine, one-carbon metabolic process, protein K3-linked deubiquitination, tetrahydrofolate interconversion, tetrahydrofolate metabolic process                                                                                    | 19.27                 | 21.82                 |
| LAMP1                              | autophagy                                                                                                                                                                                                                                                                                                                        | 19.27                 | 17.22                 |
| PAK2                               | MAPK cascade, histone H2B-H4 phosphorylation, peptidyl-serine phosphorylation, phosphorylation, protein autophosphorylation                                                                                                                                                                                                      | 12.14                 | 16.78                 |
| PNL1                               | canonical glycolysis, carbohydrate metabolic process, fructose 1,6-bisphosphate metabolic process, fructose 6-phosphate metabolic process, glycolytic process, glycolytic process through fructose-6-phosphate, metabolic process, phosphorylation                                                                               | 13.87                 | 23.88                 |
| PBM3                               | MAPK cascade, anaphase-promoting complex-dependent catabolic process, protein polyubiquitination, ubiquitin-dependent ERAD pathway                                                                                                                                                                                               | 14.94                 | 36.89                 |
| NPEP5                              | peptide catabolic process, protein polyubiquitination, proteolysis                                                                                                                                                                                                                                                               | 13.87                 | 12.91                 |
| SRH                                | polyamine biosynthetic process, spermidine biosynthetic process                                                                                                                                                                                                                                                                  | 7.47                  | 27.98                 |
| QARS                               | glutamyl-tRNA aminoacylation, translation                                                                                                                                                                                                                                                                                        | 11.21                 | 16.78                 |
| SDHA                               | aerobic respiration, cellular respiration, mitochondrial electron transport, succinate to ubiquinone, oxidation-reduction process, respiratory electron transport chain, succinate metabolic process, tricarboxylic acid cycle                                                                                                   | 6.80                  | 19.37                 |
| PAP5                               | glucose metabolic process, phosphatidylcholine biosynthetic process, triglyceride catabolic process                                                                                                                                                                                                                              | 16.87                 | 12.91                 |
| PBM45                              | MAPK cascade, RNA phosphodiester bond hydrolysis, anaphase-promoting complex-dependent catabolic process, proteasome-mediated ubiquitin-dependent protein catabolic process, protein polyubiquitination, proteolysis involved in cellular protein catabolic process                                                              | 6.93                  | 36.74                 |
| GO11                               | 2-oxoglutarate metabolic process, aspartate biosynthetic process, aspartate catabolic process, biosynthetic process, cellular amino acid biosynthetic process, dicarboxylic acid metabolic process, gluconeogenesis, glutamate catabolic process to 2-oxoglutarate, glutamate catabolic process to aspartate, glutamate          | 4.87                  | 32.29                 |
| OS                                 | carbohydrate metabolic process, tricarboxylic acid cycle                                                                                                                                                                                                                                                                         | 17.74                 | 4.31                  |
| COL1A1                             | collagen biosynthetic process, collagen catabolic process, integrin biosynthetic process                                                                                                                                                                                                                                         | 3.74                  | 34.44                 |
| REXB                               | carbohydrate metabolic process, cellular protein metabolic process, chondroitin sulfate catabolic process, ganglioside catabolic process, glycosaminoglycan metabolic process, glycosphingolipid metabolic process, hyaluronan catabolic process, keratan sulfate catabolic process, oligosaccharide catabolic process           | 9.34                  | 17.22                 |
| HNRNH8                             | alternative mRNA splicing, via spliceosome, gene expression, mRNA processing, mRNA splicing, via spliceosome                                                                                                                                                                                                                     | 9.34                  | 21.82                 |
| EPF8                               | translation, translational initiation                                                                                                                                                                                                                                                                                            | 11.21                 | 16.78                 |
| PAPF1B2                            | lipid catabolic process                                                                                                                                                                                                                                                                                                          | 14.91                 | 12.91                 |
| PBM14                              | MAPK cascade, anaphase-promoting complex-dependent catabolic process, double-strand break repair via homologous recombination, double-strand break repair via nonhomologous end joining, proteasome-mediated ubiquitin-dependent protein catabolic process, protein K3-linked deubiquitination                                   | 12.14                 | 16.78                 |
| RP13                               | cytoplasmic translation, nuclear-transcribed mRNA catabolic process, nonsense-mediated decay, RNA processing, translation, translational initiation, viral transcription                                                                                                                                                         | 19.27                 | 19.37                 |
| ANCY                               | S-adenosylhomocysteine catabolic process, S-adenosylmethionine cycle, homocysteine biosynthetic process, methylation, one-carbon metabolic process                                                                                                                                                                               | 12.14                 | 19.37                 |
| SET                                | DNA replication                                                                                                                                                                                                                                                                                                                  | 11.21                 | 12.91                 |
| PBM88                              | MAPK cascade, anaphase-promoting complex-dependent catabolic process, protein polyubiquitination, proteolysis, proteolysis involved in cellular protein catabolic process                                                                                                                                                        | 6.40                  | 27.98                 |
| DNK2                               | 2-oxoglutarate metabolic process, carbohydrate metabolic process, glyoxylate cycle, isocitrate metabolic process, oxidation-reduction process, tricarboxylic acid cycle                                                                                                                                                          | 6.40                  | 21.82                 |
| PICALM                             | positive regulation of aspartic-type endopeptidase activity involved in amyloid precursor protein catabolic process, receptor internalization                                                                                                                                                                                    | 6.80                  | 23.88                 |
| ALDH1A1                            | cellular amino acid metabolic process, choline catabolic process, glycine betaine biosynthetic process from choline, lysine catabolic process, metabolic process, oxidation-reduction process                                                                                                                                    | 16.88                 | 16.13                 |
| ASNS                               | L-asparagine biosynthetic process, asparagine biosynthetic process, cellular amino acid biosynthetic process, glutamine metabolic process                                                                                                                                                                                        | 6.93                  | 36.89                 |
| QAT                                | L-proline biosynthetic process, arginine catabolic process to glutamate, arginine catabolic process to proline via ornithine, cellular amino acid biosynthetic process                                                                                                                                                           | 4.87                  | 36.13                 |

\*Experimentally Modified Protein Abundance Index (<http://www.matrixscience.com/help/help.html>).

Table S7. Cont 3

| UniProt/Swiss-Prot ID | Biological Process                                                                                                                                                                                                                                                                                                     | enrP47 | enrP47 |
|-----------------------|------------------------------------------------------------------------------------------------------------------------------------------------------------------------------------------------------------------------------------------------------------------------------------------------------------------------|--------|--------|
| Accession ID          | Biological regulation                                                                                                                                                                                                                                                                                                  | CDM    | OMEB   |
| P0871                 | galactose catabolic process, gluconeogenesis, glycogen biosynthetic process, glycogen catabolic process, glycolytic process, organic substance metabolic process                                                                                                                                                       | 6.54   | 27.83  |
| P0872                 | transcription, DNA-templated                                                                                                                                                                                                                                                                                           | 9.34   | 18.37  |
| P08A2                 | MAPK cascade, anaphase-promoting complex-dependent catabolic process, proteasome-mediated ubiquitin-dependent protein catabolic process, protein polyubiquitination, proteolysis involved in cellular protein catabolic process                                                                                        | 14.94  | 8.61   |
| P08B4                 | MAPK cascade, anaphase-promoting complex-dependent catabolic process, proteasome-mediated ubiquitin-dependent protein catabolic process, protein polyubiquitination, proteolysis involved in cellular protein catabolic process                                                                                        | 7.47   | 17.22  |
| P08D13                | MAPK cascade, anaphase-promoting complex-dependent catabolic process, proteasome-mediated ubiquitin-dependent protein catabolic process, protein polyubiquitination, ubiquitin-dependent protein catabolic process                                                                                                     | 13.07  | 12.91  |
| P08C5                 | de novo IMP biosynthetic process, adenine biosynthetic process, purine ribonucleoside monophosphate biosynthetic process                                                                                                                                                                                               | 8.40   | 21.82  |
| C4LD                  | de novo IMP biosynthetic process, de novo pyrimidine nucleoside biosynthetic process, GTP biosynthetic process, arginine biosynthetic process, creatinine biosynthetic process, drug metabolic process, glutamine metabolic process, nitrogen compound metabolic process                                               | 8.40   | 21.82  |
| RPL11                 | nuclear-transcribed mRNA catabolic process, nonsense-mediated decay, rRNA processing, translation, translational initiation, viral transcription                                                                                                                                                                       | 8.40   | 18.37  |
| UBR4                  | protein ubiquitination, protein ubiquitination involved in ubiquitin-dependent protein catabolic process                                                                                                                                                                                                               | 7.47   | 17.22  |
| P08C2                 | MAPK cascade, anaphase-promoting complex-dependent catabolic process, protein polyubiquitination, ubiquitin-dependent ERAD pathway                                                                                                                                                                                     | 9.34   | 18.37  |
| APRT                  | AMP salvage, adenine metabolic process, adenine salvage, nucleoside metabolic process                                                                                                                                                                                                                                  | 10.27  | 16.76  |
| CD-C42                | protein ubiquitination, viral RNA genome replication                                                                                                                                                                                                                                                                   | 10.27  | 17.22  |
| TUFR                  | mitochondrial translational elongation, translation, translational elongation                                                                                                                                                                                                                                          | 10.27  | 12.91  |
| WMP14                 | collagen catabolic process, protein processing, proteolysis, zymogen activation                                                                                                                                                                                                                                        | 0.93   | 14.44  |
| OLA1                  | ATP metabolic process                                                                                                                                                                                                                                                                                                  | 10.27  | 12.91  |
| PYP2CA                | RNA splicing, caramide metabolic process, nuclear-transcribed mRNA catabolic process, nonsense-mediated decay, protein dephosphorylation                                                                                                                                                                               | 4.87   | 13.91  |
| RPL16                 | cytoplasmic translation, nuclear-transcribed mRNA catabolic process, nonsense-mediated decay, rRNA processing, translation, translational initiation, viral transcription                                                                                                                                              | 8.40   | 17.22  |
| EH01                  | receptor recycling                                                                                                                                                                                                                                                                                                     | 5.80   | 27.86  |
| INR0DRL3              | oxidation-reduction process                                                                                                                                                                                                                                                                                            | 10.27  | 8.40   |
| DPN4                  | proteolysis                                                                                                                                                                                                                                                                                                            | 0.93   | 16.69  |
| CD-C37                | peptidyl-tyrosine phosphorylation                                                                                                                                                                                                                                                                                      | 4.87   | 21.82  |
| CPNE1                 | glycerophospholipid biosynthetic process, lipid metabolic process, proteolysis, transcription, DNA-templated                                                                                                                                                                                                           | 12.94  | 16.76  |
| DPN3                  | proteolysis                                                                                                                                                                                                                                                                                                            | 14.91  | 6.48   |
| KHSRP                 | RNA splicing, via transsplicing reactions, mRNA catabolic process, mRNA processing, transcription, DNA-templated                                                                                                                                                                                                       | 6.54   | 16.76  |
| IBH9P                 | starkeyic acid metabolic process, glyoxylate metabolic process, oxidation-reduction process                                                                                                                                                                                                                            | 7.47   | 17.22  |
| WDRN7                 | gene expression, mRNA processing, mRNA splicing, via spliceosome                                                                                                                                                                                                                                                       | 5.80   | 12.94  |
| PAFAH1B1              | lipid catabolic process, platelet activating factor metabolic process                                                                                                                                                                                                                                                  | 9.34   | 12.91  |
| PHB                   | DNA biosynthetic process, histone deacetylation                                                                                                                                                                                                                                                                        | 9.34   | 12.91  |
| PNP                   | NAD biosynthesis via nicotinamide ribotide salvage pathway, inosine catabolic process, nicotinamide riboside catabolic process, purine nucleoside metabolic process, purine nucleotide catabolic process, purine-containing compound salvage, urate biosynthetic process                                               | 5.80   | 21.82  |
| P08C3                 | MAPK cascade, anaphase-promoting complex-dependent catabolic process, protein polyubiquitination, transcription from RNA polymerase II promoter, ubiquitin-dependent ERAD pathway                                                                                                                                      | 7.47   | 17.22  |
| P08B3                 | MAPK cascade, anaphase-promoting complex-dependent catabolic process, proteasome-mediated ubiquitin-dependent protein catabolic process, protein polyubiquitination, proteolysis involved in cellular protein catabolic process                                                                                        | 8.40   | 17.22  |
| P08B1                 | histidine metabolic process, oxidation-reduction process, prostaglandin metabolic process                                                                                                                                                                                                                              | 10.27  | 16.76  |
| RPL17                 | nuclear-transcribed mRNA catabolic process, nonsense-mediated decay, rRNA processing, translation, translational initiation, viral transcription                                                                                                                                                                       | 8.40   | 18.37  |
| KAR3                  | disubstituted triphosphatase biosynthetic process, tryptophan biosynthetic process, RNA processing, translation                                                                                                                                                                                                        | 10.27  | 12.91  |
| RPL17                 | nuclear-transcribed mRNA catabolic process, nonsense-mediated decay, rRNA processing, translation, translational initiation, viral transcription                                                                                                                                                                       | 10.27  | 12.91  |
| EF3M                  | cytoplasmic translation initiation, formation of translation preinitiation complex, translation                                                                                                                                                                                                                        | 6.54   | 17.22  |
| EF3M                  | formation of translation preinitiation complex, translation, viral translational termination-reinitiation                                                                                                                                                                                                              | 6.54   | 16.76  |
| CCSC47                | ubiquitin-dependent ERAD pathway                                                                                                                                                                                                                                                                                       | 5.80   | 12.91  |
| UBE2N                 | DNA double-strand break processing, double-strand break repair via homologous recombination, double-strand break repair via nonhomologous end joining, global genome nucleotide excision repair, histone ubiquitination, postreplication repair, protein K63-linked ubiquitination, proteolysis                        | 9.34   | 16.76  |
| ALDH1                 | carbohydrate metabolic process, ethanol catabolic process, ethanol oxidation, oxidation-reduction process                                                                                                                                                                                                              | 13.07  | 4.31   |
| SLURA                 | homeostatic process, oxidation-reduction process                                                                                                                                                                                                                                                                       | 11.21  | 6.48   |
| EF3F                  | RES-dependent viral translational initiation, formation of translation preinitiation complex, protein deubiquitination, translation                                                                                                                                                                                    | 10.27  | 12.91  |
| PHL2                  | transcription, DNA-templated                                                                                                                                                                                                                                                                                           | 3.74   | 23.88  |
| SEA                   | carbohydrate metabolic process, ceramide biosynthetic process, glycosylceramide catabolic process, glycosphingolipid metabolic process, sphingine biosynthetic process                                                                                                                                                 | 7.47   | 17.22  |
| SLRX3                 | oxidation-reduction process                                                                                                                                                                                                                                                                                            | 10.27  | 8.61   |
| SYNCRP                | RNA splicing, mRNA processing, mRNA splicing, via spliceosome                                                                                                                                                                                                                                                          | 3.74   | 17.22  |
| SLX                   | peptidyl-tyrosine phosphorylation, phosphorylation                                                                                                                                                                                                                                                                     | 12.94  | 16.76  |
| IMPCH2                | GMP biosynthetic process, GTP biosynthetic process, oxidation-reduction process, purine ribonucleoside monophosphate biosynthetic process                                                                                                                                                                              | 7.47   | 17.22  |
| BL01                  | carbohydrate metabolic process, glutathione metabolic process, methylglyoxal metabolic process, pyruvate metabolic process                                                                                                                                                                                             | 9.34   | 8.61   |
| NC05                  | oligosaccharide metabolic process, protein N-linked glycosylation                                                                                                                                                                                                                                                      | 12.94  | 16.76  |
| QPR1                  | NAD biosynthetic process, NAD metabolic process, quinolate catabolic process                                                                                                                                                                                                                                           | 11.21  | 2.18   |
| PCNA                  | DNA replication, error-free translesion synthesis, error-prone translesion synthesis, leading strand elongation, mismatch repair, mitotic telomere maintenance via semi-conservative replication, nucleotide-excision repair, DNA gap filling, nucleotide-excision repair, DNA incision, 5'-to-3' lesion               | 8.40   | 16.76  |
| PRP7                  | proteolysis                                                                                                                                                                                                                                                                                                            | 4.87   | 23.88  |
| P08B8                 | MAPK cascade, anaphase-promoting complex-dependent catabolic process, proteasome-mediated ubiquitin-dependent protein catabolic process, protein polyubiquitination, proteolysis involved in cellular protein catabolic process                                                                                        | 8.40   | 16.76  |
| P08D7                 | MAPK cascade, anaphase-promoting complex-dependent catabolic process, protein polyubiquitination                                                                                                                                                                                                                       | 4.87   | 18.37  |
| RPL18                 | nuclear-transcribed mRNA catabolic process, nonsense-mediated decay, rRNA processing, translation, translational initiation, viral transcription                                                                                                                                                                       | 10.27  | 27.86  |
| RPL9                  | mitochondrial translation, mitochondrial translational elongation, mitochondrial translation termination                                                                                                                                                                                                               | 6.54   | 17.22  |
| SMS                   | methionine metabolic process, spermine biosynthetic process, spermine metabolic process                                                                                                                                                                                                                                | 5.80   | 21.82  |
| TSPD                  | heme biosynthetic process, steroid biosynthetic process, steroid metabolic process                                                                                                                                                                                                                                     | 9.34   | 8.61   |
| RPL13                 | nuclear-transcribed mRNA catabolic process, nonsense-mediated decay, rRNA processing, translation, translational initiation, viral transcription                                                                                                                                                                       | 8.40   | 17.22  |
| ECM29                 | ubiquitin-dependent ERAD pathway                                                                                                                                                                                                                                                                                       | 6.54   | 12.91  |
| PLXN1                 | blood coagulation, fibrin clot formation                                                                                                                                                                                                                                                                               | 4.87   | 23.88  |
| PYP2CA                | dephosphorylation, protein dephosphorylation                                                                                                                                                                                                                                                                           | 1.87   | 17.22  |
| CR1AP                 | peptidyl-proline hydroxylation to 3-hydroxy-L-proline                                                                                                                                                                                                                                                                  | 9.34   | 12.91  |
| TNND1                 | transcription, DNA-templated                                                                                                                                                                                                                                                                                           | 4.87   | 21.82  |
| DT01                  | D-amino acid catabolic process, DNA replication, tRNA metabolic process                                                                                                                                                                                                                                                | 6.54   | 12.91  |
| GN5                   | glycosaminoglycan metabolic process, keratan sulfate catabolic process, metabolic process                                                                                                                                                                                                                              | 7.47   | 8.61   |
| PCXK                  | phosphorylation, pyridoxal 5'-phosphate salvage, vitamin B6 metabolic process                                                                                                                                                                                                                                          | 3.74   | 19.37  |
| SEA15                 | MAPK cascade                                                                                                                                                                                                                                                                                                           | 6.54   | 19.37  |
| PRDX2                 | hydrogen peroxide catabolic process, oxidation-reduction process, removal of superoxide radicals                                                                                                                                                                                                                       | 11.21  | 18.37  |
| P08B1                 | MAPK cascade, anaphase-promoting complex-dependent catabolic process, proteasome-mediated ubiquitin-dependent protein catabolic process, protein polyubiquitination, proteolysis involved in cellular protein catabolic process                                                                                        | 8.40   | 17.22  |
| TNND17                | oxidation-reduction process                                                                                                                                                                                                                                                                                            | 5.80   | 21.82  |
| USP5                  | protein K48-linked deubiquitination, proteolysis, ubiquitin-dependent protein catabolic process                                                                                                                                                                                                                        | 11.21  | 8.61   |
| RPL15A                | nuclear-transcribed mRNA catabolic process, nonsense-mediated decay, rRNA processing, translation, translational initiation, viral transcription                                                                                                                                                                       | 5.80   | 19.37  |
| MCT51                 | RES-dependent translational initiation, formation of translation preinitiation complex, transcription, DNA-templated, translation                                                                                                                                                                                      | 9.34   | 27.86  |
| P08B7                 | MAPK cascade, anaphase-promoting complex-dependent catabolic process, proteasome-mediated ubiquitin-dependent protein catabolic process, protein polyubiquitination, proteolysis, proteolysis involved in cellular protein catabolic process                                                                           | 9.34   | 12.91  |
| P08C3                 | MAPK cascade, anaphase-promoting complex-dependent catabolic process, proteasome-mediated ubiquitin-dependent protein catabolic process, protein catabolic process, protein polyubiquitination, ubiquitin-dependent ERAD pathway                                                                                       | 7.47   | 16.76  |
| PNC                   | protein deoxyribonucleic acid isomerization                                                                                                                                                                                                                                                                            | 10.27  | 8.61   |
| EF6                   | maturation of 5.8S rRNA, maturation of 18S rRNA, translation, translational initiation                                                                                                                                                                                                                                 | 7.47   | 16.76  |
| EF3A                  | RES-dependent viral translational initiation, formation of cytoplasmic translation initiation complex, formation of translation preinitiation complex, translation reinitiation, viral translational termination-reinitiation                                                                                          | 2.80   | 26.13  |
| PRP182A               | protein dephosphorylation                                                                                                                                                                                                                                                                                              | 5.80   | 16.76  |
| AMP2                  | tRNA aminoacylation for protein translation, translation                                                                                                                                                                                                                                                               | 8.40   | 12.91  |
| CYC5                  | cellular respiration, mitochondrial electron transport, cytochrome c to oxygen, mitochondrial electron transport, ubiquinol to cytochrome c, oxidation-reduction process, protein dephosphorylation                                                                                                                    | 12.94  | 4.31   |
| SDH1212               | nitrogen biosynthetic process, fatty acid biosynthetic process, lipid metabolic process, long-chain fatty acyl-CoA biosynthetic process, oxidation-reduction process, steroid biosynthetic process                                                                                                                     | 4.87   | 17.22  |
| GS5                   | cellular amino acid metabolic process, glutathione biosynthetic process                                                                                                                                                                                                                                                | 4.87   | 18.37  |
| HA0H                  | fatty acid beta-oxidation, lipid metabolic process, oxidation-reduction process                                                                                                                                                                                                                                        | 5.80   | 16.76  |
| WPI2                  | protein maturation                                                                                                                                                                                                                                                                                                     | 10.27  | 6.48   |
| MP0E8                 | cellular protein metabolic process                                                                                                                                                                                                                                                                                     | 4.87   | 17.22  |
| NACA                  | transcription, DNA-templated                                                                                                                                                                                                                                                                                           | 4.87   | 17.22  |
| N4DK                  | N-acetylglucosamine metabolic process, N-acetylglucosamine metabolic process, N-acetylglucosamine catabolic process, UDP-N-acetylglucosamine biosynthetic process, carbohydrate phosphorylation, phosphorylation                                                                                                       | 1.87   | 11.63  |
| OTUB1                 | DNA repair, protein K48-linked deubiquitination, protein deubiquitination                                                                                                                                                                                                                                              | 6.54   | 12.91  |
| PEPD                  | cellular amino acid metabolic process, collagen catabolic process, proteolysis                                                                                                                                                                                                                                         | 7.47   | 16.76  |
| CTSA                  | glycosphingolipid metabolic process, proteolysis involved in cellular protein catabolic process                                                                                                                                                                                                                        | 7.47   | 16.76  |
| DLD                   | 2-oxoglutarate metabolic process, branched-chain amino acid catabolic process, dihydrofolate metabolic process, glycylglycine metabolic process, lipote metabolic process, lysine catabolic process, mitochondrial acetyl-CoA biosynthetic process from pyruvate, mitochondrial electron transport, NADH to ubiquinone | 4.87   | 17.22  |
| RPL22                 | cytoplasmic translation, nuclear-transcribed mRNA catabolic process, nonsense-mediated decay, rRNA processing, translation, translational initiation, viral transcription                                                                                                                                              | 8.40   | 12.91  |
| ITAT2                 | transcription, DNA-templated                                                                                                                                                                                                                                                                                           | 7.47   | 6.48   |
| ALPH                  | activation of cysteine-type endopeptidase activity, oxidation-reduction process, peptidyl-amino acid modification                                                                                                                                                                                                      | 10.27  | 2.18   |
| ACB3                  | fatty acid biosynthetic process, lipid metabolic process, long-chain fatty acid metabolic process, long-chain fatty acyl-CoA biosynthetic process, metabolic process                                                                                                                                                   | 11.21  | 6.48   |
| APRX1                 | DNA demethylation, DNA recombination, RNA phospholipid transfer, bond hydrolysis, endonucleolytic, base-excision repair, base-excision repair, base-free superphosphate removal, nucleic acid phosphodiester bond hydrolysis, oxidation-reduction process, telomere maintenance, transcription, DNA-templated          | 12.94  | 2.18   |
| DCB1                  | UV-damage excision repair, global genome nucleotide-excision repair, histone H2A monoubiquitination, nucleotide-excision repair, DNA damage recognition, nucleotide-excision repair, DNA incision, 5'-to-3' lesion                                                                                                     | 4.87   | 17.22  |

\*Exponentially Modified Protein Abundance Index ([http://www.ma.utexas.edu/help/quant\\_enrP47\\_help.html](http://www.ma.utexas.edu/help/quant_enrP47_help.html))

Table S7. Cont'd

| UniProt/Swiss-Prot<br>Accession ID | Biological Process                                                                                                                                                                                                                                                                                                                                                                                                                                                   | GO     | OMIM   |
|------------------------------------|----------------------------------------------------------------------------------------------------------------------------------------------------------------------------------------------------------------------------------------------------------------------------------------------------------------------------------------------------------------------------------------------------------------------------------------------------------------------|--------|--------|
| GO                                 | muscle biosynthetic process                                                                                                                                                                                                                                                                                                                                                                                                                                          | 4,877  | 15,871 |
| EP3H                               | formation of translation preinitiation complex, translation, translational initiation                                                                                                                                                                                                                                                                                                                                                                                | 8,334  | 6,446  |
| EPDP1                              | 2'-phosphoadenosine 5'-phosphatidyltransferase metabolic process, generation of precursor metabolites and energy, nucleic acid phosphodiester bond hydrolysis, nucleoside triphosphate catabolic process, riboflavin metabolic process                                                                                                                                                                                                                               | 8,334  | 12,831 |
| PL2                                | transcription, DNA-templated                                                                                                                                                                                                                                                                                                                                                                                                                                         | 7,471  | 8,431  |
| GO1K1                              | glutathione derivative biosynthetic process, glutathione metabolic process, oxidation-reduction process                                                                                                                                                                                                                                                                                                                                                              | 8,334  | 15,871 |
| HS017010                           | branched-chain amino acid catabolic process, lipid metabolic process, mitochondrial RNA methylation, mitochondrial RNA processing, oxidation-reduction process, RNA processing                                                                                                                                                                                                                                                                                       | 7,471  | 15,774 |
| SE2A                               | carbohydrate metabolic process, cholesterol sulfate catabolic process, glycoside catabolic process, glycosaminoglycan biosynthetic process, glycosaminoglycan metabolic process, glycosylating lipid metabolic process, hyaluronan catabolic process, keratan sulfate catabolic process                                                                                                                                                                              | 8,334  | 12,831 |
| LMAA1                              | protein N-linked glycosylation via asparagine                                                                                                                                                                                                                                                                                                                                                                                                                        | 8,446  | 12,831 |
| PCR                                | carbinol metabolic process, cellular organophosphorus metabolic process, demethylation, fatty acid oxidation, flavonoid metabolic process, internal peptidyl-lysine acetylation, nitrate catabolic process, nitric oxide catabolic process, oxidation-reduction process, xenobiotic metabolic process                                                                                                                                                                | 8,334  | 8,446  |
| PCD2                               | hydrogen peroxide catabolic process, oxidation-reduction process, peptidyl-cysteine oxidation                                                                                                                                                                                                                                                                                                                                                                        | 7,471  | 12,831 |
| PRP91                              | 5-phosphoribose 1-diphosphate biosynthetic process, AMP biosynthetic process, cellular biosynthetic process, hypoxanthine biosynthetic process, nucleoside metabolic process, nucleoside biosynthetic process, phosphorylation, purine nucleobase metabolic process, pyrimidine nucleoside biosynthetic process, RNA processing                                                                                                                                      | 2,889  | 17,222 |
| PSMD4                              | MAPK cascade, anaphase-promoting complex-dependent catabolic process, proteasome-mediated ubiquitin-dependent protein catabolic process, protein polyubiquitination, ubiquitin-dependent protein catabolic process                                                                                                                                                                                                                                                   | 4,877  | 15,871 |
| GAAT                               | de novo AMP biosynthetic process, biosynthetic process, glycine metabolic process, purine nucleobase biosynthetic process, purine ribonucleoside monophosphate biosynthetic process, ribonucleoside monophosphate biosynthetic process, tetrahydrofolate biosynthetic process                                                                                                                                                                                        | 8,446  | 15,774 |
| SKP1                               | DCF-dependent proteasomal ubiquitin-dependent protein catabolic process, histone H2A monoubiquitination, proteasome-mediated ubiquitin-dependent protein catabolic process, protein polyubiquitination, protein ubiquitination, stress-activated MAPK cascade, ubiquitin-dependent protein catabolic process                                                                                                                                                         | 3,734  | 21,232 |
| DARS                               | peptidyl-RNA aminoacylation, translation                                                                                                                                                                                                                                                                                                                                                                                                                             | 2,889  | 22,846 |
| US2K                               | proteasome-mediated ubiquitin-dependent protein catabolic process, protein K48-linked ubiquitination                                                                                                                                                                                                                                                                                                                                                                 | 7,471  | 12,831 |
| CDB1                               | glutathione derivative biosynthetic process, glutathione metabolic process, oxidation-reduction process, xenobiotic metabolic process                                                                                                                                                                                                                                                                                                                                | 8,446  | 15,774 |
| PCP91                              | de novo CTP biosynthetic process, CTP biosynthetic process, glutamine metabolic process, nucleobase-containing small molecule interconversion, pyrimidine nucleoside biosynthetic process                                                                                                                                                                                                                                                                            | 7,471  | 12,831 |
| PLB2                               | lipid catabolic process, lipid metabolic process                                                                                                                                                                                                                                                                                                                                                                                                                     | 7,471  | 8,446  |
| RPL21                              | nuclear-transcribed mRNA catabolic process, nonsense-mediated decay, RNA processing, translation, translational initiation, viral transcription                                                                                                                                                                                                                                                                                                                      | 4,877  | 15,871 |
| PCOLCE                             | metabolism                                                                                                                                                                                                                                                                                                                                                                                                                                                           | 8,334  | 4,231  |
| APMAP                              | biosynthetic process                                                                                                                                                                                                                                                                                                                                                                                                                                                 | 7,471  | 8,446  |
| CPY1                               | glutathione metabolic process, hydrogen peroxide catabolic process, lipid metabolic process, lipoygenase pathway, oxidation-reduction process, protein oxidation, purine nucleoside catabolic process, triglyceride metabolic process                                                                                                                                                                                                                                | 3,734  | 12,831 |
| RPL19                              | nuclear-transcribed mRNA catabolic process, nonsense-mediated decay, RNA processing, translation, translational initiation, viral transcription                                                                                                                                                                                                                                                                                                                      | 7,471  | 15,774 |
| ODDH                               | 2-oxoglutarate metabolic process, NADH metabolic process, generation of precursor metabolites and energy, glycolytic process, glyoxylate metabolic process, lysine catabolic process, oxidation-reduction process, succinyl-CoA metabolic process, tricarboxylic acid cycle                                                                                                                                                                                          | 8,334  | 4,231  |
| TNINB1                             | proteasome-mediated ubiquitin-dependent protein catabolic process, transcription, DNA-templated                                                                                                                                                                                                                                                                                                                                                                      | 8,334  | 21,232 |
| AKR1A1                             | D-glucuronate catabolic process, L-ascorbate acid biosynthetic process, aldehyde metabolic process, cellular aldehyde metabolic process, glucose metabolic process, glucuronate catabolic process to xylulose 5-phosphate, glutathione derivative biosynthetic process, oxidant separate biosynthetic process, branched-chain amino acid biosynthetic process, branched-chain amino acid catabolic process, lysine biosynthetic process, valine biosynthetic process | 3,734  | 21,232 |
| BCAT1                              | aspartate biosynthetic process, branched-chain amino acid biosynthetic process, branched-chain amino acid catabolic process, lysine biosynthetic process, valine biosynthetic process                                                                                                                                                                                                                                                                                | 2,889  | 21,232 |
| CARM1                              | cellular lipid metabolic process, covalent chromatin modification, histone H3 R17 methylation, histone H3 R2 methylation, histone methylation, methylation, peptidyl-arginine methylation, to asymmetric dimethyl-arginine, transcription, DNA-templated                                                                                                                                                                                                             | 8,334  | 17,222 |
| DDX8                               | RNA secondary structure remodeling, a noncatalytic nuclear-transcribed mRNA catabolic process involved in deadenylation-dependent decay                                                                                                                                                                                                                                                                                                                              | 7,471  | 6,446  |
| BRP4A                              | glycoprotein metabolic process                                                                                                                                                                                                                                                                                                                                                                                                                                       | 8,334  | 12,831 |
| PAI                                | phenylalanine catabolic process, arginine catabolic process, aromatic amino acid family metabolic process, metabolic process, tyrosine catabolic process                                                                                                                                                                                                                                                                                                             | 8,446  | 4,231  |
| JOHNPH1                            | gene expression, mRNA processing, mRNA splicing, via spliceosome                                                                                                                                                                                                                                                                                                                                                                                                     | 7,471  | 21,232 |
| AK2                                | ADP biosynthetic process, AMP metabolic process, ATP metabolic process, nucleobase-containing compound metabolic process, nucleobase-containing small molecule interconversion, nucleotide phosphorylation, phosphorylation                                                                                                                                                                                                                                          | 8,334  | 8,446  |
| MAP1                               | ADAP biosynthetic process, carboxylate metabolic process, metabolic process, oxidation-reduction process                                                                                                                                                                                                                                                                                                                                                             | 3,734  | 15,871 |
| PSMD11                             | MAPK cascade, anaphase-promoting complex-dependent catabolic process, proteasome-mediated ubiquitin-dependent protein catabolic process, protein polyubiquitination, ubiquitin-dependent protein catabolic process                                                                                                                                                                                                                                                   | 3,734  | 15,871 |
| PSMD12                             | MAPK cascade, anaphase-promoting complex-dependent catabolic process, protein polyubiquitination                                                                                                                                                                                                                                                                                                                                                                     | 3,734  | 12,831 |
| PTK7                               | protein phosphorylation                                                                                                                                                                                                                                                                                                                                                                                                                                              | 8,334  | 21,232 |
| RPL18A                             | nuclear-transcribed mRNA catabolic process, nonsense-mediated decay, RNA processing, translation, translational initiation, viral transcription                                                                                                                                                                                                                                                                                                                      | 1,877  | 17,222 |
| TGPB10                             | transcription from RNA polymerase II promoter, ubiquitin-dependent SMAD protein catabolic process                                                                                                                                                                                                                                                                                                                                                                    | 1,877  | 23,846 |
| TNRC2                              | nuclear-transcribed mRNA catabolic process, nonsense-mediated decay, RNA processing, translation, translational initiation, viral transcription                                                                                                                                                                                                                                                                                                                      | 1,877  | 15,871 |
| TYNLL1                             | macrophage, transcription, DNA-templated                                                                                                                                                                                                                                                                                                                                                                                                                             | 8,446  | 12,831 |
| BAO2                               | protein metabolic process                                                                                                                                                                                                                                                                                                                                                                                                                                            | 8,446  | 8,446  |
| DPY3X                              | covalent chromatin modification, histone H3-K4 methylation, transcription, DNA-templated                                                                                                                                                                                                                                                                                                                                                                             | 7,471  | 15,774 |
| PCK2                               | NADH oxidation, gluconeogenesis, oxaloacetate metabolic process, pyruvate metabolic process                                                                                                                                                                                                                                                                                                                                                                          | 1,877  | 23,846 |
| RPL19                              | nuclear-transcribed mRNA catabolic process, nonsense-mediated decay, RNA processing, translation, translational initiation, viral transcription                                                                                                                                                                                                                                                                                                                      | 4,877  | 15,871 |
| LRDQ                               | heme biosynthetic process, heme metabolic process, protoporphyrinogen IX biosynthetic process                                                                                                                                                                                                                                                                                                                                                                        | 7,471  | 6,446  |
| ERH                                | nucleobase-containing compound metabolic process, pyrimidine nucleoside metabolic process, pyrimidine nucleoside biosynthetic process                                                                                                                                                                                                                                                                                                                                | 15,271 | 2,116  |
| HEPD                               | carboxylate metabolic process, glucose metabolic process, oxidation-reduction process, pentose-phosphate shunt                                                                                                                                                                                                                                                                                                                                                       | 8,334  | 2,116  |
| ACSL                               | de novo AMP biosynthetic process, de novo AMP biosynthetic process, aerobic respiration, purine nucleoside metabolic process, purine ribonucleoside monophosphate biosynthetic process, ribonucleoside monophosphate biosynthetic process                                                                                                                                                                                                                            | 2,889  | 17,222 |
| RPL14                              | nuclear-transcribed mRNA catabolic process, nonsense-mediated decay, RNA processing, translation, translational initiation, viral transcription                                                                                                                                                                                                                                                                                                                      | 2,889  | 15,871 |
| RPS12                              | nuclear-transcribed mRNA catabolic process, nonsense-mediated decay, RNA processing, translation, translational initiation, viral transcription                                                                                                                                                                                                                                                                                                                      | 8,334  | 23,846 |
| RPS22                              | nuclear-transcribed mRNA catabolic process, nonsense-mediated decay, RNA processing, translation, translational initiation, viral transcription                                                                                                                                                                                                                                                                                                                      | 8,334  | 23,846 |
| TALDO1                             | carbohydrate metabolic process, fructose 6-phosphate metabolic process, glyceraldehyde 3-phosphate metabolic process, pentose-phosphate shunt, non-oxidative branch, xylulose biosynthetic process                                                                                                                                                                                                                                                                   | 8,446  | 15,774 |
| PTGDS                              | RNA-dependent DNA biosynthetic process, cyclooxygenase pathway, fatty acid biosynthetic process, fatty acid metabolic process, lipid metabolic process, prostaglandin biosynthetic process, prostaglandin metabolic process, telomere maintenance                                                                                                                                                                                                                    | 3,734  | 17,222 |
| ATP5D                              | ATP biosynthetic process, ATP synthesis coupled proton transport, mitochondrial ATP synthase coupled proton transport                                                                                                                                                                                                                                                                                                                                                | 1,877  | 12,831 |
| DHRS7                              | oxidation-reduction process                                                                                                                                                                                                                                                                                                                                                                                                                                          | 3,734  | 15,871 |
| STOML2                             | mitochondrial ATP synthase coupled proton transport, mitochondrial protein processing                                                                                                                                                                                                                                                                                                                                                                                | 3,734  | 12,831 |
| PMCK                               | MAPK cascade, anaphase-promoting complex-dependent catabolic process, protein polyubiquitination, proteolysis                                                                                                                                                                                                                                                                                                                                                        | 7,471  | 6,446  |
| ATPPL                              | mitochondrial ATP synthase coupled proton transport                                                                                                                                                                                                                                                                                                                                                                                                                  | 2,889  | 15,871 |
| NTSE                               | AMP metabolic process, DNA metabolic process, adenosine biosynthetic process, dephosphorylation, nucleotide catabolic process, purine nucleoside catabolic process, pyrimidine nucleoside catabolic process                                                                                                                                                                                                                                                          | 8,334  | 19,237 |
| AKR1C1                             | bile acid metabolic process, bile alcohol metabolic process, bile alcohol metabolic process, oxidation-reduction process, pyruvate metabolic process, retinol metabolic process, xenobiotic metabolic process                                                                                                                                                                                                                                                        | 4,877  | 12,831 |
| PRMT1                              | histone H4 R3 methylation, methylation, peptidyl-arginine methylation, to asymmetric dimethyl-arginine                                                                                                                                                                                                                                                                                                                                                               | 8,446  | 8,446  |
| CBSL                               | cellular amino acid biosynthetic process, cysteine biosynthetic process, cysteine biosynthetic process from serine, cysteine biosynthetic process via cystathionine                                                                                                                                                                                                                                                                                                  | 7,471  | 12,831 |
| PUS                                | mRNA splicing, via spliceosome                                                                                                                                                                                                                                                                                                                                                                                                                                       | 7,471  | 12,831 |
| PSME1                              | MAPK cascade, anaphase-promoting complex-dependent catabolic process, protein polyubiquitination                                                                                                                                                                                                                                                                                                                                                                     | 2,889  | 15,871 |
| TPD3D                              | ADAP metabolic process, oxidation-reduction process                                                                                                                                                                                                                                                                                                                                                                                                                  | 2,889  | 15,871 |
| MECQ                               | DNA recombination, DNA strand resection, double-strand break repair via homologous recombination                                                                                                                                                                                                                                                                                                                                                                     | 8,334  | 19,237 |
| RPL12A                             | nuclear-transcribed mRNA catabolic process, nonsense-mediated decay, RNA processing, translation, translational initiation, viral transcription                                                                                                                                                                                                                                                                                                                      | 2,889  | 15,871 |
| TNCOV2                             | transcription from RNA polymerase II promoter                                                                                                                                                                                                                                                                                                                                                                                                                        | 8,446  | 8,446  |
| SCD1                               | glutathione metabolic process, hydrogen peroxide biosynthetic process, oxidation-reduction process, removal of superoxide radicals, superoxide anion generation, superoxide metabolic process                                                                                                                                                                                                                                                                        | 4,877  | 15,871 |
| TARDBP                             | RNA splicing, mRNA processing, transcription from RNA polymerase II promoter                                                                                                                                                                                                                                                                                                                                                                                         | 8,446  | 15,774 |
| US2K                               | cellular protein modification process, protein ubiquitination, protein ubiquitination involved in ubiquitin-dependent protein catabolic process, ubiquitin-dependent protein catabolic process                                                                                                                                                                                                                                                                       | 7,471  | 12,831 |
| ANKK1                              | autophagy                                                                                                                                                                                                                                                                                                                                                                                                                                                            | 4,877  | 12,831 |
| P3H3                               | collagen metabolic process, oxidation-reduction process, peptidyl-proline hydroxylation                                                                                                                                                                                                                                                                                                                                                                              | 3,734  | 15,871 |
| US2K                               | protein sumoylation                                                                                                                                                                                                                                                                                                                                                                                                                                                  | 2,889  | 17,222 |
| TNXL1                              | glycerol ether metabolic process, oxidation-reduction process, sulfate assimilation                                                                                                                                                                                                                                                                                                                                                                                  | 2,889  | 15,871 |
| ABHD10                             | cellular glucuronidation, glucuronide catabolic process                                                                                                                                                                                                                                                                                                                                                                                                              | 8,446  | 8,446  |
| DLRX                               | nucleobase-containing small molecule interconversion, oxidation-reduction process, protein dephosphorylation                                                                                                                                                                                                                                                                                                                                                         | 7,471  | 8,446  |
| ANP2A                              | transcription, DNA-templated                                                                                                                                                                                                                                                                                                                                                                                                                                         | 2,889  | 15,871 |
| DEC1                               | fatty acid beta-oxidation, lipid metabolic process, oxidation-reduction process                                                                                                                                                                                                                                                                                                                                                                                      | 8,446  | 4,231  |
| EP3H                               | MEK-dependent viral translational initiation, formation of translation preinitiation complex, translation, viral translational initiation-translation                                                                                                                                                                                                                                                                                                                | 1,877  | 15,871 |
| OPT2                               | UDP-A-acetylglucosamine biosynthetic process, carboxylate derivative biosynthetic process, carbohydrate metabolic process, energy reserve metabolic process, fructose 6-phosphate metabolic process, glutamine metabolic process                                                                                                                                                                                                                                     | 11,271 | 15,774 |
| LOXLS1                             | RNA splicing, mRNA processing                                                                                                                                                                                                                                                                                                                                                                                                                                        | 2,889  | 15,871 |
| ACA44                              | alpha-ketoglutarate metabolic process, bile acid metabolic process, fatty acid beta-oxidation, fatty acid beta-oxidation using acyl-CoA oxidase, very long-chain fatty acid metabolic process                                                                                                                                                                                                                                                                        | 8,446  | 19,237 |
| TNKS                               | peptidyl-cysteine oxidation                                                                                                                                                                                                                                                                                                                                                                                                                                          | 3,734  | 12,831 |
| ACPI                               | peptidyl-tyrosine dephosphorylation                                                                                                                                                                                                                                                                                                                                                                                                                                  | 4,877  | 15,774 |
| TNKS                               | transcription, DNA-templated                                                                                                                                                                                                                                                                                                                                                                                                                                         | 4,877  | 19,237 |
| UBE2Q2                             | protein K48-linked ubiquitination, protein autoubiquitination, ubiquitin-dependent protein catabolic process                                                                                                                                                                                                                                                                                                                                                         | 8,446  | 4,231  |
| JOHNPH2                            | gene expression, mRNA splicing, via spliceosome                                                                                                                                                                                                                                                                                                                                                                                                                      | 2,889  | 15,871 |

\*Exponentially Modified Protein Abundance Index ([http://www.matrixscience.com/help/quant\\_ompi\\_help.html](http://www.matrixscience.com/help/quant_ompi_help.html)).

**Table S8. Identification of endogenous proteins (Biological Process: response to stimulus) in hADSC; group CDM & DMEM.**

| Table S8. Identification of endogenous proteins (Biological Process: response to stimulus) in hADSC; group CDM & DMEM |                                                                                                                                                                                                                                                                                                                                   |        |         |
|-----------------------------------------------------------------------------------------------------------------------|-----------------------------------------------------------------------------------------------------------------------------------------------------------------------------------------------------------------------------------------------------------------------------------------------------------------------------------|--------|---------|
| UniProt/Swiss-Prot                                                                                                    | Biological Process                                                                                                                                                                                                                                                                                                                | anPA*  |         |
| Alternate ID                                                                                                          | response to stimulus                                                                                                                                                                                                                                                                                                              | CDM    | DMEM    |
| ACTA2                                                                                                                 | response to virus                                                                                                                                                                                                                                                                                                                 | 286276 | 439.10  |
| ITIH1                                                                                                                 | EMAP protein signal transduction, axon regeneration, cellular response to estradiol stimulus, cellular response to fibroblast growth factor stimulus, cellular response to oxidative stress, response to acrylamide, response to cocaine, response to estradiol                                                                   | 188.29 | 1189.85 |
| TUBB8                                                                                                                 | axon guidance, natural killer cell mediated cytotoxicity                                                                                                                                                                                                                                                                          | 468.41 | 862.32  |
| TUBB3                                                                                                                 | axon guidance                                                                                                                                                                                                                                                                                                                     | 296.38 | 219.18  |
| TUBB                                                                                                                  | natural killer cell mediated cytotoxicity                                                                                                                                                                                                                                                                                         | 284.44 | 298.85  |
| TUBB4B                                                                                                                | natural killer cell mediated cytotoxicity                                                                                                                                                                                                                                                                                         | 286.69 | 289.89  |
| MYH9                                                                                                                  | aggregation involved in sorcap development, axon guidance, cardiac muscle hypertrophy in response to stress, chemotaxis, hypotonic response, integrin-mediated signaling pathway, plasma membrane repair, platelet aggregation, response to hydrogen peroxide, response to mechanical stimulus                                    | 280.70 | 801.88  |
| ITIH2                                                                                                                 | axon guidance, plasma membrane repair                                                                                                                                                                                                                                                                                             | 18.86  | 124.84  |
| PLA2                                                                                                                  | adenosine cyclase-inhibiting G-protein coupled receptor signaling pathway, platelet aggregation, semaphorin-plexin signaling pathway, wound healing, spreading of cells                                                                                                                                                           | 123.59 | 884.68  |
| HSPP9A1                                                                                                               | ATP-mediated unfolded protein response, ERBB2 signaling pathway, Fc-gamma receptor signaling pathway involved in phagocytosis, aggregation involved in sorcap development, cellular response to ATP, cellular response to drug, cellular response to interleukin-4, cellular response to                                          | 439.85 | 454.16  |
| HSPP9B1                                                                                                               | ATP-mediated unfolded protein response, cellular response to ATP, response to endoplasmic reticulum stress, response to hypoxia, response to stress, retrograde protein transport, ER to cytosol, toll-like receptor signaling pathway, ubiquitin-dependent ERAD pathway                                                          | 57.75  | 180.91  |
| HSPP9A1.1                                                                                                             | ERBB2 signaling pathway, Fc-gamma receptor signaling pathway involved in phagocytosis, response to antibiotic, response to cocaine, response to cold, response to drug, response to estrogen, response to heat, response to salt stress, response to unfolded pro                                                                 | 129.75 | 163.74  |
| ALB                                                                                                                   | cellular oxidant detoxification, cellular response to starvation                                                                                                                                                                                                                                                                  | 688.52 | 47.35   |
| EPF1A1                                                                                                                | calcium-mediated signaling, cellular response to epidermal growth factor stimulus                                                                                                                                                                                                                                                 | 352.49 | 378.69  |
| HSFA8                                                                                                                 | ATP-mediated unfolded protein response, ER involved response, RE1-mediated unfolded protein response, PERK-mediated unfolded protein response, activation of signaling protein activity involved in unfolded protein response, axon guidance, cellular heat acclimation, cellular res                                             | 303.80 | 899.84  |
| HSFA1A                                                                                                                | cellular heat acclimation, cellular response to heat, cellular response to oxidative stress                                                                                                                                                                                                                                       | 15.88  | 51.66   |
| HSFA2                                                                                                                 | response to cold, response to heat, response to unfolded protein                                                                                                                                                                                                                                                                  | 19.81  | 36.59   |
| TUBA1B                                                                                                                | cellular response to interleukin-4, mechanosensory behavior, pigmenta                                                                                                                                                                                                                                                             | 339.56 | 293.74  |
| YWHAQ                                                                                                                 | small GTPase mediated signal transduction                                                                                                                                                                                                                                                                                         | 28.89  | 69.27   |
| YWHAB                                                                                                                 | cellular response to insulin stimulus                                                                                                                                                                                                                                                                                             | 26.82  | 47.35   |
| YWHAE                                                                                                                 | hippo signaling, intracellular signal transduction                                                                                                                                                                                                                                                                                | 42.96  | 81.65   |
| YWHAH                                                                                                                 | glucocorticoid receptor signaling pathway                                                                                                                                                                                                                                                                                         | 16.27  | 38.13   |
| ENO1                                                                                                                  | response to virus                                                                                                                                                                                                                                                                                                                 | 264.94 | 273.38  |
| ACTN4                                                                                                                 | MAPK cascade, axon guidance, peroxisome proliferator activated receptor signaling pathway, platelet aggregation, response to hypoxia, retinoic acid receptor signaling pathway                                                                                                                                                    | 158.41 | 514.44  |
| ACTN1                                                                                                                 | platelet aggregation                                                                                                                                                                                                                                                                                                              | 184.89 | 370.22  |
| TLN1                                                                                                                  | RE1-mediated unfolded protein response, platelet aggregation                                                                                                                                                                                                                                                                      | 151.87 | 374.42  |
| CLTC                                                                                                                  | RET signaling pathway, plexin cell polarity pathway, aggregation involved in sorcap development, response to osmotic stress, signal transduction                                                                                                                                                                                  | 163.40 | 244.22  |
| CLTCL1                                                                                                                | signal transduction                                                                                                                                                                                                                                                                                                               | 28.88  | 38.13   |
| PNB                                                                                                                   | cellular response to hypoxia, response to endoplasmic reticulum stress, response to reactive oxygen species                                                                                                                                                                                                                       | 136.34 | 236.78  |
| L2DA                                                                                                                  | response to cAMP, response to drug, response to estrogen, response to glucose, response to hydrogen peroxide, response to hypoxia, response to nutrient, response to organic cyclic compound                                                                                                                                      | 137.29 | 453.45  |
| EEF2                                                                                                                  | cellular response to brain-derived neurotrophic factor stimulus, cold acclimation, response to cytokinin, response to endoplasmic reticulum stress, response to estradiol, response to ethanol, response to folic acid, response to hydrogen peroxide, response to ischemia                                                       | 162.49 | 189.42  |
| ALDOA                                                                                                                 | mitotic G2 DNA damage checkpoint                                                                                                                                                                                                                                                                                                  | 110.19 | 279.82  |
| ANKK3                                                                                                                 | response to thyroid hormone                                                                                                                                                                                                                                                                                                       | 116.73 | 271.26  |
| PLEC                                                                                                                  | response to nutrient, wound healing                                                                                                                                                                                                                                                                                               | 62.18  | 284.12  |
| L2ALS1                                                                                                                | cellular response to glucose stimulus, cellular response to organic cyclic compound, multicellular organismal response to stress, plasma cell differentiation, response to axon injury, response to drug, signal transduction                                                                                                     | 118.60 | 180.81  |
| PN1                                                                                                                   | acute-phase response, cellular response to BMP stimulus, cellular response to angiotensin, cellular response to beta-amyloid, cellular response to glucose stimulus, cellular response to interleukin-1, cellular response to lipopolysaccharide, cellular respo                                                                  | 87.72  | 251.46  |
| COL1A1                                                                                                                | blood coagulation, cellular response to amino acid stimulus, cellular response to epidermal growth factor stimulus, cellular response to fibroblast growth factor stimulus, cellular response to fluoride, cellular response to mechanical stimulus, cellular response to retinoic acid, cellular response to transforming growth | 76.59  | 229.69  |
| SEPPORH1                                                                                                              | response to unfolded protein                                                                                                                                                                                                                                                                                                      | 127.94 | 189.28  |
| IQGAP1                                                                                                                | ERK1 and ERK2 cascade, Ras protein signal transduction, cellular response to calcium ion, cellular response to epidermal growth factor stimulus, cellular response to fibroblast growth factor stimulus, cellular response to organic substance, cellular response                                                                | 100.73 | 181.61  |
| UBA1                                                                                                                  | cellular response to DNA damage stimulus                                                                                                                                                                                                                                                                                          | 102.89 | 163.98  |
| PASN                                                                                                                  | cellular response to interleukin-4                                                                                                                                                                                                                                                                                                | 180.74 | 98.88   |
| PTN1                                                                                                                  | RET signaling pathway, plexin cell polarity pathway, cellular response to growth factor stimulus                                                                                                                                                                                                                                  | 155.80 | 157.13  |
| CALR                                                                                                                  | ATP-mediated unfolded protein response, cellular response to lithium ion, cellular response to organic substance, cellular senescence, glucocorticoid receptor signaling pathway, response to drug, response to estradiol, response to testosterone                                                                               | 116.80 | 120.94  |
| PDIA3                                                                                                                 | response to endoplasmic reticulum stress, signal transduction                                                                                                                                                                                                                                                                     | 84.88  | 142.66  |
| THSD1                                                                                                                 | behavioral response to pain, cellular response to growth factor stimulus, cellular response to heat, cellular response to tumor necrosis factor, chronic inflammatory response, immune response, response to calcium ion, response to drug, response to endoplasmic reticulum stress, response to glucose, response to            | 82.38  | 148.62  |
| CAP1                                                                                                                  | signal transduction                                                                                                                                                                                                                                                                                                               | 98.99  | 120.94  |
| VCP                                                                                                                   | ER-associated misfolded protein catalytic process, double-strand break repair, endoplasmic reticulum unfolded protein response, error-free translesion synthesis, retrograde protein transport, ER to cytosol, translesion synthesis, ubiquitin-dependent ERAD path                                                               | 85.82  | 133.45  |
| CTFL1                                                                                                                 | rho protein signal transduction, response to virus                                                                                                                                                                                                                                                                                | 128.81 | 94.86   |
| SDN                                                                                                                   | arrested muscle atrophy                                                                                                                                                                                                                                                                                                           | 89.65  | 99.01   |
| ANKK3                                                                                                                 | blood coagulation, positive regulation of macrophage in response to mitochondrial depolarization, response to organic substance, signal transduction, xenophagy                                                                                                                                                                   | 79.37  | 159.28  |
| BBR1                                                                                                                  | cellular response to cAMP, cellular response to platelet derived growth factor stimulus, cellular response to testosterone stimulus, cellular response to thyroid hormone stimulus, phosphatidylinositol-mediated signaling, protein kinase A signaling, sphingosine-1-phosphate signaling pathway                                | 87.72  | 129.81  |
| IZR                                                                                                                   | axon guidance, cellular response to cAMP, phosphatidylinositol-mediated signaling, protein kinase A signaling, sphingosine-1-phosphate signaling pathway                                                                                                                                                                          | 14.94  | 52.29   |
| RDX                                                                                                                   | cellular response to platelet-derived growth factor stimulus, cellular response to thyroid hormone stimulus, protein kinase A signaling                                                                                                                                                                                           | 12.14  | 34.44   |
| VCL                                                                                                                   | platelet aggregation                                                                                                                                                                                                                                                                                                              | 47.83  | 161.45  |
| MYO1D1                                                                                                                | B cell cytokine production, MyD88-dependent toll-like receptor signaling pathway, cellular response to heat, detection of misfolded protein, isotype switching to IgG1 response, response to ATP, response to activity, response to cocaine, response to cold, response to drug                                                   | 79.38  | 81.79   |
| COL6A1                                                                                                                | cellular response to amino acid stimulus                                                                                                                                                                                                                                                                                          | 78.64  | 81.79   |
| HSR6A1                                                                                                                | signal transduction                                                                                                                                                                                                                                                                                                               | 161.79 | 12.81   |
| CD1P1                                                                                                                 | cellular oxidant detoxification, cellular response to cell-matrix adhesion, cellular response to epidermal growth factor stimulus, cellular response to glucocorticoid stimulus, cellular response to insulin stimulus, cellular response to lipopolysaccharide, response to L-ascorbic acid, response to amino acid, response to | 88.83  | 124.84  |
| EPFA1                                                                                                                 | cellular response to brain-derived neurotrophic factor stimulus, cellular response to salivatin ion, response to organic cyclic compound                                                                                                                                                                                          | 79.37  | 86.16   |
| ARF4                                                                                                                  | epidermal growth factor receptor signaling pathway, response to axon injury, small GTPase mediated signal transduction                                                                                                                                                                                                            | 79.38  | 69.27   |
| ARF1                                                                                                                  | small GTPase mediated signal transduction                                                                                                                                                                                                                                                                                         | 46.89  | 23.88   |
| ARF3                                                                                                                  | small GTPase mediated signal transduction                                                                                                                                                                                                                                                                                         | 46.16  | 17.22   |
| ARF2                                                                                                                  | small GTPase mediated signal transduction                                                                                                                                                                                                                                                                                         | 13.86  | 16.07   |
| CAPK2                                                                                                                 | cellular response to amino acid stimulus, response to hypoxia                                                                                                                                                                                                                                                                     | 78.64  | 86.16   |
| HSR6A1.1                                                                                                              | protein kinase C-activating G-protein coupled receptor signaling pathway                                                                                                                                                                                                                                                          | 46.89  | 124.84  |
| HSR6A1.1                                                                                                              | signal transduction                                                                                                                                                                                                                                                                                                               | 79.38  | 59.98   |
| SPR1                                                                                                                  | Ras protein signal transduction                                                                                                                                                                                                                                                                                                   | 89.77  | 79.84   |
| ANKK1                                                                                                                 | G-protein coupled receptor signaling pathway, coupled to cyclic nucleotide second messenger, adaptive immune response, cell surface receptor signaling pathway, cellular response to glucocorticoid stimulus, cellular response to hydrogen peroxide, granulocyte chemotaxis, inflammatory response, innate immune                | 51.36  | 83.25   |
| COL1A2                                                                                                                | rho protein signal transduction, blood coagulation, cellular response to amino acid stimulus, platelet activation, transforming growth factor beta receptor signaling pathway                                                                                                                                                     | 26.82  | 118.39  |
| MYOF                                                                                                                  | cellular response to heat, plasma membrane repair                                                                                                                                                                                                                                                                                 | 27.26  | 113.93  |
| STAT1                                                                                                                 | JAK-STAT cascade, cellular response to cytokine stimulus, cellular response to insulin stimulus, cellular response to interferon-beta, cellular response to organic cyclic compound, defense response to virus, interferon-gamma-mediated signaling pathway, response to cAMP, response to drug, response to hydroge              | 86.37  | 64.87   |
| ANKK4                                                                                                                 | apoptotic signaling pathway                                                                                                                                                                                                                                                                                                       | 26.82  | 114.68  |
| MAP1B                                                                                                                 | cellular response to growth factor stimulus, cellular response to peptide hormone stimulus, induction of synaptic plasticity by chemical substance, peripheral nervous system axon regeneration, response to axon injury, response to carbonylamine, response to drug, response to estradiol, response to inorganic subst         | 26.82  | 120.91  |
| WUP                                                                                                                   | ERBB signaling pathway                                                                                                                                                                                                                                                                                                            | 46.89  | 98.88   |
| MYL3                                                                                                                  | sphrin receptor signaling pathway, platelet aggregation                                                                                                                                                                                                                                                                           | 46.16  | 92.98   |
| MYL1A                                                                                                                 | sphrin receptor signaling pathway, platelet aggregation                                                                                                                                                                                                                                                                           | 31.75  | 73.16   |
| TN                                                                                                                    | response to radiation, response to reactive oxygen species, signal transduction                                                                                                                                                                                                                                                   | 51.36  | 78.64   |
| HSR1                                                                                                                  | cellular response to vascular endothelial growth factor stimulus, intracellular signal transduction, platelet aggregation, positive regulation of endothelial cell chemotaxis by VEGF-activated vascular endothelial growth factor receptor signaling pathway, response to unfolded protein, response to virus, vascular endot    | 42.82  | 94.71   |
| CLC1                                                                                                                  | platelet aggregation, signal transduction                                                                                                                                                                                                                                                                                         | 44.83  | 64.87   |
| DYSL2                                                                                                                 | axon guidance, response to amphetamine, response to cocaine, response to drug, signal transduction                                                                                                                                                                                                                                | 42.82  | 129.18  |
| PLNB                                                                                                                  | cellular oxidant detoxification, response to reactive oxygen species                                                                                                                                                                                                                                                              | 46.16  | 139.91  |
| PEX18                                                                                                                 | cellular oxidant detoxification, response to reactive oxygen species                                                                                                                                                                                                                                                              | 46.16  | 64.87   |
| EPF1G                                                                                                                 | response to virus                                                                                                                                                                                                                                                                                                                 | 44.83  | 68.73   |
| MAHHA                                                                                                                 | response to drug, response to insulin                                                                                                                                                                                                                                                                                             | 42.86  | 66.73   |
| HYOU1                                                                                                                 | RE1-mediated unfolded protein response, cellular response to hypoxia, response to endoplasmic reticulum stress, response to ischemia                                                                                                                                                                                              | 34.26  | 63.96   |
| IDH1                                                                                                                  | response to organic cyclic compound, response to oxidative stress, response to steroid hormone                                                                                                                                                                                                                                    | 38.29  | 64.87   |
| IPDS                                                                                                                  | cellular response to amino acid stimulus                                                                                                                                                                                                                                                                                          | 31.75  | 163.32  |
| IPDS                                                                                                                  | cellular response to interferon-gamma                                                                                                                                                                                                                                                                                             | 31.75  | 113.16  |
| PSAP                                                                                                                  | adenylyl cyclase-inhibiting G-protein coupled receptor signaling pathway, cellular response to organic substance                                                                                                                                                                                                                  | 38.29  | 69.96   |
| CTB8                                                                                                                  | cellular response to thyroid hormone stimulus, toll-like receptor signaling pathway                                                                                                                                                                                                                                               | 42.82  | 46.89   |
| HSR4                                                                                                                  | response to unfolded protein                                                                                                                                                                                                                                                                                                      | 31.75  | 73.16   |
| ACTR3                                                                                                                 | Fc-gamma receptor signaling pathway involved in phagocytosis, sphrin receptor signaling pathway                                                                                                                                                                                                                                   | 31.75  | 68.12   |
| AAR5                                                                                                                  | cellular response to unfolded protein, endoplasmic reticulum unfolded protein response, response to amino acid                                                                                                                                                                                                                    | 26.82  | 88.10   |
| TNDC3                                                                                                                 | response to endoplasmic reticulum stress                                                                                                                                                                                                                                                                                          | 36.49  | 49.57   |
| PDIA8                                                                                                                 | RE1-mediated unfolded protein response, platelet aggregation, response to endoplasmic reticulum stress                                                                                                                                                                                                                            | 37.26  | 69.27   |
| PRKDC                                                                                                                 | cellular response to insulin stimulus, double-strand break repair, double-strand break repair via alternative nonhomologous end joining, intrinsic apoptotic signaling pathway in response to DNA damage, response to activity, response to gamma radiation, res                                                                  | 31.36  | 25.63   |
| UCR1L                                                                                                                 | response to ischemia                                                                                                                                                                                                                                                                                                              | 28.89  | 63.91   |
| PDIA8                                                                                                                 | peripheral nervous system axon regeneration, response to organic cyclic compound                                                                                                                                                                                                                                                  | 28.96  | 63.91   |
| HSR3                                                                                                                  | mitochondrial unfolded protein response                                                                                                                                                                                                                                                                                           | 28.95  | 68.88   |
| WMT                                                                                                                   | response to drug, response to organotin compound                                                                                                                                                                                                                                                                                  | 32.69  | 62.45   |

\*Exponentially Modified Protein Abundance Index ([http://www.malacards.com/help/quant\\_empir\\_help.html](http://www.malacards.com/help/quant_empir_help.html)).

Table S8. Cont 1.

| UniProt/Swiss-Prot ID | Biological Process                                                                                                                                                                                                                                                                                                                                                                                                                                                                                       | enrP47 |
|-----------------------|----------------------------------------------------------------------------------------------------------------------------------------------------------------------------------------------------------------------------------------------------------------------------------------------------------------------------------------------------------------------------------------------------------------------------------------------------------------------------------------------------------|--------|
| Alternate ID          | Biological regulation                                                                                                                                                                                                                                                                                                                                                                                                                                                                                    | COM    |
| RHNC                  | response to drug                                                                                                                                                                                                                                                                                                                                                                                                                                                                                         | 34.42  |
| RME                   | cellular response to UV-A, cellular response to cytokine stimulus                                                                                                                                                                                                                                                                                                                                                                                                                                        | 31.75  |
| RHBP1                 | signal transduction                                                                                                                                                                                                                                                                                                                                                                                                                                                                                      | 22.41  |
| TOB1                  | response to stimulus                                                                                                                                                                                                                                                                                                                                                                                                                                                                                     | 33.22  |
| GNB2                  | G-protein coupled acetylcholine receptor signaling pathway, Ras protein signal transduction, Wnt signaling pathway, calcium modulating pathway, adenylyate cyclase-activating dopamine receptor signaling pathway, cellular response to catecholamine stimulus, cellular response to glucagon stimulus, cellular response to glucagon stimulus, signal transduction                                                                                                                                      | 28.21  |
| GNB1                  | G-protein coupled acetylcholine receptor signaling pathway, Ras protein signal transduction, Wnt signaling pathway, calcium modulating pathway, adenylyate cyclase-activating dopamine receptor signaling pathway, cellular response to catecholamine stimulus, cellular response to glucagon stimulus, cellular response to glucagon stimulus, signal transduction                                                                                                                                      | 12.14  |
| GNB4                  | cellular response to glucagon stimulus, signal transduction                                                                                                                                                                                                                                                                                                                                                                                                                                              | 38.82  |
| PARK7                 | Ras protein signal transduction, cellular oxidant detoxification, cellular response to glyoxal, cellular response to hydrogen peroxide, cellular response to oxidative stress, cellular response to reactive oxygen species, detoxification of copper ion, detoxification of mercury                                                                                                                                                                                                                     | 26.21  |
| UGT1                  | ER-associated misfolded protein catabolic process, endoplasmic reticulum unfolded protein response                                                                                                                                                                                                                                                                                                                                                                                                       | 41.28  |
| GP1                   | humoral immune response, response to cadmium ion, response to estradiol, response to immobilization stress, response to morphine, response to muscle stretch, response to progesterone, response to testosterone                                                                                                                                                                                                                                                                                         | 28.88  |
| CCT5                  | response to virus                                                                                                                                                                                                                                                                                                                                                                                                                                                                                        | 34.95  |
| XPCCS                 | cellular hyperosmotic salinity response, cellular response to DNA damage stimulus, cellular response to X-ray, cellular response to fatty acid, cellular response to gamma radiation, double-strand break repair via nonhomologous end joining, response to drug                                                                                                                                                                                                                                         | 35.28  |
| PRDX1                 | adenylyate cyclase-activating dopamine receptor signaling pathway, platelet aggregation, response to drug                                                                                                                                                                                                                                                                                                                                                                                                | 24.28  |
| DEPO                  | cellular response to oxidative stress, response to ethanol, response to food, response to iron(II) ion, response to organic cyclic compound                                                                                                                                                                                                                                                                                                                                                              | 26.15  |
| PBMD2                 | Fc-epsilon receptor signaling pathway, MAPK cascade, NIK/NF-kappaB signaling, T cell receptor signaling pathway, Wnt signaling pathway, planar cell polarity pathway, stimulatory C-type lectin receptor signaling pathway, tumor necrosis factor-mediated signaling pathway                                                                                                                                                                                                                             | 19.81  |
| CLCA                  | cellular response to calcium ion                                                                                                                                                                                                                                                                                                                                                                                                                                                                         | 21.48  |
| RAC1                  | cellular response to glucose stimulus, cellular response to growth factor stimulus                                                                                                                                                                                                                                                                                                                                                                                                                       | 24.28  |
| PBMD1                 | Fc-epsilon receptor signaling pathway, MAPK cascade, NIK/NF-kappaB signaling, T cell receptor signaling pathway, Wnt signaling pathway, planar cell polarity pathway, stimulatory C-type lectin receptor signaling pathway, tumor necrosis factor-mediated signaling pathway                                                                                                                                                                                                                             | 19.81  |
| PP2D1A                | response to organic substance, second-messenger-mediated signaling                                                                                                                                                                                                                                                                                                                                                                                                                                       | 45.75  |
| SDC2                  | signal transduction, small GTPase mediated signal transduction                                                                                                                                                                                                                                                                                                                                                                                                                                           | 26.15  |
| GNAB2                 | G-protein coupled acetylcholine receptor signaling pathway, adaptation of signaling pathway by response to pheromone involved in conjugation with cellular fusion, adenosine receptor signaling pathway, adenylyate cyclase-activating G-protein coupled receptor signaling pathway, adenylyate cyclase-activating dopamine receptor signaling pathway, cellular response to catecholamine stimulus, cellular response to glucagon stimulus, cellular response to glucagon stimulus, signal transduction | 1.97   |
| ITGB1                 | cellular defense response, cellular response to low-density lipoprotein particle stimulus, integrin-mediated signaling pathway, transforming growth factor beta receptor signaling pathway, visual learning                                                                                                                                                                                                                                                                                              | 22.41  |
| MAPK1                 | B cell receptor signaling pathway, BMP signaling pathway, DNA damage induced protein phosphorylation, ERBB signaling pathway, ERK1 and ERK2 cascade, Fc-epsilon receptor signaling pathway, Fc-gamma receptor signaling pathway involved in phagocytosis, G-protein coupled receptor signal                                                                                                                                                                                                              | 8.80   |
| MAPK2                 | BMP signaling pathway, DNA damage induced protein phosphorylation, ERK1 and ERK2 cascade, Fc-epsilon receptor signaling pathway, Fc-gamma receptor signaling pathway involved in phagocytosis, JAK-STAT cascade involved in growth hormone signaling pathway, MAPK import into nucleus, axon                                                                                                                                                                                                             | 30.82  |
| PP1CA                 | beta-catenin destruction complex disassembly, enhancement of circadian clock by photoperiod, regulation of transcriptional inhibition by eIF2 alpha phosphorylation                                                                                                                                                                                                                                                                                                                                      | 26.21  |
| PP1CB                 | entrainment of circadian clock by photoperiod                                                                                                                                                                                                                                                                                                                                                                                                                                                            | 18.88  |
| RAE1B                 | cellular response to insulin stimulus, cellular response to nerve growth factor stimulus, defense response to bacterium, fibroblast growth factor receptor signaling pathway, response to cadmium ion, small GTPase mediated signal transduction                                                                                                                                                                                                                                                         | 8.80   |
| RAE1C                 | cellular response to nerve growth factor stimulus, small GTPase mediated signal transduction                                                                                                                                                                                                                                                                                                                                                                                                             | 6.94   |
| RAE1B                 | small GTPase mediated signal transduction                                                                                                                                                                                                                                                                                                                                                                                                                                                                | 19.81  |
| RAE1A                 | defense response to bacterium, small GTPase mediated signal transduction                                                                                                                                                                                                                                                                                                                                                                                                                                 | 19.81  |
| IFTN1                 | MAPK cascade, axon guidance                                                                                                                                                                                                                                                                                                                                                                                                                                                                              | 29.88  |
| ACTR2                 | Fc-gamma receptor signaling pathway involved in phagocytosis, ephrin receptor signaling pathway                                                                                                                                                                                                                                                                                                                                                                                                          | 29.21  |
| ARPC2                 | Fc-gamma receptor signaling pathway involved in phagocytosis, ephrin receptor signaling pathway                                                                                                                                                                                                                                                                                                                                                                                                          | 18.88  |
| CHN2                  | cellular response to mechanical stimulus                                                                                                                                                                                                                                                                                                                                                                                                                                                                 | 23.36  |
| GCN1                  | cellular response to amino acid starvation, cellular response to leucine starvation, cellular response to stress, positive regulation of transcription from RNA polymerase II promoter in response to stress                                                                                                                                                                                                                                                                                             | 28.82  |
| COL4A2                | response to glucose                                                                                                                                                                                                                                                                                                                                                                                                                                                                                      | 31.75  |
| MF                    | DNA damage response, signal transduction by p53 class mediator, cell surface receptor signaling pathway, inflammatory response, innate immune response, positive chemotaxis                                                                                                                                                                                                                                                                                                                              | 19.81  |
| VPB35                 | Wnt signaling pathway                                                                                                                                                                                                                                                                                                                                                                                                                                                                                    | 22.41  |
| PLD1                  | response to hypoxia                                                                                                                                                                                                                                                                                                                                                                                                                                                                                      | 19.81  |
| ATP13A                | insulin receptor signaling pathway                                                                                                                                                                                                                                                                                                                                                                                                                                                                       | 8.40   |
| VDAC1                 | behavioral fear response                                                                                                                                                                                                                                                                                                                                                                                                                                                                                 | 11.21  |
| AP2A1                 | Wnt signaling pathway, planar cell polarity pathway, ephrin receptor signaling pathway                                                                                                                                                                                                                                                                                                                                                                                                                   | 4.81   |
| AP2A2                 | Wnt signaling pathway, planar cell polarity pathway, ephrin receptor signaling pathway                                                                                                                                                                                                                                                                                                                                                                                                                   | 26.21  |
| RNRNPK                | signal transduction                                                                                                                                                                                                                                                                                                                                                                                                                                                                                      | 21.48  |
| ZYX                   | integrin-mediated signaling pathway, signal transduction, transforming growth factor beta receptor signaling pathway                                                                                                                                                                                                                                                                                                                                                                                     | 16.88  |
| TNC                   | cellular response to prostaglandin D2 stimulus, cellular response to retinoic acid, cellular response to vitamin D, peripheral nervous system axon regeneration, response to ethanol, response to fibroblast growth factor, response to mechanical stimulus, response to wounding, wound healing                                                                                                                                                                                                         | 26.15  |
| POD4                  | response to endoplasmic reticulum stress                                                                                                                                                                                                                                                                                                                                                                                                                                                                 | 16.81  |
| SEC11A                | IRE1-mediated unfolded protein response, response to calcium ion                                                                                                                                                                                                                                                                                                                                                                                                                                         | 22.41  |
| IRCC5                 | cellular hyperosmotic salinity response, cellular response to X-ray, cellular response to gamma radiation, double-strand break repair via classical nonhomologous end joining                                                                                                                                                                                                                                                                                                                            | 26.21  |
| APB1                  | Wnt signaling pathway, planar cell polarity pathway, ephrin receptor signaling pathway                                                                                                                                                                                                                                                                                                                                                                                                                   | 26.21  |
| OST1                  | cellular oxidant detoxification, cellular response to arsenic-containing substance, positive regulation of skeletal muscle contraction by regulation of release of sequestered calcium ion, regulation of cardiac muscle contraction by regulation of the release of sequestered calcium ion, xenobiotic catabolic process                                                                                                                                                                               | 26.15  |
| NPR1                  | Wnt signaling pathway, signal transduction by p53 class mediator resulting in cell cycle arrest, DNA repair, regulation of eIF2 alpha phosphorylation by dsRNA, signal transduction                                                                                                                                                                                                                                                                                                                      | 58.88  |
| DOB1                  | response to cytokine                                                                                                                                                                                                                                                                                                                                                                                                                                                                                     | 21.48  |
| PBP1                  | MAPK cascade                                                                                                                                                                                                                                                                                                                                                                                                                                                                                             | 20.85  |
| PRF3                  | DNA damage response, detection of DNA damage, DNA repair, cellular response to hydrogen peroxide, response to TNF agonist                                                                                                                                                                                                                                                                                                                                                                                | 16.88  |
| PRF4                  | innate immune response, signal transduction                                                                                                                                                                                                                                                                                                                                                                                                                                                              | 16.88  |
| PRF5                  | I-kappaB phosphorylation, cellular oxidant detoxification                                                                                                                                                                                                                                                                                                                                                                                                                                                | 26.21  |
| PRF6                  | Rho protein signal transduction, RhoGDI signaling pathway, Wnt signaling pathway, planar cell polarity pathway, apolipoprotein A1-mediated signaling pathway, ephrin receptor signaling pathway, negative chemotaxis, phosphatidylinositol-mediated signaling, platelet activation                                                                                                                                                                                                                       | 21.48  |
| RHOC                  | small GTPase mediated signal transduction, wound healing, spreading of cells                                                                                                                                                                                                                                                                                                                                                                                                                             | 16.81  |
| EEF1B2                | response to ethanol                                                                                                                                                                                                                                                                                                                                                                                                                                                                                      | 19.81  |
| CTSK                  | beta-1a receptor signaling pathway                                                                                                                                                                                                                                                                                                                                                                                                                                                                       | 29.88  |
| PERM2                 | Wnt signaling pathway, integrin-mediated signaling pathway, transforming growth factor beta receptor signaling pathway                                                                                                                                                                                                                                                                                                                                                                                   | 13.87  |
| MYO1C                 | Fc-gamma receptor signaling pathway involved in phagocytosis, positive regulation of cell migration by vascular endothelial growth factor signaling pathway                                                                                                                                                                                                                                                                                                                                              | 17.74  |
| NBE1                  | cellular response to drug, cellular response to fatty acid, cellular response to glucose stimulus, response to arabin, response to cAMP, response to drug, response to testosterone                                                                                                                                                                                                                                                                                                                      | 48.88  |
| PRDX3                 | cellular oxidant detoxification, cellular response to reactive oxygen species, inflammatory response, response to oxidative stress                                                                                                                                                                                                                                                                                                                                                                       | 14.81  |
| RAE1B                 | Rap protein signal transduction, cellular response to cAMP, cellular response to drug, cellular response to glucose stimulus, cellular response to gonadotropin-releasing hormone, cellular response to nerve growth factor stimulus, cellular response to organic cyclic compound, nerve growth factor signaling pathway, response to antipain                                                                                                                                                          | 22.41  |
| RAE1A                 | Rap protein signal transduction, cellular response to cAMP, cellular response to drug, cellular response to glucose stimulus, cellular response to nerve growth factor stimulus, cellular response to organic cyclic compound, nerve growth factor signaling pathway, response to antipain                                                                                                                                                                                                               | 16.81  |
| IFTN1                 | MAPK cascade, SMAD protein import into nucleus, axon guidance, common-partner SMAD protein phosphorylation                                                                                                                                                                                                                                                                                                                                                                                               | 14.81  |
| ARHGAP1               | Rho protein signal transduction, small GTPase mediated signal transduction                                                                                                                                                                                                                                                                                                                                                                                                                               | 16.88  |
| SPARC                 | cellular response to growth factor stimulus, response to L-ascorbic acid, response to cAMP, response to cadmium ion, response to calcium ion, response to cytokine, response to ethanol, response to glucocorticoid, response to gravity, response to lead ion, response to lipopolysaccharide, response to peptide hormone                                                                                                                                                                              | 14.81  |
| ATP1A1                | cellular response to mechanical stimulus, cellular response to steroid hormone stimulus, response to drug, response to glyoxal                                                                                                                                                                                                                                                                                                                                                                           | 26.21  |
| ARHGAP1               | semaphorin-plexin signaling pathway                                                                                                                                                                                                                                                                                                                                                                                                                                                                      | 16.81  |
| PI3P1                 | RhoGDI signaling pathway                                                                                                                                                                                                                                                                                                                                                                                                                                                                                 | 13.87  |
| ATP13B2               | insulin receptor signaling pathway                                                                                                                                                                                                                                                                                                                                                                                                                                                                       | 11.21  |
| PLD2                  | cellular response to hormone stimulus, response to hypoxia                                                                                                                                                                                                                                                                                                                                                                                                                                               | 12.14  |
| TNFRD1                | cellular oxidant detoxification, response to reactive oxygen species, signal transduction                                                                                                                                                                                                                                                                                                                                                                                                                | 2.88   |
| ACD5                  | response to lipopolysaccharide, response to retroviral stress, response to redox state                                                                                                                                                                                                                                                                                                                                                                                                                   | 17.74  |
| COMT                  | cellular response to phosphate starvation, response to drug, response to lipopolysaccharide, response to organic cyclic compound, response to pain                                                                                                                                                                                                                                                                                                                                                       | 14.81  |
| NBE2                  | cellular response to fatty acid, cellular response to glucose stimulus, cellular response to oxidative stress, integrin-mediated signaling pathway, response to growth hormone                                                                                                                                                                                                                                                                                                                           | 45.75  |
| PLD3                  | cellular response to hormone stimulus                                                                                                                                                                                                                                                                                                                                                                                                                                                                    | 13.87  |
| PBMD4                 | Fc-epsilon receptor signaling pathway, MAPK cascade, NIK/NF-kappaB signaling, T cell receptor signaling pathway, Wnt signaling pathway, planar cell polarity pathway, stimulatory C-type lectin receptor signaling pathway, tumor necrosis factor-mediated signaling pathway                                                                                                                                                                                                                             | 19.81  |
| BERPBB                | cellular response to osmotic stress                                                                                                                                                                                                                                                                                                                                                                                                                                                                      | 5.80   |
| SLC24A4               | active induction of host immune response by virus                                                                                                                                                                                                                                                                                                                                                                                                                                                        | 14.81  |
| ARPC1B                | Fc-gamma receptor signaling pathway involved in phagocytosis, ephrin receptor signaling pathway, response to estrogen                                                                                                                                                                                                                                                                                                                                                                                    | 16.88  |
| C1QB                  | adaptive immune response, blood coagulation, intrinsic pathway, complement activation, classical pathway, innate immune response, phosphatidylinositol 3-kinase signaling                                                                                                                                                                                                                                                                                                                                | 16.88  |
| CSRP1                 | platelet aggregation                                                                                                                                                                                                                                                                                                                                                                                                                                                                                     | 5.80   |
| GFP11                 | IRE1-mediated unfolded protein response                                                                                                                                                                                                                                                                                                                                                                                                                                                                  | 16.88  |
| EPF41                 | behavioral fear response                                                                                                                                                                                                                                                                                                                                                                                                                                                                                 | 21.48  |
| RAE1C                 | blood coagulation, receptor internalization involved in canonical Wnt signaling pathway, small GTPase mediated signal transduction                                                                                                                                                                                                                                                                                                                                                                       | 9.34   |
| CD48                  | endosome to melanosome transport, pigment granule maturation                                                                                                                                                                                                                                                                                                                                                                                                                                             | 20.85  |
| ATP2A2                | ER-nucleus signaling pathway, cardiac muscle hypertrophy in response to stress, cellular response to oxidative stress, regulation of cardiac muscle contraction by calcium ion signaling, response to endoplasmic reticulum stress, response to peptide hormone                                                                                                                                                                                                                                          | 7.47   |
| CDND1C                | signal transduction                                                                                                                                                                                                                                                                                                                                                                                                                                                                                      | 14.81  |
| DOXKX                 | Wnt signaling pathway, cellular response to arsenic-containing substance, cellular response to osmotic stress, extrinsic apoptotic signaling pathway via death domain receptors, innate immune response, intracellular signal transduction, intrinsic apoptotic signaling pathway, response to virus                                                                                                                                                                                                     | 16.88  |
| PAPEB2                | blood coagulation                                                                                                                                                                                                                                                                                                                                                                                                                                                                                        | 14.81  |
| RAE1                  | androgen receptor signaling pathway, signal transduction, small GTPase mediated signal transduction                                                                                                                                                                                                                                                                                                                                                                                                      | 16.88  |
| ITP1                  | response to stress                                                                                                                                                                                                                                                                                                                                                                                                                                                                                       | 11.21  |
| EPF1D                 | cellular response to ionizing radiation, signal transduction                                                                                                                                                                                                                                                                                                                                                                                                                                             | 19.81  |
| COL1A1                | cellular response to amino acid stimulus, integrin-mediated signaling pathway, platelet activation, response to cytokine, response to mechanical stimulus, response to radiation, transforming growth factor beta receptor signaling pathway                                                                                                                                                                                                                                                             | 17.74  |
| PRKCSH                | intracellular signal transduction                                                                                                                                                                                                                                                                                                                                                                                                                                                                        | 14.81  |

\*Exponentially Modified Protein Abundance Index ([http://www.msystems.cmc.com/help/quant\\_enrP47\\_help.html](http://www.msystems.cmc.com/help/quant_enrP47_help.html)).

Table 58. Cont.

\*Exponentially Modified Protein Abundance Index ([http://www.matrixscience.com/help/quant\\_empai\\_help.html](http://www.matrixscience.com/help/quant_empai_help.html))

Table S8. Cont 3

| UniProt/Swiss-Prot ID | Biological Process                                                                                                                                                                                                                                                                                                     | enrichment | enrichment |
|-----------------------|------------------------------------------------------------------------------------------------------------------------------------------------------------------------------------------------------------------------------------------------------------------------------------------------------------------------|------------|------------|
| Alternate ID          | biological regulation                                                                                                                                                                                                                                                                                                  | CDM        | DMEM       |
| PCNA                  | DNA damage responses, detection of DNA damage, DNA damage responses, signal transduction by p53 class mediator resulting in cell cycle arrest, cellular response to UV, cellular response to hydrogen peroxide, error-free translation synthesis, error-prone translation synthesis, mismatch repair, nucle            | 9.34       | 19.78      |
| PEMB8                 | Fc-epson receptor signaling pathway, MAPK cascade, NIK/NF-kappaB signaling, T cell receptor signaling pathway, Wnt signaling pathway, planar cell polarity pathway, stimulatory C-type lectin receptor signaling pathway, tumor necrosis factor-mediated signaling pathway                                             | 8.48       | 19.07      |
| PSMD7                 | Fc-epson receptor signaling pathway, MAPK cascade, NIK/NF-kappaB signaling, T cell receptor signaling pathway, Wnt signaling pathway, planar cell polarity pathway, stimulatory C-type lectin receptor signaling pathway, tumor necrosis factor-mediated signaling pathway                                             | 4.87       | 19.37      |
| TPO                   | signal transduction                                                                                                                                                                                                                                                                                                    | 3.74       | 19.22      |
| TSPO                  | behavioral response to pain, cellular hypoxic response, cellular response to lipopolysaccharide, cellular response to zinc ion, peripheral nervous system axon regeneration, response to axon injury, response to drug, response to manganese ion, response to                                                         | 9.34       | 18.61      |
| SEPPIN1               | cellular response to lipopolysaccharide, defense response to Gram-negative bacterium                                                                                                                                                                                                                                   | 4.87       | 21.82      |
| SCN2D                 | ubiquitin-dependent ERAD pathway                                                                                                                                                                                                                                                                                       | 6.54       | 19.91      |
| FBLN1                 | blood coagulation, fibrin clot formation, integrin-mediated signaling pathway                                                                                                                                                                                                                                          | 4.87       | 23.68      |
| PPP3R4                | Fc-epson receptor signaling pathway, Wnt signaling pathway, calcium modulating pathway, calcineurin-NFAT signaling cascade, calcium-mediated signaling, cardiac muscle hypertrophy in response to stress, cellular response to drug, cellular response to glucose stimulus, excitatory postsynaptic potential, musc    | 1.87       | 17.22      |
| COTL1                 | defense response to fungus                                                                                                                                                                                                                                                                                             | 10.27      | 8.61       |
| CTNND1                | Wnt signaling pathway                                                                                                                                                                                                                                                                                                  | 4.87       | 21.82      |
| DNAJB11               | IRE1-mediated unfolded protein response                                                                                                                                                                                                                                                                                | 8.54       | 19.07      |
| DNM1L                 | release of cytochrome c from mitochondria                                                                                                                                                                                                                                                                              | 6.54       | 17.22      |
| GPNMB                 | positive chemotaxis                                                                                                                                                                                                                                                                                                    | 12.14      | 4.31       |
| PEA3                  | DNA damage checkpoint, MAPK cascade, response to morphine                                                                                                                                                                                                                                                              | 6.54       | 19.37      |
| PRDX2                 | cellular response to oxidative stress, removal of superoxide radicals, response to oxidative stress, response to reactive oxygen species                                                                                                                                                                               | 11.24      | 19.37      |
| PEMB1                 | Fc-epson receptor signaling pathway, MAPK cascade, NIK/NF-kappaB signaling, T cell receptor signaling pathway, Wnt signaling pathway, planar cell polarity pathway, stimulatory C-type lectin receptor signaling pathway, tumor necrosis factor-mediated signaling pathway                                             | 6.54       | 17.22      |
| SCFD1                 | response to hypoxia, response to toxic substance                                                                                                                                                                                                                                                                       | 8.48       | 19.91      |
| TANC217               | cellular oxidant detoxification, tumor necrosis factor-mediated signaling pathway                                                                                                                                                                                                                                      | 6.54       | 21.82      |
| RPPI5A                | response to virus                                                                                                                                                                                                                                                                                                      | 6.54       | 19.37      |
| MC1R1                 | cellular response to DNA damage stimulus                                                                                                                                                                                                                                                                               | 9.34       | 19.91      |
| PSMD7                 | Fc-epson receptor signaling pathway, MAPK cascade, NIK/NF-kappaB signaling, T cell receptor signaling pathway, Wnt signaling pathway, planar cell polarity pathway, stimulatory C-type lectin receptor signaling pathway, tumor necrosis factor-mediated signaling pathway                                             | 9.34       | 19.91      |
| PEMB8                 | Fc-epson receptor signaling pathway, MAPK cascade, NIK/NF-kappaB signaling, T cell receptor signaling pathway, Wnt signaling pathway, planar cell polarity pathway, stimulatory C-type lectin receptor signaling pathway, tumor necrosis factor-mediated signaling pathway, ubiquitin-dependent ERAD pathway           | 7.47       | 19.78      |
| RAB2A                 | small GTPase mediated signal transduction                                                                                                                                                                                                                                                                              | 3.74       | 19.37      |
| TGDS                  | integrin-mediated signaling pathway, transforming growth factor beta receptor signaling pathway                                                                                                                                                                                                                        | 3.74       | 23.68      |
| EPF8                  | response to insulin                                                                                                                                                                                                                                                                                                    | 7.47       | 19.78      |
| PPP1R12A              | cellular response to drug, signal transduction                                                                                                                                                                                                                                                                         | 8.54       | 19.07      |
| SH2D1                 | signal transduction                                                                                                                                                                                                                                                                                                    | 11.24      | 4.31       |
| CHP21                 | enzyme-linked receptor protein signaling pathway                                                                                                                                                                                                                                                                       | 8.54       | 19.07      |
| CYC3                  | intrinsic apoptotic signaling pathway, response to reactive oxygen species                                                                                                                                                                                                                                             | 12.14      | 4.31       |
| DNAM1                 | axon guidance                                                                                                                                                                                                                                                                                                          | 4.87       | 19.37      |
| QDS                   | response to amino acid, response to cadmium ion, response to nutrient levels, response to oxidative stress, response to tumor necrosis factor, response to xenobiotic stimulus                                                                                                                                         | 4.87       | 19.37      |
| NADH                  | response to activity, response to drug, response to hormone, response to insulin                                                                                                                                                                                                                                       | 8.54       | 19.07      |
| DTYR1                 | DNA repair, adaptive immune response, cellular response to interleukin-1                                                                                                                                                                                                                                               | 6.54       | 19.91      |
| VAPB                  | axon guidance                                                                                                                                                                                                                                                                                                          | 3.74       | 19.91      |
| KPNA4                 | response to hydrogen peroxide                                                                                                                                                                                                                                                                                          | 9.34       | 19.07      |
| PSTL1                 | MAPK signaling pathway, response to starvation                                                                                                                                                                                                                                                                         | 9.34       | 19.78      |
| STAT2                 | JAK-STAT cascade, defense response to virus, signal transduction, type I interferon signaling pathway                                                                                                                                                                                                                  | 7.47       | 18.48      |
| ASPM                  | cellular response to calcium ion, detection of calcium ion, regulation of cardiac muscle contraction by regulation of the release of sequestered calcium ion, response to ATP                                                                                                                                          | 10.27      | 2.15       |
| ACSL3                 | response to nutrient, response to organic cyclic compound                                                                                                                                                                                                                                                              | 11.24      | 8.48       |
| APTX1                 | base excision repair, base-free sugar-phosphate removal, cellular response to DNA damage stimulus, cellular response to cAMP, cellular response to hydrogen peroxide, cellular response to organonitrogen compound, cellular response to peptide hormone stimulus, response to drug                                    | 12.14      | 1.15       |
| APF8                  | small GTPase mediated signal transduction                                                                                                                                                                                                                                                                              | 6.54       | 19.07      |
| DDI1                  | DNA damage responses, detection of DNA damage, UV damage excision repair, Wnt signaling pathway, global genome nucleotide excision repair, nucleotide excision repair, DNA damage recognition, nucleotide excision repair, DNA duplex unwinding, nucleotide excis                                                      | 4.87       | 17.22      |
| DNAJB4                | response to heat, response to unfolded protein                                                                                                                                                                                                                                                                         | 6.54       | 19.91      |
| ENPP1                 | cellular response to insulin stimulus, immune response                                                                                                                                                                                                                                                                 | 6.54       | 19.91      |
| OSTK1                 | cellular oxidant detoxification                                                                                                                                                                                                                                                                                        | 6.54       | 19.07      |
| SECA                  | SMAD protein signal transduction                                                                                                                                                                                                                                                                                       | 6.54       | 19.91      |
| LXN1                  | blood coagulation                                                                                                                                                                                                                                                                                                      | 6.54       | 19.91      |
| POR                   | cellular response to follicle-stimulating hormone stimulus, cellular response to gonadotropin stimulus, cellular response to peptide hormone stimulus, response to drug, response to nutrient, xenobiotic metabolic process                                                                                            | 9.34       | 18.48      |
| PCOLCE                | response to hypoxia, response to oxidative stress                                                                                                                                                                                                                                                                      | 3.74       | 19.91      |
| PRDX2                 | cellular oxidant detoxification, cellular response to oxidative stress, cellular response to reactive oxygen species, response to hydrogen peroxide, response to lipopolysaccharide, response to oxidative stress                                                                                                      | 7.47       | 19.91      |
| PSMD4                 | Fc-epson receptor signaling pathway, MAPK cascade, NIK/NF-kappaB signaling, T cell receptor signaling pathway, Wnt signaling pathway, planar cell polarity pathway, stimulatory C-type lectin receptor signaling pathway, tumor necrosis factor-mediated signaling pathway                                             | 4.87       | 19.37      |
| GAIT                  | response to biogenic substance, response to organic substance                                                                                                                                                                                                                                                          | 6.54       | 19.78      |
| SKP1                  | Fc-epson receptor signaling pathway, NIK/NF-kappaB signaling, T cell receptor signaling pathway, Wnt signaling pathway, stimulatory C-type lectin receptor signaling pathway, stress-activated MAPK cascade                                                                                                            | 3.74       | 21.82      |
| TAX1BP3               | Rho protein signal transduction, Wnt signaling pathway                                                                                                                                                                                                                                                                 | 1.87       | 23.68      |
| IRF2K                 | cellular response to interferon beta, intrinsic apoptotic signaling pathway in response to endoplasmic reticulum stress                                                                                                                                                                                                | 7.47       | 19.91      |
| ATP4VE1               | insulin receptor signaling pathway                                                                                                                                                                                                                                                                                     | 6.54       | 19.91      |
| AP1B1                 | blood coagulation                                                                                                                                                                                                                                                                                                      | 4.87       | 19.91      |
| CDH1                  | cell surface receptor signaling pathway, cellular response to low-density lipoprotein particle stimulus                                                                                                                                                                                                                | 6.54       | 17.22      |
| MSD1                  | cellular oxidant detoxification, cellular response to lipid hydroperoxide, response to drug, response to lipopolysaccharide, response to organonitrogen compound, xenobiotic metabolic process                                                                                                                         | 8.48       | 19.78      |
| CTP81                 | response to drug                                                                                                                                                                                                                                                                                                       | 7.47       | 19.91      |
| RA11                  | Fc-epson receptor signaling pathway, Fc gamma receptor signaling pathway involved in phagocytosis, G-protein coupled receptor signaling pathway, Wnt signaling pathway, planar cell polarity pathway, axon guidance, blood coagulation, cellular response to mechanical stimulus, sphrin receptor signaling pathway    | 3.74       | 19.07      |
| GPX1                  | UV protection, angiogenesis involved in wound healing, cellular oxidant detoxification, cellular response to oxidative stress, intrinsic apoptotic signaling pathway in response to oxidative stress, response to gamma radiation, response to hydrogen peroxide, response to hyd                                      | 3.74       | 19.91      |
| CTNND1                | Wnt signaling pathway, calcium modulating pathway, androgen receptor signaling pathway, beta-catenin destruction complex disassembly, canonical Wnt signaling pathway, canonical Wnt signaling pathway involved in midbrain dopaminergic neuron differentiation, canonical Wnt signaling pathway involved in regulat   | 6.54       | 21.82      |
| CARM1                 | DNA damage responses, signal transduction by p53 class mediator resulting in cell cycle arrest, intracellular estrogen receptor signaling pathway, response to cAMP                                                                                                                                                    | 6.54       | 19.91      |
| SRP44                 | response to endoplasmic reticulum stress, response to unfolded protein                                                                                                                                                                                                                                                 | 6.54       | 19.91      |
| IRAK1                 | fibroblast growth factor receptor signaling pathway                                                                                                                                                                                                                                                                    | 7.47       | 23.68      |
| LRPI1                 | cellular response to transforming growth factor beta stimulus                                                                                                                                                                                                                                                          | 6.54       | 19.91      |
| ME1                   | response to carbohydrate, response to hormone                                                                                                                                                                                                                                                                          | 3.74       | 17.22      |
| PSMD11                | Fc-epson receptor signaling pathway, MAPK cascade, NIK/NF-kappaB signaling, T cell receptor signaling pathway, Wnt signaling pathway, planar cell polarity pathway, stimulatory C-type lectin receptor signaling pathway, tumor necrosis factor-mediated signaling pathway                                             | 3.74       | 19.37      |
| PSMD12                | Fc-epson receptor signaling pathway, MAPK cascade, NIK/NF-kappaB signaling, T cell receptor signaling pathway, Wnt signaling pathway, planar cell polarity pathway, stimulatory C-type lectin receptor signaling pathway, tumor necrosis factor-mediated signaling pathway                                             | 3.74       | 19.91      |
| PTK7                  | canonical Wnt signaling pathway, cellular response to retinoic acid, planar cell polarity pathway involved in neural tube closure, signal transduction, wound healing                                                                                                                                                  | 6.54       | 21.82      |
| TOPB101               | Wnt signaling pathway, androgen receptor signaling pathway, response to heat, ubiquitin-dependent SMAD protein catabolic process                                                                                                                                                                                       | 1.87       | 23.68      |
| TRIM2                 | DNA damage, Ras protein signal transduction, innate immune response                                                                                                                                                                                                                                                    | 6.54       | 19.78      |
| VPS29                 | Wnt signaling pathway                                                                                                                                                                                                                                                                                                  | 6.54       | 19.91      |
| SSR1                  | IRE1-mediated unfolded protein response                                                                                                                                                                                                                                                                                | 4.87       | 17.22      |
| POK2                  | cellular response to glucose stimulus, cellular response to tumor necrosis factor, response to dexamethasone, response to lipopolysaccharide                                                                                                                                                                           | 1.87       | 23.68      |
| DNAJA1                | DNA damage responses, detection of DNA damage, androgen receptor signaling pathway, response to heat, response to unfolded protein                                                                                                                                                                                     | 7.47       | 8.61       |
| EXOC1                 | phosphatidylinositol-mediated signaling                                                                                                                                                                                                                                                                                | 9.34       | 2.15       |
| ADSL                  | response to hypoxia, response to muscle activity, response to nutrient, response to starvation                                                                                                                                                                                                                         | 2.86       | 17.22      |
| PTGS1                 | signal transduction                                                                                                                                                                                                                                                                                                    | 3.74       | 17.22      |
| DNAJA2                | response to heat                                                                                                                                                                                                                                                                                                       | 7.47       | 8.61       |
| BTBDL2                | T cell receptor signaling pathway, stress-induced mitochondrial fusion                                                                                                                                                                                                                                                 | 2.74       | 19.91      |
| MACP1                 | Wnt signaling pathway, wound healing                                                                                                                                                                                                                                                                                   | 4.87       | 19.91      |
| PSMD8                 | Fc-epson receptor signaling pathway, MAPK cascade, NIK/NF-kappaB signaling, T cell receptor signaling pathway, Wnt signaling pathway, planar cell polarity pathway, stimulatory C-type lectin receptor signaling pathway, tumor necrosis factor-mediated signaling pathway                                             | 7.47       | 18.48      |
| ARH1C1                | cellular response to jasmonic acid stimulus, response to organophosphorus, xenobiotic metabolic process                                                                                                                                                                                                                | 4.87       | 19.91      |
| PRMT1                 | DNA damage responses, signal transduction by p53 class mediator resulting in cell cycle arrest, cell surface receptor signaling pathway                                                                                                                                                                                | 6.54       | 8.61       |
| ANKA1                 | response to calcium ion                                                                                                                                                                                                                                                                                                | 6.54       | 21.82      |
| PUS                   | cellular response to calcium ion                                                                                                                                                                                                                                                                                       | 7.47       | 19.91      |
| DNAD                  | G-protein coupled acetylcholine receptor signaling pathway, adenylyl cyclase-activating G-protein coupled receptor signaling pathway, blood coagulation, cellular response to pH, entrainment of circadian clock, glutamate receptor signaling pathway, phospholipase C-activating dopamine receptor signaling pathway | 3.74       | 19.91      |
| PRKAR1A               | blood coagulation, cellular response to glucose stimulus, intracellular signal transduction                                                                                                                                                                                                                            | 6.54       | 19.78      |
| MEB3                  | Wnt signaling pathway                                                                                                                                                                                                                                                                                                  | 6.54       | 8.61       |
| PSR1                  | Fc-epson receptor signaling pathway, MAPK cascade, NIK/NF-kappaB signaling, T cell receptor signaling pathway, Wnt signaling pathway, planar cell polarity pathway, stimulatory C-type lectin receptor signaling pathway, tumor necrosis factor-mediated signaling pathway                                             | 3.86       | 19.07      |
| RECQL                 | double-strand break repair via homologous recombination                                                                                                                                                                                                                                                                | 6.54       | 19.37      |
| TRIOV2                | response to UV, smoothed signaling pathway                                                                                                                                                                                                                                                                             | 6.54       | 8.61       |
| SCD1                  | cellular response to ATP, cellular response to calcium ion, cellular response to oxidative stress, cellular response to potassium ion, removal of superoxide radicals, response to amphetamine, response to antibiotic, response to antipsychotic drug, response to axon injury, response to carbon monoxide, response | 4.87       | 19.07      |
| SRFBF2                | response to drug                                                                                                                                                                                                                                                                                                       | 3.74       | 19.07      |
| SRFBF8                | IRE1-mediated unfolded protein response, small GTPase mediated signal transduction                                                                                                                                                                                                                                     | 2.86       | 19.07      |
| TACR2P                | response to endoplasmic reticulum stress                                                                                                                                                                                                                                                                               | 6.54       | 19.78      |
| ANKA7                 | response to calcium ion, response to organic cyclic compound, response to salt stress                                                                                                                                                                                                                                  | 4.87       | 19.91      |

\*Exponentially Modified Protein Abundance Index ([http://www.matrixscience.com/help/quant\\_empai\\_help.html](http://www.matrixscience.com/help/quant_empai_help.html)).

Table S8. Cont 4

| UniProt/Swiss-Prot ID | Biological Process                                                                                                                                                                                                                                                   | enrichment | enrichment |
|-----------------------|----------------------------------------------------------------------------------------------------------------------------------------------------------------------------------------------------------------------------------------------------------------------|------------|------------|
| Alternate ID          | biological regulation                                                                                                                                                                                                                                                | CDM        | DMEM       |
| TAK1L1                | cellular response to oxidative stress                                                                                                                                                                                                                                | 2.86       | 19.07      |
| ANP32A                | intracellular signal transduction                                                                                                                                                                                                                                    | 2.86       | 19.37      |
| LGALB3                | antibiotic chemotaxis, innate immune response, macrophage chemotaxis, monocyte chemotaxis, neutrophil chemotaxis, positive chemotaxis                                                                                                                                | 2.86       | 19.07      |
| PARVA                 | smooth muscle cell chemotaxis                                                                                                                                                                                                                                        | 4.87       | 19.78      |
| SRPRK                 | IRE1-mediated unfolded protein response                                                                                                                                                                                                                              | 4.87       | 19.91      |
| TRK3                  | response to endoplasmic reticulum stress                                                                                                                                                                                                                             | 3.74       | 19.91      |
| YBX3                  | cellular hyperosmotic response, cellular response to tumor necrosis factor, response to cold                                                                                                                                                                         | 6.54       | 19.37      |
| EBF2D2                | Fc-epson receptor signaling pathway, T cell receptor signaling pathway, TNF-dependent toll-like receptor signaling pathway, regulation of transcription from RNA polymerase II promoter in response to hypoxia, stimulatory C-type lectin receptor signaling pathway | 8.48       | 4.31       |
| ADRC1A                | Fc-gamma receptor signaling pathway involved in phagocytosis, sphrin receptor signaling pathway                                                                                                                                                                      | 3.74       | 17.22      |

\*Exponentially Modified Protein Abundance Index ([http://www.matrixscience.com/help/quant\\_empai\\_help.html](http://www.matrixscience.com/help/quant_empai_help.html)).

**Table S9.** Primer sequences for quantitative real-time PCR.

**Table S9. Primer sequences for quantitative real-time PCR.**

| Gens                 | Accession No.  | Sequences (5'→ 3')                                                        | Length (bp) |
|----------------------|----------------|---------------------------------------------------------------------------|-------------|
| human ASS1           | NM_000050.4    | Forward: CATCCTTTACCATGCTCATTTAGAC<br>Reverse: ATTGTAGAGAGACAGTGGGGACTC   | 250         |
| human ITGA5          | NM_002205.4    | Forward: CTGCTACCTCTCCACAGATAACTTC<br>Reverse: GATCAGGTAAGTAAAGAT         | 229         |
| human p65            | XM_011545207.2 | Forward: GGAGAAACGTAAAAGGACATATGAG<br>Reverse: AAACCTCATCATAGTTGATGGTGCTC | 193         |
| human p50            | NM_001165412.1 | Forward: GAGCCAGAGTTTACATCTGATGATT<br>Reverse: AAGGCATTATTAAGTATCCCAGAC   | 164         |
| human cyclin D1      | NM_053056.2    | Forward: CCCC TTGATTAAACACACAGATAC<br>Reverse: AGGTTGAGTACCCTAATTTTCCTTG  | 235         |
| human CD29           | NM_002211.3    | Forward: CTGAAGACTATCCCATTGACCTCTA<br>Reverse: GCTAATGTAAGGCATCACAGTCTTT  | 179         |
| human CD34           | NM_001025109.1 | Forward: CCTGCTCTCTTGAATGATATAGCC<br>Reverse: GAGACTAGAACTGAGCTGTTTGTC    | 227         |
| human CD44           | NM_000610.3    | Forward: ACTAGTGTCAAGTGCCTCTTGTT<br>Reverse: GCCTCTTTTTGGGAATATCTAGAAG    | 227         |
| human CD45           | NM_001267798.1 | Forward: TTCTTAGGGTAACAGAGGAGGAAAT<br>Reverse: ACAATACTTCTGTGTCCAGAAAGG   | 167         |
| human CD90           | NM_001311160.1 | Forward: CAATCGGAGATCACTATGCTTTCT<br>Reverse: ACTGCTTCATATACGTGAGACACAA   | 177         |
| human Ki67           | NM_001145966.1 | Forward: AACACCTACAAAATGACTTCTCTGG<br>Reverse: TAGTAGTGTGCTTCTGACCTCTT    | 204         |
| human PCNA           | NM_002592.2    | Forward: CAAGTAATGTCGATAAAGAGGAGGA<br>Reverse: TGGGAGCCAAGTAGTATTTTAAGTG  | 207         |
| human PPAR $\gamma$  | NM_001330615.1 | Forward: AGCATTCTACTCCACATTACGAAG<br>Reverse: CATGAGGCTTATTGTAGAGCTGAGT   | 169         |
| human FABP4          | NM_001442.2    | Forward: AAGTCAAGAGCACCATAACCTTAGA<br>Reverse: CCACAGAATGTTGTAGAGTTCAATG  | 217         |
| human C/EBP $\alpha$ | NM_001285829.1 | Forward: GTTTGTACTGTATGCCTTCAGCATT<br>Reverse: AGAGTCTCATTTTGGCAAGTATCC   | 248         |
| human $\beta$ -actin | NM_001101      | Forward: TGGCAGCCAGCACAATGAA<br>Reverse: CTAAGTCATAGTCGCCTAGAAGCA         | 186         |
